# Supplementary material for: HSP90 differentially stabilizes plant ABCB-type auxin transporters on the plasma membrane
Source: Nat Commun. 2025 Sep 30;16:8643. doi: 10.1038/s41467-025-63780-w (PMC12484997; doi:10.1038/s41467-025-63780-w)
Supplement: Supplementary file 3 — Supplementary Data 1 [file 41467_2025_63780_MOESM3_ESM.xlsx]

## Sheet: proteinGroups_fromPerseus
Protein IDs	Majority protein IDs	Protein names	Gene names	Fasta headers	Number of proteins	wt_1(log2)	wt_2(log2)	wt_3(log2)	wt_4(log2)	wt_gda_1(log2)	wt_gda_2(log2)	wt_gda_3(log2)	wt_gda_4(log2)	twd13_1(log2)	twd13_2(log2)	twd13_3(log2)	twd13_4(log2)	hsp901_1(log2)	hsp901_2(log2)	hsp901_3(log2)	hsp901_4(log2)	hsp904_1(log2)	hsp904_3(log2)	hsp904_4(log2)	hsp903_1(log2)	hsp903_2(log2)	hsp903_3(log2)	hsp903_4(log2)	hsp10H_1(log2)	hsp10H_2(log2)	hsp10H_3(log2)	hsp10H_4(log2)	hsp984_1(log2)	hsp984_2(log2)	hsp984_3(log2)	hsp984_4(log2)	Peptides	Sequence coverage [%]	Mol. weight [kDa]	Sequence length	Q-value	Score	ExpA_1	ExpA_2	ExpA_3	ExpA_4	ExpA_5	ExpA_6	ExpA_7
Q9S9P1	Q9S9P1	40S ribosomal protein S12-1	RPS12A	sp|Q9S9P1|RS121_ARATH 40S ribosomal protein S12-1 OS=Arabidopsis thaliana GN=RPS12A PE=2 SV=1	1	20.5021	20.4897	20.4998	20.4517	20.3899	20.3445	20.4078	20.4325	20.2427	20.3943	20.47	20.4574	20.359	20.4259	20.4798	20.4418	19.9652	20.1396	20.2597	20.3582	20.2641	20.2292	20.2147	20.4564	20.5044	20.5021	20.546	19.9503	19.9847	20.0454	19.8812	13	93.1	15.377	144	0	266.77	20.0785	20.0591	20.0507	19.9955	19.9241	19.9135	19.9806
O65370	O65370		F12F1.4	tr|O65370|O65370_ARATH At1g12080 OS=Arabidopsis thaliana GN=F12F1.4 PE=1 SV=1	1	18.0785	18.1306	17.8242	18.0466	17.6249	17.3134	17.4815	18.1224	17.6846	17.0393	17.1962	17.2945	18.5302	18.2565	19.1805	18.2383	17.5837	17.7498	17.7067	17.9506	17.7943	18.0455	17.8004	18.9101	18.6486	18.4889	18.944	17.7045	17.9881	17.6411	17.6755	10	91.3	15.382	138	0	155.55	18.7047	18.7498	18.4249	18.6401	18.2089	17.9321	18.1041
Q9STT2	Q9STT2	Vacuolar protein sorting-associated protein 29	VPS29	sp|Q9STT2|VPS29_ARATH Vacuolar protein sorting-associated protein 29 OS=Arabidopsis thaliana GN=VPS29 PE=2 SV=1	1	18.0705	18.1015	18.1711	18.162	17.9808	18.0076	17.9467	18.0523	17.9886	18.0377	18.0425	18.0352	18.0991	18.1235	18.1516	18.155	17.9146	18.0186	18.0784	18.1577	18.1262	18.1541	18.1368	18.0156	18.0143	18.0809	18.0486	18.1457	18.1913	18.2265	18.2209	13	91.1	20.968	190	0	111.6	17.9021	17.926	17.9772	17.9609	17.7702	17.8318	17.7747
Q9SKZ3	Q9SKZ3	40S ribosomal protein S12-2	RPS12C	sp|Q9SKZ3|RS122_ARATH 40S ribosomal protein S12-2 OS=Arabidopsis thaliana GN=RPS12C PE=1 SV=1	1	19.9855	19.8868	19.8977	19.8158	19.8674	19.7844	19.9647	19.9259	19.7403	19.932	19.9878	20.0014	19.8133	19.8423	19.9209	19.8535	19.2744	19.4318	19.4653	19.6877	19.4804	19.4516	19.4137	19.8034	19.8048	19.7984	19.749	19.2166	19.1313	19.1775	18.9927	13	88.9	15.329	144	0	218.99	19.916	19.8103	19.8028	19.7137	19.7557	19.7075	19.8916
Q9LUT2	Q9LUT2	S-adenosylmethionine synthase 4	METK4	sp|Q9LUT2|METK4_ARATH S-adenosylmethionine synthase 4 OS=Arabidopsis thaliana GN=METK4 PE=1 SV=1	1	20.4047	20.503	20.4594	20.5001	20.4438	20.5817	20.3849	20.5048	20.1503	19.8923	19.9207	20.0248	20.5275	20.4732	20.4052	20.4514	20.4748	20.4297	20.3666	20.5567	20.5869	20.4679	20.5814	20.0657	19.9923	20.1448	20.0611	20.3299	20.428	20.518	20.4392	29	88.8	42.795	393	0	323.31	20.4694	20.5608	20.4987	20.5322	20.4664	20.639	20.4461
Q9SJL8	Q9SJL8	S-adenosylmethionine synthase 3	METK3	sp|Q9SJL8|METK3_ARATH S-adenosylmethionine synthase 3 OS=Arabidopsis thaliana GN=METK3 PE=1 SV=1	1	20.978	21.1085	21.0253	21.0858	21.0856	21.1762	21.0028	21.1878	20.7619	20.4895	20.5402	20.6383	21.1001	21.0471	21.0331	21.0271	21.049	21.0474	21.0275	21.2576	21.2879	21.1515	21.294	20.6585	20.6046	20.7639	20.6895	20.9766	21.1445	21.2478	21.1322	30	87.7	42.497	390	0	323.31	21.012	21.1353	21.0338	21.0871	21.0774	21.2027	21.0332
Q9LE22	Q9LE22	Probable calcium-binding protein CML27	CML27	sp|Q9LE22|CML27_ARATH Probable calcium-binding protein CML27 OS=Arabidopsis thaliana GN=CML27 PE=1 SV=1	1	18.1025	18.0941	18.0882	17.947	17.9885	17.8695	17.9042	17.9196	18.2713	18.4112	18.3576	18.387	18.1102	18.09	18.1148	18.084	18.0625	17.9997	17.7194	17.9083	18.0277	17.9244	17.8903	18.5469	18.5522	18.6692	18.507	17.9622	17.8618	17.9081	17.8806	12	87.6	18.35	170	0	323.31	18.0876	18.0722	18.0479	17.8995	17.9315	17.8472	17.8857
P92963;O23561	P92963	Ras-related protein RABB1c	RABB1C	sp|P92963|RAB1C_ARATH Ras-related protein RABB1c OS=Arabidopsis thaliana GN=RABB1C PE=1 SV=1	2	18.0175	18.0485	17.9984	17.945	18.0151	17.9469	17.9097	17.8912	17.8584	17.8299	17.8371	17.801	18.1238	18.0288	17.9961	17.9545	17.9293	17.877	17.8235	17.8122	17.8569	17.8206	17.7781	18.6669	18.631	18.5904	18.6059	17.9559	17.6461	17.768	17.8907	17	86.3	23.164	211	0	195.57	18.0197	18.0438	17.9752	17.9147	17.9752	17.9417	17.9084
O49453;Q9ZWA3	O49453	Uncharacterized protein At4g28440		sp|O49453|Y4844_ARATH Uncharacterized protein At4g28440 OS=Arabidopsis thaliana GN=At4g28440 PE=1 SV=1	2	18.6574	18.4917	18.574	18.4767	18.5591	18.4832	18.5979	18.4913	18.6647	18.6247	18.6253	18.585	18.3867	18.3563	18.4697	18.4779	18.5266	18.6039	18.6211	18.3726	18.2099	18.4002	18.3594	18.2885	18.3638	18.4707	18.3444	17.9024	18.0007	17.9635	18.0992	13	86.3	16.459	153	0	138.07	18.7691	18.5964	18.6603	18.5558	18.6286	18.5875	18.7061
Q948K8	Q948K8	Ras-related protein RABG3a	RABG3A	sp|Q948K8|RAG3A_ARATH Ras-related protein RABG3a OS=Arabidopsis thaliana GN=RABG3A PE=2 SV=1	1	18.5276	18.5369	18.4823	18.3348	18.51	18.4801	18.4804	18.3946	18.4674	18.6036	18.5864	18.5548	18.6006	18.5539	18.5541	18.4902	18.4079	18.4519	18.3993	18.3568	18.4133	18.3622	18.3311	19.17	19.1994	19.1492	19.1163	18.3592	18.1333	18.2824	18.3215	14	85.9	22.75	206	0	219.78	18.5593	18.5616	18.4886	18.3339	18.4996	18.5044	18.5085
Q9C505	Q9C505	Eukaryotic translation initiation factor 5A-3	ELF5A-3	sp|Q9C505|IF5A3_ARATH Eukaryotic translation initiation factor 5A-3 OS=Arabidopsis thaliana GN=ELF5A-3 PE=2 SV=1	1	19.0814	19.1414	19.1405	19.1296	19.0692	18.9559	19.0954	19.1263	19.2015	19.3298	19.3931	19.3905	19.0057	19.0003	18.9901	19.0012	18.8321	18.8684	18.9794	19.0474	18.9085	19.0193	19.0178	18.9372	18.9873	19.059	18.931	18.7442	18.7685	18.7705	18.6751	13	85.4	17.207	158	0	97.129	18.9548	19.0078	18.9885	18.9704	18.9005	18.822	18.9652
Q03250	Q03250	Glycine-rich RNA-binding protein 7	RBG7	sp|Q03250|RBG7_ARATH Glycine-rich RNA-binding protein 7 OS=Arabidopsis thaliana GN=RBG7 PE=1 SV=1	1	19.8574	19.5898	19.7326	19.425	19.1561	19.1576	19.2948	19.304	19.4981	19.2623	19.2292	19.2614	19.5158	19.3736	19.6329	19.4955	19.6289	19.6533	19.6237	19.161	19.0702	19.0161	19.0829	19.2757	19.2717	19.3844	19.1813	18.6142	18.5952	18.6597	18.488	14	85.2	16.89	176	0	323.31	20.0584	19.7838	19.9082	19.5934	19.3149	19.3512	19.4922
P46645	P46645	Aspartate aminotransferase, cytoplasmic isozyme 1	ASP2	sp|P46645|AAT2_ARATH Aspartate aminotransferase, cytoplasmic isozyme 1 OS=Arabidopsis thaliana GN=ASP2 PE=1 SV=2	1	19.85	20.1414	20.0092	19.9978	20.0869	20.0189	19.9678	20.0301	20.1543	20.1648	20.0355	20.0671	20.0344	20.0988	20.008	20.1276	20.0226	19.9884	19.8957	20.0554	20.0667	20.2206	20.2022	19.7557	19.8494	19.8987	19.7069	19.8245	19.7153	20.0616	20.0058	28	84.9	44.266	405	0	323.31	19.7657	20.0501	19.8995	19.8809	19.9604	19.9272	19.8799
P46422;Q9SLM6	P46422;Q9SLM6	Glutathione S-transferase F2;Glutathione S-transferase F3	GSTF2;GSTF3	sp|P46422|GSTF2_ARATH Glutathione S-transferase F2 OS=Arabidopsis thaliana GN=GSTF2 PE=1 SV=3;sp|Q9SLM6|GSTF3_ARATH Glutathione S-transferase F3 OS=Arabidopsis thaliana GN=GSTF3 PE=2 SV=1	2	19.7313	20.3251	19.9127	19.7322	20.2675	20.0763	20.1052	19.9456	19.7836	19.7711	19.5181	19.7998	19.9682	19.5799	19.745	19.8698	19.9039	19.8358	19.589	20.0048	20.0282	19.9231	20.0889	19.8824	19.8568	19.9805	19.6255	19.954	20.0646	19.6217	19.8117	17	84.9	24.128	212	0	323.31	20.0205	20.6073	20.1765	19.9888	20.5145	20.3581	20.3909
Q93VP3	Q93VP3	Eukaryotic translation initiation factor 5A-2	ELF5A-2	sp|Q93VP3|IF5A2_ARATH Eukaryotic translation initiation factor 5A-2 OS=Arabidopsis thaliana GN=ELF5A-2 PE=1 SV=1	1	19.9724	19.9095	19.905	19.7949	19.9482	19.8447	19.9668	19.9586	19.8952	19.9383	20.053	19.9753	19.8761	19.7881	19.7856	19.7416	19.6771	19.6092	19.7572	19.862	19.6651	19.7499	19.7777	19.4971	19.5984	19.5946	19.4515	19.2488	19.2875	19.3169	19.2788	13	84.9	17.14	159	0	265.82	19.8328	19.7629	19.74	19.6228	19.7665	19.6977	19.8237
Q9LXM8	Q9LXM8	60S acidic ribosomal protein P2-4	RPP2D	sp|Q9LXM8|RLA24_ARATH 60S acidic ribosomal protein P2-4 OS=Arabidopsis thaliana GN=RPP2D PE=2 SV=1	1	16.7279	16.5947	16.8479	16.6735	16.743	16.6471	16.6418	16.7386	16.3258	16.1264	16.3074	16.3044	16.28	16.5272	16.7732	16.5369	16.3059	16.528	16.4765	16.1535	15.9359	15.8064	15.7621	16.3424	16.3983	16.3652	16.2739	15.9889	16.0769	16.4791	16.0556	5	84.7	11.015	111	0	184.17	15.6074	15.4671	15.702	15.5203	15.5803	15.5192	15.5177
O23654	O23654	V-type proton ATPase catalytic subunit A	VHA-A	sp|O23654|VATA_ARATH V-type proton ATPase catalytic subunit A OS=Arabidopsis thaliana GN=VHA-A PE=1 SV=1	1	21.2851	21.3063	21.2689	21.1615	21.1949	21.1378	21.0923	21.1945	20.9836	21.0526	21.0737	21.1072	21.272	21.2754	21.2297	21.2753	21.1547	21.1176	20.9056	21.3058	21.2909	21.1532	21.2864	21.5804	21.5855	21.6878	21.5631	21.4361	21.3168	21.3353	21.4296	46	84.3	68.812	623	0	323.31	21.21	21.2242	21.1684	21.0538	21.0776	21.0553	21.0137
Q9FJA6	Q9FJA6	40S ribosomal protein S3-3	RPS3C	sp|Q9FJA6|RS33_ARATH 40S ribosomal protein S3-3 OS=Arabidopsis thaliana GN=RPS3C PE=1 SV=1	1	20.6434	20.6389	20.5759	20.6009	20.5114	20.4173	20.5211	20.5431	20.4714	20.5434	20.6467	20.5978	20.4876	20.5666	20.5856	20.5872	20.3214	20.2806	20.3671	20.3202	20.2681	20.3236	20.3183	20.3463	20.397	20.3604	20.3823	20.2234	20.1988	20.2743	20.1771	23	84.3	27.458	248	0	93.041	20.5096	20.498	20.4167	20.4345	20.3354	20.2761	20.3837
Q9SRY5	Q9SRY5	Glutathione S-transferase F7	GSTF7	sp|Q9SRY5|GSTF7_ARATH Glutathione S-transferase F7 OS=Arabidopsis thaliana GN=GSTF7 PE=2 SV=3	1	19.9198	20.1494	20.0868	19.917	21.1909	21.1479	21.2863	20.8593	18.9912	18.7772	18.78	18.756	19.7269	19.5595	19.6269	19.8212	19.5626	19.3689	19.2953	20.0435	20.0782	19.9258	20.123	19.2629	19.2972	19.4729	19.3033	20.2427	20.0957	19.4773	19.9863	16	84.2	23.598	209	0	260.85	20.1096	20.3321	20.2512	20.0742	21.3385	21.3302	21.4725
P49690	P49690	60S ribosomal protein L23	RPL23A	sp|P49690|RL23_ARATH 60S ribosomal protein L23 OS=Arabidopsis thaliana GN=RPL23A PE=2 SV=3	1	21.1396	21.1061	21.113	21.0995	21.0594	21.0446	21.0849	21.1155	20.9627	20.9666	21.0466	21.0371	20.9973	21.039	21.0979	21.0495	20.9121	20.9463	20.9966	20.9835	20.9125	20.89	20.8808	20.9135	20.9183	20.907	20.9334	20.7974	20.7684	20.8364	20.6974	13	83.6	15.027	140	0	323.31	21.3366	21.296	21.2846	21.2638	21.2142	21.2342	21.2783
Q9SGW3;Q9FHY0	Q9SGW3	26S proteasome non-ATPase regulatory subunit 8 homolog A	RPN12A	sp|Q9SGW3|PSD8A_ARATH 26S proteasome non-ATPase regulatory subunit 8 homolog A OS=Arabidopsis thaliana GN=RPN12A PE=1 SV=1	2	20.0016	19.9939	20.0508	19.9648	19.9762	20.0027	20.1501	20.0581	19.8092	19.7011	19.8233	19.7254	19.8808	19.9986	19.9482	20.0409	19.8563	19.9792	19.9427	20.0603	19.9735	19.9209	19.9778	19.9466	19.9988	20.0123	19.9548	19.8573	19.7465	19.9424	19.9387	18	83.5	30.706	267	0	323.31	19.902	19.8872	19.9257	19.8326	19.8344	19.8956	20.0469
Q9SIP7	Q9SIP7	40S ribosomal protein S3-1	RPS3A	sp|Q9SIP7|RS31_ARATH 40S ribosomal protein S3-1 OS=Arabidopsis thaliana GN=RPS3A PE=1 SV=1	1	21.6492	21.5812	21.6327	21.6211	21.5156	21.482	21.5474	21.592	21.4457	21.4463	21.5072	21.4804	21.4883	21.5757	21.6311	21.5576	21.3675	21.3962	21.4485	21.4536	21.3793	21.335	21.3389	21.4176	21.4345	21.4052	21.4206	21.2171	21.174	21.2634	21.11	24	83.2	27.519	250	0	308.07	21.5933	21.5183	21.5514	21.5326	21.4176	21.4187	21.488
Q93VR4	Q93VR4	MLP-like protein 423	MLP423	sp|Q93VR4|ML423_ARATH MLP-like protein 423 OS=Arabidopsis thaliana GN=MLP423 PE=2 SV=1	1	18.9023	19.1009	18.9407	18.9749	19.0357	19.1073	18.8345	18.9688	18.5428	18.3178	18.3756	18.4217	19.0989	19.0301	18.9228	19.0181	18.9421	18.8	18.6121	19.0683	19.3048	18.9077	18.9792	18.3976	18.2191	18.285	18.3935	19.425	19.3354	19.2274	19.1569	12	83.2	17.054	155	0	91.293	19.2307	19.4223	19.2437	19.2707	19.3218	19.4283	19.1593
P34790	P34790	Peptidyl-prolyl cis-trans isomerase CYP18-3	CYP18-3	sp|P34790|CP18C_ARATH Peptidyl-prolyl cis-trans isomerase CYP18-3 OS=Arabidopsis thaliana GN=CYP18-3 PE=1 SV=1	1	18.4321	18.5189	18.3431	18.5204	18.2205	18.2385	18.1927	18.2505	18.5047	18.2718	18.4188	18.4211	18.5542	18.646	18.3722	18.6789	18.4653	18.3675	18.2136	18.4534	18.4555	18.5377	18.5755	18.371	18.1393	18.0819	18.2661	18.5772	18.6486	18.5472	18.4879	12	83.1	18.373	172	0	251.55	18.3798	18.4595	18.2654	18.4355	18.1261	18.1788	18.1368
Q9SXE9	Q9SXE9		At1g62480	tr|Q9SXE9|Q9SXE9_ARATH At1g62480/T3P18_4 OS=Arabidopsis thaliana GN=At1g62480 PE=1 SV=1	1	18.5057	18.6177	18.5391	18.6713	18.1961	17.9342	18.1269	18.3611	18.2939	18.0483	18.0637	18.2266	19.1534	19.0185	18.7436	19.1432	18.0944	18.3176	18.1277	18.7245	18.5515	18.7231	18.6505	19.877	19.6251	19.6844	19.8508	18.5614	18.7944	18.4457	18.4535	13	82.9	16.628	152	0	313.38	18.5939	18.6989	18.6019	18.7269	18.2421	18.015	18.2115
P62090	P62090	Photosystem I iron-sulfur center	psaC	sp|P62090|PSAC_ARATH Photosystem I iron-sulfur center OS=Arabidopsis thaliana GN=psaC PE=3 SV=2	1	17.6141	17.6343	17.6931	17.93	17.8052	17.6797	17.733	17.6691	18.1983	18.458	18.1959	18.3154	18.1808	18.0122	18.037	17.9792	18.453	18.437	18.3239	17.7824	18.1288	18.005	17.8624	19.1227	19.0104	18.4368	18.5989	18.4228	18.0921	18.073	18.0327	7	82.7	9.0384	81	0	210.05	17.4377	17.4509	17.4912	17.7209	17.5867	17.4958	17.553
Q8VZ50	Q8VZ50	Probable calcium-binding protein CML14	CML14	sp|Q8VZ50|CML14_ARATH Probable calcium-binding protein CML14 OS=Arabidopsis thaliana GN=CML14 PE=2 SV=1	1	16.1622	16.2091	16.2411	16.2801	16.2543	16.1957	16.1707	16.1164	16.3549	16.4297	16.3606	16.4001	16.2848	16.3363	16.3372	16.3997	16.2943	16.3933	16.3898	16.2151	16.2345	16.2744	16.2314	16.5192	16.5915	16.7197	16.5674	16.1092	16.217	16.2303	16.1354	11	81.8	16.579	148	0	59.578	16.3077	16.3477	16.3613	16.393	16.3577	16.3339	16.3127
Q94AZ4	Q94AZ4	Probable calcium-binding protein CML13	CML13	sp|Q94AZ4|CML13_ARATH Probable calcium-binding protein CML13 OS=Arabidopsis thaliana GN=CML13 PE=2 SV=1	1	19.2817	19.3012	19.3413	19.3236	19.1718	19.0984	19.201	19.2151	19.3976	19.3385	19.3628	19.2951	19.3159	19.3284	19.2728	19.253	19.2485	19.2635	19.3407	19.1713	19.0593	19.1117	19.1344	19.3179	19.3692	19.3772	19.2903	19.0441	19.0393	18.9825	18.8481	11	81.8	16.517	148	0	150.47	18.7013	18.7137	18.7355	18.7106	18.5491	18.5106	18.6169
Q9LFW1;Q9LUE6	Q9LFW1	UDP-arabinopyranose mutase 2	RGP2	sp|Q9LFW1|RGP2_ARATH UDP-arabinopyranose mutase 2 OS=Arabidopsis thaliana GN=RGP2 PE=1 SV=1	2	20.0875	19.9841	19.9066	19.7509	20.3881	20.2468	20.5192	20.2592	19.706	19.7129	19.9035	19.8604	19.8302	19.8729	19.8613	20.0104	19.5825	19.611	19.4809	20.2345	20.1321	20.1032	20.1987	19.9231	19.9626	20.0094	19.804	20.5101	20.3295	20.3265	20.4975	25	81.7	40.89	360	0	323.31	20.1014	19.9909	19.8951	19.7322	20.3598	20.2533	20.5296
Q8W455	Q8W455			tr|Q8W455|Q8W455_ARATH Expressed protein OS=Arabidopsis thaliana GN=At2g36835 PE=2 SV=1	1	16.6221	16.6694	16.7	16.7499	16.6557	16.6515	16.4946	16.5683	17.1083	17.2813	17.1424	17.277	16.8031	16.8474	16.7685	16.6849	16.953	16.8703	16.7958	16.712	16.8226	16.948	16.8221	16.8674	16.904	16.903	16.8631	16.8419	16.8952	16.8997	16.9704	7	81.5	13.387	124	0	35.536	16.4472	16.4875	16.4997	16.5424	16.4387	16.4693	16.3162
Q8W4A0	Q8W4A0	Eukaryotic translation initiation factor 3 subunit M	F14P3.15	tr|Q8W4A0|Q8W4A0_ARATH Eukaryotic translation initiation factor 3 subunit M OS=Arabidopsis thaliana GN=F14P3.15 PE=1 SV=1	1	19.708	19.6813	19.7347	19.5858	19.7228	19.7482	19.7369	19.7133	19.6935	19.7598	19.8256	19.6792	19.4601	19.4754	19.5636	19.5402	19.4784	19.5799	19.6077	19.7322	19.5441	19.6504	19.623	19.6041	19.7008	19.8359	19.5965	19.2395	19.235	19.3496	19.3243	26	81.1	46.784	417	0	323.31	19.8924	19.8587	19.8937	19.7376	19.865	19.9251	19.9178
P09468	P09468	ATP synthase epsilon chain, chloroplastic	atpE	sp|P09468|ATPE_ARATH ATP synthase epsilon chain, chloroplastic OS=Arabidopsis thaliana GN=atpE PE=1 SV=2	1	18.4816	18.5137	18.5122	18.5831	18.6127	18.6704	18.5425	18.5067	19.0703	19.1115	18.9927	18.9462	18.819	18.7593	18.6568	18.6284	19.1433	19.0065	18.9543	18.5714	18.8131	18.7719	18.733	19.0657	19.0719	18.7699	18.8912	19.0091	18.8596	18.8541	18.875	12	81.1	14.499	132	0	323.31	18.5453	18.5703	18.5504	18.6142	18.6342	18.7266	18.6026
Q9C9W5	Q9C9W5	Glycerate dehydrogenase HPR, peroxisomal	HPR	sp|Q9C9W5|HPR1_ARATH Glycerate dehydrogenase HPR, peroxisomal OS=Arabidopsis thaliana GN=HPR PE=1 SV=1	1	20.4802	20.1926	20.2105	19.9304	20.1824	20.246	20.5077	20.1412	20.5918	20.867	20.8464	20.8099	20.0084	19.9301	20.0438	19.9489	20.3305	20.1583	20.2957	19.8276	19.7067	19.7655	19.7979	19.5708	19.5313	19.6635	19.7486	20.0596	19.8372	19.5609	20.005	30	80.8	42.247	386	0	323.31	20.2029	19.9082	19.9078	19.6205	19.8629	19.9613	20.2268
P46248	P46248	Aspartate aminotransferase, chloroplastic	ASP5	sp|P46248|AAT5_ARATH Aspartate aminotransferase, chloroplastic OS=Arabidopsis thaliana GN=ASP5 PE=1 SV=2	1	19.7109	19.6898	19.7328	19.9109	19.6206	19.6232	19.5586	19.6721	19.9599	19.6918	19.6945	19.6059	19.8289	19.7237	19.6075	19.7755	20.1903	20.1181	19.9924	19.8452	19.8841	19.9436	20.0314	19.1208	19.085	19.142	19.1032	20.0187	20.2239	20.2476	20.1322	31	79.9	49.831	453	0	323.31	19.9042	19.876	19.9006	20.0716	19.7717	19.8091	19.7483
P25696	P25696	Bifunctional enolase 2/transcriptional activator	ENO2	sp|P25696|ENO2_ARATH Bifunctional enolase 2/transcriptional activator OS=Arabidopsis thaliana GN=ENO2 PE=1 SV=1	1	21.015	20.8449	20.7601	20.6202	20.9505	20.9538	21.2113	20.8762	20.6303	20.3638	20.3539	20.3912	20.6686	20.5723	20.6082	20.7248	20.9419	20.5928	20.298	20.599	20.58	20.5089	20.62	20.2875	20.2116	20.2894	20.1534	20.912	20.8313	20.6538	20.837	26	79.7	47.719	444	0	323.31	20.7915	20.6144	20.5112	20.3642	20.6849	20.723	20.9843
Q9M328	Q9M328		F5K20_290	tr|Q9M328|Q9M328_ARATH AT3G53990 protein OS=Arabidopsis thaliana GN=F5K20_290 PE=2 SV=1	1	18.996	19.0435	18.8536	18.7793	19.1035	19.0006	18.8934	18.9487	19.0603	19.2098	19.1161	19.2393	19.0642	18.9135	18.9773	18.9221	18.8488	18.8093	18.7916	18.8323	18.901	18.8041	18.7495	19.3733	19.4156	19.2274	19.1883	18.8724	18.7638	18.8264	18.8286	13	79.4	17.793	160	0	229.41	18.8549	18.8954	18.6872	18.6056	18.9203	18.8521	18.7487
P25858	P25858	Glyceraldehyde-3-phosphate dehydrogenase GAPC1, cytosolic	GAPC1	sp|P25858|G3PC1_ARATH Glyceraldehyde-3-phosphate dehydrogenase GAPC1, cytosolic OS=Arabidopsis thaliana GN=GAPC1 PE=1 SV=2	1	21.5765	21.8016	21.9212	22.1678	21.3941	21.6846	21.3881	21.8653	21.7989	20.9022	21.1046	21.169	21.9675	22.0273	22.0388	22.107	22.1759	22.2794	22.3728	21.9484	22.1778	21.8397	21.9274	20.897	20.8492	21.0356	21.0369	22.1015	22.1714	22.2962	22.0523	29	79.3	36.914	338	0	323.31	21.5059	21.724	21.8252	22.0646	21.2813	21.6066	21.3139
Q9FX54	Q9FX54	Glyceraldehyde-3-phosphate dehydrogenase GAPC2, cytosolic	GAPC2	sp|Q9FX54|G3PC2_ARATH Glyceraldehyde-3-phosphate dehydrogenase GAPC2, cytosolic OS=Arabidopsis thaliana GN=GAPC2 PE=1 SV=1	1	16.3062	16.5166	16.7273	17.0216	16.2022	16.4354	16.1344	16.5861	16.626	15.9255	15.9407	15.8828	16.6984	16.8391	16.8351	16.887	17.0292	17.1057	17.2528	16.7113	17.0054	16.7405	16.7874	15.4967	15.5022	15.4931	15.6337	16.9023	17.0554	17.2165	16.9355	29	79.3	36.913	338	0	67.692	16.7052	16.9087	17.1009	17.388	16.559	16.827	16.5299
Q42406	Q42406	Peptidyl-prolyl cis-trans isomerase CYP18-4	CYP18-4	sp|Q42406|CP18D_ARATH Peptidyl-prolyl cis-trans isomerase CYP18-4 OS=Arabidopsis thaliana GN=CYP18-4 PE=1 SV=1	1	19.5959	19.6335	19.3587	19.285	19.4675	19.5866	19.4467	19.4901	19.6577	19.5069	19.4239	19.6587	19.4397	19.4711	19.4859	19.5421	19.385	19.3624	19.1961	19.5033	19.514	19.3376	19.4135	19.2694	19.1517	19.175	19.141	19.3468	19.3995	19.3795	19.2831	12	79.1	18.378	172	0	278.28	19.929	19.9596	19.6663	19.5855	19.7584	19.9123	19.7762
Q9LRS0	Q9LRS0	Peroxisomal (S)-2-hydroxy-acid oxidase GLO2	GLO2	sp|Q9LRS0|GLO2_ARATH Peroxisomal (S)-2-hydroxy-acid oxidase GLO2 OS=Arabidopsis thaliana GN=GLO2 PE=1 SV=1	1	20.0723	20.0999	20.1798	20.4824	19.9837	20.1515	20.0145	20.0772	20.6893	20.7134	20.6087	20.5864	20.4428	20.412	20.2344	20.3146	20.612	20.6151	20.7201	20.3342	20.4437	20.3899	20.3929	19.9582	19.8661	19.9116	20.0229	20.5901	20.7609	20.7906	20.7185	25	78.7	40.306	367	0	323.31	20.1776	20.1981	20.2596	20.555	20.0467	20.2493	20.1162
Q9SKQ0	Q9SKQ0	Peptidyl-prolyl cis-trans isomerase CYP19-2	CYP19-2	sp|Q9SKQ0|CP19B_ARATH Peptidyl-prolyl cis-trans isomerase CYP19-2 OS=Arabidopsis thaliana GN=CYP19-2 PE=1 SV=1	1	15.1666	15.1129	15.1415	15.0517	15.2703	15.333	15.334	15.2765	15.2468	15.2337	15.2113	15.3397	15.1453	15.0328	15.0031	15.1838	15.0961	15.0824	15.1976	15.0937	15.2145	15.1254	15.1834	14.9217	14.9285	15.0405	14.9561	15.0464	15.1571	15.0617	15.0619	11	78.7	18.464	174	0	15.108	15.3883	15.3277	15.3378	15.2408	15.4499	15.5473	15.5521
Q9SSK9	Q9SSK9	MLP-like protein 28	MLP28	sp|Q9SSK9|MLP28_ARATH MLP-like protein 28 OS=Arabidopsis thaliana GN=MLP28 PE=1 SV=1	1	18.659	18.9167	18.5281	18.5481	18.4458	18.5702	18.6851	18.4704	18.1314	17.9118	18.0203	17.9237	18.7755	18.5786	18.3031	18.5343	18.809	18.4255	18.3389	18.2103	18.3875	18.2487	18.3303	18.5224	18.451	18.3063	18.4794	19.18	19.0544	18.4505	18.9701	19	78.5	37.614	335	0	323.31	18.5261	18.7767	18.3698	18.3825	18.2707	18.4299	18.5486
Q94A97	Q94A97	Ubiquitin-conjugating enzyme E2 35	UBC35	sp|Q94A97|UBC35_ARATH Ubiquitin-conjugating enzyme E2 35 OS=Arabidopsis thaliana GN=UBC35 PE=1 SV=1	1	17.6554	17.3079	17.5176	17.241	17.4787	17.488	17.5431	17.4524	17.1601	17.0107	17.022	17.1277	17.1756	17.166	17.3612	17.332	17.3319	17.1202	16.9679	16.9893	17.1995	16.9493	16.8758	16.8169	16.8909	16.9318	16.8342	17.2003	17.0751	17.0054	17.0874	9	78.4	17.192	153	0	99.554	17.9291	17.5746	17.7658	17.4821	17.7103	17.7543	17.8133
Q9FZ48	Q9FZ48	Ubiquitin-conjugating enzyme E2 36	UBC36	sp|Q9FZ48|UBC36_ARATH Ubiquitin-conjugating enzyme E2 36 OS=Arabidopsis thaliana GN=UBC36 PE=1 SV=1	1	16.7492	16.3839	16.5131	16.3197	16.6234	16.6241	16.702	16.5248	16.2671	16.1611	16.1167	16.2308	16.3141	16.3131	16.4616	16.3486	16.5698	16.3236	16.1447	16.0274	16.3045	16.0609	15.9517	15.99	15.892	16.0799	15.9458	16.3773	16.1364	16.0372	16.1494	9	78.4	17.22	153	0	42.86	17.2388	16.8665	16.9773	16.7767	17.0709	17.1064	17.188
P48491	P48491	Triosephosphate isomerase, cytosolic	CTIMC	sp|P48491|TPIS_ARATH Triosephosphate isomerase, cytosolic OS=Arabidopsis thaliana GN=CTIMC PE=1 SV=2	1	18.7836	18.7933	18.6749	18.6772	18.7256	18.8114	18.93	18.7731	19.1106	19.1498	19.0934	19.2443	19.003	18.9465	18.857	19.0231	18.6943	18.8012	18.5773	18.8788	18.8605	18.8572	18.8733	19.331	19.2021	19.2802	19.2016	18.9427	19.011	18.7415	18.7184	16	78.3	27.169	254	0	323.31	18.3419	18.3445	18.2078	18.2029	18.2417	18.3622	18.4848
Q9LS94	Q9LS94	Ras-related protein RABG3f	RABG3F	sp|Q9LS94|RAG3F_ARATH Ras-related protein RABG3f OS=Arabidopsis thaliana GN=RABG3F PE=2 SV=1	1	18.4884	18.6233	18.4711	18.509	18.6001	18.4857	18.501	18.4143	18.4774	18.6105	18.5789	18.5849	18.6126	18.6171	18.4678	18.4919	18.5563	18.4921	18.4978	18.4929	18.6151	18.568	18.4928	19.3737	19.346	19.2796	19.2353	18.4995	18.3463	18.4142	18.4665	13	78.2	23.102	206	0	150.67	18.7361	18.864	18.6934	18.7241	18.8056	18.726	18.7451
Q9SK22;Q42340	Q9SK22;Q42340	40S ribosomal protein S16-1;40S ribosomal protein S16-3	RPS16A;RPS16C	sp|Q9SK22|RS161_ARATH 40S ribosomal protein S16-1 OS=Arabidopsis thaliana GN=RPS16A PE=2 SV=1;sp|Q42340|RS163_ARATH 40S ribosomal protein S16-3 OS=Arabidopsis thaliana GN=RPS16C PE=2 SV=1	2	20.1115	20.0261	20.0868	20.0186	19.9186	19.8879	19.992	19.9579	19.8682	19.8534	19.9705	19.9004	19.8753	19.9335	19.9445	19.8848	19.7786	19.7994	19.8482	19.873	19.7968	19.7722	19.7365	19.7681	19.7804	19.8207	19.8046	19.6543	19.5961	19.6854	19.5673	17	78.1	16.631	146	0	274.71	20.5368	20.4444	20.4867	20.4113	20.3017	20.3057	20.4137
Q38884;F4II66	Q38884	Eukaryotic translation initiation factor 3 subunit I	TIF3I1	sp|Q38884|EIF3I_ARATH Eukaryotic translation initiation factor 3 subunit I OS=Arabidopsis thaliana GN=TIF3I1 PE=2 SV=2	2	20.0891	20.0333	20.0212	19.9652	20.1265	20.1424	20.1602	20.1276	20.1754	20.2365	20.2827	20.2493	19.9483	19.9328	20.0078	19.9642	19.9695	20.0755	20.2	20.1051	19.9401	20.0534	20.0638	19.9897	20.0923	20.1786	19.9875	19.5766	19.7678	19.8596	19.6819	23	78	36.388	328	0	323.31	20.1361	20.0733	20.0427	19.9795	20.1313	20.1819	20.2036
P23686	P23686	S-adenosylmethionine synthase 1	SAM1	sp|P23686|METK1_ARATH S-adenosylmethionine synthase 1 OS=Arabidopsis thaliana GN=SAM1 PE=1 SV=2	1	19.878	19.7749	19.7904	19.7073	19.8872	20.0131	19.876	19.922	19.1813	18.9755	19.1087	19.1425	19.6503	19.5881	19.6981	19.6764	19.7022	19.6071	19.4939	19.9781	20.0415	19.8559	19.9883	19.2411	19.2528	19.3487	19.3007	19.7736	19.8577	19.9218	19.7757	26	77.9	43.158	393	0	323.31	20.1653	20.0552	20.0523	19.962	20.1323	20.293	20.1598
P43333	P43333	U2 small nuclear ribonucleoprotein A		sp|P43333|RU2A_ARATH U2 small nuclear ribonucleoprotein A OS=Arabidopsis thaliana GN=At1g09760 PE=2 SV=2	1	18.5493	18.3901	18.4036	18.2661	18.4342	18.4655	18.6071	18.4572	18.3572	18.3873	18.426	18.4813	18.2716	18.3243	18.4873	18.4036	18.3297	18.4485	18.5309	18.4209	18.3601	18.4052	18.4094	18.2178	18.2408	18.0466	18.1135	18.3046	18.3401	18.3351	18.3025	18	77.9	28.041	249	0	228.36	18.4366	18.2704	18.2655	18.1208	18.2793	18.3454	18.4908
Q43729	Q43729	Peroxidase 57	PER57	sp|Q43729|PER57_ARATH Peroxidase 57 OS=Arabidopsis thaliana GN=PER57 PE=1 SV=1	1	18.259	18.258	18.3625	18.3998	18.2273	17.8478	17.725	18.0791	18.0182	17.5453	17.6314	17.5063	18.4951	18.1686	18.3797	18.2604	18.0793	18.4308	18.566	18.3448	18.3248	18.3419	18.369	18.1566	18.1011	17.7909	18.0914	18.414	18.5255	18.8142	18.6401	19	77.6	34.098	313	0	323.31	18.4665	18.4585	18.5445	18.5747	18.3926	18.0479	17.929
Q9LF30	Q9LF30	40S ribosomal protein S19-2	RPS19B	sp|Q9LF30|RS192_ARATH 40S ribosomal protein S19-2 OS=Arabidopsis thaliana GN=RPS19B PE=2 SV=1	1	16.2536	16.3058	16.2332	16.2315	16.1185	16.0996	16.2043	16.1442	16.1124	16.0893	16.2004	16.143	16.1557	16.1495	16.2039	16.2301	16.2265	16.1427	16.1867	16.2894	16.2148	16.2284	16.2666	16.0663	16.0408	16.0163	16.1243	16.1464	16.2092	16.2665	16.2519	17	77.6	15.817	143	0	55.907	17.0582	17.1034	17.0124	17.0035	16.8809	16.8968	17.0054
Q9SGA6	Q9SGA6	40S ribosomal protein S19-1	RPS19A	sp|Q9SGA6|RS191_ARATH 40S ribosomal protein S19-1 OS=Arabidopsis thaliana GN=RPS19A PE=2 SV=1	1	21.3595	21.2746	21.2953	21.2755	21.1485	21.0841	21.1971	21.2154	21.1062	21.0816	21.2394	21.2002	21.1473	21.1879	21.1692	21.1447	21.0148	20.9892	21.0671	21.1064	21.0029	20.9827	20.9807	21.0138	21.0217	21.034	21.0453	20.8648	20.8444	20.8754	20.7258	17	77.6	15.828	143	0	179.94	21.6334	21.5415	21.5438	21.5168	21.3802	21.3506	21.4674
P11574	P11574	V-type proton ATPase subunit B1	VHA-B1	sp|P11574|VATB1_ARATH V-type proton ATPase subunit B1 OS=Arabidopsis thaliana GN=VHA-B1 PE=2 SV=2	1	20.4346	20.431	20.4021	20.2903	20.3978	20.3231	20.3105	20.356	20.2403	20.3537	20.3465	20.4322	20.4272	20.436	20.4155	20.4594	20.3083	20.2246	20.0764	20.4349	20.4491	20.3249	20.4585	20.7129	20.7238	20.8189	20.7237	20.6053	20.4799	20.4818	20.6208	31	77.4	54.107	486	0	323.31	20.1436	20.133	20.0856	19.9666	20.0646	20.0246	20.0159
Q9LRR9	Q9LRR9	Peroxisomal (S)-2-hydroxy-acid oxidase GLO1	GLO1	sp|Q9LRR9|GLO1_ARATH Peroxisomal (S)-2-hydroxy-acid oxidase GLO1 OS=Arabidopsis thaliana GN=GLO1 PE=1 SV=1	1	17.9493	17.971	18.0848	18.3188	17.9009	18.0901	17.9014	18.0025	18.3018	18.3184	18.2483	18.152	18.2137	18.1742	18.0636	18.1581	18.4919	18.5069	18.6285	18.1311	18.2608	18.1468	18.171	17.7724	17.6403	17.6279	17.8128	18.4717	18.4393	18.6566	18.497	25	77.4	40.341	367	0	116.71	17.9531	17.9678	18.0632	18.29	17.8625	18.0865	17.9017
P61845	P61845	50S ribosomal protein L23, chloroplastic	rpl23-A	sp|P61845|RK23_ARATH 50S ribosomal protein L23, chloroplastic OS=Arabidopsis thaliana GN=rpl23-A PE=3 SV=1	1	19.3081	19.0336	19.0795	19.1283	18.9769	18.9051	18.8889	18.9873	19.0624	18.9998	19.1188	18.959	18.9664	19.0956	19.0334	19.0587	19.039	19.1164	19.1864	19.104	19.014	19.0645	18.9381	18.9473	19.0145	19.0512	19.0367	19.0086	18.9126	19.0152	19.0049	10	77.4	10.789	93	0	134.21	19.3177	19.0362	19.0637	19.1053	18.9444	18.9073	18.895
O82629	O82629	V-type proton ATPase subunit G2	VHA-G2	sp|O82629|VATG2_ARATH V-type proton ATPase subunit G2 OS=Arabidopsis thaliana GN=VHA-G2 PE=1 SV=2	1	18.1951	17.8899	17.9815	17.7521	18.0363	17.9512	18.0331	17.9385	17.5593	17.6204	17.5854	17.6023	17.8946	17.8321	18.1025	17.9607	17.6535	17.7874	17.6725	17.9637	17.9544	17.7338	17.8251	18.2076	18.2389	18.3021	18.2122	17.9591	17.948	17.9273	17.9291	9	77.4	11.742	106	0	246.03	18.4022	18.09	18.1631	17.9266	18.2012	18.1508	18.2366
P51407	P51407	60S acidic ribosomal protein P2-1	RPP2A	sp|P51407|RLA21_ARATH 60S acidic ribosomal protein P2-1 OS=Arabidopsis thaliana GN=RPP2A PE=2 SV=2	1	19.4532	19.4156	19.5131	19.4558	19.3937	19.3476	19.2911	19.4076	19.3296	19.3003	19.4014	19.3238	19.3077	19.3419	19.4292	19.3849	19.303	19.4554	19.4768	19.3911	19.2015	19.1571	19.1673	19.1575	19.1911	19.205	19.2454	18.8411	18.9336	19.1364	18.8121	7	77.4	11.452	115	0	270.16	19.2705	19.2258	19.3048	19.2404	19.1687	19.1574	19.1048
Q9SLF7	Q9SLF7	60S acidic ribosomal protein P2-2	RPP2B	sp|Q9SLF7|RLA22_ARATH 60S acidic ribosomal protein P2-2 OS=Arabidopsis thaliana GN=RPP2B PE=1 SV=1	1	20.1057	20.0826	20.1489	20.1923	20.0572	20.0139	19.9917	20.1154	20.0958	20.0988	20.2209	20.164	19.9704	20.0757	20.1718	20.1238	19.8746	19.9461	20.007	20.1228	20.0085	19.977	19.984	19.942	19.9712	20.001	20.0045	19.7317	19.8168	19.9784	19.8097	7	77.4	11.444	115	0	323.31	20.272	20.2419	20.2897	20.326	20.1813	20.1728	20.1544
Q9SRT9;O22666	Q9SRT9	UDP-arabinopyranose mutase 1	RGP1	sp|Q9SRT9|RGP1_ARATH UDP-arabinopyranose mutase 1 OS=Arabidopsis thaliana GN=RGP1 PE=1 SV=1	2	17.4507	17.2887	17.2775	17.1168	17.7465	17.629	17.9468	17.644	17.2513	17.3161	17.4213	17.4619	17.2293	17.2117	17.2704	17.3345	17.0349	17.146	17.0864	17.5917	17.4796	17.4633	17.5524	17.3135	17.3963	17.3714	17.3166	17.818	17.651	17.7003	17.8094	24	77.3	40.629	357	0	181.81	16.9647	16.7956	16.766	16.5982	17.2183	17.1355	17.4572
Q9LYA5	Q9LYA5		F18O22_30	tr|Q9LYA5|Q9LYA5_ARATH Putative uncharacterized protein At5g14240 OS=Arabidopsis thaliana GN=F18O22_30 PE=2 SV=1	1	17.5469	17.5561	17.5438	17.6971	17.4402	17.4582	17.5015	17.5491	17.3926	17.2385	17.3182	17.3824	17.5782	17.5991	17.5893	17.6473	17.5263	17.573	17.6034	17.777	17.7829	17.8068	17.8577	17.6074	17.6145	17.5689	17.6879	17.5259	17.6598	17.7518	17.5734	18	77.3	28.749	256	0	178.57	17.7548	17.7569	17.7262	17.8724	17.6059	17.6587	17.7058
P30186	P30186	Proteasome subunit alpha type-7-A	PAD1	sp|P30186|PSA7A_ARATH Proteasome subunit alpha type-7-A OS=Arabidopsis thaliana GN=PAD1 PE=1 SV=1	1	16.9249	16.7929	16.7148	16.5683	16.9369	16.9352	17.1461	16.9055	16.4846	16.3079	16.404	16.4314	16.6688	16.6049	16.6456	16.6969	16.5717	16.5806	16.4423	16.8778	16.6977	16.7645	16.7668	16.8427	16.9072	16.9768	16.7754	16.7262	16.6751	16.5966	16.7233	15	77.2	27.337	250	0	73.876	16.5492	16.4102	16.3136	16.16	16.519	16.5521	16.7668
Q94CE4	Q94CE4	Beta carbonic anhydrase 4	BCA4	sp|Q94CE4|BCA4_ARATH Beta carbonic anhydrase 4 OS=Arabidopsis thaliana GN=BCA4 PE=1 SV=1	1	18.6774	18.7206	18.6629	18.6693	18.4741	18.6467	18.6962	18.6154	18.4854	18.2928	18.3541	18.2208	18.7619	18.6418	18.5548	18.6542	18.7567	18.7284	18.7412	18.7319	18.6887	18.7053	18.7769	18.5934	18.5673	18.6657	18.6683	18.8394	18.8333	18.6524	18.7874	18	77.1	30.836	280	0	255.2	18.7669	18.803	18.7269	18.7261	18.5214	18.7287	18.7821
P41916;Q8H156;P41917;Q9FLQ3	P41916;Q8H156;P41917	GTP-binding nuclear protein Ran-1;GTP-binding nuclear protein Ran-3;GTP-binding nuclear protein Ran-2	RAN1;RAN3;RAN2	sp|P41916|RAN1_ARATH GTP-binding nuclear protein Ran-1 OS=Arabidopsis thaliana GN=RAN1 PE=1 SV=1;sp|Q8H156|RAN3_ARATH GTP-binding nuclear protein Ran-3 OS=Arabidopsis thaliana GN=RAN3 PE=1 SV=2;sp|P41917|RAN2_ARATH GTP-binding nuclear protein Ran-2 OS=Arab	4	19.8729	19.8929	19.6212	19.5174	19.3761	19.477	19.6006	19.4418	19.2401	18.9628	18.9769	18.9772	19.5681	19.4707	19.2697	19.6276	19.6387	19.2916	19.12	19.2955	19.2936	19.2696	19.4406	18.9917	18.8863	18.922	18.9778	19.4597	19.4167	19.2409	19.4889	15	76.9	25.276	221	0	323.31	19.688	19.701	19.4109	19.2999	19.1491	19.2847	19.4121
Q9FT52	Q9FT52	ATP synthase subunit d, mitochondrial		sp|Q9FT52|ATP5H_ARATH ATP synthase subunit d, mitochondrial OS=Arabidopsis thaliana GN=At3g52300 PE=1 SV=3	1	18.9565	19.2719	19.2715	19.5839	19.3296	19.2323	19.1711	19.3472	20.0448	20.2979	20.1575	20.3407	19.6672	19.7818	19.6682	19.5343	19.5457	19.4893	19.6382	19.6819	19.8848	19.7797	19.6809	20.4176	20.4069	20.0261	20.1517	19.6301	19.5408	19.6628	19.5334	18	76.8	19.586	168	0	264.98	19.1964	19.5048	19.486	19.7912	19.5274	19.4648	19.4075
P17562	P17562	S-adenosylmethionine synthase 2	SAM2	sp|P17562|METK2_ARATH S-adenosylmethionine synthase 2 OS=Arabidopsis thaliana GN=SAM2 PE=1 SV=1	1	19.0728	19.214	19.0989	19.0942	19.1621	19.2373	19.0571	19.2576	18.5795	18.1669	18.2995	18.336	19.2005	19.1378	19.0659	19.08	19.2191	19.1078	19.0299	19.2764	19.2953	19.1503	19.3141	18.5517	18.4972	18.5693	18.5591	19.0415	19.1572	19.3413	19.1866	25	76.6	43.255	393	0	323.31	19.466	19.6002	19.4667	19.4548	19.5132	19.6232	19.4468
O81148;F4JJE5	O81148	Proteasome subunit alpha type-4-A	PAC1	sp|O81148|PSA4A_ARATH Proteasome subunit alpha type-4-A OS=Arabidopsis thaliana GN=PAC1 PE=1 SV=1	2	19.0862	18.9629	19.0014	18.9466	19.1044	19.1278	19.2833	19.106	18.8841	18.8208	18.9264	18.9434	18.9394	18.982	18.9902	19.0863	18.854	18.9042	18.8237	19.1267	19.0306	19.1116	19.1149	19.2027	19.3131	19.2509	19.1112	18.9911	18.9977	18.9056	18.9924	14	76.4	27.475	250	0	297.62	19.3638	19.2334	19.2536	19.1915	19.3398	19.3979	19.5573
Q9SMW7	Q9SMW7	Nascent polypeptide-associated complex subunit beta	btf3	sp|Q9SMW7|BTF3_ARATH Basic transcription factor 3 OS=Arabidopsis thaliana GN=BTF3 PE=1 SV=1	1	19.8941	19.8878	19.9196	19.8828	19.8331	19.833	19.8569	19.8945	19.7578	19.8195	19.9051	19.9013	19.7824	19.8598	19.948	19.8752	19.6548	19.7721	19.8332	19.831	19.694	19.7147	19.6414	19.8272	19.8468	19.8041	19.8982	19.418	19.4185	19.4723	19.3216	10	76.4	17.946	165	0	323.31	20.1426	20.1292	20.1426	20.0987	20.0394	20.074	20.1018
P10797;P10798	P10797;P10798	Ribulose bisphosphate carboxylase small chain 2B, chloroplastic;Ribulose bisphosphate carboxylase small chain 3B, chloroplastic	RBCS-2B;RBCS-3B	sp|P10797|RBS2B_ARATH Ribulose bisphosphate carboxylase small chain 2B, chloroplastic OS=Arabidopsis thaliana GN=RBCS-2B PE=2 SV=2;sp|P10798|RBS3B_ARATH Ribulose bisphosphate carboxylase small chain 3B, chloroplastic OS=Arabidopsis thaliana GN=RBCS-3B PE=2	2	21.9998	21.7811	21.7458	21.9411	21.8336	22.1864	22.2074	22.0554	21.7755	21.5647	21.8198	21.617	22.0885	22.0567	21.6948	22.0141	22.17	22.0963	22.0607	22.0161	22.1946	22.1241	22.2023	22.1658	22.1045	22.1873	22.4806	22.6918	22.7054	22.3524	22.5716	19	76.2	20.35	181	0	293.97	21.7683	21.5426	21.4889	21.6769	21.56	21.9475	21.9724
P10796	P10796	Ribulose bisphosphate carboxylase small chain 1B, chloroplastic	RBCS-1B	sp|P10796|RBS1B_ARATH Ribulose bisphosphate carboxylase small chain 1B, chloroplastic OS=Arabidopsis thaliana GN=RBCS-1B PE=2 SV=1	1	18.8653	18.5568	18.6835	18.7781	18.7859	19.0104	18.9973	18.9466	18.6133	18.4633	18.6264	18.4927	18.8757	18.83	18.702	18.8437	19.0194	18.9813	18.9073	19.0729	19.1033	19.0301	19.0975	18.946	18.926	18.9459	19.1283	19.2174	19.1723	19.1245	19.1683	18	76.2	20.286	181	0	91.465	18.9671	18.6515	18.7599	18.8473	18.8456	19.1048	19.0956
P19366	P19366	ATP synthase subunit beta, chloroplastic	atpB	sp|P19366|ATPB_ARATH ATP synthase subunit beta, chloroplastic OS=Arabidopsis thaliana GN=atpB PE=1 SV=2	1	21.0605	20.9854	20.9234	20.9651	20.9898	21.1549	20.9843	20.9607	21.2069	21.2509	21.2066	21.1705	21.0886	21.0976	21.078	21.0244	21.3563	21.1803	21.1616	20.9603	21.1971	21.1292	21.104	21.2388	21.2556	21.0049	21.1153	21.3704	21.3854	21.2525	21.3181	34	76.1	53.933	498	0	323.31	21.0203	20.9382	20.8578	20.8922	20.9074	21.1073	20.9405
Q9FJ95	Q9FJ95	Sorbitol dehydrogenase	SDH	sp|Q9FJ95|DHSO_ARATH Sorbitol dehydrogenase OS=Arabidopsis thaliana GN=SDH PE=1 SV=1	1	18.6657	18.7098	18.6626	18.7274	18.5639	18.6687	18.6253	18.7491	18.4925	18.0217	18.1207	18.0499	18.8246	18.6494	18.6001	18.7579	18.8851	18.8085	18.712	18.9011	18.9648	18.9269	19.0552	18.307	18.289	18.3622	18.4163	18.8843	19.0511	18.953	19.0408	19	76.1	39.255	364	0	303.56	18.6952	18.7322	18.6667	18.7243	18.5512	18.6908	18.6512
Q9SK39	Q9SK39	Probable steroid-binding protein 3	MP3	sp|Q9SK39|SBP3_ARATH Probable steroid-binding protein 3 OS=Arabidopsis thaliana GN=MP3 PE=1 SV=1	1	16.3604	16.4157	16.3964	16.4471	16.4346	16.3145	16.3235	16.4016	16.6859	16.6543	16.6351	16.7902	16.6935	16.7299	16.5844	16.7896	16.2536	16.3816	16.3367	16.4857	16.5465	16.5371	16.5373	16.861	16.8026	16.8332	16.8525	16.5375	16.6257	16.5106	16.3667	7	76	11.031	100	0	88.77	16.7031	16.7513	16.7136	16.7571	16.735	16.6498	16.6626
P29517	P29517	Tubulin beta-9 chain	TUBB9	sp|P29517|TBB9_ARATH Tubulin beta-9 chain OS=Arabidopsis thaliana GN=TUBB9 PE=1 SV=1	1	19.1239	19.1593	19.1703	19.2741	19.012	19.068	19.0303	19.163	18.6107	18.0938	18.25	18.1878	19.2183	19.2079	19.081	19.1526	19.0813	19.1289	19.0427	19.3255	19.3205	19.2683	19.3625	18.9288	18.7919	18.8619	18.9934	19.2203	19.3588	19.3105	19.2807	27	75.7	49.657	444	0	323.31	19.0139	19.0422	19.0348	19.1315	18.8598	18.9505	18.9167
O64740	O64740	Protein transport protein SEC13 homolog B	SEC13B	sp|O64740|SC13B_ARATH Protein transport protein SEC13 homolog B OS=Arabidopsis thaliana GN=SEC13B PE=1 SV=1	1	18.1703	18.1451	18.0807	18.0456	18.0724	18.1749	18.1555	18.2216	17.4644	17.1022	17.1767	17.2431	18.0252	17.9452	17.9304	18.0255	17.9564	17.8477	17.7284	18.2228	18.2689	18.1807	18.3548	17.45	17.393	17.4701	17.4325	18.3488	18.3283	18.3076	18.406	18	75.5	32.642	302	0	265.24	18.168	18.1358	18.053	18.0107	18.0279	18.1652	18.1496
Q8GXE7	Q8GXE7			tr|Q8GXE7|Q8GXE7_ARATH At5g15320 OS=Arabidopsis thaliana GN=At5g15320 PE=2 SV=1	1	15.7998	15.6651	15.8589	15.8333	15.7312	15.65	15.7086	15.7337	15.9433	15.9799	15.9659	15.9767	15.7525	15.8526	15.8264	15.7648	15.9105	16.0042	15.8034	15.7802	15.7922	15.8211	15.7401	15.96	16.0397	15.9227	15.9373	15.9815	15.8889	15.8357	15.9378	3	75.5	5.6026	53	0	20.781	15.9327	15.7911	15.9664	15.9337	15.822	15.7756	15.838
Q05431	Q05431	L-ascorbate peroxidase 1, cytosolic	APX1	sp|Q05431|APX1_ARATH L-ascorbate peroxidase 1, cytosolic OS=Arabidopsis thaliana GN=APX1 PE=1 SV=2	1	19.3703	19.3697	19.1528	19.0753	19.4948	19.4736	19.3748	19.3611	18.9972	18.6103	18.6316	18.7571	19.1002	19.0974	19.0313	19.1203	19.5096	19.0561	18.9263	19.0786	19.2321	18.9339	18.9444	18.8165	18.6476	18.6818	18.6844	19.743	19.6883	19.2596	19.5593	20	75.2	27.561	250	0	323.31	19.3424	19.3349	19.0995	19.0148	19.4247	19.4384	19.3433
O24616	O24616	Proteasome subunit alpha type-7-B	PAD2	sp|O24616|PSA7B_ARATH Proteasome subunit alpha type-7-B OS=Arabidopsis thaliana GN=PAD2 PE=1 SV=2	1	19.1793	19.056	18.9482	18.8208	19.1759	19.2	19.5181	19.204	18.7489	18.6887	18.7305	18.7929	18.9067	18.8458	18.9908	19.0634	18.807	18.819	18.7239	19.0484	18.9353	19.0128	18.9927	19.0692	19.1728	19.1804	19.072	18.9516	18.9929	18.8508	18.9301	15	75.2	27.324	250	0	182.89	19.3172	19.1869	19.0606	18.9261	19.2716	19.3305	19.6524
Q9SAJ4	Q9SAJ4	Phosphoglycerate kinase	T8K14.3	tr|Q9SAJ4|Q9SAJ4_ARATH Phosphoglycerate kinase OS=Arabidopsis thaliana GN=T8K14.3 PE=1 SV=1	1	20.5953	20.5956	20.5258	20.4414	20.4259	20.5828	20.5056	20.6004	19.8935	19.5666	19.6491	19.7479	20.5148	20.3406	20.3333	20.3679	20.485	20.3692	20.1125	20.3521	20.5202	20.2224	20.4187	20.0292	19.8646	20.0231	20.1776	20.441	20.4092	20.1479	20.204	27	75.1	42.131	401	0	323.31	20.4817	20.475	20.3868	20.2952	20.2701	20.4618	20.3885
Q8H0Y1	Q8H0Y1	Outer envelope pore protein 24B, chloroplastic	OEP24B	sp|Q8H0Y1|OP24B_ARATH Outer envelope pore protein 24B, chloroplastic OS=Arabidopsis thaliana GN=OEP24B PE=2 SV=1	1	17.7821	17.9501	17.8296	17.8439	18.0084	17.9861	17.928	17.874	18.2426	18.3831	18.2789	18.346	18.0651	18.0376	18.0164	17.9314	18.0124	17.9777	18.0475	17.7717	17.9409	18.0808	17.9746	18.409	18.4106	18.3411	18.2983	18.1971	18.0967	18.0704	18.1957	15	75.1	23.41	213	0	109.97	17.6535	17.8146	17.6756	17.6828	17.8377	17.8501	17.796
Q01474	Q01474	GTP-binding protein SAR1B	SAR1B	sp|Q01474|SAR1B_ARATH GTP-binding protein SAR1B OS=Arabidopsis thaliana GN=SAR1B PE=1 SV=1	1	17.8218	17.9145	17.7652	17.7047	17.9273	17.8426	17.7244	17.721	17.8393	17.8356	17.9103	17.8886	17.8118	17.7264	17.7282	17.6841	17.9302	17.7347	17.4879	17.5208	17.7336	17.6161	17.5486	18.0356	18.1193	18.1009	17.9932	17.7512	17.3662	17.5354	17.5916	11	75.1	21.986	193	0	166.29	17.7158	17.8014	17.6337	17.5661	17.7791	17.7291	17.6148
P24636	P24636	Tubulin beta-4 chain	TUBB4	sp|P24636|TBB4_ARATH Tubulin beta-4 chain OS=Arabidopsis thaliana GN=TUBB4 PE=2 SV=2	1	18.6998	18.6559	18.7275	18.7777	18.5974	18.6091	18.5981	18.7007	18.2621	17.8576	17.9438	17.8899	18.7297	18.7727	18.684	18.7405	18.4666	18.6078	18.514	18.9286	18.8949	18.8387	18.9178	18.5142	18.3688	18.393	18.51	18.6534	18.8729	18.8585	18.8295	27	75	49.823	444	0	323.31	18.2802	18.2292	18.2825	18.3255	18.1357	18.1821	18.1749
O82221	O82221	Probable small nuclear ribonucleoprotein G		sp|O82221|RUXG_ARATH Probable small nuclear ribonucleoprotein G OS=Arabidopsis thaliana GN=At2g23930 PE=2 SV=1	1	17.0328	17.0183	17.044	16.9895	17.0653	17.0903	17.1299	17.094	16.7615	16.7324	16.8345	16.8268	16.9456	16.9479	17.1545	17.0303	16.6571	16.8894	16.8337	17.0122	16.9225	16.8934	16.9104	16.5197	16.4622	16.6287	16.5912	16.8786	16.763	16.9634	16.7186	5	75	8.8391	80	0	125.54	16.6979	16.6765	16.6837	16.622	16.6883	16.7481	16.7914
Q1G3G5	Q1G3G5		At5g55125	tr|Q1G3G5|Q1G3G5_ARATH Ribosomal protein L31 OS=Arabidopsis thaliana GN=At5g55125 PE=4 SV=1	1	15.2144	15.2338	15.2275	15.178	15.2239	15.1425	15.2388	15.1905	15.3613	15.5501	15.5987	15.6045	15.1564	15.1584	15.358	15.1936	15.2354	15.272	15.2608	15.093	15.2411	15.3212	15.1926	15.4069	15.501	15.3448	15.3443	14.7948	14.6575	14.8624	14.7963	4	75	8.9552	76	0	75.277	15.2854	15.2977	15.2731	15.2164	15.2527	15.2061	15.3062
P10896	P10896	Ribulose bisphosphate carboxylase/oxygenase activase, chloroplastic	RCA	sp|P10896|RCA_ARATH Ribulose bisphosphate carboxylase/oxygenase activase, chloroplastic OS=Arabidopsis thaliana GN=RCA PE=1 SV=2	1	21.5208	21.4246	21.4307	21.4443	21.6187	21.7617	21.539	21.6587	21.2091	21.0962	21.1499	21.3509	21.5167	21.538	21.5341	21.4581	21.5624	21.3631	21.3191	21.5156	21.6852	21.5013	21.5298	21.1078	20.9585	21.0546	21.1675	22.0365	21.9729	22.0071	21.9339	34	74.9	51.981	474	0	323.31	21.6666	21.5634	21.5511	21.5575	21.7223	21.9001	21.6812
Q9SJQ9	Q9SJQ9	Fructose-bisphosphate aldolase	At2g36460	tr|Q9SJQ9|Q9SJQ9_ARATH Fructose-bisphosphate aldolase OS=Arabidopsis thaliana GN=At2g36460 PE=2 SV=1	1	17.7214	17.6864	17.6657	17.7648	17.7084	17.7681	17.8648	17.7539	18.171	18.4124	18.3609	18.4127	17.7482	17.7512	17.6332	17.8065	17.9612	17.8555	17.7358	17.5131	17.5358	17.6805	17.584	17.8157	17.7767	17.965	17.8027	17.825	17.7804	17.8106	17.8385	23	74.9	38.386	358	0	323.31	17.7099	17.6679	17.6288	17.7207	17.6547	17.7492	17.8497
O04450;Q67ZE4	O04450	T-complex protein 1 subunit epsilon	CCT5	sp|O04450|TCPE_ARATH T-complex protein 1 subunit epsilon OS=Arabidopsis thaliana GN=CCT5 PE=1 SV=1	2	20.3224	20.2614	20.2556	20.2854	20.4025	20.4078	20.4532	20.408	20.4116	20.3919	20.399	20.2655	20.3073	20.2511	20.2615	20.2983	20.2494	20.3512	20.434	20.5073	20.3902	20.5798	20.6425	20.1445	20.1661	20.1896	20.1622	20.2137	20.4185	20.4902	20.3698	34	74.8	59.384	535	0	323.31	20.4539	20.3858	20.3616	20.3843	20.4918	20.5318	20.5811
P48347;F4I1B7	P48347	14-3-3-like protein GF14 epsilon	GRF10	sp|P48347|14310_ARATH 14-3-3-like protein GF14 epsilon OS=Arabidopsis thaliana GN=GRF10 PE=1 SV=1	2	20.001	20.0707	19.8772	19.7789	19.9384	19.9531	20.0462	19.9049	19.5887	19.3307	19.3351	19.3075	19.977	19.891	19.8186	19.8999	19.8396	19.5926	19.4817	19.7841	19.922	19.7474	19.8717	19.8116	19.8023	19.8026	19.7812	20.0663	19.9058	19.7573	19.8905	18	74.8	28.915	254	0	268.97	19.9235	19.9862	19.7742	19.6687	19.8187	19.8682	19.9651
Q9FPJ4	Q9FPJ4	Ras-related protein RABD2b	RABD2B	sp|Q9FPJ4|RAD2B_ARATH Ras-related protein RABD2b OS=Arabidopsis thaliana GN=RABD2B PE=2 SV=1	1	15.967	16.1004	15.8563	15.866	16.2597	16.1619	16.0678	15.964	16.2633	16.4756	16.4431	16.4496	16.1133	16.0306	16.0452	16.0036	16.0191	15.9353	15.9205	15.9305	15.9608	15.9177	15.8278	16.5403	16.647	16.6327	16.4837	15.8283	15.741	15.9121	15.912	13	74.8	22.313	202	0	35.015	15.5218	15.6482	15.3857	15.3882	15.7723	15.7093	15.619
Q9SEH3	Q9SEH3	Ras-related protein RABD2c	RABD2C	sp|Q9SEH3|RAD2C_ARATH Ras-related protein RABD2c OS=Arabidopsis thaliana GN=RABD2C PE=2 SV=1	1	19.064	19.1648	19.0801	19.0768	19.1521	19.1391	19.161	19.1556	19.2079	19.3666	19.3381	19.3205	19.0989	19.1402	19.1191	19.1158	19.2032	19.2051	19.1828	19.1133	19.2402	19.1572	19.0748	19.6483	19.7141	19.7253	19.6396	19.162	18.9826	19.1519	19.1452	13	74.8	22.318	202	0	192.75	19.402	19.4957	19.3927	19.3822	19.4479	19.4697	19.4954
O04331;Q9LY99	O04331	Prohibitin-3, mitochondrial	PHB3	sp|O04331|PHB3_ARATH Prohibitin-3, mitochondrial OS=Arabidopsis thaliana GN=PHB3 PE=1 SV=1	2	18.3114	18.5159	18.4751	18.5314	18.5339	18.4642	18.3848	18.4359	19.0713	19.3395	19.1646	19.4085	18.6612	18.6718	18.6343	18.5861	18.7461	18.6188	18.7189	18.4771	18.625	18.6606	18.591	19.1819	19.2312	19.0174	19.0394	18.666	18.5163	18.548	18.5661	15	74.7	30.399	277	0	323.31	18.3883	18.5857	18.5265	18.5756	18.5686	18.5336	18.4582
Q9XEX2;O22711	Q9XEX2	Peroxiredoxin-2B	PRXIIB	sp|Q9XEX2|PRX2B_ARATH Peroxiredoxin-2B OS=Arabidopsis thaliana GN=PRXIIB PE=1 SV=1	2	17.1635	17.1422	17.0337	16.8994	17.1771	17.2137	17.3065	17.1796	16.8949	16.8782	16.8375	16.9504	16.8962	16.9161	16.9315	16.9529	17.0118	16.7493	16.7105	16.868	16.8793	16.7642	16.7872	16.6812	16.644	16.6472	16.6538	17.1314	17.0554	16.9404	17.0508	6	74.7	17.428	162	0	125.41	16.9076	16.8793	16.7524	16.6109	16.879	16.9504	17.0471
Q38900	Q38900	Peptidyl-prolyl cis-trans isomerase CYP19-1	CYP19-1	sp|Q38900|CP19A_ARATH Peptidyl-prolyl cis-trans isomerase CYP19-1 OS=Arabidopsis thaliana GN=CYP19-1 PE=1 SV=1	1	18.8085	18.7503	18.7436	18.5829	18.8133	18.795	18.753	18.7563	18.8405	18.6747	18.642	18.7472	18.6443	18.6125	18.7393	18.7289	18.6461	18.5892	18.3636	18.8572	18.8564	18.5985	18.8032	18.3412	18.2559	18.3526	18.2821	18.6913	18.7097	18.6499	18.5954	10	74.6	18.492	173	0	323.31	18.7915	18.7262	18.7011	18.5332	18.754	18.7705	18.7324
Q8LBI1	Q8LBI1	60S ribosomal protein L5-1	ATL5	sp|Q8LBI1|RL51_ARATH 60S ribosomal protein L5-1 OS=Arabidopsis thaliana GN=ATL5 PE=2 SV=2	1	21.3471	21.3427	21.3197	21.3388	21.2276	21.2	21.2613	21.3263	21.1826	21.1606	21.2574	21.2337	21.2053	21.2344	21.2951	21.2118	21.1207	21.141	21.2249	21.1248	21.08	21.0369	21.0758	21.0723	21.103	21.1024	21.1707	20.9185	20.9748	21.0205	20.8652	23	74.4	34.358	301	0	323.31	21.2192	21.2078	21.1664	21.1782	21.0576	21.0647	21.1298
P31265	P31265	Translationally-controlled tumor protein homolog	TCTP	sp|P31265|TCTP1_ARATH Translationally-controlled tumor protein 1 OS=Arabidopsis thaliana GN=TCTP1 PE=1 SV=2	1	18.8257	18.8343	18.6084	18.5845	18.8474	18.9421	18.7563	18.6842	18.5797	18.1714	18.2428	18.3062	18.6635	18.62	18.6222	18.7052	18.7689	18.618	18.4665	18.5886	18.6326	18.4445	18.5347	18.5545	18.5173	18.5372	18.503	18.6477	18.6451	18.6093	18.5006	11	74.4	18.91	168	0	279.32	18.8941	18.8957	18.6513	18.6203	18.8736	19.003	18.8211
P54609	P54609	Cell division control protein 48 homolog A	CDC48A	sp|P54609|CD48A_ARATH Cell division control protein 48 homolog A OS=Arabidopsis thaliana GN=CDC48A PE=1 SV=1	1	20.5143	20.5749	20.5511	20.5743	20.7969	20.8596	20.8453	20.762	20.159	19.9942	20.0762	20.1205	20.5404	20.5486	20.5557	20.5772	20.4655	20.4767	20.2635	20.7165	20.7136	20.6161	20.7506	20.3292	20.3384	20.3835	20.3592	20.579	20.6682	20.6623	20.6209	52	74.3	89.392	809	0	323.31	20.5877	20.6413	20.5991	20.6151	20.8282	20.9256	20.9151
Q9SSB5;Q9SSB4;Q0WQM8	Q9SSB5	26S protease regulatory subunit 7 homolog A	RPT1A	sp|Q9SSB5|PRS7A_ARATH 26S protease regulatory subunit 7 homolog A OS=Arabidopsis thaliana GN=RPT1A PE=1 SV=1	3	20.6151	20.6182	20.5806	20.579	20.5866	20.5851	20.7012	20.6231	20.3607	20.2577	20.3496	20.2875	20.5103	20.5483	20.4992	20.5938	20.4079	20.5219	20.4893	20.6768	20.5805	20.6048	20.6735	20.4922	20.5372	20.568	20.5269	20.4494	20.5534	20.5954	20.5453	35	74.2	47.803	426	0	323.31	20.6908	20.6869	20.6309	20.6221	20.6202	20.6534	20.7734
P49209	P49209	60S ribosomal protein L9-1	RPL9B	sp|P49209|RL91_ARATH 60S ribosomal protein L9-1 OS=Arabidopsis thaliana GN=RPL9B PE=1 SV=3	1	21.711	21.6747	21.66	21.6386	21.5658	21.5285	21.5911	21.6482	21.514	21.4992	21.5743	21.5558	21.5548	21.6066	21.6051	21.5421	21.3571	21.4184	21.5069	21.4516	21.3603	21.3719	21.3794	21.383	21.361	21.3591	21.3819	21.2436	21.2677	21.264	21.0762	18	74.2	22.017	194	0	323.31	21.9145	21.8711	21.8381	21.8095	21.7271	21.7246	21.7911
Q8LGC6	Q8LGC6	Nascent polypeptide-associated complex subunit alpha-like protein 5		sp|Q8LGC6|NACA5_ARATH Nascent polypeptide-associated complex subunit alpha-like protein 5 OS=Arabidopsis thaliana GN=At1g33040 PE=2 SV=2	1	18.5788	18.5087	18.6008	18.5565	18.4798	18.4339	18.4462	18.4974	18.3438	18.2104	18.312	18.3659	18.4401	18.5248	18.6676	18.5732	18.3833	18.463	18.5825	18.3912	18.2901	18.315	18.1773	18.4265	18.4113	18.3354	18.4052	17.8698	17.9123	18.0788	17.853	12	74.2	22.78	209	0	276.58	18.3338	18.2566	18.3303	18.2789	18.1926	18.1814	18.1976
P42763	P42763	Dehydrin ERD14	ERD14	sp|P42763|ERD14_ARATH Dehydrin ERD14 OS=Arabidopsis thaliana GN=ERD14 PE=1 SV=1	1	18.8414	19.1363	18.9187	18.9086	19.185	19.0839	19.0264	18.98	18.8982	19.1078	19.0638	18.9923	19.3666	19.1679	19.0563	19.1468	19.0083	18.9961	18.921	18.9819	19.1148	19.0244	18.9745	19.5306	19.4889	19.2612	19.4852	19.0491	19.0465	18.8013	18.9755	14	74.1	20.786	185	0	195.38	18.8082	19.0961	18.8601	18.8428	19.1097	19.0433	18.9897
Q9FNP8	Q9FNP8	40S ribosomal protein S19-3	RPS19C	sp|Q9FNP8|RS193_ARATH 40S ribosomal protein S19-3 OS=Arabidopsis thaliana GN=RPS19C PE=2 SV=1	1	18.5485	18.5054	18.569	18.5583	18.4648	18.4044	18.5217	18.4911	18.4058	18.4224	18.3933	18.4336	18.4341	18.4958	18.6158	18.5276	18.3387	18.3778	18.4684	18.4743	18.3389	18.2896	18.3339	18.3196	18.3059	18.3337	18.3245	18.1529	18.1624	18.2056	18.098	14	74.1	15.697	143	0	315.32	18.1588	18.1086	18.1539	18.136	18.0329	18.0072	18.1284
Q9SA73	Q9SA73	Obg-like ATPase 1	T5I8.3	sp|Q9SA73|OLA1_ARATH Obg-like ATPase 1 OS=Arabidopsis thaliana GN=YchF1 PE=1 SV=1	1	20.5024	20.4306	20.4132	20.2259	20.5289	20.4486	20.5718	20.4385	20.2472	20.1132	20.1578	20.2303	20.1681	20.1583	20.3533	20.2791	20.2431	20.1721	20.1076	20.1889	20.0511	20.0416	20.0786	19.9209	19.9497	20.0198	19.9834	20.0914	20.0673	19.9877	20.1259	26	73.9	44.471	394	0	323.31	20.4333	20.3544	20.3186	20.1241	20.4176	20.3721	20.4991
Q9M1R2;REV__Q9FUT3;REV__Q9M0G9	Q9M1R2		T17J13.80	sp|Q9M1R2|SYPC_ARATH Proline--tRNA ligase, cytoplasmic OS=Arabidopsis thaliana GN=At3g62120 PE=2 SV=1	3	20.94	20.8602	20.9674	20.9483	20.5263	20.6347	20.4878	20.7525	20.7165	20.2906	20.5335	20.3453	20.9374	20.867	20.9372	20.8519	20.6739	20.702	20.8076	20.7534	20.7132	20.6999	20.786	20.4365	20.3771	20.41	20.4758	20.8809	20.9852	20.9598	20.9954	40	73.8	60.755	530	0	323.31	21.1101	21.0232	21.112	21.0858	20.6541	20.7973	20.6543
Q42134	Q42134	Proteasome subunit alpha type-5-B	PAE2	sp|Q42134|PSA5B_ARATH Proteasome subunit alpha type-5-B OS=Arabidopsis thaliana GN=PAE2 PE=1 SV=2	1	18.6961	18.5042	18.51	18.2809	18.6526	18.6125	18.8727	18.5631	18.2128	18.1012	18.2325	18.245	18.3282	18.2735	18.3772	18.447	18.1485	18.2212	18.1905	18.4985	18.3773	18.4225	18.4383	18.5422	18.6209	18.6237	18.5296	18.3453	18.348	18.2441	18.2939	15	73.8	25.977	237	0	319.75	18.2961	18.0972	18.0846	17.8483	18.2105	18.2051	18.4692
Q94JQ4	Q94JQ4	Reactive Intermediate Deaminase A, chloroplastic	RIDA	sp|Q94JQ4|RIDA_ARATH Reactive Intermediate Deaminase A, chloroplastic OS=Arabidopsis thaliana GN=RIDA PE=1 SV=1	1	17.1136	16.9992	17.035	17.0986	17.1729	17.1149	17.1166	17.0789	17.4806	17.4672	17.3677	17.4527	17.247	17.2592	17.2985	17.2814	17.3692	17.384	17.2498	17.1592	17.2262	17.3435	17.1271	17.3741	17.2884	17.2788	17.197	17.3236	17.2087	17.3703	17.2146	12	73.8	19.816	187	0	71.977	16.8891	16.7676	16.7849	16.8414	16.9062	16.8829	16.8885
Q6NL24	Q6NL24		ECHIA	sp|Q6NL24|ECH1P_ARATH Probable enoyl-CoA hydratase 1, peroxisomal OS=Arabidopsis thaliana GN=ECHIA PE=1 SV=1	1	18.7279	18.5278	18.6179	18.5656	18.7601	18.5697	18.568	18.6729	18.6211	18.8109	18.6503	18.5742	18.3582	18.3787	18.5024	18.4262	18.4235	18.6591	18.7283	18.6915	18.5532	18.6951	18.7509	18.3668	18.3767	18.3702	18.4054	18.6047	18.7252	18.6682	18.6856	19	73.6	28.818	265	0	174.79	18.9056	18.6985	18.7702	18.7107	18.8957	18.7399	18.7421
Q9SZN1	Q9SZN1	V-type proton ATPase subunit B2	VHA-B2	sp|Q9SZN1|VATB2_ARATH V-type proton ATPase subunit B2 OS=Arabidopsis thaliana GN=VHA-B2 PE=1 SV=1	1	17.3211	17.2872	17.3122	17.1418	17.2585	17.1981	17.1923	17.2218	17.0663	17.1	17.1165	17.222	17.229	17.2785	17.38	17.3803	17.23	17.078	16.842	17.276	17.253	17.1045	17.179	17.6869	17.6758	17.7746	17.5683	17.4592	17.2895	17.3207	17.3951	31	73.5	54.304	487	0	84.826	17.3208	17.2798	17.2864	17.1088	17.216	17.1904	17.1883
Q945M1	Q945M1	NADH dehydrogenase [ubiquinone] 1 beta subcomplex subunit 9	CIB22	sp|Q945M1|NDUB9_ARATH NADH dehydrogenase [ubiquinone] 1 beta subcomplex subunit 9 OS=Arabidopsis thaliana GN=CIB22 PE=1 SV=1	1	16.874	16.7443	16.9037	16.9297	16.8772	16.9014	16.813	16.8831	17.0984	17.0157	16.9523	17.1015	16.7826	16.8756	16.9258	16.8569	16.8287	16.775	16.8132	16.9362	17.0814	17.0601	16.9915	17.2201	17.2706	17.1086	17.1645	16.9671	16.9718	16.9229	16.9213	9	73.5	13.616	117	0	89.103	17.506	17.3693	17.5103	17.5292	17.4671	17.526	17.4414
Q9SPE6;Q9LXZ5	Q9SPE6	Alpha-soluble NSF attachment protein 2	ASNAP2	sp|Q9SPE6|SNAA2_ARATH Alpha-soluble NSF attachment protein 2 OS=Arabidopsis thaliana GN=ASNAP2 PE=1 SV=1	2	18.9788	19.0671	19.0364	19.0455	19.0935	19.0523	18.9789	19.0302	19.0952	19.1614	19.1332	19.1816	19.1683	19.1453	19.0994	19.0956	19.017	19.0409	18.9871	19.0378	19.0975	19.1269	18.9963	19.4944	19.4955	19.4985	19.4433	19.0228	18.9668	19.0474	19.0351	20	73.4	32.755	289	0	282.52	19.1232	19.2044	19.1554	19.1572	19.1957	19.1893	19.1197
O81149	O81149	Proteasome subunit alpha type-5-A	PAE1	sp|O81149|PSA5A_ARATH Proteasome subunit alpha type-5-A OS=Arabidopsis thaliana GN=PAE1 PE=1 SV=1	1	13.4043	13.4377	13.1832	13.0398	13.1945	13.3052	13.6841	13.3759	12.9407	12.8977	12.9111	12.9805	13.1599	12.9695	13.2046	13.2031	13.2735	12.8353	13.0942	12.7837	13.0079	13.0238	13.3416	13.1909	13.0455	13.1406	12.9767	13.0769	12.9888	13.0635	12.873	14	73.4	25.947	237	0	44.273	13.9048	13.9311	13.6582	13.5077	13.6528	13.7983	14.181
Q9ASR0;Q56YW9	Q9ASR0;Q56YW9	Tubulin beta-3 chain;Tubulin beta-2 chain	TUBB3;TUBB2	sp|Q9ASR0|TBB3_ARATH Tubulin beta-3 chain OS=Arabidopsis thaliana GN=TUBB3 PE=2 SV=2;sp|Q56YW9|TBB2_ARATH Tubulin beta-2 chain OS=Arabidopsis thaliana GN=TUBB2 PE=2 SV=2	2	21.1766	21.2395	21.2164	21.3228	21.1143	21.1429	21.0839	21.1948	20.9466	20.6281	20.7361	20.6345	21.2905	21.266	21.1051	21.2245	21.2147	21.2588	21.2277	21.3746	21.3525	21.4323	21.4478	21.1376	21.0504	21.0554	21.1551	21.2028	21.3609	21.3809	21.3561	28	73.3	50.733	450	0	323.31	21.3703	21.4261	21.3847	21.4839	21.2659	21.3292	21.2741
Q8L4A7	Q8L4A7	Proteasome subunit alpha type-2-B	PAB2	sp|Q8L4A7|PSA2B_ARATH Proteasome subunit alpha type-2-B OS=Arabidopsis thaliana GN=PAB2 PE=1 SV=1	1	19.641	19.4638	19.3942	19.2665	19.6208	19.6304	19.9456	19.619	19.2257	19.1862	19.2235	19.258	19.3249	19.2785	19.3349	19.4409	19.2518	19.2396	19.1252	19.5557	19.4457	19.4679	19.5231	19.5681	19.6798	19.6543	19.5117	19.4716	19.4923	19.2904	19.4272	13	73.2	25.733	235	0	323.31	19.5086	19.3244	19.2364	19.1015	19.4462	19.4906	19.8096
Q9LQ04	Q9LQ04	Bifunctional dTDP-4-dehydrorhamnose 3,5-epimerase/dTDP-4-dehydrorhamnose reductase	NRS/ER	sp|Q9LQ04|RMLCD_ARATH Bifunctional dTDP-4-dehydrorhamnose 3,5-epimerase/dTDP-4-dehydrorhamnose reductase OS=Arabidopsis thaliana GN=NRS/ER PE=1 SV=1	1	19.0903	19.044	18.9165	18.7042	19.1705	19.2218	19.1584	19.153	18.4282	18.3767	18.3697	18.3795	18.7894	18.822	18.8654	18.8543	18.6308	18.5393	18.4448	19.3182	19.3888	19.0244	19.2761	18.4941	18.4494	18.5143	18.4487	19.4582	19.3854	19.3692	19.4128	19	73.1	33.597	301	0	323.31	19.0232	18.97	18.824	18.6046	19.0612	19.1473	19.0878
P42742	P42742	Proteasome subunit beta type-1	PBF1	sp|P42742|PSB1_ARATH Proteasome subunit beta type-1 OS=Arabidopsis thaliana GN=PBF1 PE=1 SV=2	1	19.0488	18.8521	18.7698	18.5897	19.0574	19.0309	19.3422	19.0127	18.5629	18.5077	18.5809	18.5927	18.7038	18.6262	18.7798	18.7936	18.5533	18.6161	18.4946	18.8719	18.7631	18.8527	18.8289	18.9453	19.0601	19.0119	18.9021	18.7723	18.8134	18.6699	18.7745	14	73.1	24.644	223	0	289.58	19.1186	18.9149	18.8141	18.6268	19.0849	19.0933	19.4084
P42798;O80646	P42798	40S ribosomal protein S15a-1	RPS15AA	sp|P42798|R15A1_ARATH 40S ribosomal protein S15a-1 OS=Arabidopsis thaliana GN=RPS15AA PE=2 SV=2	2	19.9362	19.8711	19.8936	19.8494	19.8021	19.7018	19.7877	19.843	19.7149	19.6559	19.7745	19.725	19.7556	19.757	19.749	19.6563	19.6487	19.6607	19.6944	19.7202	19.5852	19.5938	19.5897	19.6104	19.5835	19.6217	19.6014	19.5115	19.4284	19.5226	19.3575	11	73.1	14.804	130	0	136.04	20.2179	20.1457	20.1498	20.0984	20.0415	19.976	20.0658
Q9LX88	Q9LX88	40S ribosomal protein S15a-4	RPS15AD	sp|Q9LX88|R15A4_ARATH 40S ribosomal protein S15a-4 OS=Arabidopsis thaliana GN=RPS15AD PE=2 SV=3	1	16.5758	16.5185	16.4898	16.5073	16.4916	16.5183	16.5978	16.5368	16.6024	16.652	16.5822	16.6862	16.5292	16.5461	16.582	16.5359	16.4749	16.5298	16.6177	16.4791	16.4935	16.4509	16.4191	16.5002	16.5923	16.5738	16.6708	16.4527	16.4335	16.5163	16.4458	11	73.1	14.774	130	0	82.126	16.3059	16.2415	16.1944	16.2047	16.1794	16.2409	16.3243
Q9SL42	Q9SL42	Peptidyl-prolyl cis-trans isomerase Pin1	PIN1	sp|Q9SL42|PIN1_ARATH Peptidyl-prolyl cis-trans isomerase Pin1 OS=Arabidopsis thaliana GN=PIN1 PE=1 SV=1	1	16.8352	16.8531	16.8287	16.9652	16.7545	16.6904	16.6829	16.7239	17.1877	17.2352	17.257	17.3198	16.9021	16.9396	16.903	16.9915	16.9176	16.8817	16.9288	16.8502	16.8992	16.9347	16.8899	16.8654	16.8445	16.8234	16.9123	16.7895	16.8101	16.9392	16.8144	9	73.1	13.015	119	0	42.1	16.7783	16.7892	16.7464	16.8757	16.6554	16.626	16.6224
Q94BQ2	Q94BQ2	26S protease regulatory subunit 8 homolog B	RPT6B	sp|Q94BQ2|PRS8B_ARATH 26S protease regulatory subunit 8 homolog B OS=Arabidopsis thaliana GN=RPT6B PE=1 SV=1	1	15.3896	15.4468	15.5347	15.6233	15.4142	15.6329	15.7097	15.5627	15.3984	15.3927	15.3547	15.3899	15.613	15.649	15.5376	15.6314	15.6403	15.7143	15.8087	15.7425	15.7373	15.7381	15.7878	15.6733	15.6288	15.7829	15.8722	15.7854	16.0769	16.0351	15.9764	30	73	47.156	419	0	78.351	15.4111	15.4613	15.5308	15.6121	15.3935	15.647	15.7277
O03042;P93292;F4INE2	O03042	Ribulose bisphosphate carboxylase large chain	rbcL	sp|O03042|RBL_ARATH Ribulose bisphosphate carboxylase large chain OS=Arabidopsis thaliana GN=rbcL PE=1 SV=1	3	24.1718	23.9332	23.9642	24.1989	24.1007	24.3965	24.3222	24.201	24.0319	23.6702	23.921	23.7392	24.2592	24.2166	23.9077	24.1893	24.4268	24.3914	24.305	24.3027	24.4381	24.3455	24.4864	24.2738	24.2317	24.2853	24.5621	24.819	24.9954	24.6369	24.763	50	72.9	52.954	479	0	323.31	24.1771	23.9314	23.944	24.1715	24.0638	24.3943	24.3239
Q8W4H7;Q8GTY0;Q0WL56;P0DH99;Q6NLF6	Q8W4H7;Q8GTY0;Q0WL56;P0DH99	Elongation factor 1-alpha 2;Elongation factor 1-alpha 4;Elongation factor 1-alpha 3;Elongation factor 1-alpha 1	A2;A4;A3;A1	sp|Q8W4H7|EF1A2_ARATH Elongation factor 1-alpha 2 OS=Arabidopsis thaliana GN=A2 PE=1 SV=2;sp|Q8GTY0|EF1A4_ARATH Elongation factor 1-alpha 4 OS=Arabidopsis thaliana GN=A4 PE=1 SV=2;sp|Q0WL56|EF1A3_ARATH Elongation factor 1-alpha 3 OS=Arabidopsis thaliana GN	5	22.4973	22.4586	22.491	22.6458	22.5399	22.4936	22.4631	22.5264	22.7715	22.7834	22.6893	22.7113	22.5455	22.5347	22.486	22.5386	22.5892	22.6455	22.7922	22.5802	22.5809	22.6424	22.651	22.4964	22.5377	22.5254	22.603	22.3174	22.5349	22.6045	22.4558	35	72.8	49.502	449	0	323.31	22.6988	22.653	22.6671	22.8146	22.6992	22.6877	22.661
O24456	O24456	Receptor for activated C kinase 1A	RACK1A	sp|O24456|GBLPA_ARATH Receptor for activated C kinase 1A OS=Arabidopsis thaliana GN=RACK1A PE=1 SV=2	1	21.6959	21.6957	21.7187	21.6439	21.5743	21.5198	21.6279	21.6679	21.5621	21.5812	21.6993	21.6083	21.5055	21.6399	21.6132	21.5581	21.3567	21.4105	21.4772	21.5585	21.4478	21.4138	21.3977	21.5017	21.4917	21.4553	21.4547	21.3635	21.1231	21.3278	21.2194	27	72.8	35.747	327	0	323.31	21.5722	21.565	21.5696	21.4876	21.4085	21.3887	21.5006
P21218	P21218	Protochlorophyllide reductase B, chloroplastic	PORB	sp|P21218|PORB_ARATH Protochlorophyllide reductase B, chloroplastic OS=Arabidopsis thaliana GN=PORB PE=1 SV=3	1	19.6733	19.6774	19.8081	19.945	19.5647	19.3885	19.1618	19.6085	19.8467	19.9533	19.9562	19.9879	19.8615	20.0714	19.9661	19.7489	20.0072	19.8743	19.9652	19.9057	20.1558	19.8542	19.6682	20.1421	19.9517	19.8371	20.0749	20.134	20.2258	20.0627	20.1934	27	72.8	43.359	401	0	323.31	19.644	19.6411	19.7534	19.8831	19.4932	19.3518	19.1289
Q9FIE8	Q9FIE8	UDP-glucuronic acid decarboxylase 3	UXS3	sp|Q9FIE8|UXS3_ARATH UDP-glucuronic acid decarboxylase 3 OS=Arabidopsis thaliana GN=UXS3 PE=1 SV=1	1	19.3896	19.4363	19.4803	19.5617	19.4013	19.3364	19.4476	19.4143	19.2705	19.2919	19.4011	19.4433	19.375	19.5243	19.489	19.5789	19.451	19.4322	19.3809	19.4347	19.5507	19.4859	19.512	19.3167	19.2652	19.2655	19.3448	19.9127	19.9178	20.0101	19.9907	24	72.8	38.569	342	0	264.34	19.9505	19.9902	20.0158	20.09	19.92	19.8899	20.005
Q9SRH5	Q9SRH5	Mitochondrial outer membrane protein porin 1	VDAC1	sp|Q9SRH5|VDAC1_ARATH Mitochondrial outer membrane protein porin 1 OS=Arabidopsis thaliana GN=VDAC1 PE=1 SV=3	1	18.6951	18.8323	18.7154	18.7471	18.8754	18.7696	18.7627	18.7018	19.4095	19.6307	19.3803	19.6017	18.9299	18.9002	18.898	18.8203	19.0101	18.9447	18.9968	18.6458	18.8371	18.8956	18.7545	19.8151	19.8622	19.5455	19.5684	18.9788	18.8376	18.8946	18.9259	18	72.8	29.425	276	0	323.31	18.7003	18.8305	18.6952	18.7196	18.8384	18.7674	18.7644
Q9C4Z6	Q9C4Z6	Receptor for activated C kinase 1B	RACK1B	sp|Q9C4Z6|GPLPB_ARATH Receptor for activated C kinase 1B OS=Arabidopsis thaliana GN=RACK1B PE=1 SV=1	1	19.0081	18.9757	19.004	18.9957	18.9464	18.8957	19.0509	18.9694	19.2736	19.2669	19.3386	19.3653	18.9278	18.9418	19.072	18.9949	19.0717	19.0359	19.1626	18.9611	18.9472	18.9729	18.9221	19.0665	19.1353	19.0675	18.95	18.7831	18.7272	18.9502	18.7926	24	72.7	35.8	326	0	323.31	18.8427	18.8032	18.8131	18.7976	18.7388	18.7228	18.8819
Q56ZI2	Q56ZI2	Patellin-2	PATL2	sp|Q56ZI2|PATL2_ARATH Patellin-2 OS=Arabidopsis thaliana GN=PATL2 PE=1 SV=2	1	21.2009	21.3547	21.1854	21.1288	20.9729	20.801	20.8475	21.0352	20.3668	20.3268	20.2928	20.2786	21.6311	21.4189	21.2522	21.3197	20.9916	20.9617	20.9896	21.1669	21.3371	20.9983	21.0527	21.5189	21.3647	21.1034	21.4928	21.3526	21.291	21.2198	21.2693	48	72.6	76.007	683	0	323.31	21.3141	21.461	21.2733	21.2094	21.044	20.9068	20.9572
Q84WV1	Q84WV1	T-complex protein 1 subunit gamma	CCT3	sp|Q84WV1|TCPG_ARATH T-complex protein 1 subunit gamma OS=Arabidopsis thaliana GN=CCT3 PE=1 SV=1	1	20.7149	20.6776	20.6242	20.7159	20.8692	20.9185	20.9236	20.8691	20.9352	20.9587	20.9412	20.8247	20.7579	20.6929	20.6697	20.7094	20.691	20.7945	20.9613	21.0079	20.8561	21.065	21.1531	20.6242	20.671	20.6443	20.638	20.6976	20.9451	20.9454	20.8536	41	72.6	60.339	555	0	323.31	20.6223	20.5779	20.5061	20.5907	20.7344	20.8185	20.8274
Q96522	Q96522	Peroxidase 45	PER45	sp|Q96522|PER45_ARATH Peroxidase 45 OS=Arabidopsis thaliana GN=PER45 PE=1 SV=1	1	19.6344	19.6002	19.6282	19.4889	19.3703	19.0321	19.0736	19.4774	19.5277	19.4394	19.453	19.5196	19.4296	19.4375	19.7151	19.4701	19.468	19.7675	19.9257	19.8816	19.7766	19.5473	19.5996	19.4754	19.4457	19.2509	19.2579	19.7342	19.7363	20.2713	19.9763	22	72.6	35.828	325	0	323.31	19.6891	19.6479	19.6575	19.5111	19.3829	19.0795	19.1247
Q8RUH0	Q8RUH0			tr|Q8RUH0|Q8RUH0_ARATH Putative small nuclear ribonucleoprotein D2 OS=Arabidopsis thaliana GN=At2g47640 PE=4 SV=1	1	17.9709	17.9149	17.9526	17.8674	18.0292	18.0173	18.0771	18.0593	17.6487	17.6187	17.6763	17.6604	17.8297	17.8327	17.976	17.9465	17.8125	17.9584	17.9027	17.9497	17.9789	17.8826	17.9063	17.7858	17.7719	17.7769	17.8164	17.9229	17.947	17.95	17.9231	10	72.5	12.635	109	0	98.679	18.0657	18.0026	18.0219	17.9295	18.0817	18.1046	18.1683
F4J9K9	F4J9K9		At3g05900	tr|F4J9K9|F4J9K9_ARATH Neurofilament protein-related protein OS=Arabidopsis thaliana GN=At3g05900 PE=1 SV=1	1	19.6026	19.6842	19.5948	19.6692	19.6109	19.5907	19.595	19.568	19.4607	19.4012	19.5761	19.4818	19.8828	19.7885	19.6612	19.7699	19.6316	19.6095	19.58	19.7015	19.6791	19.7249	19.651	20.0743	19.9587	19.9421	20.1606	19.7528	19.78	19.7218	19.7101	42	72.4	73.453	673	0	323.31	19.695	19.7695	19.6617	19.7289	19.661	19.6756	19.6837
Q0WV25;B9DGT7	Q0WV25;B9DGT7	Tubulin alpha-4 chain;Tubulin alpha-2 chain	TUBA4;TUBA2	sp|Q0WV25|TBA4_ARATH Tubulin alpha-4 chain OS=Arabidopsis thaliana GN=TUBA4 PE=2 SV=2;sp|B9DGT7|TBA2_ARATH Tubulin alpha-2 chain OS=Arabidopsis thaliana GN=TUBA2 PE=2 SV=2	2	13.8781	14.0736	14.0297	14.0261	13.845	13.9256	13.9759	14.0764	13.6323	13.3085	13.2476	13.2804	14.0357	14.1509	13.993	13.9887	13.8324	14.0122	13.862	14.2592	14.078	14.2029	14.4297	13.7123	13.649	13.5775	13.7613	14.0505	13.9644	14.246	14.3366	27	72.4	49.54	450	0	41.115	13.3794	13.5678	13.5056	13.4947	13.3041	13.4194	13.4736
P29511	P29511	Tubulin alpha-6 chain	TUBA6	sp|P29511|TBA6_ARATH Tubulin alpha-6 chain OS=Arabidopsis thaliana GN=TUBA6 PE=1 SV=1	1	21.2397	21.2969	21.2755	21.4179	21.1202	21.1641	21.1073	21.2788	20.9014	20.5237	20.7413	20.6561	21.4267	21.4068	21.1843	21.2686	21.2724	21.3473	21.2985	21.5048	21.5239	21.5487	21.6434	21.1221	21.0449	21.0678	21.2447	21.4207	21.6394	21.5837	21.6225	27	72.4	49.537	450	0	323.31	21.2665	21.3168	21.2769	21.4121	21.1049	21.1836	21.1306
P34893	P34893	10 kDa chaperonin	CPN10	sp|P34893|CH10_ARATH 10 kDa chaperonin OS=Arabidopsis thaliana GN=CPN10 PE=3 SV=1	1	17.4635	17.1526	17.0755	17.0266	17.5407	17.3962	17.6664	17.3714	17.1751	17.1971	17.2539	17.4607	16.9936	16.9256	17.05	17.1357	17.0202	17.0478	16.9213	17.2709	17.1772	17.2314	17.2255	17.0843	17.3366	17.4858	17.1224	17.0755	17.0986	16.8514	17.1028	8	72.4	10.812	98	0	108.9	17.632	17.3141	17.2185	17.1625	17.667	17.5573	17.8313
Q9FK25;Q9LQ17;Q9FHZ5;Q9CAQ3;Q9CAM9	Q9FK25	Flavone 3-O-methyltransferase 1	OMT1	sp|Q9FK25|OMT1_ARATH Flavone 3-O-methyltransferase 1 OS=Arabidopsis thaliana GN=OMT1 PE=1 SV=1	5	19.4603	19.5104	19.4449	19.4009	19.4819	19.5531	19.4242	19.5361	19.0329	18.8282	18.8247	18.8007	19.3808	19.3454	19.3834	19.3681	19.4328	19.3197	19.1811	19.5118	19.6243	19.464	19.5077	19.3322	19.3087	19.4671	19.3608	19.5691	19.5537	19.4658	19.5623	20	72.2	39.618	363	0	323.31	19.5236	19.5667	19.4827	19.4316	19.503	19.609	19.4839
Q9CAV0	Q9CAV0	40S ribosomal protein S3a-1	RPS3AA	sp|Q9CAV0|RS3A1_ARATH 40S ribosomal protein S3a-1 OS=Arabidopsis thaliana GN=RPS3AA PE=1 SV=3	1	21.3467	21.3303	21.3174	21.3149	21.1786	21.1603	21.2307	21.2655	21.2046	21.2156	21.3091	21.2481	21.1631	21.241	21.2787	21.2457	21.1095	21.1115	21.1816	21.1694	21.0656	21.0579	21.0387	21.112	21.1141	21.1373	21.1824	20.9538	20.9051	20.926	20.7903	26	72.1	29.85	262	0	323.31	21.6296	21.6061	21.5748	21.5651	21.4193	21.4357	21.51
P49227	P49227	60S ribosomal protein L5-2	RPL5B	sp|P49227|RL52_ARATH 60S ribosomal protein L5-2 OS=Arabidopsis thaliana GN=RPL5B PE=2 SV=3	1	19.4014	19.2849	19.3031	19.2415	19.2434	19.1905	19.2312	19.2799	19.1074	18.9622	19.1491	19.0706	19.1596	19.2035	19.2452	19.1454	19.0043	19.0265	19.0223	19.0388	19.0232	18.9096	18.9463	18.9212	18.9128	18.9228	18.9182	18.8049	18.814	18.9035	18.7316	21	72.1	34.437	301	0	35.852	19.1412	19.0177	19.0175	18.9488	18.941	18.9229	18.9674
P42760	P42760	Glutathione S-transferase F6	GSTF6	sp|P42760|GSTF6_ARATH Glutathione S-transferase F6 OS=Arabidopsis thaliana GN=GSTF6 PE=2 SV=2	1	18.5883	18.6143	18.5359	18.2559	19.4726	19.4464	19.5117	19.145	17.7759	17.6547	17.5737	17.5422	18.2424	18.1353	18.3641	18.3376	18.041	18.0305	17.8852	18.8279	18.8505	18.569	18.8111	17.9219	17.9596	17.9533	17.8447	18.7981	18.6154	18.2001	18.7285	15	72.1	23.486	208	0	100.04	17.8565	17.8756	17.7787	17.4915	18.6987	18.7072	18.7764
P56792	P56792	50S ribosomal protein L14, chloroplastic	rpl14	sp|P56792|RK14_ARATH 50S ribosomal protein L14, chloroplastic OS=Arabidopsis thaliana GN=rpl14 PE=3 SV=1	1	18.6058	18.5494	18.6579	18.7768	18.5801	18.5946	18.5075	18.6461	18.7793	18.673	18.7365	18.637	18.5675	18.6567	18.6795	18.5981	18.7178	18.7575	18.848	18.7786	18.6731	18.7384	18.6038	18.551	18.5435	18.5379	18.5853	18.4628	18.5944	18.7658	18.6312	12	72.1	13.582	122	0	323.31	18.6176	18.5542	18.6443	18.756	18.5498	18.599	18.5158
Q94II5	Q94II5		RD2	tr|Q94II5|Q94II5_ARATH Dessication responsive protein OS=Arabidopsis thaliana GN=RD2 PE=1 SV=1	1	17.2839	17.4706	17.3281	17.2236	17.5293	17.3653	17.4086	17.3226	17.4304	17.5392	17.4232	17.4689	17.4917	17.3412	17.4947	17.4197	17.2726	17.2471	17.1658	17.3515	17.3971	17.3172	17.2609	17.6548	17.7347	17.6361	17.5256	17.1223	17.1335	17.1239	17.1138	11	72	21.253	193	0	135.97	17.2332	17.4129	17.252	17.1403	17.4365	17.3072	17.3543
P60040	P60040	60S ribosomal protein L7-2	RPL7B	sp|P60040|RL72_ARATH 60S ribosomal protein L7-2 OS=Arabidopsis thaliana GN=RPL7B PE=2 SV=1	1	21.5216	21.4587	21.4833	21.4581	21.4006	21.3491	21.4252	21.4537	21.3857	21.3374	21.3964	21.3679	21.3608	21.3973	21.435	21.3567	21.1985	21.2832	21.3364	21.343	21.2519	21.2094	21.243	21.201	21.2485	21.2167	21.2798	21.1083	21.1243	21.198	21.0353	31	71.9	28.171	242	0	323.31	20.9733	20.9034	20.9096	20.8773	20.8101	20.7934	20.8734
P46643	P46643	Aspartate aminotransferase, mitochondrial	ASP1	sp|P46643|AAT1_ARATH Aspartate aminotransferase, mitochondrial OS=Arabidopsis thaliana GN=ASP1 PE=1 SV=1	1	20.492	20.4966	20.3928	19.9708	20.6643	20.5482	20.7761	20.6015	20.0938	20.216	20.063	20.1868	20.1512	19.9923	20.2986	20.2505	19.9632	19.9239	19.8488	20.2952	20.0726	20.1384	20.2235	19.3981	19.418	19.5982	19.3112	20.0848	19.9569	19.9231	20.2513	29	71.9	47.757	430	0	323.31	20.4371	20.4347	20.3125	19.8833	20.5673	20.4859	20.7177
Q56WD9	Q56WD9	3-ketoacyl-CoA thiolase 2, peroxisomal	PED1	sp|Q56WD9|THIK2_ARATH 3-ketoacyl-CoA thiolase 2, peroxisomal OS=Arabidopsis thaliana GN=PED1 PE=1 SV=2	1	20.0772	20.1449	20.1264	20.1034	20.1453	20.1298	20.1392	20.1506	20.3429	20.7989	20.5504	20.7346	20.0758	20.1642	20.2189	20.1968	20.0855	20.0496	20.0902	20.1334	20.121	20.2639	20.2363	20.0989	20.0765	19.9877	19.9619	20.0435	20.1511	20.2237	20.154	26	71.9	48.578	462	0	323.31	20.3498	20.4105	20.3736	20.3433	20.3757	20.395	20.4082
P48006	P48006	Elongation factor 1-delta 1		sp|P48006|EF1D1_ARATH Elongation factor 1-delta 1 OS=Arabidopsis thaliana GN=At1g30230 PE=1 SV=2	1	19.5683	19.5498	19.4162	19.2881	19.5355	19.627	19.6553	19.5076	18.9877	18.9128	18.8337	18.882	19.2857	19.3444	19.3929	19.4174	19.402	19.2053	19.068	19.6352	19.6298	19.4204	19.6182	19.0094	19.0465	19.0209	18.9466	19.7802	19.7215	19.5049	19.7036	16	71.9	25.132	231	0	269.12	19.7404	19.7148	19.5628	19.4276	19.6654	19.7917	19.8238
Q42262;REV__Q6DR69	Q42262	40S ribosomal protein S3a-2	RPS3AB	sp|Q42262|RS3A2_ARATH 40S ribosomal protein S3a-2 OS=Arabidopsis thaliana GN=RPS3AB PE=2 SV=3	2	20.4871	20.4434	20.4851	20.4441	20.4045	20.3589	20.4339	20.4121	20.3211	20.2875	20.3873	20.3009	20.3605	20.4023	20.456	20.3812	20.2661	20.2753	20.3282	20.3365	20.2571	20.239	20.2296	20.2658	20.2953	20.2826	20.3237	20.0938	20.0238	20.1189	20.0214	25	71.8	29.803	262	0	323.31	20.3133	20.2626	20.2859	20.2377	20.1886	20.1777	20.2566
Q9LV28	Q9LV28	Receptor for activated C kinase 1C	RACK1C	sp|Q9LV28|GPLPC_ARATH Receptor for activated C kinase 1C OS=Arabidopsis thaliana GN=RACK1C PE=1 SV=1	1	16.5063	16.4821	16.5327	16.4962	16.5279	16.4998	16.57	16.5087	16.8703	16.8671	16.9134	16.8615	16.5388	16.4228	16.5436	16.5099	16.7095	16.6863	16.814	16.5226	16.505	16.4919	16.4942	16.4747	16.5549	16.5968	16.458	16.4202	16.4395	16.6451	16.5148	24	71.8	35.827	326	0	160.49	16.4855	16.4542	16.4864	16.4427	16.4649	16.4715	16.5456
Q9SD78	Q9SD78		F13G24.260	tr|Q9SD78|Q9SD78_ARATH Putative uncharacterized protein At5g08060 OS=Arabidopsis thaliana GN=F13G24.260 PE=2 SV=1	1	17.3062	17.4389	17.4712	17.5259	17.4601	17.4022	17.2737	17.4329	18.0061	18.258	18.21	18.4599	17.476	17.6025	17.558	17.5439	17.659	17.5358	17.5307	17.589	17.7118	17.7128	17.6025	17.9083	17.9805	17.8149	17.9091	17.8719	17.908	17.8568	17.8288	6	71.8	15.038	131	0	104.61	17.0106	17.1363	17.1503	17.1978	17.1224	17.0993	16.9745
O80576	O80576		At2g44060	tr|O80576|O80576_ARATH At2g44060 OS=Arabidopsis thaliana GN=At2g44060 PE=2 SV=1	1	19.5052	19.5609	19.4538	19.4401	19.5394	19.5265	19.5926	19.5074	19.4291	19.4359	19.3174	19.4351	19.6489	19.5963	19.5468	19.4932	19.5913	19.3556	19.2925	19.2392	19.4301	19.3379	19.2582	19.5699	19.542	19.4294	19.4593	19.709	19.5345	19.3538	19.5146	23	71.7	36.036	325	0	267.01	19.5341	19.5828	19.4572	19.4364	19.5261	19.5479	19.6179
Q9LK25	Q9LK25	Prohibitin-4, mitochondrial	PHB4	sp|Q9LK25|PHB4_ARATH Prohibitin-4, mitochondrial OS=Arabidopsis thaliana GN=PHB4 PE=1 SV=1	1	17.0444	17.1966	17.241	17.2554	17.1161	17.1045	17.1057	17.1478	17.5788	17.771	17.6409	17.8152	17.1669	17.2263	17.3237	17.2333	17.2578	17.3565	17.3592	17.403	17.4951	17.4744	17.4154	17.7397	17.8428	17.6681	17.6497	17.5688	17.3252	17.4861	17.5523	14	71.7	30.638	279	0	260.26	16.7947	16.94	16.9659	16.9731	16.8243	16.8474	16.8525
Q8VY57	Q8VY57		ARLA1C	tr|Q8VY57|Q8VY57_ARATH ADP-RIBOSYLATION FACTOR-like protein OS=Arabidopsis thaliana GN=ARLA1C PE=2 SV=1	1	14.7085	14.8075	14.7787	14.6001	14.7423	14.6729	14.7897	14.7042	14.6474	14.6161	14.6848	14.6644	14.7451	14.7108	14.7945	14.7948	14.615	14.956	14.9996	14.9815	14.9589	14.7856	14.9292	14.8373	14.9113	14.8962	14.9969	14.527	14.7417	14.8506	14.7904	9	71.7	20.403	184	0	31.664	14.5682	14.6602	14.613	14.4272	14.5599	14.5252	14.6459
Q8RWT5	Q8RWT5		At2g35040	tr|Q8RWT5|Q8RWT5_ARATH AICARFT/IMPCHase bienzyme family protein OS=Arabidopsis thaliana GN=At2g35040 PE=1 SV=1	1	18.6997	18.8368	18.8794	19.0978	18.763	18.6986	18.6706	18.8293	18.9255	18.9137	18.8834	18.8988	19.0695	19.0131	18.9295	19.0586	18.8999	18.7762	18.8395	19.1115	19.0173	18.9321	19.0464	18.7145	18.625	18.7276	18.6679	18.703	18.9107	18.6789	18.9619	31	71.6	64.906	596	0	323.31	18.7738	18.9038	18.928	19.1392	18.7949	18.7653	18.7411
Q9C5U3	Q9C5U3	26S protease regulatory subunit 8 homolog A	RPT6A	sp|Q9C5U3|PRS8A_ARATH 26S protease regulatory subunit 8 homolog A OS=Arabidopsis thaliana GN=RPT6A PE=1 SV=1	1	19.9523	19.9864	19.9502	19.9417	19.9459	19.9326	20.039	19.9426	19.7384	19.6445	19.7062	19.692	19.8447	19.9051	19.8769	19.9527	19.8354	19.9316	19.8816	20.0107	19.9022	19.9538	20.0087	19.8521	19.8993	19.9048	19.8612	19.8136	19.9081	19.943	19.891	30	71.6	47.247	419	0	323.31	19.9977	20.0247	19.9701	19.9545	19.9491	19.9706	20.0808
P56801	P56801	30S ribosomal protein S8, chloroplastic	rps8	sp|P56801|RR8_ARATH 30S ribosomal protein S8, chloroplastic OS=Arabidopsis thaliana GN=rps8 PE=3 SV=1	1	18.6606	18.5317	18.6952	18.6956	18.5384	18.4456	18.4256	18.5808	18.5711	18.345	18.5413	18.4092	18.5594	18.6315	18.5671	18.5281	18.5471	18.5192	18.5775	18.6592	18.6099	18.6037	18.4863	18.3477	18.3816	18.4172	18.342	18.5019	18.4322	18.5831	18.5026	12	71.6	15.479	134	0	62.337	18.6619	18.5259	18.671	18.6642	18.4975	18.4394	18.4233
O04983	O04983	Biotin carboxylase, chloroplastic	CAC2	sp|O04983|ACCC_ARATH Biotin carboxylase, chloroplastic OS=Arabidopsis thaliana GN=CAC2 PE=1 SV=1	1	19.8938	19.9111	19.9482	19.9687	19.8004	19.7845	19.8322	19.904	19.6849	19.459	19.5926	19.5471	19.9913	19.9769	19.8767	20.0014	19.7947	19.7916	19.7686	19.9534	19.9213	19.9389	19.9606	19.9154	19.8091	19.8069	19.8903	20.0983	20.1269	19.9783	20.1014	31	71.5	58.386	537	0	323.31	19.8968	19.907	19.9257	19.9391	19.7612	19.7801	19.8316
Q9LF98;F4KGQ0;P22197	Q9LF98	Fructose-bisphosphate aldolase	F8J2_100	tr|Q9LF98|Q9LF98_ARATH Fructose-bisphosphate aldolase OS=Arabidopsis thaliana GN=F8J2_100 PE=1 SV=1	3	20.1452	19.9979	19.9342	19.8391	19.8317	19.964	19.9913	19.8619	20.2016	20.3001	20.2986	20.3158	20.0291	20.0247	20.0062	20.0462	20.0393	19.9109	19.8094	19.7412	19.757	19.6782	19.728	19.8015	19.7584	19.8272	19.7112	20.0111	19.8852	19.7915	19.8608	25	71.5	38.539	358	0	323.31	20.2844	20.1302	20.0481	19.9458	19.9288	20.0958	20.127
Q9FYF8	Q9FYF8		At1g67350	tr|Q9FYF8|Q9FYF8_ARATH At1g67350 OS=Arabidopsis thaliana GN=At1g67350 PE=2 SV=1	1	16.1057	16.0662	16.2794	16.4129	16.3164	16.1227	16.1239	16.2094	17.0756	17.1631	17.0605	17.1605	16.5323	16.6309	16.6423	16.4551	16.4252	16.2827	16.3454	16.3506	16.6072	16.4712	16.298	16.9316	16.8741	16.6035	16.7518	16.6039	16.5099	16.4093	16.5816	7	71.4	11.791	98	0	86.855	15.2359	15.1893	15.3841	15.5105	15.4044	15.2455	15.2506
O80858	O80858			tr|O80858|O80858_ARATH Expressed protein OS=Arabidopsis thaliana GN=At2g30930 PE=1 SV=1	1	17.2562	17.3226	17.2215	17.1351	17.1545	16.9847	17.0232	17.0263	16.9298	17.0148	17.0586	17.067	17.4777	17.421	17.2989	17.2979	17.2368	17.3123	17.2773	17.1381	17.1673	17.1309	17.0459	18.45	18.4281	18.4045	18.4574	17.2166	17.0128	16.9628	17.0589	9	71.3	16.936	164	0	204.21	17.614	17.6734	17.554	17.4604	17.4702	17.3352	17.3775
Q42403	Q42403	Thioredoxin H3	TRX3	sp|Q42403|TRXH3_ARATH Thioredoxin H3 OS=Arabidopsis thaliana GN=TRX3 PE=1 SV=1	1	18.4952	18.5046	18.3839	18.3546	18.2463	18.2573	18.5526	18.2919	18.2324	18.0872	18.1237	18.2087	18.3942	18.3754	18.2974	18.4359	18.3529	18.1416	17.9158	18.1713	18.1454	18.2019	18.2142	18.4315	18.3059	18.2999	18.2767	18.5144	18.4635	18.146	18.2721	7	71.2	13.109	118	0	131.4	18.2416	18.244	18.1048	18.0683	17.9505	17.9962	18.2954
Q96292;Q96293	Q96292;Q96293	Actin-2;Actin-8	ACT2;ACT8	sp|Q96292|ACT2_ARATH Actin-2 OS=Arabidopsis thaliana GN=ACT2 PE=1 SV=1;sp|Q96293|ACT8_ARATH Actin-8 OS=Arabidopsis thaliana GN=ACT8 PE=1 SV=2	2	21.0527	21.1508	21.1729	21.2475	21.1209	21.0914	20.9896	21.1226	20.9745	20.7469	20.7832	20.6842	21.399	21.3094	21.1807	21.2286	21.1317	21.095	21.1624	21.4208	21.4125	21.4482	21.5076	21.0413	20.9433	20.9812	21.0355	21.26	21.4686	21.4056	21.4413	25	71.1	41.876	377	0	323.31	20.8321	20.9231	20.9268	20.9942	20.8581	20.8633	20.7654
Q96262	Q96262	Plasma membrane-associated cation-binding protein 1	PCAP1	sp|Q96262|PCAP1_ARATH Plasma membrane-associated cation-binding protein 1 OS=Arabidopsis thaliana GN=PCAP1 PE=1 SV=1	1	19.4148	19.5528	19.3539	19.2657	19.3746	19.2529	19.2816	19.2673	18.9061	18.9272	19.0608	18.8907	19.6959	19.5625	19.3755	19.4781	19.1304	19.0375	18.9631	19.2093	19.2565	19.1875	19.1518	19.8732	19.7453	19.642	19.7644	19.4392	19.3462	19.1664	19.4403	19	71.1	24.584	225	0	323.31	19.5962	19.7272	19.5099	19.4145	19.5139	19.4269	19.4594
Q9SZX9	Q9SZX9	60S ribosomal protein L9-2	RPL9D	sp|Q9SZX9|RL92_ARATH 60S ribosomal protein L9-2 OS=Arabidopsis thaliana GN=RPL9D PE=2 SV=1	1	18.7587	18.7221	18.7461	18.6963	18.8293	18.7923	18.8305	18.7366	18.6335	18.6355	18.6996	18.5885	18.6655	18.7159	18.8419	18.7514	18.5749	18.625	18.6479	18.3732	18.3008	18.3462	18.348	18.5186	18.5493	18.5489	18.5795	18.3249	18.3111	18.4705	18.3143	15	71.1	21.973	194	0	269.59	18.6186	18.575	18.5805	18.5236	18.647	18.6448	18.6868
Q9C5Z3	Q9C5Z3	Eukaryotic translation initiation factor 3 subunit E	TIF3E1	sp|Q9C5Z3|EIF3E_ARATH Eukaryotic translation initiation factor 3 subunit E OS=Arabidopsis thaliana GN=TIF3E1 PE=1 SV=1	1	19.8214	19.7949	19.8238	19.724	19.8874	19.897	19.9136	19.9155	19.866	19.8864	19.9756	19.8328	19.6777	19.6844	19.7531	19.7589	19.7373	19.8252	19.8593	19.9135	19.7973	19.8613	19.8449	19.8624	19.9766	20.0458	19.8911	19.5041	19.5351	19.6703	19.6019	27	71	51.749	441	0	323.31	19.7857	19.7522	19.7627	19.6557	19.8095	19.8539	19.8743
Q9T091	Q9T091	Vacuolar protein sorting-associated protein 26B	VPS26B	sp|Q9T091|VP26B_ARATH Vacuolar protein sorting-associated protein 26B OS=Arabidopsis thaliana GN=VPS26B PE=2 SV=2	1	16.4295	16.4064	16.4513	16.3178	16.3928	16.3036	16.2962	16.2732	16.5263	16.5769	16.6255	16.5504	16.3146	16.3589	16.3944	16.414	16.316	16.3362	16.3389	16.2474	16.2164	16.2985	16.2978	16.3709	16.3245	16.4269	16.4177	16.1778	16.2728	16.3714	16.3472	19	71	35.204	303	0	100.16	16.3754	16.3452	16.3718	16.231	16.2965	16.2421	16.2385
Q9FE58	Q9FE58	60S ribosomal protein L22-3	RPL22C	sp|Q9FE58|RL223_ARATH 60S ribosomal protein L22-3 OS=Arabidopsis thaliana GN=RPL22C PE=2 SV=1	1	16.879	16.7911	16.83	16.6579	16.7747	16.726	16.7834	16.7443	16.523	16.5713	16.7048	16.6706	16.6095	16.6762	16.843	16.7443	16.3633	16.4503	16.5241	16.5492	16.4228	16.3579	16.3294	16.6069	16.6286	16.605	16.6378	16.2823	16.229	16.2032	16.0621	13	71	14.047	124	0	47.648	16.3399	16.245	16.2655	16.0862	16.1935	16.1795	16.2407
Q9M9W1	Q9M9W1	60S ribosomal protein L22-2	RPL22B	sp|Q9M9W1|RL222_ARATH 60S ribosomal protein L22-2 OS=Arabidopsis thaliana GN=RPL22B PE=2 SV=1	1	20.4321	20.4472	20.4596	20.447	20.3358	20.3645	20.4122	20.4325	20.2494	20.3761	20.4365	20.4931	20.3143	20.421	20.5344	20.4421	20.0418	20.1285	20.2516	20.2381	20.1585	20.0644	20.1286	20.3713	20.2553	20.2205	20.2781	19.7766	19.8166	19.8775	19.6753	13	71	14.018	124	0	117.57	20.616	20.6241	20.6181	20.5982	20.4775	20.5409	20.5925
Q9XI91	Q9XI91	Eukaryotic translation initiation factor 5A-1	ELF5A-1	sp|Q9XI91|IF5A1_ARATH Eukaryotic translation initiation factor 5A-1 OS=Arabidopsis thaliana GN=ELF5A-1 PE=1 SV=1	1	16.8146	16.8885	16.8164	16.6989	16.697	16.4726	16.593	16.6835	16.5681	16.6155	16.7205	16.6796	16.6976	16.6156	16.7554	16.7265	16.5671	16.5629	16.4096	16.6442	16.5165	16.5264	16.5012	16.3871	16.398	16.4546	16.353	16.3966	16.3363	16.5018	16.3846	10	70.9	17.36	158	0	51.272	16.4624	16.5293	16.4388	16.3141	16.3026	16.113	16.2372
O49299	O49299	Probable phosphoglucomutase, cytoplasmic 1		sp|O49299|PGMC1_ARATH Probable phosphoglucomutase, cytoplasmic 1 OS=Arabidopsis thaliana GN=At1g23190 PE=2 SV=2	1	20.5911	20.6381	20.5802	20.4874	20.623	20.6424	20.4767	20.6517	20.2517	20.0565	20.0086	20.094	20.538	20.4631	20.4685	20.4554	20.5908	20.4408	20.2859	20.7109	20.723	20.5263	20.6396	20.0168	19.9692	20.0405	20.0726	20.6296	20.6219	20.6699	20.6132	35	70.8	63.17	583	0	323.31	20.7364	20.7763	20.7	20.6001	20.7261	20.7802	20.6184
P29516	P29516	Tubulin beta-8 chain	TUBB8	sp|P29516|TBB8_ARATH Tubulin beta-8 chain OS=Arabidopsis thaliana GN=TUBB8 PE=2 SV=2	1	16.2919	16.536	16.3495	16.4454	16.167	16.1248	16.0625	16.2419	15.9751	15.7408	15.8994	15.6451	16.4841	16.4999	16.2783	16.3893	16.3554	16.3958	16.3726	16.3363	16.3479	16.5106	16.5257	16.2553	16.1103	16.1331	16.3192	16.4122	16.5115	16.4467	16.4504	28	70.8	50.606	449	0	86.879	16.3751	16.6121	16.4073	16.4959	16.2079	16.2005	16.1421
Q9LIA8	Q9LIA8	UDP-glucose 6-dehydrogenase 2	UGD2	sp|Q9LIA8|UGDH2_ARATH UDP-glucose 6-dehydrogenase 2 OS=Arabidopsis thaliana GN=UGD2 PE=1 SV=1	1	19.249	19.2293	19.1689	19.0784	19.368	19.3758	19.4501	19.3244	19.0207	18.9545	18.9971	18.9786	19.1557	19.1282	19.1849	19.1964	19.3621	19.265	19.0425	19.334	19.344	19.2802	19.3525	19.2488	19.1832	19.1826	19.1891	19.4583	19.3694	19.4278	19.4405	27	70.8	53.172	480	0	323.31	19.5837	19.557	19.4781	19.3804	19.6605	19.7031	19.7812
Q0WW26;F4IKA7	Q0WW26	Coatomer subunit gamma		sp|Q0WW26|COPG_ARATH Coatomer subunit gamma OS=Arabidopsis thaliana GN=At4g34450 PE=1 SV=2	2	20.4999	20.545	20.5646	20.5971	20.4459	20.3908	20.3929	20.4263	20.4774	20.4817	20.4611	20.4237	20.4948	20.5282	20.5158	20.5362	20.523	20.5777	20.5381	20.6421	20.6095	20.596	20.6171	20.4517	20.4643	20.5546	20.469	20.4587	20.4327	20.6535	20.5681	55	70.7	98.49	886	0	323.31	20.5798	20.6178	20.6191	20.6443	20.4836	20.4632	20.4692
P21240	P21240	Chaperonin 60 subunit beta 1, chloroplastic	CPN60B1	sp|P21240|CPNB1_ARATH Chaperonin 60 subunit beta 1, chloroplastic OS=Arabidopsis thaliana GN=CPN60B1 PE=1 SV=3	1	21.3429	21.2514	21.2659	21.2995	21.4231	21.3881	21.4713	21.393	21.048	20.8899	21.0047	21.0488	21.3124	21.3602	21.2684	21.3546	21.255	21.2417	21.1246	21.3842	21.4429	21.4038	21.3808	21.3185	21.3335	21.3202	21.3072	21.3813	21.5021	21.4208	21.3983	40	70.7	63.808	600	0	323.31	21.446	21.3474	21.3435	21.37	21.4839	21.4837	21.5708
P29197	P29197	Chaperonin CPN60, mitochondrial	CPN60	sp|P29197|CH60A_ARATH Chaperonin CPN60, mitochondrial OS=Arabidopsis thaliana GN=CPN60 PE=1 SV=2	1	20.67	20.6697	20.5711	20.5435	20.8293	20.8413	20.9978	20.7898	20.477	20.5701	20.6434	20.7154	20.5861	20.584	20.543	20.6673	20.4492	20.4961	20.3561	20.6376	20.6334	20.661	20.6853	20.7077	20.748	20.7502	20.6639	20.764	20.7028	20.5903	20.6771	39	70.7	61.28	577	0	323.31	20.6577	20.6504	20.5335	20.4986	20.7748	20.8217	20.982
Q9ZSJ6	Q9ZSJ6	Glycine-rich protein 3 short isoform	GRP3S	sp|Q9ZSJ6|GRP3S_ARATH Glycine-rich protein 3 short isoform OS=Arabidopsis thaliana GN=GRP3S PE=1 SV=2	1	17.1343	16.2753	16.7668	16.4852	16.6498	16.6073	16.8941	16.6545	17.1539	17.1068	17.2304	17.3025	16.3627	16.0727	16.7029	16.4114	15.9395	16.2804	16.3945	16.5678	16.4612	16.2566	16.0756	16.5274	16.4057	16.7725	16.448	16.0584	16.2978	16.0118	15.9395	6	70.7	11.586	116	0	201.85	16.8345	15.9685	16.4416	16.1529	16.3079	16.3002	16.5909
Q9SJQ0	Q9SJQ0	Pyruvate kinase	At2g36580	tr|Q9SJQ0|Q9SJQ0_ARATH Pyruvate kinase OS=Arabidopsis thaliana GN=At2g36580 PE=2 SV=2	1	18.7781	18.692	18.6404	18.4586	18.7367	18.6265	18.8109	18.6884	18.6145	18.6893	18.6229	18.6673	18.4696	18.4667	18.645	18.5424	18.4826	18.3858	18.273	18.5676	18.4971	18.4759	18.5871	18.0473	18.0186	18.1564	18.0603	18.647	18.4015	18.3874	18.5769	29	70.6	57.508	527	0	260.24	19.0921	18.999	18.929	18.74	19.0086	18.9331	19.1214
P29514	P29514	Tubulin beta-6 chain	TUBB6	sp|P29514|TBB6_ARATH Tubulin beta-6 chain OS=Arabidopsis thaliana GN=TUBB6 PE=2 SV=1	1	18.6845	18.6945	18.7121	18.7273	18.5554	18.6062	18.6147	18.646	18.3074	18.1117	18.2546	18.1313	18.6712	18.7182	18.62	18.6984	18.532	18.6406	18.6208	18.7198	18.7426	18.6969	18.7761	18.607	18.515	18.5059	18.6745	18.6965	18.8605	18.8033	18.8023	25	70.6	50.585	449	0	315.25	18.7849	18.7878	18.7871	18.795	18.6136	18.6992	18.7115
Q9LHH7	Q9LHH7	Bifunctional protein FolD 2;Methylenetetrahydrofolate dehydrogenase;Methenyltetrahydrofolate cyclohydrolase	FOLD2	sp|Q9LHH7|FOLD2_ARATH Bifunctional protein FolD 2 OS=Arabidopsis thaliana GN=FOLD2 PE=2 SV=1	1	18.8764	18.9385	18.9286	18.9837	19.0427	19.0282	18.9672	19.0892	19.3932	19.6857	19.6623	19.7956	19.0786	19.05	19.0015	19.0138	19.0775	19.1479	19.2967	19.3464	19.3269	19.3651	19.3502	19.016	19.0374	19.01	19.1873	19.1569	19.4531	19.4922	19.2537	18	70.6	31.589	299	0	136.39	18.8979	18.953	18.9247	18.9726	19.0221	19.0423	18.9852
Q9C5M0	Q9C5M0	Mitochondrial dicarboxylate/tricarboxylate transporter DTC	DTC	sp|Q9C5M0|DTC_ARATH Mitochondrial dicarboxylate/tricarboxylate transporter DTC OS=Arabidopsis thaliana GN=DTC PE=1 SV=1	1	18.9575	19.1472	19.0845	19.1807	19.2261	19.1961	19.0865	19.1496	19.567	19.7431	19.6196	19.7744	19.3024	19.3705	19.2925	19.1539	19.2444	19.1874	19.3298	18.9963	19.2846	19.1294	18.9675	20.1374	20.1086	19.8546	19.9317	19.3568	19.084	19.1712	19.1628	21	70.5	31.912	298	0	323.31	18.7741	18.9568	18.8757	18.9647	19.0006	19.0053	18.8996
Q9C820	Q9C820	Ras-related protein RABG3d	RABG3D	sp|Q9C820|RAG3D_ARATH Ras-related protein RABG3d OS=Arabidopsis thaliana GN=RABG3D PE=2 SV=1	1	16.3647	16.4163	16.3666	16.2589	16.3478	16.3938	16.3238	16.2843	16.4298	16.6816	16.4734	16.5373	16.5369	16.4389	16.392	16.3367	16.3796	16.3797	16.3334	16.2201	16.356	16.2721	16.2105	17.0148	17.075	16.9711	16.9874	16.3933	16.2345	16.3325	16.3522	12	70.4	23.069	206	0	63.215	16.4085	16.4531	16.385	16.2701	16.3494	16.4302	16.3641
Q9SEI2	Q9SEI2	26S protease regulatory subunit 6A homolog A	RPT5A	sp|Q9SEI2|PS6AA_ARATH 26S protease regulatory subunit 6A homolog A OS=Arabidopsis thaliana GN=RPT5A PE=1 SV=1	1	20.1952	20.2146	20.213	20.1992	20.2557	20.2231	20.2877	20.2471	19.9884	19.8527	19.9199	19.8577	20.1205	20.1673	20.1637	20.2337	20.0486	20.1759	20.1472	20.3169	20.203	20.286	20.3155	20.0767	20.1344	20.1911	20.1064	20.0502	20.1815	20.256	20.1805	30	70.3	47.48	424	0	323.31	20.2467	20.259	20.239	20.218	20.265	20.2672	20.3356
O24653	O24653	Guanosine nucleotide diphosphate dissociation inhibitor 2	GDI2	sp|O24653|GDI2_ARATH Guanosine nucleotide diphosphate dissociation inhibitor 2 OS=Arabidopsis thaliana GN=GDI2 PE=2 SV=1	1	19.8243	19.9769	19.7881	19.793	19.9445	19.9291	19.7993	19.8149	19.7654	19.82	19.8009	19.7993	19.9383	19.8333	19.8257	19.9239	19.8505	19.8043	19.7939	19.8746	19.9523	19.873	19.8692	19.9018	19.9571	19.9237	19.9176	19.7754	19.8427	19.8648	19.8664	23	70.3	49.538	444	0	323.31	19.908	20.0536	19.8464	19.8441	19.9861	20.0054	19.8795
Q01525	Q01525	14-3-3-like protein GF14 omega	GRF2	sp|Q01525|14332_ARATH 14-3-3-like protein GF14 omega OS=Arabidopsis thaliana GN=GRF2 PE=2 SV=2	1	18.2489	18.3015	18.0428	17.9748	17.9995	18.0455	18.2213	18.0701	17.7022	17.4114	17.5384	17.4721	18.1939	18.141	18.0039	18.0636	18.0382	17.8102	17.7161	17.8827	18.0114	17.9189	17.9227	18.0642	17.9344	17.9082	17.9806	18.2124	18.0667	17.8768	18.0148	16	70.3	29.161	259	0	247.91	18.5779	18.6235	18.3464	18.2712	18.2864	18.3672	18.5468
Q9SRZ6	Q9SRZ6	Cytosolic isocitrate dehydrogenase [NADP]	CICDH	sp|Q9SRZ6|ICDHC_ARATH Cytosolic isocitrate dehydrogenase [NADP] OS=Arabidopsis thaliana GN=CICDH PE=2 SV=1	1	20.5218	20.5995	20.5647	20.6073	20.3512	20.3363	20.2826	20.448	20.4622	20.0674	20.0788	20.2194	20.5933	20.4099	20.3614	20.5508	20.6848	20.4986	20.3579	20.5344	20.5373	20.5414	20.6429	19.985	19.9563	20.1255	20.0346	20.6676	20.7336	20.755	20.7227	30	70.2	45.746	410	0	323.31	20.4597	20.5304	20.4771	20.5126	20.2469	20.2668	20.2169
P49204;Q93VH9	P49204;Q93VH9	40S ribosomal protein S4-2;40S ribosomal protein S4-1	RPS4B;RPS4A	sp|P49204|RS42_ARATH 40S ribosomal protein S4-2 OS=Arabidopsis thaliana GN=RPS4B PE=2 SV=4;sp|Q93VH9|RS41_ARATH 40S ribosomal protein S4-1 OS=Arabidopsis thaliana GN=RPS4A PE=2 SV=1	2	21.9088	21.8464	21.8787	21.8265	21.7286	21.6745	21.7653	21.7787	21.6817	21.6429	21.7512	21.6894	21.7319	21.7907	21.7515	21.6972	21.5713	21.5804	21.6536	21.6254	21.5414	21.5074	21.5179	21.5868	21.5798	21.5824	21.6322	21.4425	21.3635	21.4375	21.2917	27	70.2	29.874	262	0	188.69	21.8539	21.7844	21.7983	21.739	21.6315	21.6122	21.7068
Q94AK8	Q94AK8		At1g25260	tr|Q94AK8|Q94AK8_ARATH Putative uncharacterized protein At1g25260 OS=Arabidopsis thaliana GN=At1g25260 PE=1 SV=1	1	18.7727	18.6952	18.7701	18.7834	18.7301	18.7962	18.8828	18.8234	18.8082	18.7451	18.8237	18.8157	18.6913	18.6341	18.8052	18.7444	18.6523	18.746	18.7248	18.72	18.6543	18.7521	18.6384	18.5111	18.5744	18.5207	18.5012	18.5161	18.4524	18.5986	18.4655	19	70.2	27.242	235	0	246.46	18.8158	18.7312	18.7877	18.7939	18.731	18.8318	18.9222
Q9LUK2	Q9LUK2	60S acidic ribosomal protein P2-5	RPP2E	sp|Q9LUK2|RLA25_ARATH 60S acidic ribosomal protein P2-5 OS=Arabidopsis thaliana GN=RPP2E PE=3 SV=1	1	15.5598	15.4353	15.5509	15.7179	15.5782	15.8658	15.834	15.7809	15.6001	15.3642	15.5233	15.4224	15.7337	15.8195	15.5808	15.8111	15.8021	15.8372	15.7978	15.8454	15.8949	15.8105	15.9255	15.594	15.6564	15.7455	15.9546	16.0407	16.1739	16.1012	15.9512	5	70.2	11.759	114	0	32.593	17.3667	17.2351	17.3323	17.4922	17.3428	17.6652	17.6373
Q84M92;Q9C9B2	Q84M92	Actin-related protein 4	ARP4	sp|Q84M92|ARP4_ARATH Actin-related protein 4 OS=Arabidopsis thaliana GN=ARP4 PE=1 SV=1	2	19.0782	19.0699	19.0684	19.0396	18.8933	18.9985	19.0599	19.0742	18.5686	18.4968	18.6409	18.5581	18.9589	19.0016	18.9943	19.0379	18.6897	18.7379	18.6666	19.0185	19.0087	19.0362	19.1125	18.6784	18.6085	18.7276	18.7474	19.0414	19.1278	18.9826	19.0433	24	70.1	48.936	441	0	323.31	18.8329	18.8177	18.7978	18.7618	18.6059	18.7458	18.8111
F4K6N0	F4K6N0		Tudor1	tr|F4K6N0|F4K6N0_ARATH TUDOR-SN protein 1 OS=Arabidopsis thaliana GN=Tudor1 PE=1 SV=1	1	21.4682	21.4574	21.4773	21.4685	21.5077	21.4561	21.487	21.4923	21.4645	21.4969	21.5081	21.4522	21.3451	21.3569	21.478	21.393	21.3912	21.4986	21.5566	21.4566	21.3148	21.4331	21.4301	21.2874	21.3434	21.4035	21.304	21.2202	21.2303	21.3079	21.2514	64	70	110.05	1007	0	323.31	21.4712	21.4534	21.4548	21.4389	21.4686	21.4517	21.4864
Q9FRL8	Q9FRL8	Glutathione S-transferase DHAR2	DHAR2	sp|Q9FRL8|DHAR2_ARATH Glutathione S-transferase DHAR2 OS=Arabidopsis thaliana GN=DHAR2 PE=1 SV=1	1	17.8556	18.0877	17.6489	17.4876	17.9203	17.9291	18.1108	17.7329	17.9057	18.1793	18.1407	18.518	17.5896	17.5242	17.5238	17.6704	17.5112	17.3028	17.1761	17.2985	17.4673	17.3243	17.3367	17.1216	17.103	17.2476	17.167	17.6753	17.6361	17.3063	17.6034	14	70	23.407	213	0	132.76	17.9307	18.1558	17.6986	17.5302	17.9533	17.9968	18.1824
Q9SEI3	Q9SEI3	26S protease regulatory subunit 10B homolog A	RPT4A	sp|Q9SEI3|PS10A_ARATH 26S protease regulatory subunit 10B homolog A OS=Arabidopsis thaliana GN=RPT4A PE=1 SV=1	1	19.6048	19.6256	19.5948	19.6093	19.6286	19.5837	19.6786	19.6109	19.3812	19.2617	19.3717	19.3137	19.5343	19.5872	19.5286	19.5942	19.5	19.636	19.5819	19.698	19.617	19.6469	19.7148	19.5514	19.5841	19.6336	19.5774	19.5116	19.5467	19.6362	19.5885	28	69.9	44.816	399	0	323.31	19.5967	19.6105	19.5613	19.5686	19.5783	19.5682	19.667
Q9FKS0	Q9FKS0	Uridine kinase-like protein 1, chloroplastic;Uridine kinase;Putative uracil phosphoribosyltransferase	UKL1	sp|Q9FKS0|UKL1_ARATH Uridine kinase-like protein 1, chloroplastic OS=Arabidopsis thaliana GN=UKL1 PE=1 SV=1	1	18.6608	18.7046	18.7287	18.8496	18.7051	18.6502	18.6153	18.6837	18.8543	18.8528	18.8431	18.7845	18.7821	18.8173	18.7227	18.7831	18.675	18.7885	18.8195	18.8558	18.8093	18.839	18.7978	18.8659	18.8808	18.948	18.8751	18.6193	18.6372	18.816	18.7401	28	69.8	54.429	486	0	323.31	18.7585	18.7953	18.801	18.9147	18.7607	18.7405	18.7095
Q96318	Q96318	12S seed storage protein CRC;12S seed storage protein CRC alpha chain;12S seed storage protein CRC beta chain	CRC	sp|Q96318|CRU3_ARATH 12S seed storage protein CRC OS=Arabidopsis thaliana GN=CRC PE=1 SV=1	1	18.349	18.957	18.579	18.5472	19.1065	19.3857	19.607	18.5679	19.2412	18.7608	18.3897	18.5087	19.786	19.7575	19.2322	19.5286	20.1728	20.007	20.2404	18.9869	18.7047	19.3318	19.7382	17.8694	17.9223	17.9598	18.0302	17.9469	18.0085	17.9686	18.0051	25	69.8	58.235	524	0	323.31	18.526	19.127	18.7306	18.6916	19.2414	19.5554	19.7805
Q9SA52	Q9SA52	Chloroplast stem-loop binding protein of 41 kDa b, chloroplastic	CSP41B	sp|Q9SA52|CP41B_ARATH Chloroplast stem-loop binding protein of 41 kDa b, chloroplastic OS=Arabidopsis thaliana GN=CSP41B PE=1 SV=1	1	19.9794	19.8456	19.9137	20.1074	19.6975	19.9553	19.8578	19.8769	19.8657	20.0026	20.0541	20.0091	20.2071	20.0843	19.8852	19.9222	19.7252	19.7779	19.988	20.0146	20.1124	20.1779	20.2509	20.0461	19.898	19.8161	20.2038	20.3479	20.3618	19.9668	20.0913	20	69.8	42.619	378	0	323.31	19.803	19.6622	19.7119	19.8984	19.4789	19.7715	19.6778
O04905	O04905	UMP-CMP kinase 3	UMK3	sp|O04905|KCY3_ARATH UMP-CMP kinase 3 OS=Arabidopsis thaliana GN=UMK3 PE=1 SV=1	1	18.2705	18.3281	18.1923	18.1431	18.2959	18.3877	18.3729	18.2284	18.1136	18.123	18.1117	18.2081	18.198	18.2334	18.2309	18.2486	18.4078	18.2766	18.1576	18.1553	18.3266	18.0812	18.1604	18.4109	18.4788	18.4571	18.4006	18.4474	18.3868	18.3058	18.3389	16	69.8	22.481	202	0	67.622	18.5102	18.5608	18.4066	18.3502	18.4935	18.62	18.6091
Q8LAD0	Q8LAD0	Probable pyridoxal 5-phosphate synthase subunit PDX2	PDX2	sp|Q8LAD0|PDX2_ARATH Probable pyridoxal 5-phosphate synthase subunit PDX2 OS=Arabidopsis thaliana GN=PDX2 PE=1 SV=1	1	16.6689	16.6464	16.8078	16.7875	16.852	16.8345	16.7187	16.8037	16.7733	16.7032	16.7208	16.7555	16.7242	16.7171	16.8001	16.7084	16.8546	16.9155	16.8898	16.8922	16.9105	16.8413	16.8123	16.5423	16.5827	16.603	16.5755	16.7242	16.7303	16.8996	16.7572	12	69.8	27.438	255	0	146.3	16.3905	16.3609	16.5039	16.4765	16.5314	16.5486	16.4367
Q9SZY1	Q9SZY1	Nascent polypeptide-associated complex subunit alpha-like protein 4		sp|Q9SZY1|NACA4_ARATH Nascent polypeptide-associated complex subunit alpha-like protein 4 OS=Arabidopsis thaliana GN=At4g10480 PE=1 SV=1	1	20.4629	20.3513	20.4088	20.3546	20.329	20.3176	20.3528	20.4096	20.2624	20.2585	20.368	20.3708	20.2811	20.3234	20.4475	20.3611	20.1161	20.1827	20.2197	20.2212	20.0944	20.0936	20.0557	20.1263	20.1263	20.0822	20.1286	19.6715	19.6412	19.7791	19.5445	12	69.8	23.171	212	0	323.31	20.452	20.3334	20.3725	20.3111	20.2759	20.2993	20.3383
F4JVV4	F4JVV4		At4g32930	tr|F4JVV4|F4JVV4_ARATH Uncharacterized protein OS=Arabidopsis thaliana GN=At4g32930 PE=4 SV=1	1	18.2871	18.2511	18.1677	18.1663	18.0392	18.0436	18.0732	18.2071	17.9481	17.9276	18.0329	18.0226	18.0719	18.1505	18.169	18.078	17.9183	17.9084	17.9068	18.234	18.2663	18.1193	18.1243	17.8777	17.8181	17.7631	17.9239	18.0908	18.0347	18.132	17.9946	10	69.7	19.265	175	0	61.501	19.5114	19.4685	19.3666	19.3581	19.2214	19.2606	19.2939
Q9LZX1	Q9LZX1	Protein LURP-one-related 15		sp|Q9LZX1|LOR15_ARATH Protein LURP-one-related 15 OS=Arabidopsis thaliana GN=At5g01750 PE=1 SV=1	1	17.8628	18.0153	17.9133	17.925	17.7988	17.8861	17.8261	17.904	17.8263	17.8645	17.8446	17.8784	17.9986	18.0253	17.9777	17.9117	17.994	17.9486	17.9854	17.8695	17.8898	17.9475	17.8588	18.0874	18.1173	18.0726	18.0279	17.8724	17.8301	17.8177	17.8879	14	69.6	24.295	217	0	187.8	18.4204	18.5658	18.4455	18.45	18.3142	18.4363	18.3802
Q9LH85	Q9LH85	60S acidic ribosomal protein P2-3	RPP2C	sp|Q9LH85|RLA23_ARATH 60S acidic ribosomal protein P2-3 OS=Arabidopsis thaliana GN=RPP2C PE=1 SV=1	1	14.0979	14.1916	14.1404	14.2392	14.1754	14.0253	13.9908	14.1557	14.2632	14.1067	14.2185	14.3932	14.0962	14.1055	14.0111	14.1454	14.1985	14.1884	14.1083	14.1597	14.1831	14.1936	14.2514	15.3126	15.3714	15.2968	15.4535	13.8996	13.9959	14.1153	14.2003	5	69.6	11.735	115	0	25.815	14.0645	14.1512	14.0816	14.1731	14.0998	13.9845	13.9538
Q9FLT0	Q9FLT0		Tudor2	tr|Q9FLT0|Q9FLT0_ARATH 100 kDa coactivator-like protein OS=Arabidopsis thaliana GN=Tudor2 PE=1 SV=1	1	21.0645	21.0486	21.0484	20.9951	21.0653	21.0058	21.0472	21.0468	20.9628	20.9545	20.986	20.9263	20.8866	20.8813	20.995	20.9479	20.8427	20.9585	21.0245	20.9659	20.7919	20.8956	20.9281	20.7498	20.821	20.9099	20.7304	20.6608	20.7194	20.7023	20.7049	62	69.5	107.74	985	0	323.31	21.2946	21.2717	21.253	21.1926	21.2533	21.2285	21.2737
Q9SZD4	Q9SZD4	26S proteasome regulatory subunit 4 homolog A	RPT2A	sp|Q9SZD4|PRS4A_ARATH 26S proteasome regulatory subunit 4 homolog A OS=Arabidopsis thaliana GN=RPT2A PE=1 SV=1	1	20.1617	20.1724	20.1026	20.1006	20.1578	20.1348	20.2667	20.1834	19.887	19.7583	19.8252	19.7556	20.0661	20.1039	20.0911	20.1275	19.9128	20.0088	19.9929	20.151	20.0532	20.1117	20.149	19.9903	20.0104	20.0345	19.9834	19.9387	20.0507	20.1116	20.0075	32	69.5	49.369	443	0	323.31	20.3482	20.3519	20.2636	20.2544	20.3021	20.3138	20.4496
Q9LSB4	Q9LSB4	TSA1-like protein	NAI2	sp|Q9LSB4|NAI2_ARATH TSA1-like protein OS=Arabidopsis thaliana GN=NAI2 PE=1 SV=1	1	20.8118	20.9169	20.739	20.6127	20.6936	20.7694	20.6669	20.7195	20.3483	20.1941	20.2818	20.4197	20.7845	20.6778	20.6558	20.7483	20.4671	20.2651	20.1471	20.5232	20.6142	20.5654	20.6184	20.4056	20.3026	20.347	20.3535	20.7799	20.6336	20.3028	20.5152	56	69.4	85.015	772	0	323.31	20.9572	21.0553	20.859	20.7256	20.7969	20.9075	20.8088
P41377	P41377	Eukaryotic initiation factor 4A-2	TIF4A-2	sp|P41377|IF4A2_ARATH Eukaryotic initiation factor 4A-2 OS=Arabidopsis thaliana GN=TIF4A-2 PE=1 SV=1	1	20.9655	20.9356	20.963	20.9203	20.9767	20.9462	20.8916	21.0105	20.8517	20.7031	20.7338	20.8005	20.9049	20.8575	20.9	20.8683	20.8496	20.8914	20.8308	20.9343	20.9058	20.872	20.9108	20.6993	20.6687	20.8209	20.7223	20.7495	20.7191	20.9116	20.8343	30	69.4	46.762	412	0	323.31	21.1909	21.154	21.1631	21.1132	21.16	21.1642	21.1135
Q9XEE2	Q9XEE2	Annexin D2	ANN2	sp|Q9XEE2|ANXD2_ARATH Annexin D2 OS=Arabidopsis thaliana GN=ANN2 PE=1 SV=1	1	19.2791	19.4341	19.2378	19.1595	19.4219	19.2959	19.2271	19.1154	19.5448	19.6341	19.5154	19.575	19.3376	19.2868	19.3393	19.2827	19.1441	19.0749	18.9787	18.9164	19.0389	19.0891	18.9867	19.5141	19.5826	19.3679	19.2595	19.3421	19.0091	19.1326	19.1748	19	69.4	36.266	317	0	323.31	19.1012	19.2492	19.0344	18.949	19.2018	19.1105	19.0456
Q9SL67	Q9SL67	26S proteasome regulatory subunit 4 homolog B	RPT2B	sp|Q9SL67|PRS4B_ARATH 26S proteasome regulatory subunit 4 homolog B OS=Arabidopsis thaliana GN=RPT2B PE=1 SV=1	1	15.1617	15.2065	15.0922	15.1454	15.198	15.1775	15.2874	15.1233	14.9237	14.4738	14.7736	14.737	15.2368	15.1096	15.0902	15.1761	15.0461	15.1869	15.0928	15.0946	15.1624	15.2206	15.231	15.0901	15.185	15.185	15.1351	15.1393	15.2064	15.2476	15.2683	29	69.3	49.346	443	0	18.21	14.4647	14.5025	14.3697	14.4158	14.4589	14.4731	14.5868
P93819	P93819	Malate dehydrogenase, cytoplasmic 1	MDH1	sp|P93819|MDHC1_ARATH Malate dehydrogenase, cytoplasmic 1 OS=Arabidopsis thaliana GN=MDH1 PE=1 SV=2	1	20.1115	19.9741	20.0609	20.0332	20.0678	20.0874	20.0924	20.1308	20.2994	19.8232	19.8124	19.8951	20.0907	20.0364	20.0632	20.1265	20.4068	20.293	20.1457	20.1524	20.0712	20.0762	20.0907	20.0584	19.986	20.0586	20.0043	20.3595	20.3588	20.4025	20.3642	21	69.3	35.571	332	0	323.31	20.3022	20.1577	20.2261	20.1912	20.2163	20.2706	20.2795
Q8L7B5	Q8L7B5	Chaperonin CPN60-like 1, mitochondrial		sp|Q8L7B5|CH60B_ARATH Chaperonin CPN60-like 1, mitochondrial OS=Arabidopsis thaliana GN=At2g33210 PE=2 SV=1	1	19.3731	19.3566	19.2576	19.2083	19.464	19.4755	19.6571	19.4108	19.1433	19.2811	19.3139	19.3999	19.3189	19.2489	19.245	19.3481	19.16	19.2561	19.0584	19.3738	19.366	19.3778	19.405	19.3994	19.4729	19.44	19.3767	19.4755	19.4064	19.308	19.3532	38	69.2	61.978	585	0	323.31	19.3063	19.2828	19.1654	19.1089	19.355	19.4012	19.5867
Q9FLX7	Q9FLX7	Probable NADH dehydrogenase [ubiquinone] 1 alpha subcomplex subunit 5, mitochondrial		sp|Q9FLX7|NDUA5_ARATH Probable NADH dehydrogenase [ubiquinone] 1 alpha subcomplex subunit 5, mitochondrial OS=Arabidopsis thaliana GN=At5g52840 PE=1 SV=1	1	17.7808	18.0398	18.0143	18.1937	18.0911	17.972	17.938	18.0202	18.6128	18.9036	18.7725	18.8948	18.2387	18.3734	18.303	18.2337	18.2694	18.1755	18.2966	18.263	18.498	18.4188	18.2503	19.0106	18.9697	18.6485	18.7682	18.3324	18.2209	18.3045	18.283	12	69.2	19.179	169	0	88.261	17.8105	18.0626	18.0186	18.1908	18.0787	17.9944	17.9642
Q9LW52;F4JUP8	Q9LW52		At3g23450	tr|Q9LW52|Q9LW52_ARATH Uncharacterized protein OS=Arabidopsis thaliana GN=At3g23450 PE=4 SV=1	2	18.155	18.0876	18.2156	18.3587	18.3814	18.1859	18.0548	18.0839	18.418	18.1687	18.1706	18.2394	18.3855	18.1705	18.0873	18.1884	18.2187	18.1947	18.4884	17.9017	17.9976	18.3563	17.9657	18.4626	18.44	18.4146	18.555	18.1645	18.4551	18.0327	18.4003	8	69.2	34.865	452	0	154.17	17.7479	17.6734	17.7831	17.919	17.9321	17.7714	17.6441
Q682T9;P0DH98;P0DH97;P59220	Q682T9;P0DH98;P0DH97;P59220	Calmodulin-5;Calmodulin-3;Calmodulin-2;Calmodulin-7	CAM5;CAM3;CAM2;CAM7	sp|Q682T9|CALM5_ARATH Calmodulin-5 OS=Arabidopsis thaliana GN=CAM5 PE=1 SV=1;sp|P0DH98|CALM3_ARATH Calmodulin-3 OS=Arabidopsis thaliana GN=CAM3 PE=1 SV=1;sp|P0DH97|CALM2_ARATH Calmodulin-2 OS=Arabidopsis thaliana GN=CAM2 PE=1 SV=1;sp|P59220|CALM7_ARATH Cal	4	18.2679	18.2697	18.2341	18.265	18.1344	18.0725	18.2269	18.204	18.3122	18.2176	18.3003	18.3197	18.3743	18.3107	18.1736	18.2663	18.3055	18.2664	18.1077	18.1529	18.1851	18.1724	18.193	18.5733	18.5367	18.5522	18.4753	18.2739	18.2315	18.1762	18.2126	10	69.1	16.819	149	0	135.04	18.7095	18.7043	18.6503	18.674	18.5338	18.5066	18.6649
Q9LUJ9;F4JJ97	Q9LUJ9		At5g40080	tr|Q9LUJ9|Q9LUJ9_ARATH At5g40080 OS=Arabidopsis thaliana GN=At5g40080 PE=2 SV=1	2	15.7473	15.479	15.6178	15.5465	15.6547	15.6214	15.7123	15.657	15.8067	15.9613	16.0405	16.1265	15.5238	15.5582	15.7192	15.664	15.4356	15.5618	15.4216	15.5842	15.6916	15.6273	15.6867	15.6183	15.4769	15.5549	15.5562	15.5305	15.5935	15.4196	15.4856	6	69.1	10.46	94	0	9.5229	15.9554	15.6801	15.8005	15.722	15.8207	15.8221	15.9168
Q9LZ82	Q9LZ82	Protein BTR1	BTR1	sp|Q9LZ82|BTR1_ARATH Protein BTR1 OS=Arabidopsis thaliana GN=BTR1 PE=1 SV=1	1	19.8289	19.7176	19.6903	19.5472	19.5082	19.5159	19.539	19.4856	19.5316	19.4163	19.3667	19.3208	19.6313	19.5144	19.5704	19.5787	19.5557	19.506	19.5309	19.2332	19.1972	19.1998	19.2464	19.4435	19.4428	19.58	19.46	19.14	19.0609	18.8841	19.0665	18	69	33.82	313	0	297.67	19.5577	19.4394	19.3937	19.2434	19.1949	19.2373	19.2643
O23717	O23717	Proteasome subunit beta type-5-A	PBE1	sp|O23717|PSB5A_ARATH Proteasome subunit beta type-5-A OS=Arabidopsis thaliana GN=PBE1 PE=1 SV=1	1	19.1529	18.9841	18.923	18.7039	19.1734	19.1569	19.4441	19.1067	18.7039	18.5902	18.7272	18.7054	18.8189	18.78	18.8754	18.9261	18.6421	18.6429	18.5136	18.8396	18.7892	18.7981	18.8336	19.0058	19.0745	19.0488	18.8964	18.7362	18.6605	18.5519	18.6857	13	69	29.667	274	0	323.31	19.0122	18.8364	18.7569	18.5307	18.9906	19.0088	19.2999
Q9LU05	Q9LU05	Plasma membrane-associated cation-binding protein 2	PCAP2	sp|Q9LU05|PCAP2_ARATH Plasma membrane-associated cation-binding protein 2 OS=Arabidopsis thaliana GN=PCAP2 PE=1 SV=1	1	18.1162	18.1413	18.0894	17.7721	17.8946	17.415	17.5817	17.762	17.2343	17.0091	17.2019	16.9747	18.1827	18.0254	18.0795	17.9791	17.6371	17.8698	17.7438	17.8735	17.9281	17.4687	17.5566	18.2794	18.0838	17.8128	18.061	17.7986	17.6372	17.6718	17.7132	12	69	18.549	168	0	32.521	17.9932	18.0113	17.941	17.6165	17.7294	17.2846	17.4552
Q93Y31	Q93Y31		K9I9.13	tr|Q93Y31|Q93Y31_ARATH ADP-ribosylation factor-like A1D OS=Arabidopsis thaliana GN=K9I9.13 PE=2 SV=1	1	17.0048	17.0158	17.021	16.9642	17.1143	16.9975	16.9833	17.0004	17.05	17.133	17.1464	17.1027	17.1334	17.1443	17.0688	17.0301	17.0906	17.0547	16.9637	16.9469	17.0633	16.9882	16.9401	17.6685	17.6569	17.6181	17.6382	17.1496	16.9653	16.9847	17.0331	9	69	20.403	184	0	103.86	17.313	17.317	17.3038	17.2398	17.3803	17.2983	17.288
Q9M2D8	Q9M2D8	Uncharacterized protein At3g61260		sp|Q9M2D8|Y3126_ARATH Uncharacterized protein At3g61260 OS=Arabidopsis thaliana GN=At3g61260 PE=1 SV=1	1	19.0735	19.1668	19.1419	19.259	18.8391	18.6712	18.8197	18.839	18.8696	18.8099	18.9072	18.6501	19.4835	19.4699	19.173	19.2269	19.0016	18.9772	19.0236	18.9753	19.0426	19.0866	18.9739	19.5351	19.4454	19.3286	19.652	19.1344	19.1497	18.9311	19.0846	18	68.9	23.144	212	0	96.458	19.0847	19.171	19.1276	19.2376	18.8081	18.675	18.8274
Q8LD03	Q8LD03	40S ribosomal protein S7-3	RPS7C	sp|Q8LD03|RS73_ARATH 40S ribosomal protein S7-3 OS=Arabidopsis thaliana GN=RPS7C PE=1 SV=2	1	20.5232	20.4529	20.4578	20.3822	20.3738	20.2892	20.3905	20.4038	20.2638	20.1958	20.3041	20.2301	20.3125	20.3356	20.3845	20.2694	20.1868	20.2084	20.2282	20.2435	20.1698	20.1282	20.1304	20.2209	20.1793	20.2104	20.2235	20.0433	20.0129	20.0521	19.8606	16	68.9	22.06	190	0	316.98	20.6529	20.5756	20.5622	20.4793	20.4613	20.4115	20.5167
Q9LW76	Q9LW76	Ras-related protein RABG3c	RABG3C	sp|Q9LW76|RAG3C_ARATH Ras-related protein RABG3c OS=Arabidopsis thaliana GN=RABG3C PE=2 SV=1	1	14.5654	14.547	14.4949	14.3585	14.5239	14.4814	14.4394	14.4369	14.4326	14.5439	14.4709	14.4229	14.545	14.4571	14.5607	14.4989	14.3266	14.4885	14.2753	14.3381	14.5241	14.3974	14.5124	14.6313	14.7811	14.7971	14.5484	14.6145	14.5949	14.5665	14.5889	12	68.9	22.966	206	0	23.731	15.6987	15.6733	15.6028	15.4593	15.615	15.6074	15.5691
Q9XI98	Q9XI98	Ras-related protein RABG3e	RABG3E	sp|Q9XI98|RAG3E_ARATH Ras-related protein RABG3e OS=Arabidopsis thaliana GN=RABG3E PE=2 SV=1	1	15.7719	15.8942	15.7606	15.7036	15.7516	15.819	15.7805	15.6928	15.8152	15.9008	15.8866	16.0095	15.8755	15.8947	15.8424	15.8598	15.7124	15.7602	15.745	15.6083	15.7788	15.719	15.6775	16.5256	16.5077	16.5639	16.486	15.7325	15.6048	15.6496	15.8899	12	68.9	22.98	206	0	77.494	15.8596	15.9749	15.8228	15.7587	15.7972	15.8993	15.8646
O80501;Q9SID8;Q9LV79	O80501	Ras-related protein RABH1b	RABH1B	sp|O80501|RAH1B_ARATH Ras-related protein RABH1b OS=Arabidopsis thaliana GN=RABH1B PE=1 SV=1	3	18.5824	18.65	18.6234	18.495	18.6865	18.6093	18.6596	18.5593	18.7082	18.7938	18.6957	18.6761	18.6032	18.5912	18.631	18.5771	18.6517	18.6016	18.5177	18.4511	18.5073	18.4832	18.3971	19.0381	19.1288	19.1209	18.981	18.5583	18.1977	18.423	18.4964	14	68.8	23.13	208	0	113.73	18.4969	18.5574	18.5124	18.3769	18.5588	18.5164	18.5706
Q9SI20	Q9SI20	Elongation factor 1-delta 2		sp|Q9SI20|EF1D2_ARATH Elongation factor 1-delta 2 OS=Arabidopsis thaliana GN=At2g18110 PE=1 SV=1	1	16.7374	16.8461	16.5838	16.8024	16.8119	16.9774	16.9465	16.7811	16.6657	16.5885	16.5744	16.6947	16.6791	16.7923	16.6977	16.8205	16.7226	16.5206	16.3519	16.9536	17.0185	16.9252	16.9995	16.7681	16.7239	16.7546	16.7121	17.1335	17.1435	17.0814	17.1453	14	68.8	25.266	231	0	169.92	16.632	16.7336	16.4529	16.6643	16.6643	16.8645	16.8375
Q9M084	Q9M084		At4g31180	sp|Q9M084|SYDC2_ARATH Aspartate--tRNA ligase 2, cytoplasmic OS=Arabidopsis thaliana GN=IBI1 PE=1 SV=1	1	19.9734	19.8629	19.9376	19.8453	19.9213	19.966	19.9196	19.8072	19.7875	19.5463	19.6538	19.4622	19.9348	19.7679	19.8723	19.8961	19.5418	19.5699	19.724	19.7723	19.6317	19.8037	19.9676	19.5768	19.586	19.4879	19.4736	19.7014	19.885	19.4927	19.8903	37	68.3	62.917	558	0	323.31	20.0579	19.9403	19.9966	19.8972	19.9635	20.043	20.0004
O80950	O80950	Jacalin-related lectin 22	JAL22	sp|O80950|JAL22_ARATH Jacalin-related lectin 22 OS=Arabidopsis thaliana GN=JAL22 PE=1 SV=1	1	19.7547	19.9996	19.684	19.6832	19.9085	19.8026	19.7186	19.7038	19.3849	19.4881	19.3792	19.1853	20.0255	19.7963	19.4582	19.7917	19.8184	19.4739	19.3379	19.5702	19.7437	19.7368	19.9436	19.4932	19.4974	19.4664	19.5324	19.9813	20.0455	19.6495	20.0576	27	68.3	50.462	458	0	323.31	19.7711	20.0089	19.675	19.667	19.8827	19.8116	19.7314
Q9M339	Q9M339	40S ribosomal protein S3-2	RPS3B	sp|Q9M339|RS32_ARATH 40S ribosomal protein S3-2 OS=Arabidopsis thaliana GN=RPS3B PE=1 SV=1	1	18.2985	18.2743	18.2948	18.1897	18.2353	18.1453	18.2451	18.1678	18.1059	18.1536	18.1678	18.1396	18.0986	18.1379	18.2964	18.2344	17.9929	17.9994	18.044	18.0891	17.9282	17.9119	17.9303	18.0241	18.0237	18.0556	18.0648	17.7985	17.7361	17.7863	17.6271	23	68.3	27.349	249	0	17.471	17.9171	17.8858	17.888	17.7756	17.8117	17.7565	17.8601
Q9SIF2	Q9SIF2		CR88	sp|Q9SIF2|HS905_ARATH Heat shock protein 90-5, chloroplastic OS=Arabidopsis thaliana GN=HSP90-5 PE=1 SV=1	1	20.436	20.5242	20.288	20.2339	20.3681	20.4332	20.3858	20.3387	19.9878	19.8129	19.7779	19.9391	20.3137	20.4042	20.3194	20.3998	20.4049	20.1137	19.9404	20.2975	20.4678	20.1939	20.3094	19.9123	19.8215	19.8475	19.8417	20.5908	20.3894	20.4333	20.3966	46	68.2	88.662	780	0	323.31	20.4951	20.5763	20.3217	20.2604	20.385	20.4849	20.4413
Q9SGC1	Q9SGC1	Probable phosphoglucomutase, cytoplasmic 2		sp|Q9SGC1|PGMC2_ARATH Probable phosphoglucomutase, cytoplasmic 2 OS=Arabidopsis thaliana GN=At1g70730 PE=2 SV=1	1	19.7155	19.7738	19.7401	19.7803	19.7809	19.899	19.6641	19.8072	19.4704	19.1187	19.1313	19.1288	19.739	19.6362	19.5946	19.6603	19.9719	19.7389	19.5122	19.7827	19.8945	19.6534	19.8476	18.9203	18.8055	18.9396	18.967	19.9637	19.9024	19.93	19.8792	35	68.2	63.481	585	0	323.31	19.7312	19.7824	19.7303	19.7633	19.7544	19.9072	19.6762
Q9MAK9	Q9MAK9	26S protease regulatory subunit S10B homolog B	RPT4B	sp|Q9MAK9|PS10B_ARATH 26S protease regulatory subunit S10B homolog B OS=Arabidopsis thaliana GN=RPT4B PE=1 SV=1	1	17.9612	17.8924	17.9366	17.9663	17.914	17.8934	18.0147	17.8845	17.6286	17.3494	17.5325	17.4736	17.7432	17.7982	17.8049	17.9551	17.5642	17.7036	17.5843	17.8237	17.8419	17.8568	17.8409	17.7357	17.7621	17.7597	17.626	17.6338	17.6924	17.8474	17.7664	28	68.2	44.755	399	0	25.219	18.2366	18.1607	18.1865	18.2091	18.1472	18.1614	18.2865
P46077	P46077	14-3-3-like protein GF14 phi	GRF4	sp|P46077|14334_ARATH 14-3-3-like protein GF14 phi OS=Arabidopsis thaliana GN=GRF4 PE=1 SV=2	1	20.0056	20.0159	19.819	19.7258	19.8537	19.9546	20.0217	19.8805	19.5677	19.4372	19.4411	19.424	19.9349	19.8539	19.7991	19.8424	19.7985	19.5809	19.5066	19.6929	19.8133	19.6697	19.7525	19.8191	19.7309	19.6773	19.721	19.9355	19.8493	19.6695	19.7695	18	68.2	30.194	267	0	240.37	20.0756	20.0789	19.8636	19.7632	19.8815	20.0171	20.0881
Q38922	Q38922	Ras-related protein RABB1b	RABB1B	sp|Q38922|RAB1B_ARATH Ras-related protein RABB1b OS=Arabidopsis thaliana GN=RABB1B PE=2 SV=1	1	16.003	16.0646	16.0074	15.8639	16.0577	15.9695	15.9628	15.8858	16.073	16.2459	16.1281	16.2269	16.0327	16.0183	16.075	15.9615	15.956	15.8931	15.8782	15.9004	15.8821	15.8418	15.734	16.5507	16.5964	16.5405	16.4912	15.9364	15.7487	15.807	15.8458	13	68.2	23.175	211	0	87.541	15.9456	16.0002	15.9246	15.7739	15.9581	15.9047	15.9019
Q9SZJ5	Q9SZJ5	Serine hydroxymethyltransferase 1, mitochondrial	SHM1	sp|Q9SZJ5|GLYM1_ARATH Serine hydroxymethyltransferase 1, mitochondrial OS=Arabidopsis thaliana GN=SHM1 PE=1 SV=1	1	21.127	21.0435	21.1194	21.3039	21.2315	21.456	21.298	21.2038	21.5269	21.9317	21.7648	21.6498	21.3086	21.1285	21.071	21.1244	21.3744	21.3287	21.4942	21.0946	21.1779	21.2119	21.253	21.0125	21.0506	21.0767	21.125	21.3324	21.3836	21.2177	21.286	33	68.1	57.4	517	0	323.31	20.8936	20.8031	20.8605	21.0378	20.956	21.2151	21.061
O04314	O04314	PYK10-binding protein 1	PBP1	sp|O04314|JAL30_ARATH PYK10-binding protein 1 OS=Arabidopsis thaliana GN=PBP1 PE=1 SV=1	1	20.7117	20.4809	20.2788	20.0658	20.7206	20.7539	20.6084	20.3429	20.2951	20.2675	20.1067	20.0087	20.5698	20.1886	20.1123	20.3423	20.6155	20.4146	20.1779	19.9559	19.9861	20.0388	20.1243	19.9008	19.9773	19.8843	19.9601	20.8549	20.6872	20.1161	20.6172	15	68.1	32.158	298	0	323.31	20.8231	20.5853	20.3647	20.1446	20.7898	20.8578	20.7162
P50883	P50883	60S ribosomal protein L12-1	RPL12A	sp|P50883|RL121_ARATH 60S ribosomal protein L12-1 OS=Arabidopsis thaliana GN=RPL12A PE=2 SV=2	1	15.1814	15.1238	15.2319	15.1861	15.0518	15.087	15.1488	15.1165	15.1295	15.0427	14.9922	14.9774	15.0338	15.1511	15.0274	15.0195	15.1605	15.3263	15.3145	15.2709	15.302	15.1417	15.3476	15.2965	15.1656	15.1766	15.258	15.0335	15.2102	15.1907	15.1194	10	68.1	17.942	166	0	37.613	15.8006	15.7359	15.8256	15.7726	15.6287	15.6987	15.7644
Q9FF52	Q9FF52	60S ribosomal protein L12-3	RPL12C	sp|Q9FF52|RL123_ARATH 60S ribosomal protein L12-3 OS=Arabidopsis thaliana GN=RPL12C PE=2 SV=1	1	17.8608	17.9068	17.8275	17.8585	17.7028	17.705	17.7521	17.8278	17.6971	17.6578	17.7754	17.7528	17.7513	17.8047	17.7015	17.7257	17.5814	17.5815	17.6855	17.7147	17.5517	17.5995	17.6324	17.653	17.6154	17.6322	17.5741	17.5574	17.5411	17.4182	17.2448	10	68.1	17.843	166	0	93.759	17.9711	18.0101	17.9124	17.9362	17.7709	17.8079	17.8589
Q9LFH5	Q9LFH5	60S ribosomal protein L12-2	RPL12B	sp|Q9LFH5|RL122_ARATH 60S ribosomal protein L12-2 OS=Arabidopsis thaliana GN=RPL12B PE=1 SV=1	1	20.3445	20.4503	20.2108	20.153	20.1573	20.2439	20.2755	20.3055	20.1236	20.0725	20.0821	20.1646	20.1886	20.3376	20.3035	20.253	19.9051	19.9883	20.062	20.0624	19.909	19.8902	19.9297	19.9393	19.8811	19.8885	19.9331	19.6639	19.7291	19.8149	19.5822	10	68.1	17.97	166	0	320.04	20.5798	20.6787	20.4207	20.3557	20.3505	20.4719	20.5073
O48802	O48802		At1g62390	tr|O48802|O48802_ARATH Carboxylate clamp-tetratricopeptide repeat protein OS=Arabidopsis thaliana GN=At1g62390 PE=1 SV=1	1	19.542	19.4451	19.4745	19.4317	19.4887	19.5236	19.5302	19.5411	19.7129	19.722	19.7422	19.8178	19.3564	19.3808	19.4889	19.4377	19.5957	19.583	19.6991	19.4955	19.45	19.4809	19.4035	19.1761	19.2421	19.489	19.2968	19.0564	19.1225	19.2688	19.1057	39	68	82.707	751	0	323.31	19.4787	19.3747	19.3857	19.3357	19.3832	19.4529	19.4633
Q93ZM7	Q93ZM7	Chaperonin CPN60-like 2, mitochondrial		sp|Q93ZM7|CH60C_ARATH Chaperonin CPN60-like 2, mitochondrial OS=Arabidopsis thaliana GN=At3g13860 PE=2 SV=2	1	19.7392	19.7382	19.6367	19.6533	19.8146	19.8066	19.9671	19.7927	19.5725	19.6286	19.6906	19.7186	19.7025	19.6953	19.7012	19.752	19.5528	19.5937	19.4641	19.7635	19.7792	19.7736	19.7833	19.8245	19.8729	19.829	19.7976	19.8622	19.8244	19.6826	19.742	34	68	60.466	572	0	323.31	19.7666	19.7586	19.6387	19.6481	19.7999	19.8266	19.9909
Q56WK6	Q56WK6	Patellin-1	PATL1	sp|Q56WK6|PATL1_ARATH Patellin-1 OS=Arabidopsis thaliana GN=PATL1 PE=1 SV=2	1	20.5291	20.6236	20.5539	20.6021	20.3857	20.2801	20.2969	20.4797	19.9901	19.7459	19.9817	19.6891	20.9928	20.8234	20.577	20.6968	20.2866	20.1482	20.2516	20.6307	20.6941	20.605	20.614	20.9585	20.7959	20.7152	20.9797	20.6972	20.7704	20.5495	20.6661	39	67.9	64.046	573	0	323.31	20.5954	20.6829	20.5948	20.6357	20.4098	20.339	20.3596
P29515	P29515	Tubulin beta-7 chain	TUBB7	sp|P29515|TBB7_ARATH Tubulin beta-7 chain OS=Arabidopsis thaliana GN=TUBB7 PE=2 SV=1	1	18.3892	18.4503	18.4309	18.5388	18.3234	18.3526	18.2941	18.3968	18.1637	17.8451	17.9124	17.8449	18.5182	18.542	18.3881	18.4535	18.43	18.4767	18.4819	18.6298	18.5871	18.6339	18.6615	18.408	18.3334	18.373	18.4351	18.4569	18.629	18.599	18.5917	28	67.9	50.747	449	0	323.31	18.3592	18.4133	18.3756	18.4763	18.2513	18.3153	18.2605
Q9LD43	Q9LD43	Acetyl-coenzyme A carboxylase carboxyl transferase subunit alpha, chloroplastic	CAC3	sp|Q9LD43|ACCA_ARATH Acetyl-coenzyme A carboxylase carboxyl transferase subunit alpha, chloroplastic OS=Arabidopsis thaliana GN=CAC3 PE=1 SV=1	1	21.2948	21.3115	21.4	21.6049	21.2215	21.1992	21.0873	21.264	21.3391	21.2058	21.3591	21.204	21.4473	21.5643	21.4253	21.4582	21.3276	21.4691	21.5424	21.4839	21.4369	21.4712	21.4114	21.4302	21.3158	21.3762	21.4141	21.3541	21.4976	21.5883	21.4925	52	67.8	85.305	769	0	323.31	21.3686	21.3783	21.4483	21.6461	21.2531	21.2656	21.1575
P83483;P83484;Q9C5A9	P83483;P83484;Q9C5A9	ATP synthase subunit beta-1, mitochondrial;ATP synthase subunit beta-2, mitochondrial;ATP synthase subunit beta-3, mitochondrial		sp|P83483|ATPBM_ARATH ATP synthase subunit beta-1, mitochondrial OS=Arabidopsis thaliana GN=At5g08670 PE=1 SV=1;sp|P83484|ATPBN_ARATH ATP synthase subunit beta-2, mitochondrial OS=Arabidopsis thaliana GN=At5g08690 PE=1 SV=1;sp|Q9C5A9|ATPBO_ARATH ATP syntha	3	20.4472	20.5442	20.5471	20.6564	20.5685	20.4975	20.486	20.6303	21.0216	21.2078	21.1564	21.2832	20.646	20.7978	20.7254	20.6043	20.6494	20.4652	20.608	20.7549	20.9355	20.7781	20.6926	21.3954	21.4224	21.1371	21.1777	20.7475	20.5961	20.5933	20.5778	27	67.8	59.67	556	0	323.31	20.4112	20.5013	20.4857	20.5878	20.4904	20.4541	20.4465
P60039	P60039	60S ribosomal protein L7-3	RPL7C	sp|P60039|RL73_ARATH 60S ribosomal protein L7-3 OS=Arabidopsis thaliana GN=RPL7C PE=2 SV=1	1	20.2308	20.1874	20.1802	20.1632	20.0987	20.0488	20.139	20.1583	20.0069	19.8971	20.0111	19.9592	20.0373	20.0533	20.1586	20.0958	19.9078	19.911	19.9425	19.8871	19.784	19.7693	19.7982	19.7863	19.8027	19.8062	19.8041	19.7285	19.6826	19.776	19.6212	26	67.8	27.939	242	0	323.31	20.0181	19.9676	19.9421	19.9178	19.8438	19.8286	19.9226
Q39258;Q9C9Z8	Q39258	V-type proton ATPase subunit E1	VHA-E1	sp|Q39258|VATE1_ARATH V-type proton ATPase subunit E1 OS=Arabidopsis thaliana GN=VHA-E1 PE=1 SV=2	2	20.1315	20.1056	19.9964	19.877	19.9819	19.9538	19.9639	20.0287	19.8443	19.983	19.9766	20.0788	20.0727	20.0885	20.0538	20.0793	19.9761	19.9261	19.7924	20.0148	19.9947	19.8995	19.9784	20.3564	20.3454	20.4217	20.3335	20.0885	20.052	20.0432	20.0774	19	67.8	26.06	230	0	181.49	20.3013	20.2683	20.1407	20.0141	20.1094	20.1162	20.1301
Q940P8	Q940P8	T-complex protein 1 subunit beta	CCT2	sp|Q940P8|TCPB_ARATH T-complex protein 1 subunit beta OS=Arabidopsis thaliana GN=CCT2 PE=1 SV=1	1	19.6077	19.5341	19.5489	19.5564	19.7833	19.8138	19.8447	19.7996	19.7949	19.8055	19.8103	19.6916	19.6044	19.5698	19.6058	19.6158	19.5785	19.6502	19.7492	19.8675	19.7593	19.9566	19.9816	19.509	19.5394	19.4661	19.4492	19.6393	19.8044	19.8533	19.7807	32	67.7	57.285	527	0	323.31	19.6614	19.5808	19.5772	19.5775	19.7949	19.8601	19.8948
Q94KE3	Q94KE3	Pyruvate kinase	At3g52990	tr|Q94KE3|Q94KE3_ARATH Pyruvate kinase OS=Arabidopsis thaliana GN=At3g52990 PE=2 SV=1	1	20.2866	20.1799	20.1689	19.9352	20.1664	20.0991	20.3461	20.1601	20.0315	20.1388	20.111	20.0057	19.9905	19.9514	20.0999	20.0564	19.8487	19.7934	19.7569	19.9448	19.8495	19.8451	19.958	19.5534	19.5295	19.6543	19.6045	19.9937	19.7614	19.7543	19.9389	29	67.6	57.495	527	0	323.31	20.1779	20.0642	20.0348	19.794	20.0156	19.983	20.2339
Q9LHP1	Q9LHP1	60S ribosomal protein L7-4	RPL7D	sp|Q9LHP1|RL74_ARATH 60S ribosomal protein L7-4 OS=Arabidopsis thaliana GN=RPL7D PE=2 SV=1	1	18.8406	18.881	18.8814	18.938	18.7886	18.7895	18.8328	18.8525	18.9474	18.8262	18.9569	18.9177	18.8718	18.9046	18.9408	18.9461	18.8076	18.8372	18.8754	18.7442	18.6965	18.7446	18.7047	18.7267	18.7265	18.724	18.7744	18.6895	18.6425	18.7438	18.6181	26	67.6	28.433	244	0	125.02	19.3593	19.3927	19.3746	19.4241	19.2651	19.3008	19.348
Q9SSS7	Q9SSS7		F6D8.2	tr|Q9SSS7|Q9SSS7_ARATH AT1G52730 protein OS=Arabidopsis thaliana GN=F6D8.2 PE=2 SV=1	1	18.4437	18.4152	18.4023	18.3046	18.3203	18.3186	18.3906	18.3957	18.1183	17.9492	18.0123	18.0098	18.2992	18.2887	18.3087	18.3425	18.1815	18.1111	18.1256	18.2955	18.3028	18.2411	18.2909	18.0429	18.0441	18.1028	18.0849	18.2068	18.199	18.173	18.2799	19	67.6	37.754	343	0	323.31	18.2325	18.197	18.1658	18.0608	18.067	18.1001	18.1759
P42794;P42795	P42794;P42795	60S ribosomal protein L11-2;60S ribosomal protein L11-1	RPL11B;RPL11A	sp|P42794|RL112_ARATH 60S ribosomal protein L11-2 OS=Arabidopsis thaliana GN=RPL11B PE=2 SV=2;sp|P42795|RL111_ARATH 60S ribosomal protein L11-1 OS=Arabidopsis thaliana GN=RPL11A PE=2 SV=2	2	21.6209	21.621	21.642	21.6415	21.5539	21.5292	21.548	21.6142	21.5172	21.4977	21.5638	21.5583	21.495	21.6017	21.6546	21.636	21.4564	21.5497	21.6214	21.5348	21.4942	21.4672	21.4637	21.4212	21.4749	21.4771	21.529	21.3052	21.3725	21.4874	21.3376	13	67.6	20.861	182	0	323.31	21.8319	21.8249	21.8275	21.8198	21.7227	21.7327	21.7554
Q9FJD0	Q9FJD0	Vacuolar protein sorting-associated protein 26A	VPS26A	sp|Q9FJD0|VP26A_ARATH Vacuolar protein sorting-associated protein 26A OS=Arabidopsis thaliana GN=VPS26A PE=2 SV=1	1	18.2072	18.1825	18.2411	18.1406	18.1208	17.988	18.0505	18.0272	18.394	18.5145	18.5478	18.4431	18.115	18.1307	18.125	18.1353	18.2182	18.267	18.2581	18.09	18.02	18.1381	18.1204	18.1753	18.1749	18.2181	18.1696	18.0444	17.9458	18.1176	18.1369	19	67.5	35.15	302	0	270.85	18.3795	18.3478	18.3879	18.2802	18.2509	18.1528	18.2192
P56798	P56798	30S ribosomal protein S3, chloroplastic	rps3	sp|P56798|RR3_ARATH 30S ribosomal protein S3, chloroplastic OS=Arabidopsis thaliana GN=rps3 PE=3 SV=1	1	20.2973	20.276	20.3631	20.4667	20.2666	20.0798	20.0846	20.3038	20.3759	20.2898	20.3995	20.2571	20.3587	20.5053	20.3521	20.3141	20.3523	20.4213	20.4488	20.5225	20.4645	20.4163	20.3496	20.4004	20.3612	20.3922	20.3974	20.1716	20.2401	20.4694	20.3513	21	67.4	25.188	218	0	190.45	20.2274	20.1992	20.2679	20.3642	20.1546	20.0025	20.0111
O81439;REV__F4JPE8	O81439	Probable plastid-lipid-associated protein 1, chloroplastic	PAP1	sp|O81439|PAP1_ARATH Probable plastid-lipid-associated protein 1, chloroplastic OS=Arabidopsis thaliana GN=PAP1 PE=1 SV=1	2	17.5599	17.7264	17.7057	17.9234	18.022	17.9817	18.0057	17.9889	18.1374	18.4272	18.3314	18.4894	17.8487	17.8949	17.6449	17.7794	17.9429	17.9305	17.8483	17.659	17.8022	17.918	17.8982	17.7643	17.7218	17.6766	17.7489	17.9922	17.9352	17.9572	17.9948	17	67.3	34.948	318	0	255.82	17.4141	17.5736	17.5345	17.745	17.834	17.8285	17.8564
Q8LEQ0	Q8LEQ0	60S acidic ribosomal protein P1-3	RPP1C	sp|Q8LEQ0|RLA13_ARATH 60S acidic ribosomal protein P1-3 OS=Arabidopsis thaliana GN=RPP1C PE=1 SV=2	1	19.901	19.804	19.9444	19.9103	19.8166	19.7989	19.8256	19.8673	19.7573	19.7434	19.8064	19.7895	19.7297	19.8333	19.9978	19.9464	19.7417	19.8839	19.8935	19.8629	19.7978	19.7395	19.6475	19.7723	19.752	19.7794	19.7538	19.4625	19.5469	19.7433	19.4404	6	67.3	11.247	113	0	323.31	20.576	20.4719	20.594	20.5526	20.4494	20.4664	20.497
P10795	P10795	Ribulose bisphosphate carboxylase small chain 1A, chloroplastic	RBCS-1A	sp|P10795|RBS1A_ARATH Ribulose bisphosphate carboxylase small chain 1A, chloroplastic OS=Arabidopsis thaliana GN=RBCS-1A PE=1 SV=2	1	21.1651	20.7666	20.8566	20.9177	21.0549	21.2496	21.2588	21.1671	20.7611	20.4317	20.6793	20.478	21.0546	21.0126	21.0783	21.0339	21.1508	21.1337	20.9856	21.24	21.238	21.1811	21.1908	21.2193	21.2007	21.2557	21.4399	21.5956	21.5562	21.3002	21.4089	14	67.2	20.216	180	0	214.79	21.4928	21.0873	21.1589	21.2128	21.3404	21.5699	21.583
Q9C920	Q9C920	3-deoxy-manno-octulosonate cytidylyltransferase, mitochondrial	KDSB	sp|Q9C920|KDSB_ARATH 3-deoxy-manno-octulosonate cytidylyltransferase, mitochondrial OS=Arabidopsis thaliana GN=KDSB PE=1 SV=1	1	17.4122	17.5719	17.5297	17.6174	17.6368	17.6173	17.5729	17.614	17.868	18.1692	17.9411	18.1012	17.704	17.6965	17.675	17.5708	17.7094	17.7405	17.8576	17.6131	17.7219	17.7677	17.6511	18.5092	18.5789	18.4024	18.4699	17.8198	17.76	17.6856	17.773	14	67.2	32.245	290	0	192.08	17.4285	17.5812	17.5206	17.6011	17.6109	17.6261	17.5856
Q42449	Q42449	Profilin-1	PRO1	sp|Q42449|PROF1_ARATH Profilin-1 OS=Arabidopsis thaliana GN=PRO1 PE=1 SV=1	1	17.419	17.5046	17.4588	17.5124	17.2445	17.26	17.2806	17.3192	17.4236	17.3416	17.3081	17.3904	17.7279	17.6488	17.532	17.7642	17.4711	17.709	17.5732	17.6896	17.6941	17.644	17.7273	18.1892	18.0114	17.9898	18.2079	17.7882	17.9766	17.7569	17.7442	7	67.2	14.266	131	0	54.852	16.7406	16.8192	16.755	16.8015	16.5239	16.5743	16.5986
Q93ZG7	Q93ZG7	DEAD-box ATP-dependent RNA helicase 38	RH38	sp|Q93ZG7|RH38_ARATH DEAD-box ATP-dependent RNA helicase 38 OS=Arabidopsis thaliana GN=RH38 PE=1 SV=2	1	19.5978	19.7275	19.7367	19.8438	19.7625	19.8558	19.6883	19.7828	19.8376	19.7173	19.7074	19.7004	19.9235	19.87	19.8035	19.8594	19.7678	19.7471	19.8647	19.9862	19.9613	20.0318	20.1052	19.8007	19.6956	19.7323	19.6243	19.7105	19.895	19.8835	19.8816	27	67.1	55.383	496	0	323.31	19.8647	19.9873	19.9781	20.0781	19.9872	20.1153	19.9516
P47998;Q9LJA0	P47998	Cysteine synthase 1	OASA1	sp|P47998|CYSK1_ARATH Cysteine synthase 1 OS=Arabidopsis thaliana GN=OASA1 PE=1 SV=2	2	19.4155	19.3668	19.2251	19.2697	19.3894	19.4435	19.4052	19.3614	19.2385	19.0809	19.0504	19.1339	19.3791	19.2627	19.2311	19.354	19.3154	19.1363	19.0636	19.2868	19.3231	19.3098	19.3587	19.3169	19.222	19.1712	19.2125	19.3077	19.4817	19.101	19.2553	19	67.1	33.805	322	0	323.31	19.0309	18.9752	18.8151	18.8525	18.9625	19.0514	19.017
P34788	P34788	40S ribosomal protein S18	RPS18A	sp|P34788|RS18_ARATH 40S ribosomal protein S18 OS=Arabidopsis thaliana GN=RPS18A PE=1 SV=1	1	21.0561	20.9948	21.0125	20.9694	20.886	20.8088	20.8967	20.9313	20.8217	20.8093	20.8909	20.8593	20.8713	20.8858	20.8732	20.7947	20.7602	20.8103	20.836	20.8475	20.7536	20.7222	20.7347	20.7848	20.8188	20.7852	20.8382	20.6225	20.6008	20.6513	20.5083	13	67.1	17.545	152	0	247.11	21.068	20.9996	20.9989	20.9486	20.8557	20.8132	20.905
Q9CAX7	Q9CAX7		F24K9.17	tr|Q9CAX7|Q9CAX7_ARATH Putative small nuclear ribonucleoprotein polypeptide G OS=Arabidopsis thaliana GN=F24K9.17 PE=2 SV=1	1	12.826	12.6993	12.8904	12.8782	12.9158	12.9551	12.9188	12.8857	12.579	12.7411	12.8356	12.6545	12.7334	12.769	12.9864	13.024	12.6327	12.8709	12.8815	12.9797	13.0827	12.7896	12.9984	12.653	12.67	12.6693	12.8071	12.739	12.9341	13.0795	12.9569	4	67.1	8.751	79	0	17.332	12.8628	12.729	12.9018	12.8823	12.9104	12.9844	12.952
O04630;Q8GZ45	O04630	Threonine--tRNA ligase, mitochondrial	THRRS	sp|O04630|SYTM1_ARATH Threonine--tRNA ligase, mitochondrial 1 OS=Arabidopsis thaliana GN=THRRS PE=2 SV=3	2	20.5435	20.532	20.6328	20.5943	20.6005	20.5914	20.561	20.5752	20.5667	20.1985	20.328	20.1921	20.6854	20.5331	20.5591	20.5933	20.4089	20.4825	20.6194	20.6658	20.5494	20.7075	20.7827	20.1355	20.1269	20.07	20.1625	20.5203	20.7709	20.5908	20.8014	48	67	80.935	709	0	323.31	20.4711	20.4526	20.535	20.4893	20.486	20.5116	20.4851
O04153	O04153	Calreticulin-3	CRT3	sp|O04153|CALR3_ARATH Calreticulin-3 OS=Arabidopsis thaliana GN=CRT3 PE=1 SV=2	1	19.8053	19.7863	19.8337	19.7749	20.0151	19.9213	19.9826	19.8911	19.7835	19.9445	19.946	19.9461	19.6907	19.7923	19.8642	19.7341	19.6128	19.5897	19.5224	19.6254	19.6138	19.6328	19.6179	19.6375	19.6279	19.5953	19.6468	19.6613	19.5473	19.4928	19.5445	26	67	49.843	424	0	323.31	19.8362	19.8102	19.8392	19.7733	20.0039	19.9448	20.0099
Q8LCW9	Q8LCW9	60S acidic ribosomal protein P1-1	RPP1A	sp|Q8LCW9|RLA11_ARATH 60S acidic ribosomal protein P1-1 OS=Arabidopsis thaliana GN=RPP1A PE=2 SV=2	1	19.7194	19.6897	19.7836	19.7858	19.7308	19.6355	19.6397	19.702	19.7075	19.6627	19.7689	19.7536	19.592	19.685	19.8146	19.7764	19.6277	19.7345	19.7522	19.7077	19.5919	19.5982	19.5049	19.6319	19.6534	19.6521	19.6281	19.2567	19.3535	19.5396	19.3098	6	67	11.162	112	0	231.91	19.88	19.8433	19.9187	19.9138	19.8492	19.7886	19.7966
Q9ASR1	Q9ASR1		T6H22.13	sp|Q9ASR1|EF2_ARATH Elongation factor 2 OS=Arabidopsis thaliana GN=LOS1 PE=1 SV=1	1	23.2197	23.1745	23.1597	22.9763	23.1716	23.0976	23.1783	23.1507	23.0251	23.1843	23.2464	23.1576	22.9993	22.9996	23.0697	23.0331	22.9192	22.8251	22.8641	23.1785	23.0244	22.9174	23.0051	22.7195	22.7816	22.8983	22.6837	22.6595	22.6876	22.5746	22.7128	54	66.9	93.89	843	0	323.31	23.2608	23.2087	23.1755	22.9849	23.1706	23.1313	23.2159
Q9ZVF3	Q9ZVF3	MLP-like protein 328	MLP328	sp|Q9ZVF3|ML328_ARATH MLP-like protein 328 OS=Arabidopsis thaliana GN=MLP328 PE=2 SV=1	1	18.4235	18.4154	18.3568	18.3368	18.3263	18.2445	18.527	18.3565	18.0175	18.1714	18.2538	18.1222	18.2484	18.5972	18.2892	18.5301	17.8225	17.6041	17.5895	18.0184	18.1465	18.2226	18.1939	17.6874	17.6897	17.7608	18.1377	18.0687	18.2979	17.8954	18.0016	9	66.9	17.513	151	0	75.001	18.0354	18.0203	17.9432	17.9161	17.896	17.8489	18.1353
Q9SL15	Q9SL15	Glycine-rich protein 3	GRP3	sp|Q9SL15|GRP3_ARATH Glycine-rich protein 3 OS=Arabidopsis thaliana GN=GRP3 PE=1 SV=1	1	15.0336	14.2665	14.857	14.6771	14.6845	14.6108	14.7386	14.5428	14.4001	14.139	14.3833	14.1365	14.3889	14.2638	14.7974	14.507	14.4105	14.8324	14.7172	14.683	14.5839	14.4391	14.2748	14.7998	14.7548	14.797	14.706	14.4423	14.3906	14.2995	14.3408	5	66.9	14.289	145	0	150.15	14.8362	14.0621	14.6342	14.4471	14.445	14.4061	14.5377
Q9S7C0	Q9S7C0	Heat shock 70 kDa protein 14	HSP70-14	sp|Q9S7C0|HSP7O_ARATH Heat shock 70 kDa protein 14 OS=Arabidopsis thaliana GN=HSP70-14 PE=2 SV=1	1	20.341	20.316	20.1768	20.036	20.38	20.4302	20.4759	20.3203	19.9584	19.8635	19.8881	19.9768	20.1247	20.0764	20.1445	20.1459	20.1944	19.9676	19.8173	20.077	20.1176	20.0071	20.1026	19.9051	19.8888	19.9312	19.9084	20.1366	20.0682	19.9944	20.0458	47	66.7	91.749	831	0	323.31	20.5213	20.4893	20.3318	20.1837	20.5182	20.6031	20.6527
Q9MAB2	Q9MAB2		T12H1.3	tr|Q9MAB2|Q9MAB2_ARATH At3g05070 OS=Arabidopsis thaliana GN=T12H1.3 PE=1 SV=1	1	15.8637	15.8867	15.8774	15.9286	15.9245	15.9846	15.9625	15.9571	15.9843	16.1327	16.2498	16.3395	15.9291	15.771	15.9736	15.8639	15.8652	16.046	16.0989	15.8711	15.914	15.9113	15.9074	16.0353	16.0306	16.0307	16.0887	15.5068	15.6303	15.702	15.5306	9	66.7	16.396	144	0	34.061	15.8544	15.8703	15.8426	15.8866	15.873	15.9678	15.9496
Q9SD76	Q9SD76	Alpha-glucan phosphorylase 2, cytosolic	PHS2	sp|Q9SD76|PHS2_ARATH Alpha-glucan phosphorylase 2, cytosolic OS=Arabidopsis thaliana GN=PHS2 PE=1 SV=1	1	19.8042	19.8114	19.8044	19.8725	19.7369	19.8838	19.7714	19.8371	19.6789	19.2891	19.3085	19.2326	19.7982	19.7366	19.6895	19.7699	20.0009	19.9302	19.824	19.9166	20.0394	19.8681	19.9919	19.453	19.3991	19.4856	19.5921	20.0703	20.1165	20.1388	20.0927	46	66.6	95.158	841	0	323.31	19.9401	19.9402	19.9149	19.9758	19.8306	20.0122	19.9037
O04151	O04151	Calreticulin-1	CRT1	sp|O04151|CALR1_ARATH Calreticulin-1 OS=Arabidopsis thaliana GN=CRT1 PE=1 SV=1	1	19.0748	19.2148	19.0468	19.0661	19.2194	19.1849	19.1279	19.0819	19.655	19.9945	19.8404	19.8636	19.2656	19.2485	19.1217	19.2558	19.2942	19.3001	19.1921	19.0718	19.0393	19.0817	19.0107	19.5011	19.5536	19.6159	19.5004	19.0771	19.147	19.1541	19.1763	25	66.6	48.527	425	0	323.31	18.8265	18.9594	18.773	18.7852	18.9289	18.9291	18.876
Q9ZT91	Q9ZT91	Elongation factor Tu, mitochondrial	TUFA	sp|Q9ZT91|EFTM_ARATH Elongation factor Tu, mitochondrial OS=Arabidopsis thaliana GN=TUFA PE=1 SV=1	1	20.0361	20.1444	20.1081	20.2362	20.1362	20.109	20.0956	20.194	20.8188	20.8484	20.7361	20.8444	20.3296	20.2737	20.147	20.2062	20.2976	20.3399	20.4518	20.4208	20.4437	20.5373	20.5463	20.0079	20.0444	20.1333	19.9994	20.1228	20.3027	20.5592	20.3693	29	66.5	49.409	454	0	323.31	20.2242	20.3255	20.2708	20.3917	20.2822	20.2897	20.2801
Q9SA78	Q9SA78	Coatomer subunit epsilon-1		sp|Q9SA78|COPE1_ARATH Coatomer subunit epsilon-1 OS=Arabidopsis thaliana GN=At1g30630 PE=2 SV=1	1	18.5685	18.6184	18.6495	18.5921	18.6683	18.618	18.5529	18.6377	18.5137	18.4138	18.4317	18.339	18.5324	18.5066	18.5807	18.5712	18.5305	18.6725	18.6008	18.6926	18.6598	18.6746	18.6613	18.4319	18.4481	18.5487	18.4573	18.5557	18.4754	18.7543	18.663	14	66.4	32.602	292	0	323.31	18.4225	18.4654	18.4781	18.4135	18.4802	18.4647	18.4034
Q08112	Q08112	40S ribosomal protein S15-1	RPS15A	sp|Q08112|RS151_ARATH 40S ribosomal protein S15-1 OS=Arabidopsis thaliana GN=RPS15A PE=2 SV=1	1	20.731	20.6569	20.6586	20.614	20.5925	20.4881	20.5753	20.6491	20.3983	20.4849	20.5941	20.56	20.5244	20.5908	20.6598	20.5553	20.2398	20.2986	20.4057	20.4595	20.3416	20.2809	20.328	20.5201	20.4951	20.4523	20.4605	20.1288	20.0794	20.1075	19.9064	13	66.4	17.129	152	0	309.72	20.5788	20.4978	20.481	20.4292	20.3982	20.3285	20.4196
Q9FY64;Q9FIX6;Q9FY65;Q9LD48;Q9FY66	Q9FY64	40S ribosomal protein S15-4	RPS15D	sp|Q9FY64|RS154_ARATH 40S ribosomal protein S15-4 OS=Arabidopsis thaliana GN=RPS15D PE=2 SV=1	5	18.2436	18.1356	18.246	18.1478	18.0671	17.9709	18.0927	18.1277	18.0269	18.172	18.2472	18.1634	18.0077	18.075	18.1874	18.1942	17.7255	17.8072	17.9409	17.9843	17.8681	17.8287	17.8907	18.0372	17.9824	17.9509	17.9644	17.6751	17.6458	17.6052	17.3466	11	66.4	17.072	152	0	18.969	17.9108	17.7958	17.8877	17.7824	17.6921	17.6307	17.7564
Q93VB0	Q93VB0		At2g40660	tr|Q93VB0|Q93VB0_ARATH Nucleic acid-binding, OB-fold-like protein OS=Arabidopsis thaliana GN=At2g40660 PE=2 SV=1	1	19.4701	19.417	19.4322	19.5576	19.6131	19.7613	19.5813	19.5559	19.945	20.0489	19.9462	19.9273	19.6641	19.5566	19.4995	19.605	19.4222	19.5948	19.7867	19.7415	19.6114	19.8989	19.9548	19.6996	19.6923	19.614	19.6765	19.5087	19.9076	19.8202	19.7255	30	66.3	42.088	389	0	201.67	19.2672	19.2071	19.204	19.3222	19.3681	19.5511	19.3748
Q93Z83	Q93Z83		At5g26280	tr|Q93Z83|Q93Z83_ARATH AT5g26280/T19G15_130 OS=Arabidopsis thaliana GN=At5g26280 PE=2 SV=1	1	20	19.9403	19.8006	19.6774	20.0682	20.0794	20.0457	19.8564	19.645	19.731	19.5736	19.442	19.8539	19.6302	19.6054	19.8131	20.006	19.9413	19.859	19.4798	19.5335	19.5968	19.6406	19.571	19.6704	19.6483	19.5906	20.0392	19.7363	19.5451	19.8799	20	66.3	39.445	350	0	323.31	19.709	19.6422	19.4841	19.3538	19.735	19.7809	19.7511
O24633	O24633	Proteasome subunit beta type-2-B	PBD2	sp|O24633|PSB2B_ARATH Proteasome subunit beta type-2-B OS=Arabidopsis thaliana GN=PBD2 PE=1 SV=1	1	19.2444	19.2077	19.0732	18.8409	19.2786	19.265	19.5028	19.2034	18.8241	18.7655	18.793	18.8356	18.9867	18.8587	18.9028	19.0301	18.8054	18.8268	18.7122	19.0338	18.9266	18.9946	19.0048	19.0774	19.1082	19.1203	19.0061	18.8877	18.803	18.7693	18.8574	13	66.3	21.984	199	0	249.29	19.6001	19.5563	19.4035	19.1639	19.5921	19.6132	19.8549
Q8LGG8	Q8LGG8	Universal stress protein A-like protein		sp|Q8LGG8|USPAL_ARATH Universal stress protein A-like protein OS=Arabidopsis thaliana GN=At3g01520 PE=1 SV=2	1	17.9535	18.1565	18.0698	18.1406	17.9532	17.9059	17.8988	17.8693	18.0761	18.1696	18.1028	18.1559	18.1866	18.1293	18.0013	18.0509	18.041	17.8442	17.8433	17.7412	17.9359	17.8487	17.8258	18.3663	18.3577	18.2649	18.3324	18.1601	18.05	17.8263	18.1207	13	66.3	19.568	175	0	60.972	18.0678	18.2638	18.1586	18.2223	18.0253	18.0127	18.0095
Q9S7H1	Q9S7H1	Photosystem I reaction center subunit II-1, chloroplastic	psaD1	sp|Q9S7H1|PSAD1_ARATH Photosystem I reaction center subunit II-1, chloroplastic OS=Arabidopsis thaliana GN=psaD1 PE=1 SV=1	1	18.909	19.0944	19.0225	19.1717	19.0883	18.9662	18.9168	18.8854	20.0539	20.2904	20.063	20.0389	19.39	19.5063	19.3494	19.2571	19.8656	19.6768	19.6691	19.1052	19.4395	19.414	19.2522	20.0985	20.0466	19.4862	19.7427	20.0115	19.734	19.6726	19.8562	13	66.3	22.598	208	0	323.31	19.1463	19.3246	19.2343	19.3764	19.2834	19.196	19.1505
Q6NMZ4	Q6NMZ4		At4g34412	tr|Q6NMZ4|Q6NMZ4_ARATH At4g34412 OS=Arabidopsis thaliana GN=At4g34412 PE=2 SV=1	1	17.3984	17.3523	17.4755	17.4356	17.3875	17.3157	17.4254	17.427	17.3611	17.2155	17.3198	17.2515	17.2674	17.3063	17.3836	17.4521	17.2356	17.2425	17.2932	17.3956	17.2894	17.3497	17.3707	17.077	17.1037	17.0862	17.1251	17.2793	17.443	17.3088	17.3534	10	66.3	18.826	172	0	228.29	17.4409	17.3878	17.4926	17.4454	17.3878	17.3508	17.4643
Q8LBN7;F4JZP8	Q8LBN7	Costars family protein At4g33640		sp|Q8LBN7|COSA_ARATH Costars family protein At4g33640 OS=Arabidopsis thaliana GN=At4g33640 PE=1 SV=1	2	17.2293	16.9565	16.8122	16.6055	16.9042	17.0704	17.2626	16.9449	16.3988	16.2223	16.3006	16.3476	16.768	16.6782	16.7092	16.6447	16.7804	16.4273	16.3904	16.4736	16.5999	16.3633	16.4631	16.4167	16.2106	16.3674	16.4994	17.148	16.9262	16.4685	16.7319	6	66.3	10.42	95	0	50.44	17.2147	16.9348	16.7721	16.5582	16.8473	17.0484	17.2443
Q8GW48	Q8GW48		HSBP	tr|Q8GW48|Q8GW48_ARATH At4g15810 OS=Arabidopsis thaliana GN=HSBP PE=2 SV=1	1	16.4639	16.2979	16.4135	16.4904	16.3261	16.2819	16.333	16.3744	16.4723	16.5514	16.5236	16.5757	16.4273	16.54	16.4905	16.594	16.4512	16.6046	16.5153	16.5444	16.5536	16.6964	16.602	16.6637	16.7748	16.796	16.7757	16.2344	16.3798	16.4618	16.3513	4	66.3	9.3472	86	0	55.775	16.6284	16.4554	16.5526	16.6223	16.4484	16.439	16.4939
Q8S9L5	Q8S9L5	Trigger factor-like protein TIG, Chloroplastic	TIG	sp|Q8S9L5|TIG_ARATH Trigger factor-like protein TIG, Chloroplastic OS=Arabidopsis thaliana GN=TIG PE=1 SV=1	1	20.2982	20.26	20.3004	20.2773	20.1722	20.2258	20.1442	20.2764	20.1567	19.9828	19.9709	20.0818	20.2773	20.3406	20.2974	20.266	20.8049	20.5833	20.6021	20.1214	20.2288	20.1195	20.021	19.9635	19.8602	19.8846	19.9308	20.403	20.3118	20.2435	20.2939	37	66.2	61.733	547	0	323.31	20.4277	20.3825	20.4045	20.3742	20.2595	20.3479	20.2701
Q9C6B3	Q9C6B3	Gamma carbonic anhydrase 2, mitochondrial	GAMMACA2	sp|Q9C6B3|GCA2_ARATH Gamma carbonic anhydrase 2, mitochondrial OS=Arabidopsis thaliana GN=GAMMACA2 PE=1 SV=1	1	18.9481	19.2082	19.1542	19.3729	19.1224	19.1469	19.0593	19.1939	19.491	19.6667	19.5899	19.7346	19.3663	19.4883	19.2903	19.3458	19.3822	19.1985	19.4155	19.3217	19.5763	19.4913	19.2909	20.2327	20.2365	19.8857	20.024	19.4202	19.3555	19.401	19.3494	17	66.2	30.065	278	0	323.31	19.3366	19.5897	19.5173	19.7287	19.4688	19.528	19.4442
Q8LPJ7	Q8LPJ7	40S ribosomal protein S26-2	RPS26B	sp|Q8LPJ7|RS262_ARATH 40S ribosomal protein S26-2 OS=Arabidopsis thaliana GN=RPS26B PE=2 SV=2	1	19.7287	19.7047	19.6614	19.591	19.669	19.5684	19.6794	19.5992	19.5578	19.5618	19.6749	19.6979	19.5263	19.5246	19.5841	19.5239	19.3175	19.3521	19.3954	19.4234	19.2774	19.2468	19.2668	19.4011	19.3712	19.3622	19.3106	19.143	19.1158	19.0222	18.8912	16	66.2	14.841	133	0	323.31	19.3205	19.2895	19.2277	19.1502	19.2186	19.1528	19.2676
Q9SA56	Q9SA56	Photosystem I reaction center subunit II-2, chloroplastic	PSAD2	sp|Q9SA56|PSAD2_ARATH Photosystem I reaction center subunit II-2, chloroplastic OS=Arabidopsis thaliana GN=PSAD2 PE=1 SV=1	1	13.3889	13.4706	13.4865	13.5266	13.3383	13.2355	13.0515	12.9434	14.7273	14.9949	14.7282	14.7612	13.8306	13.9944	13.7607	13.5806	14.1924	13.9803	13.9838	13.0876	13.6355	13.6206	13.4309	14.4877	14.3748	13.6866	14.2754	14.3298	14.0056	13.8823	14.2363	13	66.2	22.306	204	0	17.89	14.8641	14.9388	14.9363	14.9692	14.7713	14.7033	14.5231
Q93VR3	Q93VR3	GDP-mannose 3,5-epimerase		sp|Q93VR3|GME_ARATH GDP-mannose 3,5-epimerase OS=Arabidopsis thaliana GN=At5g28840 PE=1 SV=1	1	19.5509	19.4761	19.4206	19.4381	19.7563	19.9076	19.7201	19.839	18.8588	18.6646	18.6926	18.689	19.6267	19.5412	19.3687	19.4845	19.1266	18.9938	18.884	19.9022	20.0671	19.8485	19.993	19.1337	19.0589	19.1068	19.0935	20.181	20.1699	19.9826	20.3252	25	66	42.758	377	0	304.06	19.7273	19.6455	19.5716	19.5819	19.8906	20.0767	19.893
P53492	P53492	Actin-7	ACT7	sp|P53492|ACT7_ARATH Actin-7 OS=Arabidopsis thaliana GN=ACT7 PE=1 SV=1	1	19.8691	20.1205	19.9891	20.1872	20.0541	20.0548	20.0128	20.1155	19.8574	19.629	19.7236	19.6439	20.294	20.2336	20.0553	20.1709	20.0603	19.9369	19.9115	20.2707	20.2782	20.3606	20.4396	19.8403	19.7299	19.8033	19.8809	20.1323	20.4328	20.2749	20.3706	24	66	41.735	377	0	323.31	19.8078	20.0522	19.9023	20.0933	19.9506	19.9861	19.9479
F4HR88;F4HR92;O48705	F4HR88		At1g33590	tr|F4HR88|F4HR88_ARATH Leucine-rich repeat (LRR) family protein OS=Arabidopsis thaliana GN=At1g33590 PE=4 SV=1	3	19.8456	19.6783	19.8063	20.0008	20.1978	19.8734	19.897	19.8948	20.4653	20.9082	20.8592	20.7603	19.6036	19.8227	19.8221	19.7866	19.4542	19.829	20.0226	20.0384	19.9835	20.2428	20.1633	19.823	19.78	19.7744	19.9603	19.8386	20.1519	20.1504	20.0298	23	66	51.741	477	0	323.31	20.0246	19.8503	19.9599	20.1472	20.3346	20.045	20.0725
P53496	P53496	Actin-11	ACT11	sp|P53496|ACT11_ARATH Actin-11 OS=Arabidopsis thaliana GN=ACT11 PE=1 SV=1	1	17.0064	17.1636	17.0901	17.2384	17.0459	17.0161	17.0023	17.1483	16.7518	16.4852	16.5509	16.5316	17.2788	17.2594	17.0639	17.2036	17.0259	16.876	16.845	17.3148	17.3006	17.4118	17.468	16.8427	16.7476	16.7676	16.8288	17.1914	17.3554	17.3064	17.4271	23	66	41.674	377	0	186.78	17.0058	17.156	17.0641	17.2052	17.0032	17.0081	16.9982
O49499	O49499	Caffeoyl-CoA O-methyltransferase 1	CCOAOMT1	sp|O49499|CAMT4_ARATH Caffeoyl-CoA O-methyltransferase 1 OS=Arabidopsis thaliana GN=CCOAOMT1 PE=1 SV=1	1	18.3854	18.2104	18.1087	17.86	18.4972	18.5125	18.721	18.2858	18.1329	18.1472	18.0978	17.9809	18.0339	17.9149	17.9907	18.0906	18.1456	18.1107	17.8651	18.0349	18.0803	17.9342	18.0377	17.8477	17.9301	17.9186	17.7789	18.1837	18.0237	17.996	17.9403	14	66	29.155	259	0	177.22	19.0567	18.8746	18.7545	18.4986	19.1263	19.1763	19.3887
Q9LD55	Q9LD55	Eukaryotic translation initiation factor 3 subunit A	TIF3A1	sp|Q9LD55|EIF3A_ARATH Eukaryotic translation initiation factor 3 subunit A OS=Arabidopsis thaliana GN=TIF3A1 PE=1 SV=1	1	21.161	21.1124	21.1185	21.0123	21.2339	21.2614	21.2488	21.242	21.1857	21.2242	21.3099	21.2287	20.9764	20.9706	21.0701	21.0271	20.9644	21.0623	21.1626	21.153	20.9823	21.0613	21.0557	21.0684	21.1384	21.2258	21.0454	20.68	20.7677	20.8496	20.7384	69	65.8	114.3	987	0	323.31	21.1874	21.1318	21.1195	21.0061	21.2181	21.2804	21.2717
Q9LZF6	Q9LZF6	Cell division control protein 48 homolog E	CDC48E	sp|Q9LZF6|CD48E_ARATH Cell division control protein 48 homolog E OS=Arabidopsis thaliana GN=CDC48E PE=1 SV=2	1	15.8377	15.9309	15.7753	15.8909	16.1249	16.1638	16.1632	16.1392	15.4871	15.2867	15.3958	15.4625	15.8523	15.7967	15.7629	15.9139	15.8225	15.825	15.6364	15.907	15.9009	15.9647	16.0179	15.6895	15.6431	15.8195	15.7283	15.8065	15.9387	15.8845	15.9042	45	65.8	89.957	810	0	96.652	15.8535	15.9397	15.7657	15.8741	16.0986	16.1722	16.1754
O65902	O65902	Cyclase-associated protein 1	CAP1	sp|O65902|ACAP1_ARATH Cyclase-associated protein 1 OS=Arabidopsis thaliana GN=CAP1 PE=2 SV=1	1	19.677	19.6899	19.5954	19.4725	19.5825	19.6303	19.7449	19.6611	19.2595	19.0503	19.1439	19.2174	19.5469	19.5188	19.5403	19.5235	19.5511	19.3892	19.3461	19.474	19.5323	19.4381	19.4944	19.3532	19.3215	19.3272	19.3497	19.7594	19.643	19.5506	19.6905	32	65.8	50.969	476	0	209.89	19.6819	19.6878	19.575	19.4448	19.5452	19.6279	19.7463
Q9SVW7	Q9SVW7		MRPL11	tr|Q9SVW7|Q9SVW7_ARATH At4g35490 OS=Arabidopsis thaliana GN=MRPL11 PE=2 SV=1	1	17.0131	17.0489	17.098	17.0615	17.1475	17.1179	17.1316	17.0717	17.354	17.6471	17.6513	17.7085	17.0906	17.1871	17.2327	17.1107	17.1568	17.0738	17.1239	17.1655	17.2709	17.214	17.2224	17.0947	17.1304	17.0706	17.1166	17.1698	17.0312	17.0171	17.0801	9	65.8	16.888	155	0	76.584	16.9905	17.0192	17.05	17.0062	17.0828	17.0878	17.1054
Q9C9C6;Q9C9C5	Q9C9C6;Q9C9C5	60S ribosomal protein L6-2;60S ribosomal protein L6-3	RPL6B;RPL6C	sp|Q9C9C6|RL62_ARATH 60S ribosomal protein L6-2 OS=Arabidopsis thaliana GN=RPL6B PE=2 SV=1;sp|Q9C9C5|RL63_ARATH 60S ribosomal protein L6-3 OS=Arabidopsis thaliana GN=RPL6C PE=2 SV=1	2	22.0319	21.9912	21.9801	21.9845	21.8831	21.848	21.8832	21.9756	21.8247	21.7916	21.9148	21.8683	21.8972	21.9234	21.9368	21.8842	21.7309	21.794	21.9036	21.7679	21.7352	21.6623	21.7464	21.7195	21.777	21.7369	21.8491	21.5739	21.668	21.6892	21.5131	25	65.7	26.008	233	0	208.82	22.1605	22.1128	22.0832	22.0804	21.9695	21.9691	22.0082
Q9FZ76	Q9FZ76	60S ribosomal protein L6-1	RPL6A	sp|Q9FZ76|RL61_ARATH 60S ribosomal protein L6-1 OS=Arabidopsis thaliana GN=RPL6A PE=2 SV=1	1	19.5079	19.4492	19.4673	19.4062	19.3927	19.3463	19.424	19.4659	19.336	19.2951	19.3291	19.2869	19.3295	19.3613	19.4171	19.3182	19.1648	19.2434	19.2482	19.3141	19.2013	19.17	19.1967	19.1551	19.154	19.2005	19.1911	19.0091	19.0384	19.1865	18.9312	23	65.7	26.152	233	0	52.312	19.6586	19.5929	19.5925	19.5243	19.5012	19.4895	19.5711
Q9LYG2	Q9LYG2		T22P22_70	tr|Q9LYG2|Q9LYG2_ARATH Putative uncharacterized protein At5g11680 OS=Arabidopsis thaliana GN=T22P22_70 PE=2 SV=1	1	17.0058	17.0833	17.0435	17.0796	17.0272	16.9969	17.0223	17.029	17.2075	17.2599	17.1465	17.2461	17.0884	17.1328	17.0737	17.1042	17.1041	17.05	17.0791	16.8383	16.958	17.0129	16.933	17.3473	17.3923	17.3904	17.3691	16.9341	16.7706	16.8673	16.9312	10	65.7	23.106	207	0	100.08	17.0825	17.153	17.0949	17.1237	17.0618	17.0662	17.0955
Q38858	Q38858	Calreticulin-2	CRT2	sp|Q38858|CALR2_ARATH Calreticulin-2 OS=Arabidopsis thaliana GN=CRT2 PE=1 SV=3	1	19.2518	19.3913	19.172	19.1694	19.386	19.3834	19.2952	19.2446	19.7644	20.0434	19.9034	19.9281	19.404	19.3604	19.2986	19.3827	19.5192	19.5212	19.2924	19.2601	19.262	19.212	19.1588	19.894	19.9246	19.9972	19.8198	19.417	19.3262	19.3602	19.3516	27	65.6	48.156	424	0	299.27	19.2101	19.3426	19.1049	19.0951	19.3022	19.3342	19.25
P47999	P47999	Cysteine synthase, chloroplastic/chromoplastic	OASB	sp|P47999|CYSKP_ARATH Cysteine synthase, chloroplastic/chromoplastic OS=Arabidopsis thaliana GN=OASB PE=1 SV=2	1	19.3466	19.2389	19.1915	19.1911	19.3196	19.4682	19.4232	19.2578	19.3434	19.0399	19.0234	19.0965	19.3457	19.1863	19.1217	19.2424	19.4328	19.2333	19.1782	19.1478	19.2577	19.2045	19.2818	19.0574	18.9992	18.9732	18.9886	19.466	19.5955	19.2456	19.4204	23	65.6	41.656	392	0	323.31	19.303	19.1884	19.1226	19.115	19.2339	19.4173	19.3762
Q9SYT0	Q9SYT0	Annexin D1	ANN1	sp|Q9SYT0|ANXD1_ARATH Annexin D1 OS=Arabidopsis thaliana GN=ANN1 PE=1 SV=1	1	20.0689	20.3128	20.1681	19.9522	20.005	19.8604	19.6901	19.7266	19.4659	19.7017	19.435	19.339	20.3958	20.4855	20.4966	20.3343	19.9266	19.9798	19.7435	20.109	20.2303	19.8563	19.8857	20.5761	20.5754	20.23	20.3111	20.2827	19.9314	19.9433	20.0035	22	65.6	36.203	317	0	295.24	20.4023	20.6391	20.4761	20.2529	20.2961	20.1863	20.0198
P42734	P42734	Probable cinnamyl alcohol dehydrogenase 9	CAD9	sp|P42734|CADH9_ARATH Probable cinnamyl alcohol dehydrogenase 9 OS=Arabidopsis thaliana GN=CAD9 PE=2 SV=2	1	19.4889	19.3759	19.3517	19.1863	19.1582	19.4429	19.5345	19.4632	18.8059	18.1052	18.2088	18.202	19.4269	19.1654	19.1224	19.2999	19.2965	19.1325	19.0491	19.4852	19.6502	19.5667	19.7905	18.7507	18.6409	18.6829	18.829	19.6741	19.7344	19.4483	19.6643	19	65.6	38.933	360	0	323.31	19.5464	19.4263	19.3837	19.2112	19.1735	19.4929	19.5884
P49206	P49206	40S ribosomal protein S26-1	RPS26A	sp|P49206|RS261_ARATH 40S ribosomal protein S26-1 OS=Arabidopsis thaliana GN=RPS26A PE=2 SV=2	1	18.2457	18.1796	18.2355	18.1957	18.1481	18.0214	18.1728	18.0689	18.1315	18.164	18.2577	18.1872	18.0314	18.1602	18.1685	18.1589	17.87	17.9608	18.0361	17.9689	17.9283	17.7553	17.8474	18.0917	17.991	17.9163	17.9836	17.4939	17.6284	17.6437	17.4367	15	65.6	14.729	131	0	223.45	18.2439	18.1708	18.2083	18.1613	18.1041	18.0121	18.1674
Q9LR30	Q9LR30	Glutamate--glyoxylate aminotransferase 1	GGAT1	sp|Q9LR30|GGT1_ARATH Glutamate--glyoxylate aminotransferase 1 OS=Arabidopsis thaliana GN=GGAT1 PE=1 SV=1	1	19.4878	19.4123	19.4195	19.4169	19.4571	19.6697	19.5325	19.5372	19.6615	19.511	19.4854	19.5644	19.4952	19.4736	19.8341	19.4831	19.5592	19.508	19.4657	19.6391	19.7412	19.4845	19.5803	19.3374	19.15	19.214	19.2926	19.9569	19.8732	19.9618	19.8886	25	65.5	53.301	481	0	323.31	19.3512	19.2687	19.2575	19.2477	19.2783	19.5257	19.3924
P46286	P46286	60S ribosomal protein L8-1	RPL8A	sp|P46286|RL81_ARATH 60S ribosomal protein L8-1 OS=Arabidopsis thaliana GN=RPL8A PE=1 SV=2	1	20.8473	20.8257	20.8333	20.8435	20.751	20.7042	20.7669	20.794	20.7083	20.6731	20.8251	20.7772	20.745	20.782	20.8372	20.7565	20.6477	20.6698	20.6989	20.7114	20.6073	20.6065	20.5833	20.604	20.585	20.6114	20.6211	20.5014	20.4855	20.5229	20.3665	21	65.5	27.859	258	0	298.95	20.8626	20.834	20.8232	20.8262	20.7241	20.712	20.7787
Q8L5U0	Q8L5U0	COP9 signalosome complex subunit 4	CSN4	sp|Q8L5U0|CSN4_ARATH COP9 signalosome complex subunit 4 OS=Arabidopsis thaliana GN=CSN4 PE=1 SV=2	1	18.7363	18.8866	18.7688	18.7566	18.7146	18.7937	18.7057	18.7104	18.5793	18.3188	18.3083	18.3174	18.7982	18.7936	18.7069	18.8072	18.8923	18.7419	18.6265	18.6836	18.8477	18.7379	18.788	18.3927	18.3323	18.377	18.3883	18.8924	18.8751	18.8335	18.8582	20	65.5	44.957	397	0	323.31	18.9257	19.0689	18.9328	18.9133	18.8617	18.9756	18.8915
O04202	O04202	Eukaryotic translation initiation factor 3 subunit F	TIF3F1	sp|O04202|EIF3F_ARATH Eukaryotic translation initiation factor 3 subunit F OS=Arabidopsis thaliana GN=TIF3F1 PE=1 SV=1	1	17.8738	17.8675	17.9744	17.8472	18.0144	18.0279	17.9652	18.0103	17.8644	17.8982	18.0064	17.8204	17.8019	17.8347	17.9161	17.953	17.8349	17.9384	17.9544	18.0198	17.8675	17.9308	17.99	17.7932	17.903	18.0101	17.9195	17.7411	17.7979	17.8157	17.8308	14	65.5	31.862	293	0	207.15	17.7416	17.7283	17.8168	17.6824	17.8401	17.8883	17.8294
Q9LQ55	Q9LQ55	Dynamin-2B	DRP2B	sp|Q9LQ55|DRP2B_ARATH Dynamin-2B OS=Arabidopsis thaliana GN=DRP2B PE=1 SV=2	1	20.4783	20.4386	20.4695	20.3944	20.5318	20.569	20.5344	20.4681	20.5819	20.6537	20.662	20.6459	20.4002	20.3836	20.4506	20.3556	20.4305	20.5039	20.5055	20.3496	20.3115	20.335	20.3027	20.5153	20.5755	20.6842	20.5513	20.2367	20.2866	20.337	20.2847	55	65.4	100.23	920	0	323.31	20.614	20.5673	20.5798	20.4975	20.6253	20.6973	20.6666
Q9SVN5	Q9SVN5	Probable methionine--tRNA ligase		sp|Q9SVN5|SYMC_ARATH Methionine--tRNA ligase, cytoplasmic OS=Arabidopsis thaliana GN=At4g13780 PE=2 SV=1	1	19.8565	19.8777	19.858	19.9416	19.8311	19.8684	19.7055	19.9099	19.5426	19.1831	19.2352	19.1859	19.885	19.8613	19.7952	19.826	19.883	19.854	19.7556	20.0548	20.0984	20.0084	20.107	19.3321	19.2756	19.3149	19.4145	20.2383	20.3037	20.3532	20.3312	45	65.4	89.853	797	0	323.31	19.7518	19.7659	19.7279	19.8043	19.6842	19.7562	19.5972
Q9FIB6	Q9FIB6	26S proteasome non-ATPase regulatory subunit 12 homolog A	RPN5A	sp|Q9FIB6|PS12A_ARATH 26S proteasome non-ATPase regulatory subunit 12 homolog A OS=Arabidopsis thaliana GN=RPN5A PE=1 SV=1	1	20.0587	20.0518	20.0226	19.9161	19.9489	19.9599	20.0566	19.945	19.6662	19.5241	19.6109	19.5197	19.7928	19.831	19.81	19.9172	19.7367	19.7843	19.7665	20.0328	19.9064	19.9123	20.0112	19.8267	19.8508	19.888	19.835	19.7758	19.771	19.8348	19.8409	27	65.4	50.837	442	0	323.31	19.7923	19.7784	19.7308	19.6171	19.6403	19.6861	19.7866
O22969	O22969	Uncharacterized protein At2g34160		sp|O22969|Y2416_ARATH Uncharacterized protein At2g34160 OS=Arabidopsis thaliana GN=At2g34160 PE=1 SV=1	1	19.205	19.1959	19.1167	19.1215	19.086	19.0253	19.0442	19.0697	19.1068	19.0207	19.0646	19.0169	19.0976	19.0812	19.0564	19.1054	19.0054	19.0419	19.0885	18.9187	18.864	18.9422	18.9297	18.9537	18.9271	19.0294	18.958	18.8594	18.9343	18.862	18.9103	10	65.4	14.617	130	0	111.48	19.1557	19.1396	19.042	19.0396	18.9945	18.9686	18.9914
Q9LP53;Q9SR12	Q9LP53		F28N24.7	tr|Q9LP53|Q9LP53_ARATH Alba DNA/RNA-binding protein OS=Arabidopsis thaliana GN=F28N24.7 PE=1 SV=1	2	15.3124	15.2998	15.224	15.2284	15.239	15.151	15.1225	15.1361	15.2297	15.1188	15.0953	14.9259	15.1772	15.2279	15.1399	15.1076	15.1071	14.9799	15.0418	15.1664	15.109	15.0547	15.05	14.701	14.6003	14.6285	14.5797	15.1651	15.1762	15.0581	15.1452	10	65.4	14.574	130	0	34.041	15.4319	15.4123	15.318	15.3153	15.3164	15.2631	15.2384
Q9LEY9	Q9LEY9	H/ACA ribonucleoprotein complex subunit 2-like protein		sp|Q9LEY9|NHP2_ARATH H/ACA ribonucleoprotein complex subunit 2-like protein OS=Arabidopsis thaliana GN=At5g08180 PE=1 SV=1	1	17.118	16.9617	17.0655	16.959	17.1172	17.1544	17.1397	17.0287	17.3602	17.4808	17.5028	17.6487	16.9601	16.9677	17.126	17.0231	17.1817	17.3248	17.2333	17.0572	17.0674	16.9677	16.8904	16.9433	16.9679	16.9089	16.8949	17.0549	17.2603	17.104	17.2313	8	65.4	16.948	156	0	59.358	16.2647	16.1014	16.1868	16.0731	16.2217	16.2937	16.2828
P41376	P41376	Eukaryotic initiation factor 4A-1	TIF4A-1	sp|P41376|IF4A1_ARATH Eukaryotic initiation factor 4A-1 OS=Arabidopsis thaliana GN=TIF4A-1 PE=1 SV=1	1	17.9551	17.9973	17.9492	17.9806	17.8872	17.8944	17.8584	17.9428	17.8923	17.8066	17.8263	17.9396	17.8858	17.9074	17.8854	17.8945	17.9305	17.9212	17.8844	17.9339	17.8926	17.9275	17.9172	17.771	17.7476	17.9175	17.8073	17.7375	17.778	17.8715	17.776	27	65.3	46.704	412	0	56.96	18.0941	18.1292	18.0628	18.087	17.984	18.0259	17.9938
O82089	O82089	Copper transport protein CCH	CCH	sp|O82089|CCH_ARATH Copper transport protein CCH OS=Arabidopsis thaliana GN=CCH PE=1 SV=1	1	18.2245	18.1556	17.9429	17.8641	18.2418	18.2962	18.4393	18.1811	18.0324	17.9595	17.9991	18.1298	18.2353	18.1171	18.0536	18.1308	17.9677	17.8689	17.7242	17.8869	18.0344	17.8543	17.929	17.9844	17.895	17.8617	17.9561	18.1428	17.96	17.8936	17.9903	8	65.3	12.971	121	0	123.94	18.1705	18.0947	17.8635	17.7776	18.1457	18.2348	18.3817
Q9STE8	Q9STE8	Protein TOC75-3, chloroplastic	TOC75-3	sp|Q9STE8|TC753_ARATH Protein TOC75-3, chloroplastic OS=Arabidopsis thaliana GN=TOC75-3 PE=1 SV=1	1	19.4431	19.3525	19.4829	19.3239	19.4475	19.3855	19.2481	19.2835	19.5959	19.7261	19.5897	19.6814	19.4135	19.4615	19.514	19.364	19.5967	19.5965	19.6125	19.2585	19.4078	19.3694	19.1775	19.9051	19.9421	19.8131	19.7937	19.486	19.2845	19.4256	19.4376	40	65.2	89.188	818	0	323.31	19.5581	19.4605	19.5725	19.4063	19.5204	19.4931	19.3596
Q9SKR2;F4IFM9;F4IGX9;B6ETT4;Q7XA06	Q9SKR2	Synaptotagmin-1	SYT1	sp|Q9SKR2|SYT1_ARATH Synaptotagmin-1 OS=Arabidopsis thaliana GN=SYT1 PE=1 SV=2	5	19.4025	19.4615	19.4673	19.4361	19.4147	19.4354	19.3805	19.3784	19.5638	19.6506	19.5787	19.6332	19.5536	19.558	19.5122	19.5005	19.6354	19.562	19.5329	19.3946	19.4929	19.4229	19.3614	19.8086	19.7969	19.7171	19.768	19.6334	19.5649	19.513	19.6295	34	65.2	61.743	541	0	323.31	19.5313	19.5833	19.5707	19.5323	19.5014	19.5568	19.5058
O23254	O23254	Serine hydroxymethyltransferase 4	SHM4	sp|O23254|GLYC4_ARATH Serine hydroxymethyltransferase 4 OS=Arabidopsis thaliana GN=SHM4 PE=1 SV=1	1	20.6524	20.5906	20.5891	20.6627	20.8293	20.8038	20.9402	20.8031	20.8876	20.903	21.0397	20.9833	20.6238	20.7138	20.6385	20.6538	20.5523	20.6422	20.902	21.0191	20.8583	21.0644	21.0659	20.6929	20.7908	20.7191	20.6185	20.9275	21.0544	21.1556	21.0336	23	65.2	51.717	471	0	323.31	20.4072	20.3384	20.3185	20.3849	20.542	20.5512	20.6915
Q9C901	Q9C901		F5E6.6	tr|Q9C901|Q9C901_ARATH DNA-binding enhancer-like protein OS=Arabidopsis thaliana GN=F5E6.6 PE=1 SV=1	1	17.1481	16.9772	17.0008	16.8748	17.1436	17.0695	17.3043	17.0532	17.5269	17.8242	17.8123	17.9143	16.8812	16.9647	17.1176	17.0572	16.604	16.8458	17.0597	16.9917	16.7174	17.2125	16.9455	17.6808	17.5472	17.597	17.4201	15.9653	16.2531	16.3827	16.2299	7	65.2	12.795	115	0	74.163	16.9634	16.7855	16.7907	16.6575	16.9167	16.8774	17.116
P56808	P56808	30S ribosomal protein S19, chloroplastic	rps19	sp|P56808|RR19_ARATH 30S ribosomal protein S19, chloroplastic OS=Arabidopsis thaliana GN=rps19 PE=3 SV=1	1	17.3951	16.8926	17.2721	17.2375	17.1057	17.01	16.9802	17.113	17.1685	16.6657	16.9468	16.8308	17.0188	17.0813	17.0933	16.9693	17.2941	17.3632	17.2755	17.3349	17.3405	17.3428	17.2365	17.1282	17.1059	17.1611	17.1691	17.2394	17.229	17.3212	17.2553	5	65.2	10.608	92	0	51.537	18.0707	17.5612	17.9222	17.8805	17.7392	17.6782	17.6522
P51413	P51413	60S ribosomal protein L17-2	RPL17B	sp|P51413|RL172_ARATH 60S ribosomal protein L17-2 OS=Arabidopsis thaliana GN=RPL17B PE=2 SV=2	1	21.4628	21.4289	21.4325	21.385	21.412	21.3472	21.421	21.4654	21.3395	21.3133	21.3456	21.3314	21.3096	21.3456	21.4279	21.3419	21.2008	21.2012	21.2412	21.2459	21.0974	21.1079	21.1153	21.1542	21.1628	21.14	21.1491	20.9911	20.957	20.9688	20.8398	14	65.1	19.854	175	0	207.98	21.2161	21.1751	21.1604	21.1057	21.1231	21.0931	21.1707
Q96266	Q96266	Glutathione S-transferase F8, chloroplastic	GSTF8	sp|Q96266|GSTF8_ARATH Glutathione S-transferase F8, chloroplastic OS=Arabidopsis thaliana GN=GSTF8 PE=1 SV=3	1	18.953	18.9886	18.8646	18.9032	19.4416	19.456	19.4228	19.4212	18.6684	18.3769	18.4182	18.3638	19.0237	18.7586	18.7434	18.8621	18.9829	18.7818	18.6715	18.9439	19.0462	18.8713	19.023	18.4598	18.4561	18.404	18.4871	18.982	19.0557	18.6936	18.9663	12	65	29.231	263	0	323.31	18.7621	18.7908	18.6484	18.6798	19.2086	19.2577	19.2284
P49688	P49688	40S ribosomal protein S2-3	RPS2C	sp|P49688|RS23_ARATH 40S ribosomal protein S2-3 OS=Arabidopsis thaliana GN=RPS2C PE=1 SV=2	1	21.698	21.6434	21.6378	21.6266	21.4882	21.4346	21.5492	21.5663	21.4571	21.4209	21.51	21.4815	21.4871	21.5473	21.5318	21.4861	21.3682	21.4007	21.4628	21.4758	21.3486	21.3232	21.3401	21.3786	21.3843	21.389	21.3929	21.2383	21.2075	21.2426	21.0547	24	64.9	30.878	285	0	319.88	21.8014	21.7397	21.7157	21.6973	21.5494	21.5305	21.649
Q9T043	Q9T043	60S ribosomal protein L14-2	RPL14B	sp|Q9T043|RL142_ARATH 60S ribosomal protein L14-2 OS=Arabidopsis thaliana GN=RPL14B PE=2 SV=1	1	21.4659	21.4237	21.414	21.3929	21.3536	21.279	21.3194	21.3844	21.2532	21.1987	21.2921	21.2472	21.283	21.3503	21.3623	21.3247	21.1976	21.2139	21.2337	21.2428	21.1476	21.1035	21.1115	21.1109	21.1222	21.0637	21.111	21.0074	20.971	21.0662	20.877	16	64.9	15.505	134	0	210.12	21.6642	21.615	21.5869	21.5586	21.5097	21.4699	21.5142
Q96300	Q96300	14-3-3-like protein GF14 nu	GRF7	sp|Q96300|14337_ARATH 14-3-3-like protein GF14 nu OS=Arabidopsis thaliana GN=GRF7 PE=1 SV=1	1	17.951	17.8922	17.7497	17.5908	17.8605	17.8857	17.9667	17.8114	17.5032	17.3427	17.3515	17.3242	17.8587	17.7864	17.7133	17.779	17.6743	17.4613	17.3571	17.5957	17.6878	17.5722	17.6507	17.5751	17.5935	17.5739	17.5854	17.7845	17.675	17.5073	17.6734	15	64.9	29.824	265	0	220.9	18.049	17.9832	17.8223	17.6562	17.9164	17.9763	18.0611
P93654;REV__O23463;REV__Q9LSP8	P93654	Syntaxin-22	SYP22	sp|P93654|SYP22_ARATH Syntaxin-22 OS=Arabidopsis thaliana GN=SYP22 PE=1 SV=1	3	17.5039	17.5776	17.5173	17.5798	17.489	17.5039	17.4587	17.4793	17.7005	17.8242	17.8206	17.8848	17.7378	17.7651	17.6268	17.6248	17.5176	17.5266	17.5324	17.3787	17.4639	17.5408	17.4465	18.2901	18.3135	18.2807	18.336	17.3351	17.4773	17.39	17.4029	13	64.9	29.481	268	0	241.73	17.2653	17.3319	17.2532	17.3086	17.2082	17.2578	17.2165
Q42342	Q42342	Cytochrome b5 isoform E	CYTB5-E	sp|Q42342|CYB5E_ARATH Cytochrome b5 isoform E OS=Arabidopsis thaliana GN=CYTB5-E PE=1 SV=2	1	18.1561	18.2947	18.1683	18.1631	18.2966	18.2334	18.2632	18.2128	18.4839	18.704	18.6083	18.7036	18.2443	18.2305	18.2146	18.1495	18.3072	18.1485	18.1631	18.1022	18.2162	18.3023	18.1289	18.8448	18.9207	18.8039	18.7322	18.333	18.1715	18.2107	18.27	6	64.9	15.084	134	0	270.12	18.3271	18.4587	18.3139	18.3014	18.4254	18.397	18.4306
P28769	P28769	T-complex protein 1 subunit alpha	CCT1	sp|P28769|TCPA_ARATH T-complex protein 1 subunit alpha OS=Arabidopsis thaliana GN=CCT1 PE=1 SV=1	1	20.054	20.0146	20.0072	20.0362	20.1515	20.1785	20.2153	20.1748	20.2794	20.2984	20.293	20.176	20.082	20.0683	20.0466	20.0734	20.0188	20.0759	20.1975	20.2551	20.129	20.3235	20.3524	20.0143	20.0695	20.0286	20.0304	20.0206	20.1146	20.2304	20.1451	28	64.8	59.229	545	0	323.31	20.0329	19.9865	19.9607	19.9825	20.0882	20.15	20.1906
Q93VI3	Q93VI3	60S ribosomal protein L17-1	RPL17A	sp|Q93VI3|RL171_ARATH 60S ribosomal protein L17-1 OS=Arabidopsis thaliana GN=RPL17A PE=2 SV=1	1	15.5442	15.489	15.4194	15.5521	15.2738	15.3115	15.2005	15.42	15.3081	15.3013	15.4191	15.2838	15.3401	15.2998	15.3039	15.2814	15.3	15.3779	15.445	15.3924	15.3921	15.334	15.2407	15.2796	15.3142	15.2055	15.3551	14.9268	15.1329	15.3787	15.1369	14	64.8	19.897	176	0	5.4195	15.5071	15.4448	15.3568	15.4823	15.1944	15.2669	15.1598
Q9FI56	Q9FI56	Chaperone protein ClpC1, chloroplastic	CLPC1	sp|Q9FI56|CLPC1_ARATH Chaperone protein ClpC1, chloroplastic OS=Arabidopsis thaliana GN=CLPC1 PE=1 SV=1	1	21.5978	21.6255	21.7215	21.8306	21.6886	21.6804	21.4634	21.6875	21.5862	21.4255	21.4134	21.5095	21.7557	21.8135	21.8012	21.7553	21.917	21.9136	21.8644	21.9265	21.9496	21.8789	21.864	21.6389	21.5963	21.7045	21.6604	21.8514	21.921	22.059	21.9476	70	64.7	103.45	929	0	323.31	21.4424	21.4632	21.5407	21.6426	21.4911	21.5177	21.3045
F4JTK8	F4JTK8	Aminoacylase-1	At4g38220	tr|F4JTK8|F4JTK8_ARATH Aminoacylase-1 OS=Arabidopsis thaliana GN=At4g38220 PE=3 SV=1	1	18.9509	19.0531	18.8853	18.7679	18.9361	18.93	18.8309	18.8095	18.8716	19.0228	18.9293	18.975	18.8816	18.8384	18.8315	18.9023	18.9975	18.8692	18.7261	18.8401	18.8509	18.7611	18.7328	18.9266	18.9447	18.9936	18.9213	18.9067	18.7959	18.8047	18.8815	23	64.7	48.037	433	0	285.44	18.8766	18.9718	18.7856	18.661	18.8197	18.8483	18.753
Q56XG6	Q56XG6	DEAD-box ATP-dependent RNA helicase 15	RH15	sp|Q56XG6|RH15_ARATH DEAD-box ATP-dependent RNA helicase 15 OS=Arabidopsis thaliana GN=RH15 PE=1 SV=3	1	19.4931	19.4597	19.4294	19.2298	19.4599	19.4516	19.478	19.4461	19.1546	18.9439	18.9892	18.9024	19.2061	19.2095	19.3067	19.3221	19.336	19.1405	19.1078	19.2933	19.2959	19.1774	19.2649	19.0031	18.9431	18.9834	18.9757	19.3577	19.2423	19.2238	19.3783	23	64.6	48.337	427	0	323.31	19.4896	19.4493	19.4005	19.1937	19.4143	19.4407	19.471
O23095	O23095	60S acidic ribosomal protein P1-2	RPP1B	sp|O23095|RLA12_ARATH 60S acidic ribosomal protein P1-2 OS=Arabidopsis thaliana GN=RPP1B PE=1 SV=2	1	18.2727	18.2304	18.3705	18.2798	18.2229	18.2535	18.2338	18.3244	18.228	18.2556	18.3596	18.2798	18.0821	18.2178	18.314	18.2424	17.9815	18.1812	18.2515	18.2507	18.1173	18.0758	18.0404	17.9871	18.1092	18.1594	18.1834	17.6304	17.8296	18.0612	17.7669	5	64.6	11.307	113	0	185.56	18.2074	18.158	18.2798	18.1819	18.1154	18.1808	18.165
P38418;REV__F4J364	P38418	Lipoxygenase 2, chloroplastic	LOX2	sp|P38418|LOX2_ARATH Lipoxygenase 2, chloroplastic OS=Arabidopsis thaliana GN=LOX2 PE=1 SV=1	2	20.2156	20.3142	20.377	20.1206	20.496	20.3859	20.2836	20.2464	20.7412	21.1445	20.6533	20.9619	20.267	20.3799	20.9848	20.5032	20.4613	20.588	20.2302	20.6245	20.5257	20.5475	20.5604	20.3647	20.5119	20.2679	20.1126	20.5339	20.1511	20.7585	20.4643	57	64.5	102.04	896	0	323.31	20.3466	20.4382	20.4826	20.219	20.5848	20.5095	20.411
Q9SR37;Q9LKR7	Q9SR37	Beta-glucosidase 23	BGLU23	sp|Q9SR37|BGL23_ARATH Beta-glucosidase 23 OS=Arabidopsis thaliana GN=BGLU23 PE=1 SV=1	2	21.3331	21.2279	20.9384	20.7972	21.3744	21.4164	21.3206	21.0699	20.9634	21.1168	20.9298	20.7005	21.292	20.9214	20.6699	21.0188	21.3287	21.1532	20.9738	20.5832	20.6924	20.7483	20.8503	20.6734	20.7536	20.7462	20.7846	21.5269	21.3752	20.7839	21.3433	28	64.5	59.72	524	0	323.31	21.7205	21.6083	21.3004	21.1521	21.7197	21.7965	21.7045
F4HQD4	F4HQD4	Heat shock 70 kDa protein 15	HSP70-15	sp|F4HQD4|HSP7P_ARATH Heat shock 70 kDa protein 15 OS=Arabidopsis thaliana GN=HSP70-15 PE=1 SV=1	1	17.5696	17.5795	17.3978	17.3128	17.7494	17.7748	17.8395	17.6794	17.2274	17.1158	17.1163	17.1801	17.4048	17.3309	17.384	17.3445	17.4977	17.1946	17.0175	17.3719	17.4469	17.3739	17.4217	17.1601	17.189	17.2171	17.1632	17.5164	17.4406	17.4171	17.4158	45	64.4	91.68	831	0	323.31	18.1002	18.1031	17.9031	17.8108	18.2379	18.298	18.3666
Q42547	Q42547	Catalase-3	CAT3	sp|Q42547|CATA3_ARATH Catalase-3 OS=Arabidopsis thaliana GN=CAT3 PE=1 SV=3	1	21.6711	21.7762	21.9691	21.7919	21.5696	21.0601	21.1095	21.4851	21.8934	22.1057	21.8146	21.938	21.7285	21.8382	21.8365	21.7779	21.5573	21.6748	21.6739	22.0097	21.7664	21.8734	21.8149	21.8886	21.6837	21.639	21.7162	22.0713	22.1303	21.8818	22.1768	30	64.4	56.695	492	0	323.31	21.9424	22.0405	22.215	22.0306	21.7988	21.324	21.3773
Q9FM01	Q9FM01	UDP-glucose 6-dehydrogenase 4	UGD4	sp|Q9FM01|UGDH4_ARATH UDP-glucose 6-dehydrogenase 4 OS=Arabidopsis thaliana GN=UGD4 PE=1 SV=1	1	18.1318	18.0427	17.9671	17.7936	18.1294	18.0992	18.1664	18.0121	17.7667	17.6955	17.7424	17.6988	17.8984	17.887	18.0136	17.9667	18.0074	18.0449	17.8573	18.0027	18.0449	17.9486	17.9992	17.9164	17.9355	17.931	17.9254	18.1463	18.0423	18.1109	18.1247	26	64.4	53.096	480	0	162.08	18.236	18.1399	18.0459	17.8652	18.1914	18.1959	18.267
Q9M885	Q9M885	40S ribosomal protein S7-2	RPS7B	sp|Q9M885|RS72_ARATH 40S ribosomal protein S7-2 OS=Arabidopsis thaliana GN=RPS7B PE=2 SV=1	1	19.8947	19.8091	19.8609	19.8002	19.7501	19.6837	19.7711	19.7523	19.7094	19.7176	19.7912	19.7576	19.6729	19.7235	19.7532	19.6815	19.6362	19.6728	19.705	19.769	19.6921	19.6554	19.6481	19.6637	19.717	19.7193	19.7179	19.4727	19.4892	19.5822	19.4746	14	64.4	22.196	191	0	280.25	20.0542	19.9616	19.9949	19.9271	19.8675	19.8358	19.927
Q9M0A7	Q9M0A7		At4g30530	sp|Q9M0A7|GGP1_ARATH Gamma-glutamyl peptidase 1 OS=Arabidopsis thaliana GN=GGP1 PE=1 SV=1	1	18.5338	18.691	18.5956	18.5971	18.821	18.7597	18.7682	18.7422	17.8926	17.61	17.6938	17.636	18.5795	18.5279	18.4294	18.5427	18.3205	18.2068	18.0945	18.7403	18.6445	18.8319	18.9164	18.237	18.1832	18.2789	18.1526	18.8843	18.9596	18.5352	18.9084	12	64.4	28.385	250	0	180.21	18.873	19.0232	18.9094	18.9037	19.118	19.0915	19.1038
Q8GRX2	Q8GRX2	Eukaryotic translation initiation factor 3 subunit J	At5g37475	tr|Q8GRX2|Q8GRX2_ARATH Eukaryotic translation initiation factor 3 subunit J OS=Arabidopsis thaliana GN=At5g37475 PE=1 SV=1	1	17.8408	17.9015	17.883	17.8862	17.9626	18.0003	18.0422	17.9804	18.2151	18.5055	18.5914	18.5783	17.8333	17.8801	17.8838	17.982	17.5228	17.8392	18.0805	18.0133	17.8278	18.0417	17.9474	18.0604	18.2014	18.3283	18.0538	17.1371	17.3443	17.3269	17.379	11	64.4	25.168	225	0	323.31	17.626	17.6797	17.6428	17.6388	17.7056	17.7782	17.8239
P56765	P56765	Acetyl-coenzyme A carboxylase carboxyl transferase subunit beta, chloroplastic	accD	sp|P56765|ACCD_ARATH Acetyl-coenzyme A carboxylase carboxyl transferase subunit beta, chloroplastic OS=Arabidopsis thaliana GN=accD PE=1 SV=2	1	20.226	20.255	20.3468	20.5094	20.1547	20.1206	20.0468	20.2232	20.2557	20.1234	20.2887	20.0929	20.348	20.444	20.2882	20.3784	20.2713	20.3585	20.3705	20.354	20.3447	20.3507	20.2998	20.2883	20.2226	20.2937	20.3108	20.2964	20.2855	20.4618	20.3897	27	64.3	55.635	488	0	323.31	20.1653	20.1874	20.2607	20.4162	20.0519	20.0526	19.9826
Q8L773	Q8L773	THO complex subunit 4A	ALY1	sp|Q8L773|THO4A_ARATH THO complex subunit 4A OS=Arabidopsis thaliana GN=ALY1 PE=1 SV=1	1	18.5206	18.473	18.5468	18.5492	18.5658	18.4579	18.6201	18.5686	18.7763	18.8355	18.8609	18.9089	18.4926	18.4582	18.5525	18.5169	18.4666	18.5518	18.7926	18.5576	18.495	18.5193	18.5048	18.4995	18.4659	18.7337	18.6198	18.1719	18.2163	18.3262	18.2212	16	64.3	25.755	244	0	252.28	18.569	18.5144	18.5698	18.5651	18.5721	18.4989	18.6649
Q9SRH6	Q9SRH6	Hypersensitive-induced response protein 3	HIR3	sp|Q9SRH6|HIR3_ARATH Hypersensitive-induced response protein 3 OS=Arabidopsis thaliana GN=HIR3 PE=1 SV=1	1	19.3256	19.4405	19.3365	19.231	19.4144	19.1727	19.327	19.3039	19.0978	19.25	19.1766	19.0559	19.4819	19.3905	19.2606	19.1988	18.8532	18.8508	18.7623	19.0942	19.1572	18.8851	18.7625	19.6729	19.5157	19.6254	19.3869	19.2357	18.984	19.0714	19.1661	20	64.2	31.321	285	0	180.27	19.3333	19.4412	19.3188	19.2061	19.3799	19.173	19.3311
Q9LHL7	Q9LHL7		T21B14.13	tr|Q9LHL7|Q9LHL7_ARATH Aha1 domain-containing protein OS=Arabidopsis thaliana GN=T21B14.13 PE=1 SV=1	1	18.7542	18.8624	18.6928	18.6644	19.0906	19.1086	19.0707	19.0758	18.5789	18.4621	18.5079	18.6365	18.7213	18.6837	18.6978	18.6708	18.7574	18.4863	18.4295	18.2989	18.5623	18.4646	18.4017	18.5287	18.4267	18.4572	18.4975	18.694	18.5599	18.4576	18.5711	18	64.2	40.184	360	0	323.31	18.7138	18.815	18.627	18.5914	19.0081	19.0609	19.0268
P31168	P31168	Dehydrin COR47	COR47	sp|P31168|COR47_ARATH Dehydrin COR47 OS=Arabidopsis thaliana GN=COR47 PE=1 SV=2	1	18.7376	18.9668	18.7742	18.9382	18.7841	18.6121	18.7649	18.7592	18.8557	18.7886	18.7776	18.6733	19.3282	19.2139	18.9855	19.1074	18.9753	18.9986	18.9449	18.93	18.9697	18.9893	18.9617	19.3749	19.1547	18.92	19.2837	18.8465	19.0694	18.8297	18.8478	17	64.2	29.896	265	0	323.31	18.9695	19.1916	18.9806	19.1374	18.9738	18.8365	18.9932
Q9M9M9	Q9M9M9	Probable NADH dehydrogenase [ubiquinone] 1 alpha subcomplex subunit 12		sp|Q9M9M9|NDUAC_ARATH Probable NADH dehydrogenase [ubiquinone] 1 alpha subcomplex subunit 12 OS=Arabidopsis thaliana GN=At3g03100 PE=1 SV=1	1	16.4917	16.719	16.6833	16.9473	16.7664	16.6489	16.6439	16.6734	17.3762	17.5862	17.5487	17.7418	16.8412	16.9888	16.9251	16.8858	16.7948	16.6751	16.8176	16.8196	16.98	16.9325	16.6493	17.667	17.683	17.3758	17.4101	16.8309	16.6109	16.8237	16.7338	8	64.2	18.316	159	0	35.381	16.8275	17.0477	16.9937	17.2504	17.06	16.9772	16.9761
O50008;O22824	O50008	5-methyltetrahydropteroyltriglutamate--homocysteine methyltransferase 1	MS1	sp|O50008|METE1_ARATH 5-methyltetrahydropteroyltriglutamate--homocysteine methyltransferase 1 OS=Arabidopsis thaliana GN=MS1 PE=1 SV=1	2	22.3003	22.3265	22.2709	22.1995	22.0185	22.1789	22.1516	22.3011	21.6873	21.4599	21.597	21.5438	22.2593	22.1591	22.09	22.2161	21.9828	21.8442	21.762	22.3009	22.2651	22.1984	22.3656	21.6184	21.6177	21.7138	21.6641	22.4034	22.3567	22.1524	22.2988	49	64.1	84.356	765	0	323.31	22.3058	22.325	22.251	22.1724	21.9819	22.177	22.1535
Q9LJE4	Q9LJE4	Chaperonin 60 subunit beta 2, chloroplastic	CPN60B2	sp|Q9LJE4|CPNB2_ARATH Chaperonin 60 subunit beta 2, chloroplastic OS=Arabidopsis thaliana GN=CPN60B2 PE=1 SV=1	1	18.7087	18.7297	18.6208	18.6655	18.902	18.8787	18.9477	18.8438	18.5279	18.5079	18.6538	18.6577	18.6952	18.7416	18.6422	18.7432	18.7006	18.6769	18.5549	18.6719	18.7596	18.8138	18.7813	18.767	18.8204	18.7558	18.7617	18.764	18.8679	18.7671	18.8072	36	64.1	63.341	596	0	269.8	18.8538	18.8678	18.7405	18.778	19.005	19.0163	19.0892
Q9SI58	Q9SI58		At2g03820	tr|Q9SI58|Q9SI58_ARATH Nonsense-mediated mRNA decay protein 3 OS=Arabidopsis thaliana GN=At2g03820 PE=2 SV=1	1	19.7816	19.7672	19.7608	19.6896	19.8344	19.8175	19.8805	19.8324	19.7454	19.898	19.9619	19.9398	19.6799	19.6769	19.7835	19.8276	19.4334	19.4401	19.4962	19.6157	19.4926	19.5259	19.5275	19.4484	19.5604	19.597	19.4055	19.1471	19.1716	19.2832	19.2237	28	64.1	59.293	516	0	323.31	19.912	19.8906	19.8657	19.7874	19.9226	19.9405	20.0073
Q42418	Q42418	Profilin-2	PRO2	sp|Q42418|PROF2_ARATH Profilin-2 OS=Arabidopsis thaliana GN=PRO2 PE=2 SV=1	1	17.1952	17.2592	17.2468	17.311	17.147	17.1927	17.117	17.1378	17.3764	17.2247	17.2804	17.3956	17.4786	17.4343	17.3586	17.4659	17.3036	17.4536	17.2804	17.4573	17.4748	17.4026	17.3512	17.863	17.684	17.7371	17.8164	17.5557	17.636	17.5131	17.4733	6	64.1	13.998	131	0	121.71	17.0914	17.1484	17.1176	17.1746	17.001	17.0814	17.0096
Q9LM02	Q9LM02	Cycloartenol-C-24-methyltransferase	SMT1	sp|Q9LM02|SMT1_ARATH Cycloartenol-C-24-methyltransferase OS=Arabidopsis thaliana GN=SMT1 PE=1 SV=1	1	18.3842	18.3279	18.285	18.1549	18.3831	18.4094	18.3438	18.2916	18.1918	18.0995	18.0103	18.1053	18.3505	18.3012	18.3457	18.2301	18.3	18.2088	18.1421	18.201	18.2637	18.1518	18.1087	18.6872	18.7684	18.8227	18.7103	18.2553	18.0133	18.2108	18.1704	17	64	38.268	336	0	302.05	18.5	18.4366	18.3753	18.2381	18.4567	18.5178	18.456
Q9LMK7	Q9LMK7	Ran-binding protein 1 homolog a	RANBP1A	sp|Q9LMK7|RBP1A_ARATH Ran-binding protein 1 homolog a OS=Arabidopsis thaliana GN=RANBP1A PE=1 SV=1	1	17.934	18.0909	17.7526	17.7548	17.9572	18.0639	17.9108	17.7944	17.6347	17.3571	17.3209	17.4612	18.0375	17.9059	17.8628	18.023	17.9731	17.8657	17.6806	17.9488	18.033	17.8403	17.9345	18.0507	17.9092	17.958	17.9416	17.8991	17.9472	17.909	17.8678	13	64	25.601	228	0	57.293	18.268	18.4178	18.0611	18.0562	18.2489	18.3904	18.2411
Q940U9	Q940U9		At5g17440	tr|Q940U9|Q940U9_ARATH AT5g17440/K3M16_10 OS=Arabidopsis thaliana GN=At5g17440 PE=2 SV=1	1	17.4321	17.381	17.4827	17.489	17.4488	17.3791	17.3789	17.4943	17.3171	17.3816	17.4028	17.3694	17.3424	17.4512	17.482	17.5294	17.3695	17.3742	17.4015	17.4641	17.4345	17.4765	17.5287	17.3623	17.2733	17.3193	17.3074	17.2492	17.239	17.3162	17.2437	27	63.9	47.228	404	0	83.907	17.6657	17.6075	17.6908	17.69	17.6401	17.6052	17.6088
Q93WN0	Q93WN0	Selenium-binding protein 2	SBP2	sp|Q93WN0|SEBP2_ARATH Selenium-binding protein 2 OS=Arabidopsis thaliana GN=SBP2 PE=1 SV=1	1	19.1196	19.1932	19.2311	19.2456	19.0964	19.1161	19.0305	19.0868	18.8185	18.6305	18.5938	18.6264	19.1964	19.0989	19.073	19.1654	19.3507	19.1695	18.821	19.2676	19.3285	19.2416	19.3761	18.5691	18.4558	18.5939	18.5928	19.2316	19.3261	19.218	19.2053	23	63.9	53.937	487	0	323.31	19.1945	19.261	19.2805	19.2879	19.1291	19.1835	19.1019
Q9SMX3	Q9SMX3	Mitochondrial outer membrane protein porin 3	VDAC3	sp|Q9SMX3|VDAC3_ARATH Mitochondrial outer membrane protein porin 3 OS=Arabidopsis thaliana GN=VDAC3 PE=1 SV=3	1	18.4583	18.752	18.6099	18.6196	18.8251	18.7121	18.7038	18.6359	19.5102	19.8817	19.5328	19.7945	18.9351	18.988	18.932	18.8056	18.8076	18.7016	18.8395	18.5265	18.7134	18.7807	18.6417	19.6032	19.6498	19.3666	19.3733	18.8335	18.6666	18.7261	18.7939	12	63.9	29.21	274	0	323.31	19.3047	19.5914	19.4309	19.4335	19.6293	19.5511	19.5466
Q9SFB1	Q9SFB1		F17A17.37	tr|Q9SFB1|Q9SFB1_ARATH F17A17.37 protein OS=Arabidopsis thaliana GN=F17A17.37 PE=2 SV=1	1	17.3388	17.2796	17.5163	18.4537	17.3926	17.2132	17.3554	17.4397	18.318	18.3104	18.1237	17.8341	17.6855	17.7519	17.5855	17.7261	17.9221	18.25	18.7208	18.2574	18.223	18.6524	18.6901	18.2127	18.1415	17.9317	18.3503	17.633	18.3788	18.8956	18.0573	17	63.8	39.065	365	0	223.43	17.2651	17.1988	17.4172	18.3474	17.2768	17.1321	17.2781
Q0WP12;O80562	Q0WP12	Thiocyanate methyltransferase 1	HOL1	sp|Q0WP12|HOL1_ARATH Thiocyanate methyltransferase 1 OS=Arabidopsis thaliana GN=HOL1 PE=1 SV=1	2	17.8661	17.9036	17.7917	17.8629	17.9213	18.0377	18.0083	17.8234	18.0364	17.8317	17.8075	17.9129	17.9996	17.8921	17.7123	17.9247	17.8934	17.8261	17.7809	17.901	17.9978	17.8953	17.9171	18.2517	18.1261	18.3442	18.2961	18.2066	18.2345	17.9381	17.9678	11	63.8	27.408	246	0	145.92	17.8354	17.8659	17.7356	17.7996	17.8484	17.9996	17.974
Q9LIN0	Q9LIN0		At3g26450	tr|Q9LIN0|Q9LIN0_ARATH Major latex protein, putative OS=Arabidopsis thaliana GN=At3g26450 PE=1 SV=1	1	17.2501	17.2675	17.0995	17.14	17.257	17.465	17.5763	17.1655	16.8261	16.7833	16.7385	16.7567	17.2228	17.1192	17.0186	17.167	17.1191	16.9903	16.9181	17.1262	17.2153	17.118	17.2039	17.2342	17.1445	17.198	17.2407	17.3889	17.5268	17.0677	17.3268	8	63.8	17.791	152	0	68.994	17.3031	17.3135	17.1271	17.1604	17.2678	17.5107	17.6258
O22842	O22842		At2g43610	sp|O22842|CHI61_ARATH Endochitinase At2g43610 OS=Arabidopsis thaliana GN=At2g43610 PE=2 SV=1	1	18.1103	18.0654	18.2545	18.1084	18.5071	18.1817	18.2489	18.2868	18.3782	18.2506	18.44	18.4812	17.9156	17.8091	18.1138	18.0175	17.676	17.9024	17.8213	18.0163	17.773	18.2134	18.0795	17.2339	17.2314	17.3619	17.3415	17.8909	17.8013	17.9818	17.796	17	63.7	29.999	281	0	233.44	18.0737	18.0218	18.1925	18.0393	18.4284	18.1378	18.2088
P48349	P48349	14-3-3-like protein GF14 lambda	GRF6	sp|P48349|14336_ARATH 14-3-3-like protein GF14 lambda OS=Arabidopsis thaliana GN=GRF6 PE=1 SV=1	1	18.8309	18.8268	18.735	18.6056	18.7158	18.6801	18.8259	18.7296	18.2941	18.0445	18.1314	18.085	18.7755	18.7375	18.6517	18.7228	18.5717	18.4426	18.3875	18.6514	18.6933	18.6048	18.6825	18.5614	18.5423	18.5856	18.6056	18.7788	18.6938	18.5699	18.6528	14	63.7	27.975	248	0	155.69	19.1626	19.1514	19.0412	18.9047	19.0053	19.0044	19.154
Q9ZSK2	Q9ZSK2	Actin-depolymerizing factor 6	ADF6	sp|Q9ZSK2|ADF6_ARATH Actin-depolymerizing factor 6 OS=Arabidopsis thaliana GN=ADF6 PE=1 SV=1	1	16.0103	16.0229	16.1596	16.2214	16.2948	16.2996	16.2446	16.3097	16.066	15.9366	15.9515	16.1117	16.1307	16.0816	16.1192	16.1548	16.1058	16.0675	15.9656	16.3661	16.3175	16.2862	16.3048	15.9367	15.8841	15.9352	15.8647	15.8744	16.0892	16.1476	16.0377	6	63.7	16.708	146	0	56.069	16.2726	16.2782	16.3965	16.4511	16.5149	16.5545	16.5034
Q94K05	Q94K05	T-complex protein 1 subunit theta	CCT8	sp|Q94K05|TCPQ_ARATH T-complex protein 1 subunit theta OS=Arabidopsis thaliana GN=CCT8 PE=1 SV=1	1	19.7162	19.6782	19.636	19.6943	19.9052	19.9226	19.9354	19.9026	19.8222	19.8341	19.8544	19.7375	19.7166	19.6797	19.6564	19.7005	19.6847	19.7416	19.8737	20.0528	19.9267	20.0987	20.1476	19.4969	19.5377	19.5449	19.4969	19.7749	19.9473	20.0398	19.9144	29	63.6	58.939	549	0	323.31	19.7656	19.7207	19.6601	19.7112	19.9125	19.9647	19.9813
Q42064;Q4PSL7	Q42064	60S ribosomal protein L8-3	RPL8C	sp|Q42064|RL83_ARATH 60S ribosomal protein L8-3 OS=Arabidopsis thaliana GN=RPL8C PE=1 SV=2	2	18.4013	18.3688	18.3324	18.3122	18.2717	18.2142	18.2914	18.3125	18.1975	18.2194	18.2625	18.2396	18.2322	18.2703	18.3237	18.2649	18.2464	18.2874	18.2421	18.2479	18.2106	18.1699	18.1593	18.2021	18.1823	18.1912	18.2017	18.1652	18.1929	18.2529	18.0831	20	63.6	27.948	258	0	323.31	18.0845	18.0449	17.9901	17.9627	17.9127	17.8899	17.971
P59223	P59223	40S ribosomal protein S13-1	RPS13A	sp|P59223|RS131_ARATH 40S ribosomal protein S13-1 OS=Arabidopsis thaliana GN=RPS13A PE=2 SV=1	1	21.3502	21.2907	21.2919	21.2951	21.1483	21.0909	21.188	21.2549	21.147	21.1352	21.2516	21.2026	21.2221	21.2425	21.1114	21.0794	20.9593	20.9695	21.0194	21.0784	20.9882	20.9315	20.9601	20.9575	20.9717	20.9668	20.976	20.8284	20.7777	20.8859	20.7224	14	63.6	17.095	151	0	128.15	21.3114	21.2449	21.2277	21.2237	21.0674	21.0447	21.1456
P59224	P59224	40S ribosomal protein S13-2	RPS13B	sp|P59224|RS132_ARATH 40S ribosomal protein S13-2 OS=Arabidopsis thaliana GN=RPS13B PE=2 SV=1	1	18.4992	18.4868	18.5038	18.6164	18.3012	18.5638	18.5167	18.5557	18.8573	19.04	19.0548	19.1489	18.5034	18.5022	18.5416	18.4455	18.4819	18.4581	18.5779	18.4159	18.4612	18.3695	18.42	18.4945	18.519	18.5098	18.6264	18.3672	18.4004	18.3965	18.3121	14	63.6	17.085	151	0	35.133	19.302	19.2826	19.2812	19.3866	19.0618	19.3592	19.3159
P12411	P12411	Tubulin beta-1 chain	TUBB1	sp|P12411|TBB1_ARATH Tubulin beta-1 chain OS=Arabidopsis thaliana GN=TUBB1 PE=2 SV=1	1	16.2352	16.1541	16.1703	16.1573	15.9224	15.9889	15.9538	16.0958	15.6329	15.2612	15.4457	15.3269	16.222	16.2497	16.1571	16.1606	16.0725	16.2299	16.18	16.3805	16.3699	16.0987	16.2949	16.1616	16.1042	16.0361	16.2048	16.277	16.3696	16.3732	16.3608	23	63.5	50.217	447	0	129.53	16.1165	16.0284	16.0262	16.006	15.7616	15.8628	15.8315
Q9SW18	Q9SW18	Magnesium protoporphyrin IX methyltransferase, chloroplastic	CHLM	sp|Q9SW18|CHLM_ARATH Magnesium protoporphyrin IX methyltransferase, chloroplastic OS=Arabidopsis thaliana GN=CHLM PE=1 SV=1	1	18.6658	18.7458	18.7664	18.7419	18.7973	18.6771	18.6137	18.6181	19.0223	19.1447	19.1604	19.4917	19.2363	19.0129	19.3141	19.0064	19.1365	19.0241	18.9006	18.7708	18.8225	18.8065	18.7632	19.3914	19.3608	19.3727	19.6344	19.4538	19.0769	19.3821	19.1389	18	63.5	33.795	312	0	185.93	18.6599	18.7329	18.7352	18.7035	18.7493	18.6638	18.6043
Q7XA68	Q7XA68		At3g01790	tr|Q7XA68|Q7XA68_ARATH At1g01640 OS=Arabidopsis thaliana GN=At3g01790 PE=1 SV=1	1	17.5205	17.4954	17.5201	17.4976	17.5325	17.4689	17.5474	17.5968	17.621	17.8592	17.875	17.8556	17.5108	17.5241	17.576	17.4417	17.3946	17.4289	17.5589	17.6344	17.6118	17.6049	17.5424	17.7767	17.8311	17.6853	17.6136	17.0541	16.972	17.1875	16.9987	16	63.4	23.38	205	0	67.287	17.9307	17.8985	17.9048	17.8751	17.9005	17.8717	17.954
Q9LSA3;Q9C8F7	Q9LSA3;Q9C8F7	60S ribosomal protein L30-3;Putative 60S ribosomal protein L30-1	RPL30C;RPL30A	sp|Q9LSA3|RL303_ARATH 60S ribosomal protein L30-3 OS=Arabidopsis thaliana GN=RPL30C PE=3 SV=1;sp|Q9C8F7|RL301_ARATH Putative 60S ribosomal protein L30-1 OS=Arabidopsis thaliana GN=RPL30A PE=3 SV=1	2	20.4021	20.3807	20.3823	20.345	20.2879	20.2078	20.3204	20.3503	20.1834	20.1488	20.2674	20.1899	20.2201	20.2225	20.251	20.2283	20.0551	20.1181	20.1475	20.2997	20.1827	20.1913	20.161	20.0976	20.0838	20.0848	20.1417	19.9102	19.9216	20.2502	19.9022	10	63.4	12.279	112	0	194.13	20.7307	20.7023	20.6855	20.641	20.5743	20.529	20.6454
Q8VZ19	Q8VZ19	60S ribosomal protein L30-2	RPL30B	sp|Q8VZ19|RL302_ARATH 60S ribosomal protein L30-2 OS=Arabidopsis thaliana GN=RPL30B PE=3 SV=1	1	17.3446	17.2024	17.2539	17.1846	17.1599	17.1257	17.1775	17.2464	17.0616	16.9614	17.1017	17.0382	17.0538	17.0819	17.197	17.1239	16.9095	16.9436	17.0086	16.8386	16.6773	16.648	16.6746	16.8714	16.921	16.8725	16.8794	16.8227	16.787	16.9143	16.7835	9	63.4	12.29	112	0	181.64	17.3292	17.18	17.213	17.1366	17.1024	17.1029	17.1586
P29513;CON__ENSEMBL:ENSBTAP00000025008	P29513	Tubulin beta-5 chain	TUBB5	sp|P29513|TBB5_ARATH Tubulin beta-5 chain OS=Arabidopsis thaliana GN=TUBB5 PE=2 SV=1	2	18.252	18.2588	18.2775	18.3868	18.1183	18.1506	18.1376	18.2324	17.9659	17.6945	17.7578	17.7365	18.3274	18.3181	18.191	18.2444	18.2677	18.3519	18.2905	18.3994	18.3933	18.4059	18.4918	18.2151	18.1064	18.2131	18.2822	18.3896	18.4824	18.5146	18.5051	24	63.3	50.342	449	0	323.31	18.023	18.0229	18.0231	18.1252	17.8471	17.9142	17.9051
Q38946	Q38946	Glutamate dehydrogenase 2	GDH2	sp|Q38946|DHE2_ARATH Glutamate dehydrogenase 2 OS=Arabidopsis thaliana GN=GDH2 PE=1 SV=1	1	20.1354	19.8242	19.6237	19.2975	20.7467	20.1994	20.9197	20.0883	19.2606	19.5082	19.422	19.4807	19.4191	19.3356	19.4455	19.5139	19.2089	19.0867	18.9975	19.4898	19.3108	19.4395	19.4634	19.2925	19.2178	19.3389	19.1727	19.7183	19.5082	19.0804	19.689	23	63.3	44.699	411	0	323.31	20.0751	19.7569	19.538	19.2046	20.6442	20.1317	20.8558
Q9LW17	Q9LW17		At3g15610	tr|Q9LW17|Q9LW17_ARATH Expressed protein OS=Arabidopsis thaliana GN=At3g15610 PE=2 SV=1	1	17.081	17.1369	17.0515	17.0763	16.9406	17.0962	17.0448	17.1408	16.7562	16.6028	16.6799	16.5357	17.0963	17.0986	17.0223	17.1605	16.8507	16.833	16.8556	17.0034	17.0487	17.0007	17.0408	16.9451	17.0481	17.0309	17.0648	16.9539	16.9176	16.8887	16.936	18	63.3	37.355	341	0	117.17	17.123	17.1719	17.0681	17.0857	16.9404	17.1308	17.0833
Q9FFS8	Q9FFS8	40S ribosomal protein S10-2	RPS10B	sp|Q9FFS8|RS102_ARATH 40S ribosomal protein S10-2 OS=Arabidopsis thaliana GN=RPS10B PE=2 SV=1	1	19.5924	19.3653	19.5	19.358	19.4387	19.3596	19.4457	19.418	19.1852	19.0458	19.2197	19.0807	19.2766	19.3109	19.4136	19.3115	19.1639	19.2327	19.2462	19.2967	19.1966	19.1423	19.108	19.1743	19.1323	19.1811	19.1333	19.0245	18.8965	19.0241	18.847	17	63.3	19.733	180	0	202.23	19.6857	19.4515	19.5679	19.4187	19.4898	19.4455	19.5355
P34066	P34066	Proteasome subunit alpha type-1-A	PAF1	sp|P34066|PSA1A_ARATH Proteasome subunit alpha type-1-A OS=Arabidopsis thaliana GN=PAF1 PE=1 SV=3	1	18.9627	18.8204	18.7771	18.5715	18.925	18.928	19.2068	18.9357	18.5838	18.5327	18.5994	18.6379	18.712	18.6153	18.7101	18.7553	18.44	18.4745	18.3745	18.7895	18.6565	18.726	18.7157	18.8362	18.9483	18.9205	18.7505	18.6076	18.5816	18.4371	18.5625	16	63.3	30.476	278	0	323.31	18.7646	18.6153	18.5536	18.3408	18.6847	18.7225	19.0052
O04311	O04311	Jacalin-related lectin 33	JAL33	sp|O04311|JAL33_ARATH Jacalin-related lectin 33 OS=Arabidopsis thaliana GN=JAL33 PE=1 SV=1	1	18.7086	18.8096	18.5438	18.3655	18.7231	18.7959	18.7659	18.5266	18.5396	18.7705	18.5161	18.3586	18.8671	18.4072	18.3017	18.5473	18.4729	18.3418	18.221	18.1217	18.3295	18.3675	18.5346	18.2263	18.3347	18.3683	18.3881	18.9722	18.9385	18.276	18.8104	15	63.3	32.022	300	0	323.31	18.7113	18.8053	18.521	18.3355	18.6836	18.7912	18.765
Q39043	Q39043	Mediator of RNA polymerase II transcription subunit 37f	MED37F	sp|Q39043|MD37F_ARATH Mediator of RNA polymerase II transcription subunit 37f OS=Arabidopsis thaliana GN=MED37F PE=1 SV=2	1	20.9828	21.005	20.8627	20.7745	21.167	21.1558	21.1286	21.0047	21.007	21.1434	21.0589	21.1005	20.8763	20.8182	20.8808	20.865	21.1104	20.96	20.8629	20.7209	20.7103	20.7807	20.7786	21.0341	21.1047	21.0882	20.9428	20.9324	20.8323	20.6495	20.863	35	63.2	73.56	668	0	323.31	20.7852	20.8004	20.6397	20.5443	20.9272	20.9508	20.9275
Q9LKR3	Q9LKR3	Mediator of RNA polymerase II transcription subunit 37a	MED37A	sp|Q9LKR3|MD37A_ARATH Mediator of RNA polymerase II transcription subunit 37a OS=Arabidopsis thaliana GN=MED37A PE=1 SV=1	1	18.6186	18.6357	18.5466	18.4615	18.8542	18.8718	18.8141	18.6778	18.6617	18.7521	18.6873	18.7448	18.5382	18.4571	18.5741	18.5463	18.6901	18.608	18.5562	18.5322	18.5025	18.5424	18.5176	18.6932	18.7661	18.7591	18.6393	18.5496	18.4674	18.4728	18.5254	35	63.2	73.628	669	0	148.84	18.7338	18.7439	18.6363	18.544	18.9272	18.9796	18.9258
Q9M2V1	Q9M2V1		T12E18_50	tr|Q9M2V1|Q9M2V1_ARATH AT3g54360/T12E18_50 OS=Arabidopsis thaliana GN=T12E18_50 PE=2 SV=1	1	17.9752	17.9999	17.9384	17.9264	17.8448	17.9376	17.8992	17.9847	17.7448	17.5747	17.5687	17.6594	17.9135	17.8733	17.9359	17.8346	17.9218	17.938	17.8182	18.0182	17.9903	17.9548	18.0687	17.8376	17.8852	17.9217	17.927	17.9105	18.0029	17.9798	17.9572	23	63.2	44.53	405	0	136.46	18.0184	18.036	17.9561	17.9369	17.8457	17.9733	17.9388
Q8L7R2	Q8L7R2	Homoserine kinase	HSK	sp|Q8L7R2|KHSE_ARATH Homoserine kinase OS=Arabidopsis thaliana GN=HSK PE=1 SV=1	1	18.7287	18.6307	18.6136	18.4554	18.8521	18.8186	18.9544	18.7516	18.7548	18.7086	18.8493	18.8271	18.5058	18.4474	18.5733	18.576	18.7248	18.56	18.5875	18.5664	18.4828	18.5562	18.5424	18.4063	18.3782	18.4779	18.4455	18.781	18.7275	18.4716	18.8004	18	63.2	38.528	370	0	182.25	18.7189	18.6138	18.5784	18.413	18.8001	18.8014	18.941
Q9FJY1	Q9FJY1		K1F13.27	tr|Q9FJY1|Q9FJY1_ARATH CAP (Cysteine-rich secretory proteins, Antigen 5, and Pathogenesis-related 1 protein) superfamily protein OS=Arabidopsis thaliana GN=K1F13.27 PE=2 SV=1	1	16.8797	16.9136	16.8847	17.1472	16.7466	16.689	16.6965	16.9363	16.994	16.874	16.9919	16.9204	16.9867	17.028	16.8569	16.913	16.9644	17.1499	17.4025	17.0722	17.1208	17.1072	17.1951	17.1518	16.9427	16.8367	17.1911	17.0929	17.3299	17.3939	17.2116	10	63.2	20.099	185	0	65.565	16.7694	16.7963	16.749	17.0043	16.5941	16.5713	16.5827
P92549	P92549	ATP synthase subunit alpha, mitochondrial	ATPA	sp|P92549|ATPAM_ARATH ATP synthase subunit alpha, mitochondrial OS=Arabidopsis thaliana GN=ATPA PE=1 SV=2	1	20.3599	20.4925	20.5231	20.6369	20.5593	20.5416	20.436	20.5987	20.8314	20.9126	20.8933	20.947	20.793	20.7572	20.6409	20.569	20.6519	20.5214	20.6	20.8046	20.8876	20.8763	20.8226	21.0602	21.0697	20.8237	20.887	20.6413	20.5722	20.6157	20.6332	31	63.1	55.045	507	0	323.31	20.3657	20.4913	20.5035	20.6101	20.523	20.54	20.4383
P49077	P49077	Aspartate carbamoyltransferase, chloroplastic	PYRB	sp|P49077|PYRB_ARATH Aspartate carbamoyltransferase, chloroplastic OS=Arabidopsis thaliana GN=PYRB PE=2 SV=2	1	18.9601	19.1846	19.1187	19.1935	18.7071	18.7733	18.8609	19.0399	18.5964	18.2806	18.2336	18.2641	19.1482	19.2093	18.9033	19.1519	18.9826	18.8602	18.7852	19.1749	19.237	19.2381	19.3978	18.743	18.6215	18.7026	18.7483	19.273	19.2592	19.1518	19.2646	23	63.1	43.166	390	0	173.11	18.8076	19.0251	18.9408	19.0084	18.5124	18.6134	18.7049
Q94AW8	Q94AW8	Chaperone protein dnaJ 3	ATJ3	sp|Q94AW8|DNAJ3_ARATH Chaperone protein dnaJ 3 OS=Arabidopsis thaliana GN=ATJ3 PE=1 SV=2	1	19.6049	19.6525	19.676	19.8175	20.1882	20.2187	20.1259	20.1053	19.6721	19.5616	19.5766	19.6097	19.6883	19.6011	19.6507	19.6557	19.7494	19.9022	19.8766	19.7213	19.7439	19.7972	19.814	19.6727	19.7142	19.7965	19.6656	19.5592	19.6794	19.8626	19.6385	23	63.1	46.444	420	0	323.31	19.6217	19.6623	19.6674	19.8017	20.1629	20.2281	20.1392
O81845	O81845	Mitochondrial uncoupling protein 1	PUMP1	sp|O81845|PUMP1_ARATH Mitochondrial uncoupling protein 1 OS=Arabidopsis thaliana GN=PUMP1 PE=1 SV=1	1	18.1552	18.3326	18.3037	18.3948	18.3847	18.2641	18.2504	18.3175	18.7189	18.9003	18.8075	18.9879	18.4177	18.4905	18.4958	18.3012	18.4576	18.4028	18.4802	18.2456	18.3863	18.4407	18.2617	19.2437	19.2391	19.0033	19.0397	18.4494	18.2891	18.373	18.376	19	63.1	32.662	306	0	133.13	18.2445	18.4149	18.3676	18.4515	18.4318	18.346	18.3362
Q9LFX8	Q9LFX8		At1g27090	tr|Q9LFX8|Q9LFX8_ARATH Putative uncharacterized protein At1g27090 OS=Arabidopsis thaliana GN=At1g27090 PE=1 SV=1	1	19.1202	19.0476	19.0885	18.9757	19.183	19.1734	19.2782	19.1768	19.1213	19.1703	19.231	19.1093	18.8442	18.8479	19.0539	18.9898	19.0062	19.0496	19.2255	19.0301	18.869	19.0523	18.9565	19.0121	19.1213	19.2166	19.0234	18.5429	18.6015	18.626	18.5906	17	63.1	46.018	420	0	323.31	19.4789	19.3994	19.4219	19.3018	19.4996	19.5247	19.6334
P59231	P59231	60S ribosomal protein L10a-3	RPL10AC	sp|P59231|R10A3_ARATH 60S ribosomal protein L10a-3 OS=Arabidopsis thaliana GN=RPL10AC PE=1 SV=1	1	18.3119	18.2894	18.2734	18.2464	18.2431	18.2031	18.2669	18.3015	18.1066	18.116	18.1422	18.172	18.1514	18.1634	18.2823	18.2044	18.1277	18.1926	18.2281	18.0666	17.9864	17.9543	18.0115	18.0293	18.0691	18.0443	18.1048	17.9308	17.9714	18.0965	17.9517	15	63.1	24.532	217	0	61.764	17.9293	17.8998	17.8653	17.8312	17.8183	17.813	17.8808
Q9LYK9	Q9LYK9	40S ribosomal protein S26-3	RPS26C	sp|Q9LYK9|RS263_ARATH 40S ribosomal protein S26-3 OS=Arabidopsis thaliana GN=RPS26C PE=2 SV=1	1	18.6655	18.6724	18.5905	18.5311	18.4532	18.4578	18.5388	18.4229	18.4276	18.2	18.3054	18.4059	18.3873	18.6028	18.5866	18.4692	18.0653	18.2478	18.3546	18.3389	18.2476	18.078	18.0314	18.3543	18.2927	18.2297	18.3047	17.8729	17.92	17.9617	17.727	15	63.1	14.628	130	0	153.7	17.9878	17.9877	17.8873	17.8207	17.7333	17.7727	17.8575
F4IRX7	F4IRX7		SOUL-1	tr|F4IRX7|F4IRX7_ARATH SOUL heme-binding-like protein OS=Arabidopsis thaliana GN=SOUL-1 PE=1 SV=1	1	17.7411	17.8581	17.8395	17.8072	17.8604	17.8701	17.8717	17.7891	18.3906	18.779	18.5406	18.6582	18.0155	17.8872	17.8717	17.8476	17.9983	17.9106	17.908	17.7312	17.8995	17.813	17.7729	17.9799	18.088	18.1043	18.0603	17.9522	17.8728	17.8528	17.8406	13	63.1	24.925	225	0	52.661	17.9118	18.0218	17.9848	17.9453	17.9889	18.0334	18.0389
Q9FZH0	Q9FZH0	60S ribosomal protein L35a-2	RPL35AB	sp|Q9FZH0|R35A2_ARATH 60S ribosomal protein L35a-2 OS=Arabidopsis thaliana GN=RPL35AB PE=3 SV=1	1	20.1723	20.1534	20.1427	20.1125	20.0606	20.0175	20.069	20.1131	19.9959	19.9363	20.0437	20.0363	19.9955	20.037	20.1151	20.0485	19.975	19.9974	19.9985	20.017	19.9387	19.9247	19.8956	19.9035	19.8922	19.8859	19.9297	19.848	19.8573	19.9317	19.7511	8	63.1	12.799	111	0	147.97	20.4486	20.4227	20.3935	20.3562	20.2947	20.2864	20.3417
Q9FFR3	Q9FFR3	6-phosphogluconate dehydrogenase, decarboxylating 2, chloroplastic		sp|Q9FFR3|6PGD2_ARATH 6-phosphogluconate dehydrogenase, decarboxylating 2, chloroplastic OS=Arabidopsis thaliana GN=At5g41670 PE=1 SV=1	1	19.5123	19.5604	19.4988	19.5949	19.4163	19.5737	19.458	19.5301	19.2239	18.7597	18.9067	18.9002	19.5668	19.4558	19.5063	19.5839	19.7835	19.7232	19.4767	19.6883	19.7146	19.6333	19.716	19.0769	19.042	19.1901	19.1208	19.7268	19.8584	19.9068	19.8188	27	63	53.317	487	0	323.31	19.7259	19.767	19.687	19.7759	19.5877	19.7799	19.6681
F4J6A8	F4J6A8		At3g11450	tr|F4J6A8|F4J6A8_ARATH DnaJ and Myb-like DNA-binding domain-containing protein OS=Arabidopsis thaliana GN=At3g11450 PE=4 SV=1	1	19.7254	19.7449	19.7136	19.705	19.6724	19.6484	19.6832	19.7023	19.5822	19.5379	19.6149	19.5345	19.6457	19.6139	19.6643	19.6509	19.5467	19.5242	19.5953	19.5272	19.4484	19.4838	19.4709	19.6317	19.6333	19.6984	19.6419	19.2538	19.2629	19.2098	19.2306	40	62.9	73.989	647	0	323.31	19.7926	19.8051	19.7554	19.7396	19.6975	19.7082	19.7469
Q9SYM5	Q9SYM5	Trifunctional UDP-glucose 4,6-dehydratase/UDP-4-keto-6-deoxy-D-glucose 3,5-epimerase/UDP-4-keto-L-rhamnose-reductase RHM1;UDP-glucose 4,6-dehydratase;UDP-4-keto-6-deoxy-D-glucose 3,5-epimerase/UDP-4-keto-L-rhamnose 4-keto-reductase	RHM1	sp|Q9SYM5|RHM1_ARATH Trifunctional UDP-glucose 4,6-dehydratase/UDP-4-keto-6-deoxy-D-glucose 3,5-epimerase/UDP-4-keto-L-rhamnose-reductase RHM1 OS=Arabidopsis thaliana GN=RHM1 PE=1 SV=1	1	19.9222	19.9078	19.8545	19.8364	20.0317	20.0917	19.9866	20.0299	19.4259	19.1925	19.3121	19.2012	19.8612	19.883	19.8661	19.9012	19.736	19.7698	19.8102	20.0694	20.0961	19.9004	20.0367	19.6487	19.5941	19.6583	19.6431	20.0777	20.1531	20.172	20.1345	37	62.9	75.371	669	0	323.31	20.005	19.9836	19.9119	19.8866	20.0723	20.1671	20.0658
P25856	P25856	Glyceraldehyde-3-phosphate dehydrogenase GAPA1, chloroplastic	GAPA1	sp|P25856|G3PA1_ARATH Glyceraldehyde-3-phosphate dehydrogenase GAPA1, chloroplastic OS=Arabidopsis thaliana GN=GAPA1 PE=1 SV=3	1	21.0247	21.0003	21.1396	21.26	20.9135	21.0854	21.064	21.0469	20.9836	20.5918	20.7417	20.6384	21.224	21.4008	21.2445	21.1944	21.0566	21.1279	21.2355	21.1953	21.2671	21.092	21.1207	20.7706	20.6355	20.772	20.8115	21.5152	21.5216	21.3284	21.3825	26	62.9	42.489	396	0	323.31	20.992	20.9606	21.0815	21.1948	20.8387	21.0453	21.0278
Q9SQZ1	Q9SQZ1	40S ribosomal protein S17-3	RPS17C	sp|Q9SQZ1|RS173_ARATH 40S ribosomal protein S17-3 OS=Arabidopsis thaliana GN=RPS17C PE=2 SV=3	1	19.5218	19.4699	19.4264	19.3918	19.3673	19.3403	19.4404	19.3871	19.3131	19.3233	19.3766	19.3952	19.282	19.3744	19.5143	19.4129	19.1725	19.1936	19.239	19.2894	19.1751	19.1719	19.1378	19.2914	19.2937	19.262	19.29	19.0359	19.0053	19.091	18.9156	10	62.9	16.036	140	0	283.43	19.5149	19.456	19.3941	19.3523	19.3183	19.326	19.43
F4ISU2	F4ISU2		At2g32240	tr|F4ISU2|F4ISU2_ARATH Uncharacterized protein OS=Arabidopsis thaliana GN=At2g32240 PE=1 SV=1	1	20.6942	20.8764	20.741	20.7309	20.8398	20.8336	20.8317	20.7913	20.6324	20.5049	20.5404	20.5682	20.8062	20.834	20.8235	20.8442	21.0543	20.8855	20.7691	20.6958	20.7491	20.7575	20.6706	21.0218	21.0475	21.0305	20.9222	20.9548	20.8026	20.8111	20.9287	88	62.8	148.61	1333	0	323.31	20.7435	20.9186	20.7648	20.7475	20.8468	20.8755	20.8773
P56791	P56791	50S ribosomal protein L2, chloroplastic	rpl2-A	sp|P56791|RK2_ARATH 50S ribosomal protein L2, chloroplastic OS=Arabidopsis thaliana GN=rpl2-A PE=3 SV=1	1	20.1509	20.1758	20.1492	20.3412	20.1278	20.2762	20.1956	20.2121	20.333	20.219	20.3044	20.1841	20.1637	20.2347	20.0955	20.1027	20.2577	20.2756	20.4243	20.3938	20.3263	20.4052	20.2025	20.1018	20.0287	20.067	20.0648	19.9706	20.1135	20.2382	20.1098	23	62.8	29.864	274	0	323.31	20.4111	20.429	20.384	20.5689	20.3458	20.529	20.4522
O65282	O65282	20 kDa chaperonin, chloroplastic	CPN21	sp|O65282|CH10C_ARATH 20 kDa chaperonin, chloroplastic OS=Arabidopsis thaliana GN=CPN21 PE=1 SV=2	1	19.2814	19.2534	19.265	19.4116	19.3804	19.3842	19.3976	19.3669	19.5543	19.4647	19.4175	19.436	19.6121	19.6027	19.3866	19.5719	19.3299	19.4968	19.4225	19.5134	19.4575	19.6159	19.5263	20.1381	20.0776	19.9593	19.8918	19.3288	19.4172	19.3134	19.249	14	62.8	26.802	253	0	244.83	19.6828	19.6478	19.641	19.7804	19.7397	19.7782	19.7954
Q8W108	Q8W108	1,2-dihydroxy-3-keto-5-methylthiopentene dioxygenase 3	ARD3	sp|Q8W108|MTND3_ARATH 1,2-dihydroxy-3-keto-5-methylthiopentene dioxygenase 3 OS=Arabidopsis thaliana GN=ARD3 PE=2 SV=1	1	17.6665	17.7102	17.5464	17.5401	17.8499	17.921	17.8839	17.7995	17.4474	17.2933	17.2523	17.3503	17.6083	17.5776	17.5581	17.7133	17.5942	17.5698	17.3415	17.7402	17.78	17.6062	17.6994	17.5335	17.4269	17.5084	17.4363	17.6801	17.7282	17.8314	17.6892	11	62.8	23.356	199	0	70.123	17.8859	17.9225	17.7404	17.7268	18.0271	18.133	18.0996
Q9FJX3	Q9FJX3	Mitochondrial outer membrane protein porin 2	VDAC2	sp|Q9FJX3|VDAC2_ARATH Mitochondrial outer membrane protein porin 2 OS=Arabidopsis thaliana GN=VDAC2 PE=1 SV=1	1	18.2558	18.3964	18.3287	18.3221	18.5216	18.4115	18.3362	18.3123	19.0278	19.3523	19.0639	19.3378	18.52	18.5157	18.5907	18.4194	18.4959	18.5154	18.556	18.2401	18.4702	18.4539	18.3087	19.3854	19.4087	19.1296	19.0906	18.5664	18.3409	18.4281	18.4812	18	62.7	29.594	276	0	319.48	18.0724	18.206	18.1199	18.1062	18.2961	18.2208	18.1493
P42697	P42697	Dynamin-related protein 1A	DRP1A	sp|P42697|DRP1A_ARATH Dynamin-related protein 1A OS=Arabidopsis thaliana GN=DRP1A PE=1 SV=3	1	20.2096	20.175	20.212	20.1257	20.292	20.3652	20.3162	20.2225	20.305	20.333	20.3719	20.3328	20.1346	20.0907	20.1723	20.0827	20.1319	20.2101	20.2428	20.0467	20.0157	20.0292	20.0073	20.325	20.3514	20.4685	20.3126	19.9556	19.9804	20.0415	19.9827	45	62.6	68.171	610	0	323.31	20.1887	20.1471	20.1657	20.0722	20.2289	20.3369	20.2918
O04603	O04603	50S ribosomal protein L5, chloroplastic	RPL5	sp|O04603|RK5_ARATH 50S ribosomal protein L5, chloroplastic OS=Arabidopsis thaliana GN=RPL5 PE=2 SV=1	1	20.0302	20.0053	20.0729	20.2167	20.004	19.9195	19.8859	20.066	20.2325	20.172	20.2578	20.2002	20.0501	20.1859	20.116	20.0699	20.1474	20.2337	20.3295	20.2044	20.1183	20.1375	20.0311	20.0111	19.9803	19.986	20.0303	19.8389	20.0289	20.133	19.9971	21	62.6	28.343	262	0	323.31	20.1518	20.1198	20.169	20.3056	20.0834	20.0336	20.0039
Q9LXG1	Q9LXG1	40S ribosomal protein S9-1	RPS9B	sp|Q9LXG1|RS91_ARATH 40S ribosomal protein S9-1 OS=Arabidopsis thaliana GN=RPS9B PE=1 SV=1	1	20.9922	20.9574	20.9613	20.9292	20.8273	20.793	20.8677	20.8803	20.8014	20.7816	20.8483	20.7913	20.7886	20.8759	20.9028	20.8517	20.7434	20.7053	20.7985	20.7629	20.7039	20.6458	20.6829	20.7105	20.7652	20.718	20.801	20.5767	20.521	20.6185	20.4866	18	62.6	23.036	198	0	219.09	20.923	20.8812	20.8667	20.8274	20.716	20.7164	20.795
Q39250	Q39250	Actin-depolymerizing factor 1	ADF1	sp|Q39250|ADF1_ARATH Actin-depolymerizing factor 1 OS=Arabidopsis thaliana GN=ADF1 PE=1 SV=1	1	15.4164	15.4083	15.3355	15.4057	15.3129	15.3249	15.4415	15.4171	15.0902	14.8053	14.9004	14.9261	15.2649	15.1729	15.2357	15.3382	15.4508	15.3839	15.1033	15.3611	15.5186	15.3165	15.3171	14.9572	14.9774	14.881	15.0311	15.518	15.5548	15.4642	15.5486	5	62.6	16.112	139	0	141.31	15.303	15.2879	15.1966	15.2597	15.1573	15.2041	15.3245
Q9ZSK4	Q9ZSK4	Actin-depolymerizing factor 3	ADF3	sp|Q9ZSK4|ADF3_ARATH Actin-depolymerizing factor 3 OS=Arabidopsis thaliana GN=ADF3 PE=1 SV=1	1	17.4444	17.4678	17.3947	17.4984	17.391	17.4021	17.2937	17.3566	17.234	16.571	16.7129	16.6602	17.4823	17.2857	17.1508	17.4273	17.6739	17.5391	17.2987	17.4395	17.4598	17.3984	17.5626	16.866	16.7605	16.8454	16.8679	17.5617	17.6599	17.519	17.5466	5	62.6	15.922	139	0	258.16	17.3878	17.4042	17.3127	17.4091	17.2922	17.338	17.2335
Q9SZ30	Q9SZ30	Imidazole glycerol phosphate synthase hisHF, chloroplastic;Glutamine amidotransferase;Cyclase	HISN4	sp|Q9SZ30|HIS4_ARATH Imidazole glycerol phosphate synthase hisHF, chloroplastic OS=Arabidopsis thaliana GN=HISN4 PE=2 SV=1	1	19.4046	19.468	19.4395	19.4939	19.3087	19.3026	19.3545	19.3702	19.3926	19.3204	19.3507	19.3952	19.4338	19.4899	19.4481	19.4549	19.3832	19.3407	19.3386	19.4138	19.3998	19.4158	19.4179	19.2098	19.1494	19.2247	19.2253	19.3168	19.3379	19.3411	19.3591	38	62.5	64.192	592	0	323.31	19.4905	19.5469	19.5	19.5472	19.3525	19.381	19.4368
Q9LV21	Q9LV21	T-complex protein 1 subunit delta	CCT4	sp|Q9LV21|TCPD_ARATH T-complex protein 1 subunit delta OS=Arabidopsis thaliana GN=CCT4 PE=1 SV=1	1	20.2051	20.1217	20.1434	20.2057	20.3614	20.3766	20.4251	20.3892	20.4437	20.4943	20.4648	20.4059	20.2229	20.2039	20.1814	20.2132	20.1566	20.2444	20.357	20.4177	20.3044	20.5225	20.5257	20.0813	20.1581	20.1174	20.1056	20.125	20.312	20.388	20.2527	33	62.5	57.775	536	0	323.31	20.2621	20.1717	20.175	20.2301	20.3762	20.4262	20.4785
Q9XI01	Q9XI01	Protein disulfide isomerase-like 1-1	PDIL1-1	sp|Q9XI01|PDI11_ARATH Protein disulfide isomerase-like 1-1 OS=Arabidopsis thaliana GN=PDIL1-1 PE=1 SV=1	1	20.0156	20.073	19.9963	19.9464	20.151	20.1226	20.1038	20.0657	20.4065	20.5609	20.4562	20.4898	20.0868	20.0829	20.0774	20.1124	20.2041	20.2455	20.0284	20.0735	20.0442	19.978	19.9869	20.4817	20.5109	20.6408	20.4333	20.116	20.0765	20.094	20.0558	33	62.5	55.601	501	0	323.31	20.1463	20.1966	20.1016	20.0445	20.2396	20.2459	20.2309
Q9STF2	Q9STF2		T6H20.190	sp|Q9STF2|PTA16_ARATH Protein plastid transcriptionally active 16, chloroplastic OS=Arabidopsis thaliana GN=PTAC16 PE=1 SV=1	1	19.6644	19.8769	19.9274	20.1427	19.7957	19.9095	19.6238	19.8707	20.4298	20.4102	20.2126	20.269	20.2108	20.3463	20.3087	20.2509	20.5869	20.6555	20.7514	20.1655	20.3983	20.2032	20.2202	20.3317	20.2183	19.9616	20.1559	20.645	20.7029	20.7889	20.711	32	62.5	54.358	510	0	323.31	19.9785	20.184	20.2161	20.4242	20.0676	20.2162	19.9343
O23255	O23255	Adenosylhomocysteinase 1	SAHH1	sp|O23255|SAHH1_ARATH Adenosylhomocysteinase 1 OS=Arabidopsis thaliana GN=SAHH1 PE=1 SV=1	1	20.4452	20.5158	20.284	20.1667	20.5132	20.5771	20.5445	20.4317	19.7936	19.5483	19.6347	19.587	20.4021	20.1761	20.1623	20.3534	20.1049	20.0884	19.8628	20.4708	20.5101	20.3376	20.4959	20.2953	20.2695	20.3051	20.2294	20.0976	20.1101	20.0615	20.0807	29	62.5	53.378	485	0	323.31	20.4867	20.5503	20.3001	20.1756	20.5126	20.6112	20.5824
Q9XF89;REV__P26568	Q9XF89	Chlorophyll a-b binding protein CP26, chloroplastic	LHCB5	sp|Q9XF89|CB5_ARATH Chlorophyll a-b binding protein CP26, chloroplastic OS=Arabidopsis thaliana GN=LHCB5 PE=1 SV=1	2	19.4598	19.638	19.4579	19.5871	19.7523	19.6467	19.5986	19.4221	20.4557	20.7306	20.373	20.4113	19.9787	20.0176	19.7545	19.7623	20.5454	20.3428	20.1657	19.4752	19.8638	19.8778	19.7987	20.6689	20.6913	19.9834	20.1195	20.7139	20.1702	20.2264	20.4275	15	62.5	30.156	280	0	225.26	19.4339	19.6051	19.4067	19.5287	19.6843	19.6135	19.5692
F4KHD5;REV__Q9SAI1	F4KHD5		At5g40450	tr|F4KHD5|F4KHD5_ARATH Uncharacterized protein OS=Arabidopsis thaliana GN=At5g40450 PE=1 SV=1	2	21.1997	21.237	21.169	21.151	21.3777	21.3915	21.4575	21.347	21.1687	21.1887	21.3574	21.2175	21.3364	21.2985	21.3261	21.3348	21.4202	21.382	21.3282	21.311	21.1595	21.3676	21.2227	21.4015	21.3817	21.2846	21.3868	21.2174	21.2496	21.2038	21.2875	148	62.4	323	2889	0	323.31	21.2718	21.3021	21.2157	21.1906	21.4077	21.4562	21.5261
Q9SXJ7	Q9SXJ7	Chaperone protein ClpC2, chloroplastic	CLPC2	sp|Q9SXJ7|CLPC2_ARATH Chaperone protein ClpC2, chloroplastic OS=Arabidopsis thaliana GN=CLPC2 PE=1 SV=1	1	18.6415	18.772	18.7354	18.8743	18.7129	18.6762	18.5377	18.7398	18.6015	18.4757	18.4585	18.618	18.7867	18.8394	18.7806	18.8023	19.0314	18.9751	18.94	18.8948	18.9834	18.9588	18.8763	18.8053	18.775	18.7371	18.7636	18.9096	18.9771	19.0614	18.9863	60	62.4	105.74	952	0	323.31	18.6516	18.775	18.7201	18.8518	18.6808	18.6789	18.5442
Q93ZT6	Q93ZT6	Eukaryotic translation initiation factor isoform 4G-1	EIF(ISO)4G1	sp|Q93ZT6|IF4G1_ARATH Eukaryotic translation initiation factor isoform 4G-1 OS=Arabidopsis thaliana GN=EIF(ISO)4G1 PE=1 SV=1	1	19.6738	19.6733	19.6911	19.6998	19.6924	19.7095	19.7133	19.7266	19.8719	20.0918	20.0079	20.1178	19.6753	19.6706	19.6818	19.6691	19.7926	19.682	19.7637	19.6976	19.697	19.7432	19.676	19.6547	19.6572	19.7464	19.6943	19.5325	19.5011	19.588	19.5179	45	62.4	85.571	780	0	323.31	19.6903	19.6828	19.6822	19.6837	19.6667	19.7186	19.7263
Q9SYP2	Q9SYP2	Pyrophosphate--fructose 6-phosphate 1-phosphotransferase subunit alpha 1	PFP-ALPHA1	sp|Q9SYP2|PFPA1_ARATH Pyrophosphate--fructose 6-phosphate 1-phosphotransferase subunit alpha 1 OS=Arabidopsis thaliana GN=PFP-ALPHA1 PE=2 SV=1	1	20.0573	20.0347	20.0287	20.0183	20.0117	19.9893	20.0678	20.0434	19.977	19.9578	19.9821	19.9419	19.9685	20.0185	19.9829	19.9899	19.9471	19.9559	20.0254	20.1396	20.0862	20.114	20.1526	19.9416	19.9741	20.0095	19.9546	19.9424	20.0256	20.0871	20.0529	32	62.4	67.118	614	0	323.31	20.0324	20.0028	19.9784	19.9608	19.9446	19.957	20.0394
P17745	P17745	Elongation factor Tu, chloroplastic	TUFA	sp|P17745|EFTU_ARATH Elongation factor Tu, chloroplastic OS=Arabidopsis thaliana GN=TUFA PE=1 SV=1	1	20.8427	20.8664	20.8909	21.0939	20.8009	20.809	20.7308	20.8814	21.0683	20.9518	20.9679	20.999	21.0963	21.0276	20.8459	20.8766	21.1428	21.1832	21.1673	21.0327	21.0709	21.1664	21.1627	20.8545	20.763	20.8857	20.9054	21.0254	21.216	21.1405	21.1011	26	62.4	51.63	476	0	323.31	21.0164	21.0331	21.0393	21.235	20.9325	20.9753	20.9009
Q9ZU25	Q9ZU25	Probable mitochondrial-processing peptidase subunit alpha-1		sp|Q9ZU25|MPPA1_ARATH Probable mitochondrial-processing peptidase subunit alpha-1, mitochondrial OS=Arabidopsis thaliana GN=At1g51980 PE=2 SV=1	1	19.5095	19.754	19.7231	19.8636	19.7851	19.7094	19.6349	19.7476	20.2374	20.5184	20.368	20.5202	19.8953	19.9869	19.9683	19.8497	19.7765	19.7917	19.8639	19.9054	20.0066	19.9425	19.8711	20.4315	20.4233	20.1713	20.2824	19.8999	19.7623	19.8327	19.8453	25	62.4	54.401	503	0	323.31	19.6077	19.8452	19.7959	19.9292	19.8411	19.8002	19.7295
Q9FME2	Q9FME2		At5g60980	tr|Q9FME2|Q9FME2_ARATH AT5g60980/MSL3_100 OS=Arabidopsis thaliana GN=At5g60980 PE=1 SV=1	1	19.1409	19.1438	19.1355	19.1106	19.1035	19.1021	19.2143	19.2001	19.1889	19.2241	19.3487	19.299	19.0059	19.0827	19.0843	19.1362	18.9764	19.0291	19.1824	19.0345	18.8779	19.0247	19.0322	18.9729	19.0544	19.0964	19.0177	18.6201	18.667	18.6916	18.6931	22	62.4	49.543	460	0	323.31	19.3305	19.3263	19.2997	19.2676	19.251	19.2843	19.4003
P49211	P49211	60S ribosomal protein L32-1	RPL32A	sp|P49211|RL321_ARATH 60S ribosomal protein L32-1 OS=Arabidopsis thaliana GN=RPL32A PE=2 SV=2	1	18.0978	18.0981	18.2462	18.2498	18.0852	18.105	18.1654	18.1735	18.0592	18.0571	18.1931	18.1946	18.045	18.1772	18.2556	18.2295	18.0285	18.0964	18.1541	18.1634	18.0505	18.0556	18.0594	17.9975	17.9896	17.9919	18.0277	17.8407	17.8833	17.9651	17.7731	12	62.4	15.503	133	0	99.026	18.5152	18.5085	18.6382	18.6346	18.4605	18.515	18.5793
Q9FHG2	Q9FHG2	60S ribosomal protein L32-2	RPL32B	sp|Q9FHG2|RL322_ARATH 60S ribosomal protein L32-2 OS=Arabidopsis thaliana GN=RPL32B PE=2 SV=1	1	20.2869	20.2617	20.2977	20.2709	20.2375	20.1994	20.225	20.2625	20.1725	20.1268	20.2056	20.1867	20.1749	20.2214	20.2986	20.2404	20.055	20.0718	20.153	20.0755	19.9917	19.9825	20.018	20.0298	20.0033	19.9987	20.0049	19.8683	19.9098	19.9522	19.7476	12	62.4	15.475	133	0	122.12	20.3003	20.2681	20.2857	20.2516	20.2087	20.2054	20.2348
Q9FKK1	Q9FKK1			tr|Q9FKK1|Q9FKK1_ARATH Protein transport protein SEC61 subunit beta OS=Arabidopsis thaliana GN=At5g60460 PE=2 SV=1	1	15.0811	15.0231	15.0762	15.0903	15.1309	14.9729	15.106	15.111	15.249	15.2168	15.3371	15.3226	15.0805	15.1095	14.9806	14.9312	15.1636	15.1443	15.1188	14.792	14.6932	15.1317	14.9205	15.5639	15.6111	15.6061	15.4085	15.0987	14.8628	14.6203	14.6287	4	62.4	10.865	109	0	47.959	15.4943	15.4293	15.4639	15.4709	15.502	15.3787	15.5156
Q8LPJ4;Q9LID6	Q8LPJ4	ABC transporter E family member 2	ABCE2	sp|Q8LPJ4|AB2E_ARATH ABC transporter E family member 2 OS=Arabidopsis thaliana GN=ABCE2 PE=2 SV=1	2	20.2908	20.237	20.3385	20.3945	20.2266	20.1898	20.2682	20.3099	20.2777	20.4131	20.4324	20.4229	20.2549	20.3332	20.3107	20.2984	20.0535	20.2315	20.2925	20.3491	20.2517	20.2244	20.1439	20.306	20.3048	20.3671	20.3238	20.0706	20.0881	20.2554	20.1116	38	62.3	68.389	605	0	323.31	20.4053	20.3445	20.4276	20.4764	20.2989	20.2969	20.3791
P92947	P92947	Monodehydroascorbate reductase, chloroplastic		sp|P92947|MDAR5_ARATH Monodehydroascorbate reductase 5, mitochondrial OS=Arabidopsis thaliana GN=MDAR5 PE=1 SV=3	1	20.5363	20.4089	20.3911	20.4439	20.353	20.5515	20.4642	20.4949	20.1121	19.3635	19.424	19.379	20.4455	20.1429	20.1651	20.3528	20.6507	20.581	20.3875	20.5701	20.5525	20.544	20.7056	19.5424	19.5058	19.647	19.5562	20.6408	20.7558	20.6012	20.6526	29	62.3	53.301	493	0	323.31	20.5563	20.4218	20.3856	20.4312	20.3308	20.564	20.4806
Q93WJ8	Q93WJ8	Probable monodehydroascorbate reductase, cytoplasmic isoform 4		sp|Q93WJ8|MDAR2_ARATH Monodehydroascorbate reductase 2 OS=Arabidopsis thaliana GN=MDAR2 PE=2 SV=1	1	19.2719	19.3364	19.1496	19.2353	19.362	19.2941	19.1558	19.2873	18.8908	18.4355	18.4491	18.4364	19.2311	19.1343	18.9677	19.2235	19.2418	19.0265	18.822	19.4211	19.4955	19.3772	19.566	18.6511	18.6319	18.6358	18.6523	19.918	19.9933	19.8081	19.9873	24	62.3	47.479	435	0	323.31	19.5353	19.5928	19.3876	19.4662	19.5833	19.5502	19.4157
Q96533	Q96533	Alcohol dehydrogenase class-3	ADH2	sp|Q96533|ADHX_ARATH Alcohol dehydrogenase class-3 OS=Arabidopsis thaliana GN=ADH2 PE=1 SV=2	1	19.2407	19.2265	19.0858	19.1018	19.0218	19.0735	19.1277	19.0812	19.1135	18.4826	18.5078	18.5366	19.151	18.9595	18.883	19.1185	19.4032	19.184	18.9654	19.2452	19.2713	19.2567	19.4796	18.6741	18.5184	18.5969	18.5413	19.3744	19.5208	19.3993	19.4818	21	62.3	40.698	379	0	323.31	19.3535	19.3323	19.1731	19.182	19.0924	19.1788	19.2369
P56797	P56797	30S ribosomal protein S2, chloroplastic	rps2	sp|P56797|RR2_ARATH 30S ribosomal protein S2, chloroplastic OS=Arabidopsis thaliana GN=rps2 PE=3 SV=1	1	19.7629	19.6616	19.7787	19.819	19.6428	19.571	19.5134	19.7028	19.7193	19.5972	19.7487	19.5687	19.676	19.8161	19.7469	19.7262	19.7943	19.8192	19.8743	19.9375	19.8518	19.8002	19.7302	19.7305	19.675	19.6991	19.7567	19.7283	19.6922	19.906	19.8331	16	62.3	26.904	236	0	252.97	20.1894	20.0811	20.1797	20.2129	20.0272	19.9901	19.9363
Q9C7N4	Q9C7N4	GDSL esterase/lipase At1g29670		sp|Q9C7N4|GDL15_ARATH GDSL esterase/lipase At1g29670 OS=Arabidopsis thaliana GN=At1g29670 PE=2 SV=1	1	18.6644	18.5378	18.705	18.6802	18.4767	18.6491	18.6759	18.5958	18.7912	18.6095	18.6463	18.6037	18.8235	18.7383	18.7524	18.6379	18.8632	18.8989	19.0397	18.5597	18.5466	18.411	18.4846	18.9133	18.6774	18.8441	18.943	18.7936	18.7068	18.6327	18.7553	16	62.3	39.871	363	0	323.31	18.849	18.7153	18.8641	18.8321	18.6191	18.8262	18.8569
Q9C514	Q9C514	40S ribosomal protein S7-1	RPS7A	sp|Q9C514|RS71_ARATH 40S ribosomal protein S7-1 OS=Arabidopsis thaliana GN=RPS7A PE=2 SV=1	1	20.1582	20.2142	20.179	20.2534	19.9633	19.9201	20.0266	20.0486	20.0802	20.1102	20.23	20.1915	20.0921	20.1515	20.0973	20.1114	20.0446	20.0523	20.133	20.0363	19.9584	20.0363	20.0255	20.1024	20.0778	20.0937	20.0998	19.9266	19.9205	19.9214	19.8018	12	62.3	21.922	191	0	233.57	20.5204	20.5693	20.5158	20.583	20.2833	20.2749	20.3852
Q9LK72	Q9LK72	Lectin-like protein At3g16530		sp|Q9LK72|LECT5_ARATH Lectin-like protein At3g16530 OS=Arabidopsis thaliana GN=At3g16530 PE=1 SV=1	1	17.9104	17.8847	18.1405	18.0985	18.3353	18.1512	18.0393	18.2332	17.9754	18.1072	17.8913	17.9163	17.7884	17.89	18.3095	17.9939	17.916	18.009	18.0417	18.5428	18.4001	18.6119	18.3285	18.1373	18.1174	17.9645	18.0976	18.0576	18.2173	18.3504	18.01	11	62.3	30.509	276	0	210.17	18.3334	18.3006	18.5381	18.4889	18.7161	18.5667	18.4587
Q9SL09	Q9SL09		At2g05580	tr|Q9SL09|Q9SL09_ARATH Glycine-rich protein OS=Arabidopsis thaliana GN=At2g05580 PE=4 SV=1	1	14.3717	15.9368	14.6244	14.3084	15.3218	16.1267	16.2796	14.9935	15.3949	14.499	14.271	14.5223	16.2629	15.8917	15.0625	15.5275	16.6965	16.6336	16.7244	14.5654	14.726	15.1747	15.9968	12.6806	13.1985	13.0012	13.1193	12.5771	12.4454	12.5793	12.4152	9	62.3	26.007	302	0	43.293	14.348	15.906	14.5752	14.252	15.2558	16.0955	16.2523
Q9SUW2;Q9SU38	Q9SUW2	Adenine phosphoribosyltransferase 3	APT3	sp|Q9SUW2|APT3_ARATH Adenine phosphoribosyltransferase 3 OS=Arabidopsis thaliana GN=APT3 PE=1 SV=1	2	17.1339	17.2219	17.1787	17.3104	17.1912	17.2695	17.1607	17.384	17.0498	16.9503	17.0034	16.9141	17.3733	17.282	17.2716	17.323	17.2094	17.1213	17.1654	17.4539	17.495	17.499	17.5842	16.9818	17.0232	16.9863	16.9483	17.3005	17.4514	17.3157	17.3956	9	62.3	20.352	183	0	48.938	17.1052	17.1862	17.1246	17.2492	17.1204	17.2335	17.1285
Q9SCN8	Q9SCN8	Cell division control protein 48 homolog D	CDC48D	sp|Q9SCN8|CD48D_ARATH Cell division control protein 48 homolog D OS=Arabidopsis thaliana GN=CDC48D PE=1 SV=1	1	16.1207	16.1342	16.1397	16.2224	16.8865	17.0255	17.0113	16.7505	15.9842	15.7369	15.9692	15.8302	16.1071	16.1649	16.1122	16.1226	16.1428	16.1301	16.1092	16.3855	16.3295	16.4097	16.4184	15.9796	16.0645	16.0758	16.0738	16.1938	16.4137	16.4105	16.5331	43	62.2	90.339	815	0	24.56	17.0508	17.0573	17.0443	17.1199	17.7744	17.9482	17.9378
O23593	O23593		dl4795w	tr|O23593|O23593_ARATH AT4g17520/dl4795w OS=Arabidopsis thaliana GN=dl4795w PE=1 SV=1	1	20.0393	19.9158	19.9712	19.7832	20.0935	19.9619	20.158	20.0481	20.229	20.5881	20.6053	20.6429	19.761	19.8178	20.04	19.8922	19.6455	19.7152	19.974	19.8101	19.5246	19.7545	19.611	19.8401	20.0153	20.0865	19.8891	18.726	18.769	18.8483	18.7652	25	62.2	38.905	360	0	323.31	20.2194	20.0889	20.1259	19.9307	20.2314	20.1346	20.3345
Q9LVT8	Q9LVT8		At5g47210	tr|Q9LVT8|Q9LVT8_ARATH At5g47210 OS=Arabidopsis thaliana GN=At5g47210 PE=1 SV=1	1	20.0963	20.0641	20.1126	19.9433	20.1165	19.987	20.1975	20.0985	20.323	20.694	20.752	20.7689	19.9361	19.9875	20.1069	20.0415	19.5074	19.6141	19.8991	19.887	19.7167	19.8452	19.7435	19.9313	20.0157	20.0074	19.941	18.8901	18.974	18.9541	18.9991	25	62.2	37.999	357	0	323.31	20.1874	20.1482	20.1783	20.0018	20.1655	20.0706	20.285
P42643	P42643	14-3-3-like protein GF14 chi	GRF1	sp|P42643|14331_ARATH 14-3-3-like protein GF14 chi OS=Arabidopsis thaliana GN=GRF1 PE=1 SV=3	1	18.7948	18.723	18.6195	18.5021	18.6251	18.6677	18.8091	18.6507	18.2479	17.9543	18.0186	17.9907	18.6473	18.5397	18.5436	18.5649	18.6562	18.3905	18.2642	18.4829	18.5856	18.4182	18.5113	18.607	18.5608	18.545	18.5539	18.6692	18.5832	18.3962	18.4811	15	62.2	29.931	267	0	212.62	18.6836	18.6047	18.4829	18.3583	18.4717	18.5491	18.6943
Q8LA13	Q8LA13	DEAD-box ATP-dependent RNA helicase 11	RH11	sp|Q8LA13|RH11_ARATH DEAD-box ATP-dependent RNA helicase 11 OS=Arabidopsis thaliana GN=RH11 PE=1 SV=1	1	19.7827	19.6952	19.7488	19.7105	19.7277	19.5901	19.6769	19.7051	19.7657	19.8113	19.8589	19.8112	19.6857	19.6536	19.6901	19.634	19.6132	19.7002	19.7883	19.6313	19.5102	19.6412	19.578	19.5359	19.5482	19.6009	19.6207	19.4645	19.5098	19.5368	19.515	33	62.1	66.025	612	0	323.31	19.7271	19.6326	19.6678	19.6224	19.63	19.5271	19.6178
Q9XFS9	Q9XFS9	1-deoxy-D-xylulose 5-phosphate reductoisomerase, chloroplastic	DXR	sp|Q9XFS9|DXR_ARATH 1-deoxy-D-xylulose 5-phosphate reductoisomerase, chloroplastic OS=Arabidopsis thaliana GN=DXR PE=2 SV=2	1	18.6784	18.5383	18.5774	18.6019	18.4569	18.5253	18.4039	18.5368	18.5301	18.101	18.1596	18.1703	18.6517	18.5538	18.527	18.5708	18.8725	18.7328	18.6233	18.6258	18.6464	18.6525	18.6753	18.0376	17.9858	17.9932	18.0022	18.8938	18.9156	18.8493	18.8687	23	62.1	51.963	477	0	226.32	18.5707	18.4237	18.4443	18.4617	18.3071	18.4102	18.2928
Q8RYC3	Q8RYC3		At2g33845	tr|Q8RYC3|Q8RYC3_ARATH Expressed protein OS=Arabidopsis thaliana GN=At2g33845 PE=2 SV=1	1	17.3937	17.4427	17.3934	17.618	17.3288	17.2341	17.3263	17.416	17.4185	17.5202	17.4864	17.5109	17.4303	17.3568	17.3686	17.4274	17.3026	17.3735	17.4831	17.2914	17.1494	17.3275	17.2988	17.3908	17.3707	17.4401	17.4886	17.0591	17.1635	17.2372	17.1073	10	62.1	20.122	182	0	99.178	17.3272	17.3692	17.3014	17.5189	17.2202	17.1601	17.2563
Q9SJ44	Q9SJ44	Ubiquitin-conjugating enzyme E2 variant 1C	UEV1C	sp|Q9SJ44|UEV1C_ARATH Ubiquitin-conjugating enzyme E2 variant 1C OS=Arabidopsis thaliana GN=UEV1C PE=1 SV=1	1	17.2003	17.2197	17.1731	17.0315	17.2269	17.29	17.2108	17.2898	17.0688	16.9454	16.9561	16.8951	17.1457	17.0619	17.1906	17.1824	17.0115	17.0033	16.9035	17.2783	17.3714	17.0863	17.1399	16.7769	16.7004	16.7156	16.7677	17.0273	17.1017	17.2474	17.1013	10	62.1	16.481	145	0	109.3	16.9197	16.9321	16.8671	16.7184	16.9042	17.0021	16.9267
O04922	O04922	Probable glutathione peroxidase 2	GPX2	sp|O04922|GPX2_ARATH Probable glutathione peroxidase 2 OS=Arabidopsis thaliana GN=GPX2 PE=1 SV=1	1	18.159	18.0717	17.9686	17.8791	18.2881	18.2273	18.1887	18.1171	18.0103	17.9933	17.9391	18.111	17.9938	17.9812	18.2941	18.0199	17.9746	17.8699	17.733	18.0002	18.129	17.9096	17.8522	18.0307	17.9507	17.946	17.9598	18.0981	18.0323	18.0417	17.9977	9	62.1	18.944	169	0	69.476	17.9775	17.8832	17.7616	17.665	18.0643	18.0384	18.0036
Q8L8S0	Q8L8S0		At5g57860	tr|Q8L8S0|Q8L8S0_ARATH At5g57860 OS=Arabidopsis thaliana GN=At5g57860 PE=2 SV=1	1	14.9037	14.8863	14.8084	14.7291	14.7639	14.7863	14.6986	14.8214	14.8604	14.8032	14.7719	14.8417	14.8632	14.8616	14.8005	14.788	14.7461	14.8575	14.8546	14.8251	14.831	14.8489	14.8767	14.8783	14.8442	14.8298	14.917	14.8595	14.8805	14.9534	14.9089	4	62.1	10.899	95	0	17.965	14.5548	14.5304	14.434	14.3476	14.3729	14.43	14.3461
Q8VZB9	Q8VZB9	60S ribosomal protein L10a-1	RPL10AA	sp|Q8VZB9|R10A1_ARATH 60S ribosomal protein L10a-1 OS=Arabidopsis thaliana GN=RPL10AA PE=1 SV=1	1	20.0109	19.9433	20.043	20.0277	19.9315	19.8724	19.9725	20.0217	19.9298	19.9278	19.9654	19.9616	19.8355	19.9545	20.0532	19.9862	19.8329	19.8841	19.9507	19.9146	19.7807	19.8017	19.7814	19.8001	19.831	19.793	19.8527	19.6659	19.6608	19.7431	19.5229	15	62	24.469	216	0	147.48	20.2418	20.1672	20.2484	20.226	20.1202	20.0958	20.1998
P49201;Q9SF35	P49201;Q9SF35	40S ribosomal protein S23-2;40S ribosomal protein S23-1	RPS23B;RPS23A	sp|P49201|RS232_ARATH 40S ribosomal protein S23-2 OS=Arabidopsis thaliana GN=RPS23B PE=2 SV=2;sp|Q9SF35|RS231_ARATH 40S ribosomal protein S23-1 OS=Arabidopsis thaliana GN=RPS23A PE=2 SV=2	2	19.8172	19.7013	19.7095	19.6829	19.5645	19.5114	19.6447	19.6736	19.5079	19.4874	19.5661	19.5561	19.5912	19.6348	19.6172	19.5714	19.3448	19.4823	19.5556	19.5828	19.4851	19.4351	19.4342	19.5153	19.5378	19.5191	19.6458	19.2036	19.4531	19.4738	19.2641	14	62	15.735	142	0	291.44	19.6035	19.4806	19.4703	19.4366	19.3086	19.2903	19.4274
Q9SN68	Q9SN68	Ras-related protein RABF2b	RABF2B	sp|Q9SN68|RAF2B_ARATH Ras-related protein RABF2b OS=Arabidopsis thaliana GN=RABF2B PE=1 SV=1	1	16.429	16.4887	16.3668	16.3572	16.4855	16.3757	16.4278	16.3984	16.4242	16.4614	16.3434	16.3877	16.4061	16.3727	16.266	16.3415	16.4334	16.3674	16.3756	16.4471	16.4672	16.4188	16.3749	16.6758	16.7705	16.78	16.6939	16.3651	16.2337	16.4245	16.4383	9	62	21.873	200	0	66.566	16.5157	16.5684	16.428	16.4113	16.53	16.4549	16.5109
Q9SSK5	Q9SSK5	MLP-like protein 43	MLP43	sp|Q9SSK5|MLP43_ARATH MLP-like protein 43 OS=Arabidopsis thaliana GN=MLP43 PE=1 SV=1	1	16.8125	17.0019	16.7937	16.9556	16.5187	16.4761	16.6237	16.6608	16.4706	16.1544	16.1929	16.1461	17.1091	16.9615	16.6152	16.966	17.0546	16.7408	16.6922	16.7207	16.8717	16.9819	16.8507	16.8904	16.7215	16.7135	16.9691	17.3138	17.4303	16.8266	17.2695	9	62	17.889	158	0	103.59	16.8389	17.0213	16.7946	16.9493	16.5029	16.495	16.6465
P22953	P22953	Probable mediator of RNA polymerase II transcription subunit 37e	MED37E	sp|P22953|MD37E_ARATH Probable mediator of RNA polymerase II transcription subunit 37e OS=Arabidopsis thaliana GN=MED37E PE=1 SV=3	1	21.0888	21.1734	21.0277	21	21.6402	21.6998	21.5756	21.4602	21.1648	20.9723	21.0068	20.9819	21.0745	21.0271	21.0035	21.0178	21.2885	21.2467	21.2077	21.0472	21.04	20.998	21.0186	21.2097	21.2818	21.2845	21.1221	21.099	21.0453	21.0291	20.9941	41	61.9	71.357	651	0	323.31	21.0991	21.1766	21.0126	20.9776	21.6083	21.7027	21.5823
Q9LNU4	Q9LNU4	26S proteasome non-ATPase regulatory subunit 3 homolog A	RPN3A	sp|Q9LNU4|PSD3A_ARATH 26S proteasome non-ATPase regulatory subunit 3 homolog A OS=Arabidopsis thaliana GN=RPN3A PE=1 SV=3	1	20.6449	20.644	20.6072	20.5683	20.6426	20.6133	20.7318	20.6412	20.3956	20.3094	20.4293	20.3845	20.5368	20.5925	20.5745	20.632	20.3047	20.3349	20.3155	20.5371	20.3921	20.3962	20.4731	20.3764	20.4123	20.4414	20.376	20.3209	20.3064	20.3988	20.3219	29	61.9	55.582	488	0	323.31	20.2635	20.2556	20.2004	20.1542	20.219	20.2245	20.3468
Q8LGI2	Q8LGI2	Probable mitochondrial saccharopine dehydrogenase-like oxidoreductase At5g39410		sp|Q8LGI2|SCPDL_ARATH Probable mitochondrial saccharopine dehydrogenase-like oxidoreductase At5g39410 OS=Arabidopsis thaliana GN=At5g39410 PE=1 SV=2	1	18.3915	18.5027	18.4657	18.3999	18.5141	18.4683	18.401	18.3627	18.6953	18.8899	18.7799	18.8731	18.4865	18.568	18.5324	18.4552	18.5428	18.4818	18.4292	18.3143	18.4392	18.3735	18.3379	18.9889	18.9985	18.9628	18.8867	18.6127	18.364	18.4363	18.5752	23	61.9	49.68	454	0	323.31	18.3186	18.4228	18.3675	18.2944	18.3991	18.3881	18.3246
Q9FG67	Q9FG67	Methylthioalkylmalate synthase 1, chloroplastic	MAM1	sp|Q9FG67|MAM1_ARATH Methylthioalkylmalate synthase 1, chloroplastic OS=Arabidopsis thaliana GN=MAM1 PE=1 SV=1	1	18.6201	18.7421	18.714	18.7484	18.6429	18.5375	18.546	18.5767	18.7798	18.818	18.7973	18.8718	18.6462	18.7454	18.774	18.8268	18.9129	18.7013	18.5347	18.8242	18.7113	19.0633	18.9426	18.8403	18.9046	18.855	18.7528	18.7003	18.7388	18.8337	18.7381	23	61.9	55.124	506	0	323.31	18.5542	18.6692	18.6226	18.6499	18.5348	18.4642	18.4765
Q9C774	Q9C774	26S proteasome non-ATPase regulatory subunit 7 homolog B	RPN8B	sp|Q9C774|PSD7B_ARATH 26S proteasome non-ATPase regulatory subunit 7 homolog B OS=Arabidopsis thaliana GN=RPN8B PE=1 SV=1	1	16.5307	16.5652	16.584	16.5888	16.599	16.6033	16.6206	16.591	16.4766	16.4235	16.3662	16.4498	16.4961	16.4899	16.4599	16.5244	16.4245	16.4132	16.4117	16.7074	16.6597	16.6625	16.72	16.5109	16.5156	16.5874	16.4822	16.4783	16.5201	16.624	16.6901	15	61.9	35.085	310	0	73.226	16.519	16.5465	16.5469	16.5445	16.5451	16.5843	16.6053
Q43387	Q43387	Peroxidase 71	PER71	sp|Q43387|PER71_ARATH Peroxidase 71 OS=Arabidopsis thaliana GN=PER71 PE=1 SV=1	1	18.0431	17.9401	18.0004	17.798	18.2658	18.0878	18.2088	18.048	18.2446	18.5249	18.3334	18.226	17.8161	17.7417	18.1102	17.9258	17.4882	17.6572	17.4948	18.0281	17.7364	17.5728	17.5204	18.2579	18.0437	18.7205	18.1043	17.53	17.5795	17.5666	17.5395	14	61.9	34.889	328	0	271.73	18.148	18.038	18.0799	17.8703	18.3285	18.1853	18.3102
Q8LDC9	Q8LDC9			tr|Q8LDC9|Q8LDC9_ARATH GroES-like protein OS=Arabidopsis thaliana GN=At1g23100 PE=2 SV=1	1	16.2137	15.757	15.8289	15.6213	16.088	16.0575	16.2476	15.9962	15.8958	16.0505	16.0564	16.176	15.7666	15.7263	15.7418	15.8016	15.6305	15.5803	15.5326	15.7719	15.7549	15.7944	15.778	15.6461	15.8056	15.9369	15.6953	15.6163	15.6948	15.4259	15.5423	5	61.9	10.546	97	0	18.242	16.246	15.7823	15.8358	15.6209	16.0782	16.0823	16.2763
O23264	O23264	Selenium-binding protein 1	SBP1	sp|O23264|SEBP1_ARATH Selenium-binding protein 1 OS=Arabidopsis thaliana GN=SBP1 PE=1 SV=1	1	17.8713	18.097	17.954	18.0478	17.8538	17.9071	17.8649	17.8649	17.7914	17.5777	17.6178	17.6249	17.9838	17.948	17.8056	17.9742	18.0634	17.9485	17.8337	17.9591	18.1091	17.9701	18.1355	17.708	17.6941	17.7343	17.7157	18.0376	18.088	18.0536	18.1389	22	61.8	54.056	490	0	323.31	17.8416	18.0603	17.8989	17.9854	17.7819	17.87	17.8316
P0CJ47;P0CJ46	P0CJ47;P0CJ46	Actin-3;Actin-1	ACT3;ACT1	sp|P0CJ47|ACT3_ARATH Actin-3 OS=Arabidopsis thaliana GN=ACT3 PE=1 SV=1;sp|P0CJ46|ACT1_ARATH Actin-1 OS=Arabidopsis thaliana GN=ACT1 PE=1 SV=1	2	17.8744	18.0726	18.0312	18.2038	17.9927	17.9813	17.9032	18.067	17.8633	17.539	17.6563	17.5785	18.2984	18.252	18.0553	18.2185	18.0605	17.9196	17.8639	18.3408	18.3045	18.4137	18.4527	17.7071	17.6427	17.7327	17.7086	18.0727	18.3542	18.2995	18.3488	22	61.8	41.797	377	0	111.86	18.0432	18.2344	18.1746	18.34	18.1193	18.1427	18.0684
Q9ZUT9	Q9ZUT9	40S ribosomal protein S5-1	RPS5A	sp|Q9ZUT9|RS51_ARATH 40S ribosomal protein S5-1 OS=Arabidopsis thaliana GN=RPS5A PE=1 SV=1	1	20.3629	20.3339	20.3471	20.331	20.2079	20.2344	20.2978	20.2883	20.1952	20.1869	20.2422	20.2147	20.2103	20.2647	20.3246	20.246	20.1233	20.1638	20.2497	20.2264	20.1214	20.1207	20.1078	20.1477	20.1957	20.1959	20.2595	20.0094	20.0122	20.0851	19.9538	16	61.8	22.99	207	0	323.31	20.1862	20.1502	20.1449	20.1216	19.989	20.0502	20.1174
Q9XI05	Q9XI05	Proteasome subunit beta type-3-A	PBC1	sp|Q9XI05|PSB3A_ARATH Proteasome subunit beta type-3-A OS=Arabidopsis thaliana GN=PBC1 PE=1 SV=2	1	18.2124	18.0625	17.9896	17.9122	18.2309	18.2321	18.4768	18.1968	17.8701	17.8145	17.8565	17.8516	17.9495	17.8744	17.9736	18.0673	17.8681	17.9333	17.8757	18.1381	18.0657	18.1084	18.0929	18.115	18.235	18.2228	18.1484	18.0018	17.8615	17.863	18.0219	12	61.8	22.798	204	0	234.11	18.5102	18.3533	18.2619	18.1774	18.4865	18.5225	18.771
O82628	O82628	V-type proton ATPase subunit G1	VHA-G1	sp|O82628|VATG1_ARATH V-type proton ATPase subunit G1 OS=Arabidopsis thaliana GN=VHA-G1 PE=2 SV=1	1	18.4164	18.2587	18.2262	18.3758	18.3375	18.4994	18.3842	18.3437	18.4534	18.3937	18.445	18.5249	18.3919	18.3514	18.3121	18.4096	18.4726	18.4509	18.2611	18.3881	18.4017	18.3561	18.4564	18.8786	18.8921	18.9898	18.9138	18.5246	18.61	18.5602	18.5806	9	61.8	12.397	110	0	323.31	18.7914	18.6266	18.5757	18.7181	18.6703	18.867	18.7556
Q9SIV2;Q9SYE4	Q9SIV2	26S proteasome non-ATPase regulatory subunit 2 homolog A	RPN1A	sp|Q9SIV2|PSD2A_ARATH 26S proteasome non-ATPase regulatory subunit 2 homolog A OS=Arabidopsis thaliana GN=RPN1A PE=1 SV=2	2	20.8067	20.8099	20.7842	20.7671	20.7939	20.7373	20.8503	20.7837	20.4895	20.3932	20.4829	20.4048	20.6575	20.6881	20.6357	20.7345	20.612	20.713	20.6723	20.8524	20.7419	20.8096	20.8695	20.6383	20.6932	20.7365	20.652	20.6168	20.6944	20.7843	20.7477	47	61.7	98.143	891	0	323.31	20.6878	20.684	20.6399	20.6157	20.6329	20.611	20.7279
Q9LK34	Q9LK34	Uridine kinase-like protein 2, chloroplastic;Uridine kinase;Putative uracil phosphoribosyltransferase	UKL2	sp|Q9LK34|UKL2_ARATH Uridine kinase-like protein 2, chloroplastic OS=Arabidopsis thaliana GN=UKL2 PE=2 SV=1	1	17.3397	17.5704	17.5566	17.7091	17.5696	17.4858	17.4106	17.5167	17.6378	17.7254	17.7333	17.6805	17.5452	17.7208	17.5937	17.6396	17.5257	17.6947	17.747	17.7368	17.7	17.7067	17.6836	17.7746	17.7685	17.8728	17.7046	17.5265	17.6102	17.8076	17.6764	26	61.7	54.209	483	0	154.65	17.2055	17.4291	17.397	17.5423	17.3932	17.3441	17.2728
Q9SQI8	Q9SQI8	Dihydrolipoyllysine-residue acetyltransferase component 4 of pyruvate dehydrogenase complex, chloroplastic	LTA2	sp|Q9SQI8|ODP24_ARATH Dihydrolipoyllysine-residue acetyltransferase component 4 of pyruvate dehydrogenase complex, chloroplastic OS=Arabidopsis thaliana GN=LTA2 PE=2 SV=1	1	20.141	20.1771	20.2494	20.5027	20.2481	20.2123	20.1867	20.2634	20.4764	20.668	20.7569	20.6969	20.3852	20.5271	20.3296	20.4011	20.2673	20.3852	20.575	20.5388	20.4713	20.6335	20.5076	20.6179	20.6122	20.5976	20.7498	20.3943	20.6472	20.6989	20.6067	22	61.7	50.08	480	0	323.31	20.21	20.2391	20.293	20.5391	20.2749	20.2739	20.2521
P48578	P48578	Serine/threonine-protein phosphatase PP2A-3 catalytic subunit	PP2A3	sp|P48578|PP2A3_ARATH Serine/threonine-protein phosphatase PP2A-3 catalytic subunit OS=Arabidopsis thaliana GN=PP2A3 PE=2 SV=1	1	18.9051	18.9018	18.9442	19.1701	18.8329	19.0686	18.8776	19.0533	18.7194	18.3212	18.3654	18.1899	19.2757	19.1557	18.9647	19.0691	19.0344	18.9704	18.7958	19.1057	19.1644	19.0611	19.1862	18.6512	18.61	18.7379	18.7073	19.2	19.1678	19.2681	19.1932	15	61.7	35.767	313	0	323.31	19.4357	19.4253	19.4494	19.668	19.3213	19.5917	19.4046
Q9LZ17	Q9LZ17	40S ribosomal protein S17-4	RPS17D	sp|Q9LZ17|RS174_ARATH 40S ribosomal protein S17-4 OS=Arabidopsis thaliana GN=RPS17D PE=2 SV=3	1	14.9458	15.0019	15.0795	14.8922	15.2192	15.0681	15.1315	14.969	14.9385	14.8719	14.861	14.9978	15.0951	15.0642	15.0928	15.0191	15.0915	14.9456	14.7794	14.8773	14.8391	14.8989	14.9469	14.9043	14.7844	14.7649	14.7677	14.8089	14.8297	14.7225	14.7729	10	61.7	16.018	141	0	43.312	14.872	14.9212	14.9804	14.7859	15.1033	14.987	15.0542
P0DH96;P0DH95	P0DH96;P0DH95	Calmodulin-4;Calmodulin-1	CAM4;CAM1	sp|P0DH96|CALM4_ARATH Calmodulin-4 OS=Arabidopsis thaliana GN=CAM4 PE=1 SV=1;sp|P0DH95|CALM1_ARATH Calmodulin-1 OS=Arabidopsis thaliana GN=CAM1 PE=2 SV=1	2	16.2105	16.1602	16.3349	16.3075	16.2884	16.2367	16.3292	16.3258	16.04	16.0349	16.0162	16.06	16.3113	16.4327	16.4441	16.3785	16.3401	16.2949	16.2634	16.6639	16.7576	16.6257	16.7092	16.1858	16.2526	16.1807	16.265	16.7414	16.646	16.6528	16.7812	9	61.7	16.862	149	0	30.064	15.6715	15.6141	15.7705	15.7358	15.7073	15.6903	15.7866
Q9LPG6	Q9LPG6	Trifunctional UDP-glucose 4,6-dehydratase/UDP-4-keto-6-deoxy-D-glucose 3,5-epimerase/UDP-4-keto-L-rhamnose-reductase RHM2;UDP-glucose 4,6-dehydratase;UDP-4-keto-6-deoxy-D-glucose 3,5-epimerase/UDP-4-keto-L-rhamnose 4-keto-reductase	RHM2	sp|Q9LPG6|RHM2_ARATH Trifunctional UDP-glucose 4,6-dehydratase/UDP-4-keto-6-deoxy-D-glucose 3,5-epimerase/UDP-4-keto-L-rhamnose-reductase RHM2 OS=Arabidopsis thaliana GN=RHM2 PE=1 SV=1	1	20.1504	20.1873	20.2208	20.2462	20.1727	20.2303	20.1613	20.2315	19.7406	19.4752	19.5456	19.5209	20.2256	20.254	20.1532	20.2285	20.0546	20.0396	20.0609	20.4451	20.4799	20.3401	20.4452	20.0301	19.9563	20.0003	20.0176	20.4121	20.4698	20.5081	20.5374	38	61.6	75.225	667	0	323.31	20.1755	20.2054	20.2205	20.2386	20.1556	20.2479	20.1828
Q9SH69	Q9SH69	6-phosphogluconate dehydrogenase, decarboxylating 1, chloroplastic		sp|Q9SH69|6PGD1_ARATH 6-phosphogluconate dehydrogenase, decarboxylating 1, chloroplastic OS=Arabidopsis thaliana GN=At1g64190 PE=1 SV=1	1	17.9976	18.1216	18.0699	18.2001	17.7857	17.927	17.7802	17.9648	17.6565	17.1257	17.2051	17.28	18.1167	17.9961	18.0088	18.0752	18.3941	18.3846	18.2144	18.2215	18.3118	18.1859	18.3327	17.6444	17.5253	17.5808	17.6355	18.2632	18.527	18.5643	18.4375	26	61.6	53.377	487	0	147.34	18.5547	18.6717	18.6015	18.7246	18.3005	18.4767	18.3337
Q9LMK0	Q9LMK0	60S ribosomal protein L35a-1	RPL35AA	sp|Q9LMK0|R35A1_ARATH 60S ribosomal protein L35a-1 OS=Arabidopsis thaliana GN=RPL35AA PE=3 SV=1	1	17.596	17.4473	17.51	17.4525	17.462	17.3766	17.4685	17.4523	17.3118	17.2009	17.3697	17.2772	17.324	17.4259	17.507	17.3906	17.1504	17.168	17.2093	17.231	17.0922	17.1165	17.1349	17.1386	17.0872	17.0908	17.1103	17.0457	16.9805	17.0183	16.8727	7	61.6	12.848	112	0	65.803	17.2517	17.096	17.1403	17.0756	17.0756	17.0249	17.1206
Q9CA67	Q9CA67	Geranylgeranyl diphosphate reductase, chloroplastic	CHLP	sp|Q9CA67|CHLP_ARATH Geranylgeranyl diphosphate reductase, chloroplastic OS=Arabidopsis thaliana GN=CHLP PE=1 SV=1	1	19.4839	19.6281	19.6413	19.7795	19.5422	19.483	19.4105	19.4427	19.9366	19.9871	19.7947	19.9301	19.8252	19.8327	19.7224	19.7452	20.0999	20.0226	19.975	19.579	19.8624	19.8366	19.7043	20.0045	20.0258	19.7251	19.7497	19.9365	19.8736	20.0089	19.9351	27	61.5	51.837	467	0	323.31	19.5268	19.6639	19.6587	19.7897	19.5429	19.5185	19.4498
Q9M2E0	Q9M2E0	DEAD-box ATP-dependent RNA helicase 12	RH12	sp|Q9M2E0|RH12_ARATH DEAD-box ATP-dependent RNA helicase 12 OS=Arabidopsis thaliana GN=RH12 PE=2 SV=1	1	18.8888	18.7833	18.8432	18.7465	18.6745	18.6204	18.6778	18.7316	18.749	18.7246	18.7998	18.7316	18.6776	18.6157	18.7601	18.7615	18.6513	18.7449	18.8204	18.7263	18.578	18.6742	18.6719	18.4723	18.5115	18.6149	18.5639	18.4771	18.4711	18.537	18.5104	22	61.4	56.774	498	0	323.31	19.2375	19.1249	19.1665	19.0625	18.981	18.9617	19.0229
Q9FHW7	Q9FHW7	SKP1-like protein 1B	SKP1B	sp|Q9FHW7|SKP1B_ARATH SKP1-like protein 1B OS=Arabidopsis thaliana GN=SKP1B PE=1 SV=1	1	18.1426	18.1447	18.2378	18.275	18.0367	17.995	18.1261	18.1334	18.0899	18.012	18.1153	18.0309	18.1128	18.1931	18.2312	18.2607	18.1493	18.277	18.2698	18.3131	18.2872	18.292	18.314	18.2668	18.2468	18.2129	18.306	18.2394	18.3108	18.2993	18.2424	10	61.4	19.097	171	0	186.53	18.1172	18.1123	18.187	18.217	17.9692	17.9622	18.0971
Q9SJ36	Q9SJ36	40S ribosomal protein S17-2	RPS17B	sp|Q9SJ36|RS172_ARATH 40S ribosomal protein S17-2 OS=Arabidopsis thaliana GN=RPS17B PE=2 SV=3	1	15.9475	15.9603	15.9738	15.9212	15.9691	16.0033	15.9727	15.9981	15.8508	15.9726	15.9466	16.0466	15.8327	15.9057	16.0164	15.8913	15.9948	15.9551	16.0524	16.0223	15.9861	16.032	15.966	16.0026	15.9819	15.9023	15.9824	16.0066	16.0085	15.9371	15.9638	10	61.4	15.951	140	0	27.91	15.598	15.6039	15.5989	15.5392	15.5775	15.6465	15.6197
P38421	P38421	DNA-directed RNA polymerase II subunit 7	NRPB7	sp|P38421|NRPB7_ARATH DNA-directed RNA polymerase II subunit 7 OS=Arabidopsis thaliana GN=NRPB7 PE=1 SV=1	1	16.5746	16.477	16.7059	16.553	16.54	16.5885	16.4707	16.4852	16.371	16.1715	16.2309	16.1322	16.5118	16.3944	16.4253	16.5759	16.4446	16.5639	16.542	16.5769	16.5204	16.5857	16.5885	16.3032	16.2525	16.3904	16.353	16.4475	16.3929	16.4219	16.4836	8	61.4	19.461	176	0	29.905	16.4112	16.3066	16.5171	16.357	16.3344	16.4177	16.3037
Q9FWA3	Q9FWA3	6-phosphogluconate dehydrogenase, decarboxylating 3		sp|Q9FWA3|6GPD3_ARATH 6-phosphogluconate dehydrogenase, decarboxylating 3 OS=Arabidopsis thaliana GN=At3g02360 PE=2 SV=1	1	19.7066	19.6831	19.7589	19.6992	19.7344	19.6624	19.6053	19.7027	19.5295	19.5006	19.5688	19.5958	19.6299	19.6089	19.6949	19.6536	19.696	19.6351	19.5407	19.6662	19.7164	19.618	19.7031	19.2475	19.209	19.294	19.2937	19.6919	19.6356	19.701	19.6506	26	61.3	53.577	486	0	323.31	19.6111	19.5806	19.638	19.5712	19.5968	19.5595	19.5062
O23515;Q8VYF1	O23515;Q8VYF1	60S ribosomal protein L15-1;60S ribosomal protein L15-2	RPL15A;RPL15B	sp|O23515|RL151_ARATH 60S ribosomal protein L15-1 OS=Arabidopsis thaliana GN=RPL15A PE=2 SV=1;sp|Q8VYF1|RL152_ARATH 60S ribosomal protein L15-2 OS=Arabidopsis thaliana GN=RPL15B PE=2 SV=1	2	20.6135	20.596	20.5773	20.5673	20.4634	20.4496	20.5198	20.5397	20.4058	20.3702	20.4802	20.4592	20.4264	20.4735	20.5175	20.4267	20.304	20.3596	20.4104	20.3849	20.3116	20.2828	20.3098	20.2709	20.2577	20.2728	20.3144	20.147	20.1335	20.2567	20.0587	19	61.3	24.239	204	0	223.63	20.4177	20.3932	20.3561	20.3389	20.2254	20.2464	20.3205
Q9M1P5;Q6ID97;Q9LYJ3;Q9LQC8;P0DH91	Q9M1P5;Q6ID97;Q9LYJ3;Q9LQC8;P0DH91	ADP-ribosylation factor 2-A;ADP-ribosylation factor 2-B	T17J13.250;ARFA1F;T15N1_160;ARF2-A;ARF2-B	tr|Q9M1P5|Q9M1P5_ARATH ADP-ribosylation factor A1E OS=Arabidopsis thaliana GN=T17J13.250 PE=2 SV=1;tr|Q6ID97|Q6ID97_ARATH ADP-ribosylation factor A1F OS=Arabidopsis thaliana GN=ARFA1F PE=2 SV=1;tr|Q9LYJ3|Q9LYJ3_ARATH ADP-ribosylation factor A1B OS=Arabidop	5	19.0634	19.1396	19.0349	18.8854	19.2906	19.1947	19.0164	19.032	18.8158	18.8206	18.8126	18.7192	19.0752	18.9787	19.0691	19.0015	18.9537	18.8048	18.6966	18.9043	18.9999	18.831	18.804	19.0403	19.0809	19.0309	18.9891	19.0534	18.6342	18.7428	18.9067	10	61.3	20.607	181	0	263.03	18.9965	19.0657	18.9426	18.7859	19.1816	19.1204	18.946
Q9C522	Q9C522	ATP-citrate synthase beta chain protein 1	ACLB-1	sp|Q9C522|ACLB1_ARATH ATP-citrate synthase beta chain protein 1 OS=Arabidopsis thaliana GN=ACLB-1 PE=2 SV=1	1	21.0334	21.1043	21.1602	21.2829	20.8755	20.7203	20.7994	20.9491	21.143	21.1478	21.2539	21.1551	21.1618	21.2396	21.1372	21.1118	20.9504	21.015	21.1587	21.0885	20.9734	21.1355	21.0887	21.1155	21.0619	21.1084	21.1651	20.9007	21.0151	20.838	20.9178	34	61.2	65.813	608	0	323.31	21.0947	21.1586	21.1961	21.3116	20.8946	20.7742	20.8571
Q9FGX1	Q9FGX1	ATP-citrate synthase beta chain protein 2	ACLB-2	sp|Q9FGX1|ACLB2_ARATH ATP-citrate synthase beta chain protein 2 OS=Arabidopsis thaliana GN=ACLB-2 PE=1 SV=1	1	19.5592	19.6205	19.7107	19.8479	19.4585	19.422	19.4586	19.5287	19.6791	19.7007	19.8116	19.7064	19.7301	19.7806	19.6791	19.6776	19.6353	19.7274	19.8398	19.7024	19.6847	19.7854	19.7911	19.7192	19.6879	19.7495	19.8181	19.5932	19.7054	19.5848	19.7259	34	61.2	65.827	608	0	229.01	19.8082	19.8624	19.9342	20.0642	19.6652	19.6635	19.7039
Q9LF33;Q9MAB5	Q9LF33	UDP-glucose 6-dehydrogenase 3	UGD3	sp|Q9LF33|UGDH3_ARATH UDP-glucose 6-dehydrogenase 3 OS=Arabidopsis thaliana GN=UGD3 PE=1 SV=1	2	17.8482	17.7026	17.636	17.4386	17.972	18.0516	18.1163	17.8948	17.5408	17.5286	17.509	17.5195	17.6525	17.5991	17.721	17.7188	17.9558	17.7855	17.6277	17.7487	17.6852	17.5373	17.6717	17.5845	17.6192	17.5936	17.566	18.0759	18.0243	17.8423	18.0475	24	61.2	53.117	480	0	115.12	17.7434	17.5908	17.5058	17.3012	17.825	17.9393	18.0079
P93033;Q9FI53	P93033;Q9FI53	Fumarate hydratase 1, mitochondrial;Fumarate hydratase 2, chloroplastic	FUM1;FUM2	sp|P93033|FUM1_ARATH Fumarate hydratase 1, mitochondrial OS=Arabidopsis thaliana GN=FUM1 PE=2 SV=2;sp|Q9FI53|FUM2_ARATH Fumarate hydratase 2, chloroplastic OS=Arabidopsis thaliana GN=FUM2 PE=2 SV=1	2	18.7813	18.843	18.7642	18.5947	18.8384	18.8201	18.8047	18.8354	18.4675	18.4865	18.4618	18.5412	18.7622	18.6647	18.8691	18.7656	18.819	18.67	18.5848	18.7943	18.8912	18.6248	18.767	18.557	18.4989	18.5301	18.5068	18.893	18.7771	18.6891	18.8186	21	61.2	52.999	492	0	323.31	18.7275	18.7822	18.685	18.5082	18.7424	18.7589	18.7473
Q9LRX8	Q9LRX8	60S ribosomal protein L13a-2	RPL13AB	sp|Q9LRX8|R13A2_ARATH 60S ribosomal protein L13a-2 OS=Arabidopsis thaliana GN=RPL13AB PE=1 SV=1	1	21.1746	21.1129	21.1662	21.1226	21.0567	21.0423	21.1188	21.1738	20.994	20.9591	21.0628	21.0484	20.9959	21.0609	21.0882	21.0986	20.8901	20.8555	20.8878	20.9293	20.8044	20.7644	20.754	20.772	20.7955	20.7655	20.7815	20.7042	20.6343	20.7542	20.5455	20	61.2	23.459	206	0	173.27	21.4038	21.3351	21.37	21.3192	21.2438	21.2641	21.3445
Q9SFU1	Q9SFU1	60S ribosomal protein L13a-1	RPL13AA	sp|Q9SFU1|R13A1_ARATH 60S ribosomal protein L13a-1 OS=Arabidopsis thaliana GN=RPL13AA PE=2 SV=1	1	20.0652	20.015	20.0778	20.0749	19.9626	19.9256	19.9456	20.0041	19.8973	19.8208	19.9652	19.938	19.8437	19.9599	20.0339	19.9924	19.8057	19.8037	19.8602	19.8506	19.7682	19.7557	19.7374	19.6979	19.7346	19.7431	19.7657	19.6268	19.6485	19.7252	19.563	19	61.2	23.466	206	0	58.431	20.327	20.2698	20.3142	20.3041	20.1822	20.18	20.2038
Q9LEV3	Q9LEV3	CBS domain-containing protein CBSX3, mitochondrial	CBSX3	sp|Q9LEV3|CBSX3_ARATH CBS domain-containing protein CBSX3, mitochondrial OS=Arabidopsis thaliana GN=CBSX3 PE=1 SV=1	1	19.0271	19.1611	19.1512	19.0672	19.515	19.6241	19.6568	19.5418	18.7334	18.654	18.8243	18.6391	19.2831	19.1588	19.3406	19.3684	18.9408	18.4442	18.4066	19.0352	19.4115	18.9565	19.2445	18.1856	18.1254	18.2079	18.2647	19.2706	19.2731	19.0601	19.2548	11	61.2	22.729	206	0	172.25	19.1977	19.3247	19.2964	19.2052	19.6435	19.7874	19.8239
Q9SKC9	Q9SKC9	NADH dehydrogenase [ubiquinone] 1 beta subcomplex subunit 7		sp|Q9SKC9|NDUB7_ARATH NADH dehydrogenase [ubiquinone] 1 beta subcomplex subunit 7 OS=Arabidopsis thaliana GN=At2g02050 PE=3 SV=1	1	16.3569	16.3339	16.4287	16.629	16.5203	16.3956	16.4238	16.4065	17.1328	17.2518	17.1665	17.3174	16.5668	16.8083	16.7407	16.5994	16.5664	16.3463	16.5686	16.5803	16.8126	16.7484	16.4005	17.4321	17.4617	17.1079	17.1514	16.5551	16.4385	16.5312	16.5052	6	61.2	11.74	103	0	23.849	16.4549	16.4248	16.5012	16.6944	16.5762	16.4862	16.5182
Q9SE60	Q9SE60	Methylenetetrahydrofolate reductase 1	MTHFR1	sp|Q9SE60|MTHR1_ARATH Methylenetetrahydrofolate reductase 1 OS=Arabidopsis thaliana GN=MTHFR1 PE=1 SV=1	1	19.988	20.0204	19.9267	19.9341	19.9832	20.0912	20.0912	19.998	19.9819	19.5861	19.6103	19.6158	20.0508	19.9286	19.8289	19.997	20.1776	19.9453	19.786	19.9037	19.9884	19.8763	19.9749	19.7663	19.7295	19.7329	19.7391	20.3007	20.1135	20.1205	20.2291	31	61.1	66.288	592	0	323.31	19.7943	19.8197	19.7076	19.7078	19.7474	19.8901	19.894
O80837	O80837	Remorin	DBP	sp|O80837|REMO_ARATH Remorin OS=Arabidopsis thaliana GN=DBP PE=1 SV=1	1	18.0367	18.1636	18.1455	18.2531	17.937	17.8814	18.0107	17.9383	18.2282	18.3333	18.3797	18.1349	18.422	18.4278	18.181	18.222	18.1085	18.0215	18.1034	17.9519	18.0508	18.1811	18.032	18.6861	18.6304	18.4851	18.7128	18.2209	18.2333	18.0516	18.2189	15	61.1	20.968	190	0	116.95	18.2548	18.3747	18.3382	18.4386	18.113	18.0921	18.2252
P59230	P59230	60S ribosomal protein L10a-2	RPL10AB	sp|P59230|R10A2_ARATH 60S ribosomal protein L10a-2 OS=Arabidopsis thaliana GN=RPL10AB PE=1 SV=1	1	21.6174	21.588	21.6144	21.5971	21.4512	21.4372	21.5112	21.5715	21.4448	21.4101	21.4769	21.456	21.4202	21.4852	21.4998	21.4731	21.358	21.4186	21.4961	21.4819	21.3759	21.3797	21.3825	21.4074	21.4367	21.4309	21.4839	21.2456	21.2297	21.2817	21.1257	15	61.1	24.425	216	0	305.98	21.5328	21.4964	21.5044	21.4799	21.3244	21.3452	21.423
Q9SSK7	Q9SSK7	MLP-like protein 34	MLP34	sp|Q9SSK7|MLP34_ARATH MLP-like protein 34 OS=Arabidopsis thaliana GN=MLP34 PE=2 SV=1	1	18.4772	18.5053	18.4933	18.4878	18.207	18.1595	18.371	18.2872	17.8747	17.8348	18.0568	17.8244	18.3513	18.6053	18.33	18.4568	18.4615	18.0583	17.9816	18.1994	18.1383	18.2554	18.1743	17.8095	17.7367	17.7145	18.0329	18.6627	18.6415	18.3107	18.6045	14	61.1	35.57	316	0	210.63	18.3233	18.3443	18.3139	18.3013	18.0109	17.9982	18.2135
Q9SN95;Q9ZV36	Q9SN95;Q9ZV36	UDP-glucuronic acid decarboxylase 5;UDP-glucuronic acid decarboxylase 6	UXS5;UXS6	sp|Q9SN95|UXS5_ARATH UDP-glucuronic acid decarboxylase 5 OS=Arabidopsis thaliana GN=UXS5 PE=2 SV=1;sp|Q9ZV36|UXS6_ARATH UDP-glucuronic acid decarboxylase 6 OS=Arabidopsis thaliana GN=UXS6 PE=2 SV=1	2	15.102	15.0064	14.9825	15.1038	14.9565	14.8655	15.0701	15.1997	14.9625	14.6096	14.6383	14.7832	14.9701	15.0604	14.9386	15.0928	15.0532	15.1527	14.9386	15.0321	15.2218	14.9761	15.123	14.9024	14.6914	14.8478	14.9038	15.5853	15.4546	15.6454	15.649	20	61	38.389	341	0	11.754	15.5454	15.4428	15.4005	15.5146	15.3578	15.3015	15.51
P25697	P25697	Phosphoribulokinase, chloroplastic		sp|P25697|KPPR_ARATH Phosphoribulokinase, chloroplastic OS=Arabidopsis thaliana GN=At1g32060 PE=2 SV=1	1	19.4489	19.2872	19.3489	19.3905	19.3357	19.4694	19.6457	19.4951	19.0372	18.8951	18.9826	19.0567	19.4439	19.5559	19.3247	19.4887	19.2854	19.3432	19.26	19.6325	19.6364	19.5988	19.5412	19.727	19.5867	19.6148	19.6383	19.9382	19.9152	19.657	19.814	18	61	44.463	395	0	323.31	19.1338	18.9651	19.0084	19.0428	18.9784	19.1469	19.3271
Q9FDZ9	Q9FDZ9	60S ribosomal protein L21-2	RPL21E	sp|Q9FDZ9|RL212_ARATH 60S ribosomal protein L21-2 OS=Arabidopsis thaliana GN=RPL21E PE=2 SV=1	1	20.3	20.2176	20.2713	20.2616	20.1782	20.1331	20.1857	20.2289	20.1134	20.0684	20.1721	20.1476	20.1677	20.1589	20.1161	20.0624	20.0238	20.1058	20.111	20.0897	20.0072	19.9901	19.9442	20.013	19.9882	19.9495	19.9672	19.8977	19.8843	19.9155	19.7702	16	61	18.709	164	0	108.9	20.474	20.3846	20.4199	20.4029	20.31	20.2996	20.3561
Q43291	Q43291	60S ribosomal protein L21-1	RPL21A	sp|Q43291|RL211_ARATH 60S ribosomal protein L21-1 OS=Arabidopsis thaliana GN=RPL21A PE=2 SV=2	1	16.9602	16.8117	16.8534	16.7838	16.8001	16.6827	16.8	16.8509	16.7229	16.5297	16.7153	16.6607	16.7841	16.6905	16.6569	16.4978	16.577	16.5366	16.5619	16.5305	16.4307	16.5233	16.4527	16.4272	16.4063	16.5021	16.4204	16.3805	16.3643	16.5208	16.3038	15	61	18.653	164	0.00012784	3.1627	18.0542	17.8986	17.9219	17.8451	17.8519	17.7693	17.8904
Q9XGY4	Q9XGY4	Mitochondrial import inner membrane translocase subunit TIM8	TIM8	sp|Q9XGY4|TIM8_ARATH Mitochondrial import inner membrane translocase subunit TIM8 OS=Arabidopsis thaliana GN=TIM8 PE=1 SV=1	1	14.7603	14.5962	14.7816	14.7538	14.7963	14.7271	14.7751	14.6484	15.1876	15.3336	15.156	15.49	14.8683	14.7134	14.8486	14.9034	15.0111	15.1204	15.0255	14.8731	15.0367	15.1311	14.7817	15.3488	15.3766	15.3105	15.2907	14.6291	14.6098	14.6282	14.4749	4	61	8.7501	77	0	3.8643	14.8691	14.698	14.865	14.83	14.8629	14.8285	14.8803
P38389;Q9M206	P38389	Protein transport protein Sec61 subunit beta		sp|P38389|SC61B_ARATH Protein transport protein Sec61 subunit beta OS=Arabidopsis thaliana GN=At2g45070 PE=1 SV=1	2	14.2069	14.2235	14.069	14.162	14.2936	14.4585	14.4533	14.2097	14.402	14.3188	14.2924	14.135	14.2223	14.1706	14.2336	14.1001	14.4432	14.3926	14.2176	13.4353	13.7333	13.9121	13.8204	14.6767	14.7929	14.8585	14.6727	14.215	14.0808	13.8591	14.2168	3	61	8.2165	82	0	53.012	14.6962	14.7057	14.5329	14.6187	14.7408	14.9404	14.9391
F4K0E8	F4K0E8	4-hydroxy-3-methylbut-2-en-1-yl diphosphate synthase (ferredoxin), chloroplastic	ISPG	sp|F4K0E8|ISPG_ARATH 4-hydroxy-3-methylbut-2-en-1-yl diphosphate synthase (ferredoxin), chloroplastic OS=Arabidopsis thaliana GN=ISPG PE=1 SV=1	1	20.3699	20.507	20.4923	20.719	20.071	20.0717	19.9343	20.1943	20.1129	19.7616	19.7971	19.7334	20.6641	20.8484	20.4744	20.6743	20.6028	20.617	20.5614	20.5496	20.6233	20.5914	20.5275	20.0064	19.8705	19.9538	20.0171	20.7057	20.7344	20.7496	20.8279	45	60.9	82.256	741	0	323.31	20.4531	20.5833	20.5501	20.7696	20.1121	20.1476	20.014
Q9FJZ7	Q9FJZ7		At5g66420	tr|Q9FJZ7|Q9FJZ7_ARATH AT5G66420 protein OS=Arabidopsis thaliana GN=At5g66420 PE=2 SV=1	1	19.3614	19.4872	19.4464	19.4558	19.3024	19.2924	19.278	19.3108	19.2118	19.1197	19.1397	19.1322	19.3755	19.4004	19.3594	19.4364	19.3027	19.4359	19.3401	19.5423	19.5101	19.4851	19.5767	19.3667	19.2976	19.3748	19.3769	19.4471	19.4814	19.5781	19.5683	40	60.9	80.718	754	0	323.31	19.2916	19.4103	19.3511	19.3533	19.1904	19.2152	19.2045
Q8LF21	Q8LF21	Dynamin-related protein 1C	DRP1C	sp|Q8LF21|DRP1C_ARATH Dynamin-related protein 1C OS=Arabidopsis thaliana GN=DRP1C PE=1 SV=2	1	19.2617	19.2931	19.2919	19.277	19.292	19.402	19.3315	19.3085	19.2918	19.2421	19.3039	19.2828	19.225	19.2325	19.3145	19.2657	19.2546	19.3435	19.3604	19.1884	19.1634	19.1565	19.1672	19.3789	19.406	19.5485	19.4001	19.1158	19.0936	19.1802	19.1642	38	60.9	68.722	614	0	323.31	19.3762	19.4006	19.381	19.3589	19.3644	19.5091	19.4424
O22263	O22263	Protein disulfide-isomerase like 2-1	PDIL2-1	sp|O22263|PDI21_ARATH Protein disulfide-isomerase like 2-1 OS=Arabidopsis thaliana GN=PDIL2-1 PE=2 SV=1	1	19.2524	19.247	19.1596	19.0439	19.4099	19.3896	19.3621	19.2796	19.3241	19.5578	19.4561	19.5209	19.2091	19.1312	19.1452	19.1235	19.2522	19.0591	18.9308	18.9506	19.0293	19.0123	18.9574	19.4526	19.5056	19.4505	19.3597	19.0967	18.9738	18.8715	19.0163	22	60.9	39.496	361	0	188.48	19.4491	19.4367	19.3309	19.208	19.5644	19.5789	19.5553
Q03251	Q03251	Glycine-rich RNA-binding protein 8	RBG8	sp|Q03251|RBG8_ARATH Glycine-rich RNA-binding protein 8 OS=Arabidopsis thaliana GN=RBG8 PE=1 SV=1	1	17.9643	18.1525	17.9828	18.1113	17.4024	17.4509	17.5032	17.5394	18.2642	18.1844	18.2487	18.3305	18.1374	18.1419	17.8889	18.1764	18.131	18.0485	18.0238	17.5081	17.5003	17.7451	17.711	17.9333	17.8481	17.9758	17.9078	17.395	17.4941	17.4267	17.4283	9	60.9	16.578	169	0	323.31	18.2427	18.4239	18.2358	18.357	17.6386	17.7219	17.778
Q9ZW34	Q9ZW34	Cytosolic enolase 3	ENO3	sp|Q9ZW34|ENO3_ARATH Cytosolic enolase 3 OS=Arabidopsis thaliana GN=ENO3 PE=1 SV=1	1	18.764	18.9444	18.8889	19.0246	18.7934	18.7997	18.7129	18.8361	18.8228	18.854	18.6925	18.7435	18.9722	19.0061	18.8943	18.9711	18.8726	18.8537	18.8641	18.933	18.9549	18.9345	18.9333	18.8779	18.8537	18.8264	18.8627	18.9105	18.9653	18.9575	19.0278	22	60.8	51.599	475	0	289.43	18.7454	18.9188	18.8448	18.9733	18.7326	18.7736	18.6907
O49482	O49482	Cinnamyl alcohol dehydrogenase 5	CAD5	sp|O49482|CADH5_ARATH Cinnamyl alcohol dehydrogenase 5 OS=Arabidopsis thaliana GN=CAD5 PE=1 SV=1	1	18.5058	18.6585	18.5967	18.5349	18.6694	18.691	18.715	18.7144	18.1268	17.7391	17.7597	17.7876	18.4147	18.3004	18.2874	18.4603	18.4275	18.3404	18.0987	18.5546	18.5577	18.5143	18.7155	17.6935	17.7002	17.877	17.7241	18.6128	18.7129	18.5701	18.6585	17	60.8	38.743	357	0	233.14	18.5462	18.6918	18.6116	18.5426	18.6675	18.7239	18.7518
Q9CAR7	Q9CAR7	Hypersensitive-induced response protein 2	HIR2	sp|Q9CAR7|HIR2_ARATH Hypersensitive-induced response protein 2 OS=Arabidopsis thaliana GN=HIR2 PE=1 SV=1	1	17.1529	17.335	17.3442	17.3255	17.2655	17.1833	17.2909	17.2546	17.4696	17.7073	17.5806	17.5448	17.3391	17.4195	17.3413	17.3629	17.2521	17.1576	17.1278	17.1275	17.1498	17.2841	17.1342	17.6596	17.6141	17.5732	17.6267	17.1772	17.1442	17.0627	17.2181	17	60.8	31.405	286	0	53.61	17.0133	17.1884	17.1792	17.1533	17.0838	17.0364	17.1478
Q9S831	Q9S831	Photosystem I reaction center subunit IV A, chloroplastic	PSAE1	sp|Q9S831|PSAE1_ARATH Photosystem I reaction center subunit IV A, chloroplastic OS=Arabidopsis thaliana GN=PSAE1 PE=1 SV=1	1	17.3765	17.5346	17.4012	17.6074	17.5225	17.4633	17.3732	17.3314	18.388	18.7081	18.4245	18.4682	17.8137	17.9233	17.812	17.6648	18.1463	17.9888	18.0009	17.4746	17.753	17.7293	17.5944	18.3386	18.2536	17.8216	18.0278	18.2704	18.0704	18.0017	18.1234	8	60.8	14.967	143	0	125	17.588	17.7391	17.5873	17.7863	17.6918	17.6673	17.5811
O65719	O65719	Heat shock 70 kDa protein 3	HSP70-3	sp|O65719|HSP7C_ARATH Heat shock 70 kDa protein 3 OS=Arabidopsis thaliana GN=HSP70-3 PE=1 SV=1	1	19.154	19.2604	19.1017	19.0832	20.0699	20.1578	20.0528	19.8948	19.2328	19.2548	19.2386	19.3235	19.1402	19.1329	19.125	19.1651	19.3219	19.2695	19.2653	19.126	19.1184	19.0386	19.0344	19.2632	19.4081	19.4187	19.2594	19.2087	19.1474	19.142	19.1581	40	60.7	71.147	649	0	323.31	19.3425	19.4418	19.2648	19.239	20.2162	20.3389	20.2377
F4JJT9	F4JJT9		At4g33760	sp|F4JJT9|SYDM_ARATH Aspartate--tRNA ligase, chloroplastic/mitochondrial OS=Arabidopsis thaliana GN=At4g33760 PE=2 SV=1	1	19.4712	19.5134	19.5489	19.6722	19.4877	19.4778	19.5273	19.5597	19.6379	19.648	19.6221	19.6654	19.646	19.7148	19.5433	19.598	19.6259	19.5805	19.6486	19.6699	19.7091	19.7211	19.6978	19.6259	19.5522	19.55	19.515	19.7061	19.7334	19.793	19.8205	34	60.7	74.516	664	0	323.31	19.6568	19.692	19.7091	19.8252	19.6312	19.656	19.7094
Q9M888	Q9M888	T-complex protein 1 subunit zeta 1	CCT6A	sp|Q9M888|TCPZA_ARATH T-complex protein 1 subunit zeta 1 OS=Arabidopsis thaliana GN=CCT6A PE=1 SV=1	1	19.822	19.7602	19.7592	19.8544	19.9501	19.9672	19.9841	19.9755	20.0295	20.0455	20.0529	19.9632	19.8602	19.8234	19.7936	19.8174	19.8013	19.8922	20.0066	20.1065	19.9761	20.1695	20.2015	19.7335	19.7634	19.7665	19.7621	19.8006	20.0112	20.0658	19.9559	31	60.7	58.949	535	0	323.31	19.8709	19.8021	19.7827	19.8707	19.9569	20.0087	20.0294
Q9LQK0;Q9CAI1	Q9LQK0;Q9CAI1	Developmentally-regulated G-protein 1;Developmentally-regulated G-protein 2	DRG1;DRG2	sp|Q9LQK0|DRG1_ARATH Developmentally-regulated G-protein 1 OS=Arabidopsis thaliana GN=DRG1 PE=1 SV=1;sp|Q9CAI1|DRG2_ARATH Developmentally-regulated G-protein 2 OS=Arabidopsis thaliana GN=DRG2 PE=2 SV=1	2	19.032	19.1343	19.0251	19.1071	19.1234	19.0469	19.1255	19.1606	19.1595	19.1985	19.2834	19.1773	19.0557	19.0683	19.0711	19.1041	19.0733	19.1521	19.1938	19.1983	19.1311	19.2429	19.2043	19.2182	19.321	19.3826	19.2499	18.9805	19.0658	19.2768	19.1879	24	60.7	44.639	399	0	222.4	18.7185	18.8138	18.6862	18.761	18.7677	18.7259	18.8084
P41127;Q9SMT4	P41127	60S ribosomal protein L13-1	RPL13B	sp|P41127|RL131_ARATH 60S ribosomal protein L13-1 OS=Arabidopsis thaliana GN=RPL13B PE=1 SV=1	2	20.9385	20.8799	20.9342	20.9415	20.8649	20.8064	20.8488	20.8988	20.7939	20.7845	20.8487	20.8273	20.8355	20.8734	20.9281	20.8496	20.6745	20.7128	20.7616	20.7667	20.6461	20.6198	20.6471	20.613	20.666	20.6352	20.6628	20.53	20.517	20.5662	20.4112	21	60.7	23.767	206	0	323.31	20.7479	20.6823	20.7181	20.7182	20.6321	20.6084	20.6546
O23016	O23016	Probable voltage-gated potassium channel subunit beta	KAB1	sp|O23016|KCAB_ARATH Probable voltage-gated potassium channel subunit beta OS=Arabidopsis thaliana GN=KAB1 PE=1 SV=1	1	19.3804	19.3954	19.3939	19.5284	19.2384	19.1544	19.3149	19.3404	19.4728	18.9663	19.0632	19.0528	19.423	19.4375	19.2652	19.4002	19.4721	19.4534	19.5817	19.4767	19.359	19.5308	19.5803	19.1358	19.1584	19.2555	19.1546	19.1686	19.2867	19.2731	19.337	18	60.7	36.538	328	0	243.26	19.4158	19.4238	19.4038	19.5311	19.2316	19.1823	19.3467
Q9LTV6;Q9XE46	Q9LTV6	Peroxisomal 2,4-dienoyl-CoA reductase		sp|Q9LTV6|DECR2_ARATH Peroxisomal 2,4-dienoyl-CoA reductase OS=Arabidopsis thaliana GN=At3g12800 PE=2 SV=1	2	18.4048	18.335	18.4261	18.4073	18.5683	18.3726	18.3879	18.503	18.993	19.2041	19.1692	19.1733	18.2274	18.3494	18.4747	18.3549	18.3652	18.4694	18.6369	18.6286	18.3637	18.6426	18.4255	18.4418	18.4041	18.4518	18.413	18.4263	18.4867	18.6026	18.6182	17	60.7	31.796	298	0	264.49	18.3905	18.3137	18.3864	18.3604	18.5119	18.3509	18.3701
Q9SVR0	Q9SVR0	60S ribosomal protein L13a-3	RPL13AC	sp|Q9SVR0|R13A3_ARATH 60S ribosomal protein L13a-3 OS=Arabidopsis thaliana GN=RPL13AC PE=2 SV=1	1	17.9346	18.0273	18.0528	18.1568	17.9213	18.0105	17.9994	18.0319	17.972	17.8123	17.9449	17.8926	18.0141	18.0171	17.9691	17.9892	17.877	17.7678	17.8155	17.6765	17.7748	17.7733	17.7408	17.8078	17.7181	17.8035	17.8372	17.9726	18.023	18.0623	17.8292	17	60.7	23.629	206	0	18.958	17.7493	17.835	17.8421	17.9389	17.6938	17.8177	17.8105
O49377;Q9SIQ9;Q9LFS4	O49377	Vesicle-associated membrane protein 711	VAMP711	sp|O49377|VA711_ARATH Vesicle-associated membrane protein 711 OS=Arabidopsis thaliana GN=VAMP711 PE=1 SV=2	3	17.1959	17.2371	17.1314	17.046	17.2463	17.2393	17.1888	17.1953	17.063	17.161	17.1872	17.1255	17.2008	17.1609	17.1121	17.2028	17.0863	17.08	16.9894	17.0975	17.0249	17.0374	17.0531	17.6926	17.7687	17.8224	17.7581	17.1572	17.0398	16.9707	17.0969	11	60.7	25.039	219	0	178.43	17.0536	17.0877	16.9636	16.8711	17.0618	17.0896	17.0429
Q9FJN8	Q9FJN8	Ras-related protein RABA4a	RABA4A	sp|Q9FJN8|RAA4A_ARATH Ras-related protein RABA4a OS=Arabidopsis thaliana GN=RABA4A PE=1 SV=1	1	17.3171	17.4676	17.3204	17.2735	17.5124	17.4368	17.4141	17.413	17.5057	17.6383	17.5185	17.5085	17.4706	17.4316	17.413	17.4152	17.3494	17.2851	17.2272	17.2788	17.3641	17.3601	17.279	17.9002	17.9404	17.888	17.7827	17.4524	17.15	17.238	17.3776	15	60.6	24.842	226	0	65.816	17.2282	17.3717	17.2061	17.1519	17.3813	17.3405	17.3216
O23715	O23715	Proteasome subunit alpha type-3	PAG1	sp|O23715|PSA3_ARATH Proteasome subunit alpha type-3 OS=Arabidopsis thaliana GN=PAG1 PE=1 SV=2	1	19.2512	19.0579	19.0372	18.8767	19.2065	19.1774	19.4394	19.1773	18.8498	18.7358	18.813	18.8457	18.926	18.8699	18.9692	19.0168	18.8376	18.8208	18.7266	19.0598	18.9723	19.0684	19.0591	19.183	19.2764	19.2502	19.0868	18.9954	18.9473	18.8068	18.9426	14	60.6	27.377	249	0	216.51	19.1505	18.9501	18.911	18.7434	19.0636	19.0692	19.3351
Q9C718	Q9C718	DEAD-box ATP-dependent RNA helicase 20	RH20	sp|Q9C718|RH20_ARATH DEAD-box ATP-dependent RNA helicase 20 OS=Arabidopsis thaliana GN=RH20 PE=2 SV=1	1	19.3641	19.3975	19.4503	19.3796	19.3401	19.2271	19.286	19.3353	19.3473	19.427	19.4547	19.4995	19.2795	19.4383	19.4954	19.4264	19.1454	19.2261	19.3862	19.2782	19.2436	19.2725	19.2291	19.1914	19.1364	19.1479	19.2995	19.1309	19.1558	19.1526	19.0829	29	60.5	55.575	501	0	222.09	19.4428	19.4692	19.5036	19.4257	19.3767	19.2984	19.3611
O23049	O23049	50S ribosomal protein L6, chloroplastic	RPL6	sp|O23049|RK6_ARATH 50S ribosomal protein L6, chloroplastic OS=Arabidopsis thaliana GN=RPL6 PE=2 SV=1	1	20.8126	20.7262	20.821	20.9818	20.7635	20.6783	20.5755	20.812	20.9344	20.804	20.9441	20.8355	20.8161	20.945	20.8227	20.8011	20.8572	20.888	21.0832	20.9171	20.8112	20.8567	20.7404	20.6673	20.672	20.6895	20.7496	20.5992	20.8015	20.8856	20.7601	17	60.5	24.705	223	0	212.69	20.9628	20.8694	20.9459	21.0994	20.8715	20.8212	20.7222
Q9SF85	Q9SF85	Adenosine kinase 1	ADK1	sp|Q9SF85|ADK1_ARATH Adenosine kinase 1 OS=Arabidopsis thaliana GN=ADK1 PE=1 SV=1	1	18.7793	18.8805	18.7126	18.618	18.8869	18.9784	18.912	18.8478	18.9388	18.8848	18.7259	18.9065	18.9101	18.8487	18.8196	18.9472	18.8164	18.7752	18.5631	18.9879	18.955	18.8794	18.9449	19.2153	19.134	19.1588	19.0916	19.0338	18.9267	19.0086	18.9222	16	60.5	37.836	344	0	219.57	18.4128	18.507	18.3207	18.2189	18.4782	18.6045	18.5419
Q9SW09	Q9SW09	40S ribosomal protein S10-1	RPS10A	sp|Q9SW09|RS101_ARATH 40S ribosomal protein S10-1 OS=Arabidopsis thaliana GN=RPS10A PE=2 SV=1	1	20.1765	20.06	20.133	20.1282	19.9145	19.8596	19.9704	20.0122	19.9877	19.9352	20.0264	19.9732	19.9436	20.0092	20.0171	19.9826	19.7465	19.7665	19.8363	19.8359	19.7157	19.7708	19.7424	19.833	19.8151	19.837	19.8563	19.5676	19.4905	19.5604	19.4225	13	60.5	19.447	177	0	150.38	20.1672	20.0437	20.0983	20.0863	19.863	19.8429	19.9576
Q9ZPI1	Q9ZPI1	Lysine--tRNA ligase		sp|Q9ZPI1|SYKC_ARATH Lysine--tRNA ligase, cytoplasmic OS=Arabidopsis thaliana GN=At3g11710 PE=1 SV=1	1	20.0161	20.0115	20.0068	20.1417	20.1067	20.197	20.1223	20.1065	20.0435	19.7814	19.7685	19.582	20.1202	19.8851	19.788	19.9861	20.1538	20.1182	20.2707	20.1541	20.093	20.2892	20.3852	19.8475	19.8958	19.835	19.8612	19.9426	20.2107	20.1214	20.1367	36	60.4	70.887	626	0	323.31	20.1192	20.1076	20.0845	20.2122	20.1677	20.2927	20.2219
Q8L7N0	Q8L7N0	T-complex protein 1 subunit zeta 2	CCT6B	sp|Q8L7N0|TCPZB_ARATH T-complex protein 1 subunit zeta 2 OS=Arabidopsis thaliana GN=CCT6B PE=1 SV=1	1	17.5093	17.3889	17.3865	17.503	17.6401	17.6823	17.7222	17.6768	17.7341	17.7627	17.7518	17.7089	17.5369	17.4604	17.5032	17.5117	17.4685	17.6612	17.7736	17.7881	17.6281	17.9397	17.9635	17.4385	17.5316	17.5271	17.5545	17.5076	17.803	17.8193	17.717	31	60.4	58.927	535	0	133.35	17.4126	17.2852	17.2644	17.3736	17.5012	17.5782	17.6219
Q93VG5	Q93VG5	40S ribosomal protein S8-1	RPS8A	sp|Q93VG5|RS81_ARATH 40S ribosomal protein S8-1 OS=Arabidopsis thaliana GN=RPS8A PE=2 SV=1	1	21.297	21.2821	21.2389	21.2296	21.15	21.1562	21.2074	21.2091	21.1132	21.0992	21.1592	21.1719	21.1486	21.1793	21.2749	21.2084	21.0086	21.0567	21.1304	21.1069	21.0372	21.0008	21.0249	21.0575	21.0443	21.0254	21.0807	20.8657	20.9064	20.9616	20.7556	18	60.4	24.993	222	0	323.31	21.182	21.1601	21.0985	21.0821	20.9929	21.0338	21.0889
Q56WN1	Q56WN1	Glutamine synthetase cytosolic isozyme 1-1	GLN1-1	sp|Q56WN1|GLN11_ARATH Glutamine synthetase cytosolic isozyme 1-1 OS=Arabidopsis thaliana GN=GLN1-1 PE=1 SV=2	1	18.7503	18.7873	18.5604	18.4806	18.9083	18.9419	19.1066	18.8148	18.4458	18.4265	18.4725	18.4448	18.6733	18.5291	18.5629	18.6804	18.5625	18.5674	18.3034	18.7988	18.8822	18.7641	18.7985	18.8525	18.8855	18.992	18.7903	18.7735	18.7332	18.6858	18.7421	17	60.4	39.115	356	0	323.31	19.1047	19.1346	18.8894	18.8023	19.2205	19.2888	19.4575
Q9ZSI6	Q9ZSI6		T15B16.5	tr|Q9ZSI6|Q9ZSI6_ARATH At4g01700 OS=Arabidopsis thaliana GN=T15B16.5 PE=2 SV=1	1	18.3325	18.2164	18.3628	18.2879	18.4722	18.4227	18.5235	18.5708	18.6082	18.8362	18.8488	18.5682	18.0995	18.2915	18.3334	18.2494	17.928	18.1528	18.0864	18.4157	18.2078	18.1037	18.1063	18.188	18.1827	18.6703	18.2047	18.1016	18.0293	18.3202	18.1224	14	60.4	31.464	280	0	323.31	18.362	18.2389	18.3669	18.2848	18.4595	18.4448	18.5495
O23657	O23657	Ras-related protein RABC1	RABC1	sp|O23657|RABC1_ARATH Ras-related protein RABC1 OS=Arabidopsis thaliana GN=RABC1 PE=1 SV=1	1	18.1971	18.3673	18.2114	18.1419	18.44	18.3487	18.3054	18.2523	18.3303	18.4223	18.3234	18.3262	18.3251	18.2758	18.2177	18.2383	18.2083	18.2115	18.1037	18.1728	18.2667	18.1972	18.1726	18.7908	18.8882	18.8427	18.7713	18.2134	17.9553	18.1699	18.2425	12	60.4	23.53	212	0	68.439	18.0589	18.222	18.0477	17.971	18.2596	18.2031	18.1636
Q9MBH2	Q9MBH2		At3g28940	tr|Q9MBH2|Q9MBH2_ARATH AIG2 protein-like OS=Arabidopsis thaliana GN=At3g28940 PE=2 SV=1	1	17.2034	17.2945	17.183	17.1289	17.2649	17.3279	17.3802	17.2946	17.4641	17.4436	17.352	17.5024	17.3586	17.2587	17.3237	17.4018	17.1216	17.2599	17.1006	17.4515	17.4066	17.3925	17.4365	17.8564	17.7584	17.7945	17.6609	17.4632	17.5103	17.4096	17.3981	10	60.4	19.465	169	0	125.13	17.3658	17.4499	17.32	17.2588	17.3852	17.4829	17.5391
Q9MAC4	Q9MAC4		T4P13.18	tr|Q9MAC4|Q9MAC4_ARATH At3g01130 OS=Arabidopsis thaliana GN=T4P13.18 PE=1 SV=1	1	15.5375	15.4548	15.6545	15.7835	15.5568	15.4492	15.4648	15.5111	15.8267	15.8733	15.81	15.9453	15.6529	15.7277	15.5468	15.5993	15.7626	15.825	15.8756	15.5661	15.8033	15.9428	15.5808	16.251	16.2239	16.0485	16.0591	15.7803	15.6039	15.6564	15.6481	2	60.4	5.5465	53	0	23.783	15.1686	15.0788	15.2602	15.382	15.1457	15.0729	15.0923
Q9FVT2	Q9FVT2	Probable elongation factor 1-gamma 2		sp|Q9FVT2|EF1G2_ARATH Probable elongation factor 1-gamma 2 OS=Arabidopsis thaliana GN=At1g57720 PE=2 SV=1	1	20.3654	20.3526	20.2128	20.0581	20.3318	20.4215	20.4433	20.3114	19.858	19.7456	19.7258	19.7344	20.131	20.178	20.166	20.1929	20.3488	20.1164	19.9546	20.3414	20.3686	20.2219	20.3216	19.9724	20.0176	19.9692	19.9179	20.6237	20.3852	20.3088	20.5093	25	60.3	46.4	413	0	323.31	20.4907	20.4709	20.3126	20.1508	20.4149	20.5393	20.565
Q9SLN5	Q9SLN5	Methionine aminopeptidase 1A	MAP1A	sp|Q9SLN5|MAP1A_ARATH Methionine aminopeptidase 1A OS=Arabidopsis thaliana GN=MAP1A PE=1 SV=1	1	17.4643	17.5227	17.5017	17.6181	17.4483	17.4014	17.5009	17.4659	17.8124	17.9805	17.8706	17.9288	17.4979	17.5435	17.4969	17.5028	17.73	17.7242	17.8591	17.5407	17.5188	17.6917	17.6574	17.6414	17.6176	17.6421	17.6059	17.4822	17.6571	17.6899	17.6428	21	60.3	43.992	398	0	308.04	17.2261	17.2774	17.238	17.3472	17.1679	17.1557	17.2591
Q94BS2	Q94BS2		ZKT	tr|Q94BS2|Q94BS2_ARATH GAN OS=Arabidopsis thaliana GN=ZKT PE=2 SV=1	1	17.9034	18.0439	17.905	17.922	18.1074	18.1289	18.0262	17.9509	18.659	18.9448	18.7356	18.6346	18.1902	18.1712	18.1791	18.1036	18.7698	18.479	18.4185	17.8722	18.1047	18.0263	18.0205	18.4883	18.444	18.1515	18.3207	18.7682	18.3615	18.3595	18.5311	19	60.3	37.41	335	0	220.37	17.7267	17.8602	17.7029	17.7127	17.8886	17.9448	17.8459
Q94K30	Q94K30		At1g01800	tr|Q94K30|Q94K30_ARATH AT1G01800 protein OS=Arabidopsis thaliana GN=At1g01800 PE=2 SV=1	1	18.9852	19.0852	18.9331	18.901	19.0328	19.125	19.0372	18.9914	18.5376	18.3482	18.4255	18.5234	18.9337	18.9543	18.9164	18.979	18.8432	18.6739	18.52	18.9405	19.1414	18.8781	18.9485	18.7542	18.5799	18.708	18.7824	19.169	19.1605	18.9933	19.0631	15	60.3	31.66	295	0	323.31	19.142	19.2349	19.0645	19.0252	19.1474	19.2744	19.1904
Q9SAI5	Q9SAI5	60S ribosomal protein L7-1	RPL7A	sp|Q9SAI5|RL71_ARATH 60S ribosomal protein L7-1 OS=Arabidopsis thaliana GN=RPL7A PE=2 SV=1	1	17.5583	17.3651	17.5406	17.3944	17.5279	17.5664	17.6057	17.4006	17.8014	17.8732	17.9373	18.0522	17.2753	17.239	17.556	17.4329	17.5227	17.7348	17.7215	17.6286	17.4751	17.605	17.5419	17.4013	17.5144	17.5334	17.258	17.0509	17.1512	17.3677	17.125	14	60.3	28.344	247	0	90.154	17.4205	17.2202	17.3774	17.2239	17.3479	17.4212	17.4644
Q56WH1;B9DHQ0	Q56WH1;B9DHQ0	Tubulin alpha-3 chain;Tubulin alpha-5 chain	TUBA3;TUBA5	sp|Q56WH1|TBA3_ARATH Tubulin alpha-3 chain OS=Arabidopsis thaliana GN=TUBA3 PE=1 SV=2;sp|B9DHQ0|TBA5_ARATH Tubulin alpha-5 chain OS=Arabidopsis thaliana GN=TUBA5 PE=1 SV=2	2	19.2151	19.2329	19.2542	19.3954	19.0452	19.051	19.0438	19.2412	18.8031	18.3593	18.5561	18.4909	19.3444	19.3299	19.0746	19.2496	19.2001	19.2839	19.2179	19.4589	19.4232	19.4166	19.4733	19.1248	19.0051	19.0868	19.2078	19.4007	19.5602	19.5222	19.5255	24	60.2	49.654	450	0	323.31	19.2015	19.2123	19.2151	19.3492	18.9895	19.03	19.0266
Q9SF29	Q9SF29	Syntaxin-71	SYP71	sp|Q9SF29|SYP71_ARATH Syntaxin-71 OS=Arabidopsis thaliana GN=SYP71 PE=1 SV=1	1	18.3158	18.4688	18.352	18.3746	18.1998	18.1502	18.3459	18.208	18.3584	18.3617	18.3628	18.2115	18.582	18.5778	18.3761	18.3988	18.4226	18.3114	18.344	18.1221	18.2642	18.2998	18.2288	18.8231	18.8426	18.7418	18.8404	18.3673	18.3312	18.2135	18.3652	15	60.2	29.983	266	0	323.31	18.5013	18.6472	18.512	18.5274	18.3431	18.3282	18.5278
Q9T029	Q9T029	40S ribosomal protein S25-4	RPS25E	sp|Q9T029|RS254_ARATH 40S ribosomal protein S25-4 OS=Arabidopsis thaliana GN=RPS25E PE=2 SV=1	1	20.3669	20.3488	20.3433	20.2937	20.2739	20.2274	20.3064	20.2844	20.1902	20.192	20.2482	20.2462	20.1633	20.3072	20.3481	20.2708	20.0687	20.0701	20.1447	20.1041	20.047	19.979	19.9862	20.1127	20.1222	20.0911	20.1051	19.9682	19.8905	19.9489	19.8226	9	60.2	12.053	108	0	129.9	20.1145	20.0894	20.0655	20.0087	19.9794	19.9676	20.0505
Q9ZNT1	Q9ZNT1	NADH--cytochrome b5 reductase 1	CBR1	sp|Q9ZNT1|NB5R1_ARATH NADH--cytochrome b5 reductase 1 OS=Arabidopsis thaliana GN=CBR1 PE=1 SV=1	1	18.4802	18.5878	18.4905	18.4367	18.6326	18.6448	18.6002	18.4903	18.7249	18.9082	18.7809	18.8588	18.6639	18.5758	18.5628	18.4579	18.5718	18.51	18.5253	18.3622	18.4961	18.5083	18.3986	19.1639	19.2012	19.0382	19.0403	18.6353	18.538	18.4615	18.5535	16	60.1	31.49	281	0	267.92	18.4868	18.5874	18.4717	18.4107	18.597	18.6439	18.6032
Q96252	Q96252	ATP synthase subunit delta, mitochondrial		sp|Q96252|ATP4_ARATH ATP synthase subunit delta, mitochondrial OS=Arabidopsis thaliana GN=At5g47030 PE=1 SV=1	1	17.2021	17.3096	17.4726	17.6337	17.452	17.4322	17.3524	17.4832	17.9025	18.1447	18.0672	18.1942	17.5443	17.6915	17.6039	17.6032	17.6808	17.5678	17.7399	17.8027	17.9096	17.7581	17.621	18.5123	18.6016	18.3473	18.4273	17.5752	17.5437	17.6306	17.5557	8	60.1	21.547	203	0	65.57	17.3859	17.4864	17.631	17.7849	17.5936	17.6086	17.5327
Q9SKI0	Q9SKI0			tr|Q9SKI0|Q9SKI0_ARATH At2g10940/F15K19.1 OS=Arabidopsis thaliana GN=At2g10940 PE=2 SV=1	1	17.3843	17.3842	17.4568	17.7204	17.0974	17.1222	16.9868	17.2337	17.2459	17.0634	17.2535	17.1493	17.6238	17.639	17.4759	17.5138	17.3954	17.4705	17.5372	17.5255	17.6159	17.6098	17.4433	17.8433	17.7161	17.6731	17.8435	17.5255	17.7094	17.5879	17.5071	8	60.1	29.648	291	0	44.369	17.5722	17.565	17.6192	17.8756	17.243	17.3026	17.171
Q9SGE9	Q9SGE9	Probable phenylalanine--tRNA ligase beta subunit		sp|Q9SGE9|SYFB_ARATH Phenylalanine--tRNA ligase beta subunit, cytoplasmic OS=Arabidopsis thaliana GN=At1g72550 PE=2 SV=1	1	19.5753	19.5551	19.5419	19.5313	19.5505	19.5567	19.507	19.5373	19.2805	18.9861	18.9608	18.8284	19.576	19.4946	19.4574	19.5192	19.5859	19.5479	19.6168	19.7108	19.6539	19.7312	19.8179	19.1065	19.113	19.1596	19.1804	19.8322	19.845	19.7411	19.9483	32	60	67.542	598	0	281.27	19.6749	19.6475	19.616	19.5982	19.6078	19.6488	19.603
P49691	P49691	60S ribosomal protein L4-2	RPL4D	sp|P49691|RL4B_ARATH 60S ribosomal protein L4-2 OS=Arabidopsis thaliana GN=RPL4D PE=2 SV=2	1	19.9998	19.9541	19.9565	19.9559	19.9177	19.939	19.9497	19.9719	19.8685	19.8321	19.8908	19.8697	19.8848	19.894	20.0016	19.9043	19.7806	19.7953	19.8211	19.7599	19.6651	19.6625	19.6563	19.6628	19.702	19.6844	19.7133	19.6146	19.6288	19.6314	19.4758	28	60	44.721	407	0	272.91	19.5608	19.5081	19.4921	19.4843	19.4365	19.4926	19.5071
P25857	P25857	Glyceraldehyde-3-phosphate dehydrogenase GAPB, chloroplastic	GAPB	sp|P25857|G3PB_ARATH Glyceraldehyde-3-phosphate dehydrogenase GAPB, chloroplastic OS=Arabidopsis thaliana GN=GAPB PE=1 SV=2	1	20.6064	20.5392	20.5895	20.7621	20.4845	20.8059	20.7667	20.6651	20.5468	20.25	20.3046	20.297	20.84	20.888	20.7475	20.7935	20.7395	20.8988	20.9938	20.8003	20.8942	20.7732	20.8214	20.5254	20.4201	20.4805	20.5662	21.1114	21.0771	21.0276	21.0628	25	60	47.659	447	0	323.31	21.0748	21.0005	21.0324	21.1978	20.9107	21.2668	21.2315
Q94A52	Q94A52	DEAD-box ATP-dependent RNA helicase 2	RH2	sp|Q94A52|RH2_ARATH DEAD-box ATP-dependent RNA helicase 2 OS=Arabidopsis thaliana GN=RH2 PE=2 SV=2	1	18.9596	18.9437	18.9733	18.9282	18.9972	18.9771	18.9867	18.9668	19.0232	19.1129	19.0979	19.1274	18.9137	18.8705	18.9485	18.9194	18.9726	19.0411	19.0355	19.0025	18.9585	19.0991	19.0546	18.8221	18.8505	18.9194	18.8439	18.7035	18.6621	18.9921	18.7888	24	60	45.844	408	0	278.9	19.0023	18.9794	18.9905	18.9383	18.9977	19.0124	19.0258
Q9SGY2	Q9SGY2	ATP-citrate synthase alpha chain protein 1	ACLA-1	sp|Q9SGY2|ACLA1_ARATH ATP-citrate synthase alpha chain protein 1 OS=Arabidopsis thaliana GN=ACLA-1 PE=1 SV=1	1	19.7453	19.8242	19.8601	19.8684	19.8506	19.8775	19.8116	19.9677	19.7842	19.4892	19.5829	19.3021	19.8427	19.8363	19.8481	19.7908	19.6725	19.7727	19.8491	19.9807	19.8784	19.9726	19.9624	19.8336	19.8492	19.8447	19.8652	19.7476	19.7455	19.6852	19.7338	21	60	46.678	423	0	323.31	19.8676	19.9395	19.957	19.9582	19.9308	19.9924	19.9304
P51412	P51412	50S ribosomal protein L21, chloroplastic	RPL21	sp|P51412|RK21_ARATH 50S ribosomal protein L21, chloroplastic OS=Arabidopsis thaliana GN=RPL21 PE=2 SV=1	1	18.5106	18.466	18.5897	18.6888	18.4987	18.449	18.3698	18.5379	18.6795	18.5832	18.6846	18.5948	18.5333	18.5704	18.5295	18.4843	18.6262	18.7455	18.8512	18.7117	18.5957	18.6546	18.562	18.4644	18.4304	18.4749	18.4987	18.3839	18.5696	18.7093	18.5946	12	60	24.038	220	0	323.31	18.5999	18.5483	18.6536	18.7455	18.5459	18.5308	18.4555
Q8LD39	Q8LD39		At5g09770	tr|Q8LD39|Q8LD39_ARATH At5g09770 OS=Arabidopsis thaliana GN=At5g09770 PE=2 SV=1	1	17.2848	17.2382	17.32	17.2717	17.2774	17.2743	17.3019	17.3254	17.4652	17.6396	17.7395	17.6851	17.2381	17.3083	17.4337	17.2893	17.1686	17.1822	17.2722	17.3148	17.2927	17.3282	17.2588	17.3753	17.4158	17.3463	17.2943	16.9254	16.8363	16.968	16.8919	12	60	18.445	160	0	113.97	17.5238	17.4702	17.5336	17.4781	17.4743	17.506	17.5374
A8MS32	A8MS32		At5g64130	tr|A8MS32|A8MS32_ARATH AT5G64130 protein OS=Arabidopsis thaliana GN=At5g64130 PE=1 SV=1	1	15.8104	15.5616	15.7163	15.6543	15.5694	15.6165	15.5982	15.5213	15.7387	15.7681	15.6523	15.847	15.5475	15.7282	15.71	15.6441	15.7292	15.7735	15.7798	15.6872	15.5854	15.7112	15.6485	15.7002	15.6968	15.7945	15.7551	15.5048	15.4185	15.6177	15.5477	7	60	15.143	140	0	67.789	15.8349	15.579	15.7154	15.6461	15.5517	15.6336	15.6191
P51818	P51818	Heat shock protein 90-3	HSP90-3	sp|P51818|HS903_ARATH Heat shock protein 90-3 OS=Arabidopsis thaliana GN=HSP90-3 PE=1 SV=2	1	21.3896	21.414	21.2389	21.1847	21.7525	21.9158	21.9078	21.714	20.7732	20.5784	20.6442	20.6527	21.2018	21.1602	21.1646	21.2018	21.3011	20.9319	20.6696	20.8133	20.9573	20.6777	20.8981	20.4596	20.4041	20.4835	20.492	21.4322	21.2081	21.0128	21.1559	41	59.9	80.051	699	0	323.31	21.1476	21.1649	20.9714	20.9101	21.4683	21.6664	21.6622
P55737	P55737	Heat shock protein 90-2	HSP90-2	sp|P55737|HS902_ARATH Heat shock protein 90-2 OS=Arabidopsis thaliana GN=HSP90-2 PE=1 SV=1	1	16.4253	16.4909	16.4075	16.2935	16.8144	16.9399	16.9408	16.7459	15.9336	15.6404	15.807	15.7945	16.2798	16.2675	16.2957	16.2937	16.3073	15.9752	15.8822	16.2693	16.5528	16.3035	16.4278	15.6396	15.6804	15.6796	15.6956	16.2645	16.1461	16.0835	16.0824	41	59.9	80.063	699	0	36.905	16.7762	16.8348	16.733	16.6118	17.1231	17.2835	17.2882
P49692	P49692	60S ribosomal protein L7a-1	RPL7AA	sp|P49692|RL7A1_ARATH 60S ribosomal protein L7a-1 OS=Arabidopsis thaliana GN=RPL7AA PE=1 SV=2	1	21.2832	21.2539	21.2566	21.2463	21.1722	21.1796	21.2214	21.2606	21.0846	21.07	21.1355	21.1342	21.1606	21.1901	21.301	21.2014	21.0315	21.0976	21.1654	21.1148	21.0046	20.9753	21.0231	21.0408	21.0231	21.0279	21.0753	20.8903	20.9268	20.9734	20.7914	23	59.9	29.129	257	0	196.27	21.1854	21.149	21.1333	21.1159	21.0323	21.0744	21.12
Q93VB8;Q8L8Y0	Q93VB8;Q8L8Y0	40S ribosomal protein S2-2;40S ribosomal protein S2-1	RPS2B;RPS2A	sp|Q93VB8|RS22_ARATH 40S ribosomal protein S2-2 OS=Arabidopsis thaliana GN=RPS2B PE=2 SV=1;sp|Q8L8Y0|RS21_ARATH 40S ribosomal protein S2-1 OS=Arabidopsis thaliana GN=RPS2A PE=2 SV=2	2	19.2584	19.1825	19.1838	19.132	19.0513	18.9097	19.0518	19.0931	19.0083	19.0081	19.1134	19.0544	19.0143	19.0611	19.0275	18.9933	18.7833	18.8465	18.9702	19.0007	18.8632	18.894	18.91	18.9232	18.9399	18.9221	18.9944	18.7401	18.8097	18.9547	18.6974	22	59.9	30.771	284	0	103.34	19.9136	19.8307	19.8135	19.7546	19.6643	19.5575	19.7035
Q9LPV8	Q9LPV8	Eukaryotic peptide chain release factor subunit 1-2	ERF1-2	sp|Q9LPV8|ERF1Y_ARATH Eukaryotic peptide chain release factor subunit 1-2 OS=Arabidopsis thaliana GN=ERF1-2 PE=1 SV=1	1	18.4331	18.4551	18.4585	18.5229	18.3551	18.3692	18.4251	18.4609	18.4725	18.4593	18.5243	18.5161	18.3183	18.3352	18.3273	18.409	18.4663	18.5085	18.6033	18.4352	18.3666	18.5183	18.5394	18.2543	18.3425	18.4483	18.3432	18.2395	18.3257	18.3657	18.3581	20	59.9	48.941	434	0	323.31	18.4142	18.4292	18.4142	18.4714	18.294	18.3429	18.4026
Q9FE18	Q9FE18		T1K7.8	tr|Q9FE18|Q9FE18_ARATH Peptidyl-prolyl cis-trans isomerase NIMA-interacting 4 OS=Arabidopsis thaliana GN=T1K7.8 PE=2 SV=1	1	16.9677	16.9385	17.1143	17.1085	17.0538	16.8972	16.9331	16.9829	17.1229	17.1244	17.1095	17.2055	16.9287	17.0086	17.134	17.0885	17.0363	17.0454	17.0146	17.0069	17.0851	17.1127	17.0209	17.0302	16.9678	16.9573	17.1004	16.9984	17.0589	17.2826	17.0963	7	59.9	14.857	142	0	38.681	16.9766	16.9404	17.0977	17.0848	17.0205	16.8986	16.9385
F4JVN6	F4JVN6	Tripeptidyl-peptidase 2	TPP2	sp|F4JVN6|TPPII_ARATH Tripeptidyl-peptidase 2 OS=Arabidopsis thaliana GN=TPP2 PE=1 SV=1	1	21.7051	21.6669	21.6685	21.6362	21.6948	21.5529	21.7337	21.6389	21.5397	21.6042	21.7044	21.7002	21.4882	21.5722	21.5959	21.6524	21.3934	21.5112	21.3693	21.6967	21.5708	21.5342	21.6212	21.6504	21.6387	21.6928	21.6895	21.7618	21.6901	21.7512	21.7003	73	59.8	152.37	1380	0	323.31	21.8025	21.7574	21.7405	21.701	21.7501	21.6429	21.8276
Q9SF16	Q9SF16	T-complex protein 1 subunit eta	CCT7	sp|Q9SF16|TCPH_ARATH T-complex protein 1 subunit eta OS=Arabidopsis thaliana GN=CCT7 PE=1 SV=1	1	19.9747	19.9412	19.8816	19.914	20.1127	20.1431	20.1609	20.1381	20.1464	20.197	20.1802	20.0928	19.973	19.9343	19.9601	19.9521	19.9509	20.0206	20.1629	20.2619	20.1131	20.2861	20.3536	19.8309	19.8443	19.8566	19.8175	19.9786	20.18	20.2295	20.074	31	59.8	59.776	557	0	323.31	19.9818	19.9412	19.8633	19.8885	20.0776	20.1427	20.1644
P35614	P35614	Eukaryotic peptide chain release factor subunit 1-3	ERF1-3	sp|P35614|ERF1Z_ARATH Eukaryotic peptide chain release factor subunit 1-3 OS=Arabidopsis thaliana GN=ERF1-3 PE=1 SV=1	1	19.4037	19.445	19.3862	19.4448	19.381	19.2793	19.3873	19.4053	19.4071	19.4499	19.5122	19.4463	19.3228	19.3066	19.3468	19.3393	19.3311	19.4582	19.5503	19.4251	19.35	19.4482	19.4316	19.2374	19.2991	19.3782	19.3312	19.1684	19.2214	19.3374	19.2223	23	59.8	49.007	435	0	323.31	18.9759	19.0101	18.933	18.9843	18.9109	18.844	18.9558
Q9LZH9	Q9LZH9	60S ribosomal protein L7a-2	RPL7AB	sp|Q9LZH9|RL7A2_ARATH 60S ribosomal protein L7a-2 OS=Arabidopsis thaliana GN=RPL7AB PE=1 SV=1	1	17.8457	17.8669	17.777	17.7033	17.7313	17.6689	17.7281	17.7735	17.6713	17.5837	17.618	17.6055	17.6406	17.7233	17.8093	17.6927	17.4168	17.4896	17.5721	17.5303	17.4692	17.4303	17.4297	17.4678	17.3471	17.3762	17.4502	17.1649	17.2631	17.4309	17.1818	21	59.8	29.034	256	0	25.878	17.6139	17.6281	17.5198	17.4388	17.4573	17.4297	17.4927
Q9LSQ5	Q9LSQ5	NAD(P)H dehydrogenase (quinone) FQR1	FQR1	sp|Q9LSQ5|FQR1_ARATH NAD(P)H dehydrogenase (quinone) FQR1 OS=Arabidopsis thaliana GN=FQR1 PE=1 SV=1	1	18.6411	18.3283	18.6594	18.2351	18.2416	18.1643	18.2699	18.0729	18.1015	18.1726	18.1746	18.1246	18.2672	18.2201	18.2288	18.2066	17.9636	18.1409	17.8856	18.0843	18.1283	18.0401	17.9658	18.5566	18.5319	18.5364	18.4337	18.1737	17.944	17.9167	18.0154	9	59.8	21.796	204	0	282.36	18.6589	18.3391	18.6518	18.2202	18.2172	18.1747	18.2842
Q9ZNV4	Q9ZNV4	Cytochrome B5 isoform C	CYTB5-C	sp|Q9ZNV4|CYB5C_ARATH Cytochrome B5 isoform C OS=Arabidopsis thaliana GN=CYTB5-C PE=1 SV=1	1	17.1431	17.2256	17.2284	17.1695	17.16	17.1065	17.0346	17.1457	17.263	17.4317	17.3064	17.4563	17.1099	17.2273	17.2136	17.1124	17.5597	17.3673	17.1046	17.1189	17.1953	17.258	16.9715	17.7613	17.9105	17.5331	17.5676	17.5257	17.3475	17.2297	17.3549	5	59.8	14.873	132	0	78.937	17.4591	17.5346	17.519	17.4528	17.4338	17.415	17.347
Q9C525;Q9LIF9	Q9C525	Beta-glucosidase 21	BGLU21	sp|Q9C525|BGL21_ARATH Beta-glucosidase 21 OS=Arabidopsis thaliana GN=BGLU21 PE=1 SV=1	2	21.1619	21.0154	20.8444	20.4809	21.0669	20.9405	20.9046	20.7214	20.5442	20.4154	20.3711	20.1294	20.8836	20.6296	20.6745	20.7486	21.0683	20.8527	20.6331	20.4424	20.4742	20.4643	20.5574	20.1951	20.2788	20.2057	20.2312	21.3423	21.021	20.5835	21.0227	29	59.7	59.663	524	0	323.31	21.0435	20.89	20.7006	20.3299	20.9064	20.8147	20.7826
Q9CAD1	Q9CAD1		F24D7.15	tr|Q9CAD1|Q9CAD1_ARATH At1g63660 OS=Arabidopsis thaliana GN=F24D7.15 PE=2 SV=1	1	18.6971	18.6553	18.7102	18.8547	18.6848	18.6961	18.6812	18.7148	19.0032	18.9607	18.881	18.7774	18.7003	18.7201	18.6956	18.714	18.7415	18.676	18.7269	19.002	18.8703	19.0477	19.1659	18.4859	18.5992	18.611	18.4885	18.483	18.6186	18.6892	18.737	27	59.7	59.314	534	0	323.31	18.5905	18.5416	18.5781	18.7154	18.536	18.5821	18.571
Q96327	Q96327	ERBB-3 BINDING PROTEIN 1	EBP1	sp|Q96327|EBP1_ARATH ERBB-3 BINDING PROTEIN 1 OS=Arabidopsis thaliana GN=EBP1 PE=1 SV=1	1	20.9132	20.8749	20.9168	20.9153	20.9029	20.8592	20.9846	20.9842	20.9105	21.0417	21.0449	20.989	20.8836	20.8443	20.8927	20.8291	20.5998	20.7207	20.8709	20.9065	20.7571	20.814	20.8156	20.7923	20.7895	20.7668	20.721	20.4567	20.5556	20.5223	20.4371	25	59.7	42.979	392	0	323.31	20.9533	20.908	20.9314	20.9228	20.9008	20.8919	21.0211
Q41969	Q41969	Eukaryotic translation initiation factor 2 subunit beta	EMB1401	sp|Q41969|IF2B_ARATH Eukaryotic translation initiation factor 2 subunit beta OS=Arabidopsis thaliana GN=EMB1401 PE=1 SV=3	1	18.5923	18.5325	18.5394	18.5371	18.4739	18.4126	18.4957	18.496	18.7153	18.789	18.8129	18.7734	18.5335	18.5024	18.5391	18.5546	18.5129	18.5448	18.6395	18.51	18.409	18.5931	18.5684	18.525	18.5859	18.5431	18.539	18.2034	18.3046	18.3378	18.3109	18	59.7	30.663	268	0	274.71	18.5369	18.4701	18.4586	18.4491	18.3763	18.3498	18.4368
Q96251	Q96251	ATP synthase subunit O, mitochondrial		sp|Q96251|ATPO_ARATH ATP synthase subunit O, mitochondrial OS=Arabidopsis thaliana GN=At5g13450 PE=1 SV=2	1	17.9689	18.0886	18.1126	18.2702	18.1528	18.1145	18.0036	18.1065	18.5286	18.728	18.6408	18.8013	18.2675	18.3996	18.3163	18.2395	18.2816	18.181	18.2921	18.2921	18.4963	18.3521	18.26	19.0182	19.0061	18.719	18.7974	18.2167	18.1534	18.2794	18.1974	14	59.7	26.321	238	0	79.25	17.9835	18.0963	18.1019	18.2522	18.1253	18.1218	18.0148
Q42029;O49344	Q42029	Oxygen-evolving enhancer protein 2-1, chloroplastic	PSBP1	sp|Q42029|PSBP1_ARATH Oxygen-evolving enhancer protein 2-1, chloroplastic OS=Arabidopsis thaliana GN=PSBP1 PE=1 SV=2	2	18.9001	18.76	18.7214	18.6938	18.7889	18.8256	18.9453	18.7048	19.4548	19.5858	19.5419	19.5755	18.9124	18.9812	18.9611	18.9649	19.5198	19.2815	19.1542	18.7505	18.9156	18.818	18.7661	19.4309	19.2874	18.957	19.108	19.6731	19.437	19.0874	19.3653	11	59.7	28.095	263	0	323.31	19.0494	18.9024	18.8453	18.8106	18.8961	18.9675	19.091
O49160	O49160	Eukaryotic translation initiation factor 3 subunit C	TIF3C1	sp|O49160|EIF3C_ARATH Eukaryotic translation initiation factor 3 subunit C OS=Arabidopsis thaliana GN=TIF3C1 PE=1 SV=2	1	20.9847	20.9358	20.934	20.8266	21.0504	21.0438	21.0575	21.1115	21.063	21.034	21.11	21.0325	20.8852	20.8119	21.1711	20.8714	20.8131	20.9048	20.9675	20.9419	20.8711	20.8629	20.8756	21	21.0738	21.1027	20.9967	20.6999	20.7507	20.798	20.759	55	59.6	102.95	900	0	323.31	20.7578	20.7018	20.6817	20.5671	20.7813	20.8095	20.827
Q9SRV5	Q9SRV5	5-methyltetrahydropteroyltriglutamate--homocysteine methyltransferase 2	MS2	sp|Q9SRV5|METE2_ARATH 5-methyltetrahydropteroyltriglutamate--homocysteine methyltransferase 2 OS=Arabidopsis thaliana GN=MS2 PE=1 SV=1	1	19.4883	19.4258	19.3876	19.0787	19.5422	19.7049	19.688	19.5971	18.9808	19.0439	19.1072	19.0617	19.2182	19.1089	19.3228	19.2805	19.2173	19.0908	18.9553	19.3827	19.3075	19.3142	19.4346	18.8432	18.9135	18.8685	18.8179	19.445	19.3157	19.0743	19.2604	44	59.6	84.583	765	0	323.31	19.5456	19.4762	19.4195	19.1034	19.5574	19.7548	19.7418
O04499	O04499	2,3-bisphosphoglycerate-independent phosphoglycerate mutase 1	PGM1	sp|O04499|PMG1_ARATH 2,3-bisphosphoglycerate-independent phosphoglycerate mutase 1 OS=Arabidopsis thaliana GN=PGM1 PE=2 SV=3	1	20.08	19.9026	19.916	19.7345	19.9737	20.1213	20.1818	20.0626	19.3668	19.321	19.3169	19.3764	19.8446	19.9197	19.8763	19.8916	19.6171	19.5195	19.3919	20.2854	20.253	19.9659	20.2322	19.5943	19.5137	19.5857	19.5094	20.574	20.5169	20.2278	20.6012	31	59.6	60.579	557	0	323.31	20.253	20.0685	20.0636	19.8749	20.1046	20.2869	20.3512
Q42564;Q7XZP5	Q42564	L-ascorbate peroxidase 3, peroxisomal	APX3	sp|Q42564|APX3_ARATH L-ascorbate peroxidase 3, peroxisomal OS=Arabidopsis thaliana GN=APX3 PE=1 SV=1	2	18.0781	18.2158	18.2149	18.1995	18.2351	18.1858	18.0793	18.1101	18.6947	18.9784	18.7833	18.9586	18.3106	18.3227	18.3839	18.2251	18.2648	18.2035	18.1985	18.0437	18.2172	18.1881	18.0273	18.8892	18.9012	18.8548	18.7891	18.1924	18.055	18.1299	18.1716	21	59.6	31.571	287	0	156.67	17.9222	18.0529	18.0335	18.011	18.037	18.0225	17.9198
P51418	P51418	60S ribosomal protein L18a-2	RPL18AB	sp|P51418|R18A2_ARATH 60S ribosomal protein L18a-2 OS=Arabidopsis thaliana GN=RPL18AB PE=2 SV=2	1	20.7348	20.7014	20.7253	20.6789	20.6507	20.5716	20.623	20.65	20.5378	20.4458	20.5785	20.55	20.5774	20.5853	20.6308	20.5613	20.4828	20.5234	20.5081	20.5507	20.4725	20.4394	20.4443	20.4284	20.4225	20.423	20.4141	20.373	20.3643	20.3861	20.2226	13	59.6	21.307	178	0	323.31	20.7656	20.7252	20.7307	20.6771	20.6394	20.595	20.6503
Q9LZ06	Q9LZ06	Glutathione S-transferase L3	GSTL3	sp|Q9LZ06|GSTL3_ARATH Glutathione S-transferase L3 OS=Arabidopsis thaliana GN=GSTL3 PE=2 SV=1	1	17.6842	17.6977	17.7221	17.6329	17.6988	17.7609	17.762	17.6876	17.876	17.9204	17.8164	18.0007	17.7019	17.6929	17.7396	17.7935	17.7843	17.8021	17.7539	17.763	17.7477	17.7547	17.7472	17.9768	17.9799	17.9824	17.9819	17.9079	17.9529	17.8994	17.82	13	59.6	27.09	235	0	57.863	17.8392	17.8456	17.8516	17.7552	17.8116	17.9084	17.9134
Q9ZVF2	Q9ZVF2	MLP-like protein 329	MLP329	sp|Q9ZVF2|ML329_ARATH MLP-like protein 329 OS=Arabidopsis thaliana GN=MLP329 PE=2 SV=1	1	16.6605	16.6057	16.4863	16.4199	16.4215	16.4067	16.716	16.5477	16.0679	16.0465	16.1655	16.01	16.5433	16.5562	16.4216	16.552	16.0697	15.939	15.9774	16.3504	16.6247	16.3696	16.5078	16.1874	16.179	16.1909	16.3992	16.4489	16.4426	16.3243	16.2859	8	59.6	17.602	151	0	38.53	16.5319	16.47	16.3322	16.2587	16.2507	16.2706	16.5839
Q84W56	Q84W56		emb2746	tr|Q84W56|Q84W56_ARATH Putative uncharacterized protein At5g63420 OS=Arabidopsis thaliana GN=emb2746 PE=1 SV=1	1	20.1686	20.0993	20.2385	20.2816	20.226	20.1727	20.1739	20.2141	20.3733	20.3365	20.3737	20.3681	20.2024	20.2338	20.2559	20.205	20.1314	20.2426	20.3135	20.2835	20.1878	20.3469	20.2129	20.1598	20.1411	20.2408	20.131	20.0724	20.14	20.3461	20.2047	50	59.5	100.55	911	0	323.31	20.1461	20.0697	20.1905	20.2265	20.1613	20.1427	20.1478
Q9FY50	Q9FY50	50S ribosomal protein L10, chloroplastic	RPL10	sp|Q9FY50|RK10_ARATH 50S ribosomal protein L10, chloroplastic OS=Arabidopsis thaliana GN=RPL10 PE=2 SV=1	1	19.8462	19.8302	19.925	20.0936	19.8094	19.8211	19.7132	19.913	20.048	19.9763	20.1423	20.0361	19.8738	20.0489	19.9225	19.8844	19.9152	19.9987	20.1064	20.018	19.9257	20.0277	19.9083	20.0279	20.0188	20.0006	20.1087	19.7304	19.9349	20.0048	19.9174	16	59.5	24.736	220	0	323.31	19.5905	19.5675	19.6439	19.8053	19.5115	19.558	19.4539
P0CAN7	P0CAN7	V-type proton ATPase subunit E3	VHA-E3	sp|P0CAN7|VATE3_ARATH V-type proton ATPase subunit E3 OS=Arabidopsis thaliana GN=VHA-E3 PE=2 SV=1	1	15.9875	16.2934	16.0799	16.2147	16.3022	16.1386	16.1062	16.2298	16.0348	16.2301	16.3102	16.1862	16.3413	16.309	16.1146	16.2675	16.1163	16.0847	16.0902	16.0897	16.144	16.2696	16.2868	16.5542	16.554	16.5205	16.6363	16.3078	16.3576	16.355	16.3153	12	59.5	27.085	237	0	86.626	16.3048	16.6037	16.3718	16.4994	16.5773	16.4485	16.4199
Q94C59	Q94C59	Patellin-4	PATL4	sp|Q94C59|PATL4_ARATH Patellin-4 OS=Arabidopsis thaliana GN=PATL4 PE=1 SV=2	1	19.5668	19.5374	19.4006	19.2596	19.4068	19.5565	19.5856	19.463	18.7382	18.428	18.6101	18.4394	19.7585	19.4846	19.4254	19.4179	19.2583	19.154	19.1003	19.5465	19.7527	19.4216	19.5816	19.6741	19.586	19.412	19.7378	19.644	19.6514	19.4942	19.4593	30	59.4	61.189	540	0	256.9	19.5961	19.5598	19.4045	19.2564	19.394	19.5784	19.6114
Q43314	Q43314	Glutamate dehydrogenase 1	GDH1	sp|Q43314|DHE1_ARATH Glutamate dehydrogenase 1 OS=Arabidopsis thaliana GN=GDH1 PE=2 SV=1	1	19.0907	18.7194	18.541	18.2728	19.8472	19.277	19.8975	19.1807	18.3365	18.5732	18.4655	18.473	18.2463	18.1447	18.3828	18.3165	18.3909	18.2013	18.1368	18.6871	18.3757	18.5402	18.5846	18.2471	18.2174	18.4221	18.1411	18.6308	18.4319	18.0325	18.6571	22	59.4	44.524	411	0	173.34	19.0915	18.7132	18.5164	18.241	19.8058	19.2704	19.8948
Q940B0	Q940B0	60S ribosomal protein L18-3	RPL18C	sp|Q940B0|RL183_ARATH 60S ribosomal protein L18-3 OS=Arabidopsis thaliana GN=RPL18C PE=2 SV=1	1	21.5016	21.4512	21.5116	21.4527	21.395	21.348	21.4061	21.4445	21.3158	21.2465	21.3649	21.3267	21.3291	21.3813	21.4013	21.3319	21.2092	21.2445	21.2618	21.2643	21.1659	21.1282	21.132	21.1294	21.13	21.1476	21.1529	21.0557	21.0199	21.1209	20.9075	17	59.4	20.967	187	0	323.31	21.5517	21.4943	21.5363	21.4703	21.4029	21.3907	21.4527
Q94JX9	Q94JX9	Nascent polypeptide-associated complex subunit alpha-like protein 2		sp|Q94JX9|NACA2_ARATH Nascent polypeptide-associated complex subunit alpha-like protein 2 OS=Arabidopsis thaliana GN=At3g49470 PE=2 SV=2	1	19.3907	19.3589	19.4221	19.4585	19.18	19.155	19.229	19.3086	19.2925	19.3333	19.4447	19.4352	19.3379	19.4847	19.4295	19.4215	19.1346	19.1754	19.2692	19.379	19.2738	19.2994	19.2137	19.298	19.345	19.323	19.3709	19.1446	19.1088	19.0735	19.0325	11	59.4	23.712	217	0	186.23	19.6588	19.62	19.6647	19.694	19.406	19.4157	19.4936
Q9C5G6	Q9C5G6			tr|Q9C5G6|Q9C5G6_ARATH Peptidase C15, pyroglutamyl peptidase I-like protein OS=Arabidopsis thaliana GN=At1g23430 PE=2 SV=1	1	17.1519	17.2628	17.2769	17.1712	17.4997	17.4103	17.417	17.462	16.9688	16.7082	16.7985	16.7636	17.2538	17.0621	17.185	17.1686	17.0019	16.9914	17.0423	17.2334	17.2325	17.1873	17.2309	16.9227	16.8913	16.9413	16.914	16.9841	17.0384	17.0513	17.075	10	59.4	23.618	217	0	196.71	16.9862	17.09	17.0857	16.9729	17.2918	17.2372	17.2477
O65396	O65396	Aminomethyltransferase, mitochondrial	GDCST	sp|O65396|GCST_ARATH Aminomethyltransferase, mitochondrial OS=Arabidopsis thaliana GN=GDCST PE=2 SV=1	1	20.0572	20.0483	20.1913	20.2112	20.1021	20.2061	20.1555	20.2154	20.5608	20.7183	20.7006	20.787	20.1538	20.1084	20.2261	20.1253	20.3441	20.3008	20.4181	20.0025	20.0713	19.9369	19.9782	20.0647	20.0145	20.1085	20.2208	19.8103	20.0501	20.0743	19.9258	23	59.3	44.444	408	0	316.61	19.8009	19.785	19.9096	19.9223	19.8036	19.9423	19.8956
Q9FKA5	Q9FKA5	Uncharacterized protein At5g39570		sp|Q9FKA5|Y5957_ARATH Uncharacterized protein At5g39570 OS=Arabidopsis thaliana GN=At5g39570 PE=1 SV=1	1	18.9025	18.9258	18.8126	18.6114	18.6447	18.6951	18.8304	18.7091	18.456	18.3435	18.2688	18.198	18.826	18.6948	18.6592	18.7738	18.5704	18.324	18.0451	18.3158	18.4489	18.3731	18.3933	18.6677	18.5514	18.477	18.512	18.5053	18.4939	18.0518	18.3619	22	59.3	43.526	381	0	241.4	18.5417	18.558	18.4263	18.218	18.2417	18.3269	18.466
Q9AST9	Q9AST9			tr|Q9AST9|Q9AST9_ARATH At1g73110/F3N23_39 OS=Arabidopsis thaliana GN=At1g73110 PE=2 SV=1	1	18.5545	18.5112	18.6766	18.8371	18.5506	18.6338	18.4894	18.6419	18.7503	18.7158	18.6925	18.7458	18.8091	18.7882	18.6982	18.7217	18.7507	18.8603	18.9677	18.892	18.8728	18.9437	18.9327	18.7049	18.643	18.8095	18.8182	18.5989	18.796	18.9655	18.7504	20	59.3	48.325	432	0	206.77	18.6242	18.5738	18.7209	18.8741	18.5781	18.6961	18.5555
Q6ICZ8	Q6ICZ8	Nascent polypeptide-associated complex subunit alpha-like protein 3		sp|Q6ICZ8|NACA3_ARATH Nascent polypeptide-associated complex subunit alpha-like protein 3 OS=Arabidopsis thaliana GN=At5g13850 PE=1 SV=1	1	20.1636	20.1807	20.1691	20.1298	20.0573	20.0213	20.0793	20.1412	19.9965	20.0478	20.1613	20.121	20.065	20.1093	20.1218	20.0773	19.7496	19.8405	19.906	20.0642	19.9103	19.8922	19.8826	20.0028	19.9705	19.9555	20.0194	19.7269	19.6427	19.6604	19.5295	9	59.3	22.057	204	0	323.31	20.1705	20.1806	20.1505	20.1041	20.022	20.0208	20.0826
Q6NPR7;Q9SD39	Q6NPR7	Probable methyltransferase PMT24		sp|Q6NPR7|PMTO_ARATH Probable methyltransferase PMT24 OS=Arabidopsis thaliana GN=At1g29470 PE=2 SV=1	2	18.927	18.9396	18.9584	18.8917	19.0658	19.1076	19.0372	18.956	18.9518	19.1593	19.0543	19.0612	18.9688	19.0062	19.0284	18.9564	18.9451	19.0564	19.1379	18.9578	18.9893	19.0119	18.9541	19.7991	19.827	19.8851	19.888	18.954	18.8899	18.8888	18.9534	42	59.2	87.204	770	0	323.31	18.9981	19.0037	19.004	18.9302	19.0947	19.1713	19.1047
Q9S841	Q9S841	Oxygen-evolving enhancer protein 1-2, chloroplastic	PSBO2	sp|Q9S841|PSBO2_ARATH Oxygen-evolving enhancer protein 1-2, chloroplastic OS=Arabidopsis thaliana GN=PSBO2 PE=1 SV=1	1	18.3577	18.3661	18.2523	18.327	18.5032	18.3694	18.4044	18.3227	19.234	19.4895	19.1695	19.2355	18.7136	18.7536	18.6114	18.6424	19.4351	19.2326	19.0991	18.1393	18.6105	18.5307	18.474	19.2052	19.2132	18.5037	18.7633	19.4124	19.0206	19.0543	19.1897	21	59.2	35.019	331	0	323.31	18.3017	18.303	18.1709	18.2384	18.4051	18.306	18.3448
F4J6A1;Q9FI86	F4J6A1	Eukaryotic translation initiation factor 3 subunit G	EIF3G1	tr|F4J6A1|F4J6A1_ARATH Eukaryotic translation initiation factor 3 subunit G OS=Arabidopsis thaliana GN=EIF3G1 PE=3 SV=1	2	19.8148	19.7261	19.7476	19.6367	19.7482	19.782	19.8179	19.7643	19.8659	19.9163	20.0237	19.95	19.6365	19.6489	19.7177	19.6946	19.5168	19.5993	19.6883	19.6501	19.4881	19.6283	19.5864	19.559	19.6697	19.7532	19.5612	19.1954	19.2795	19.3029	19.2493	20	59.2	35.663	321	0	254.58	19.8653	19.7695	19.7726	19.6545	19.7565	19.825	19.8648
Q93WI0	Q93WI0	Rhodanese-like/PpiC domain-containing protein 12		sp|Q93WI0|STR12_ARATH Rhodanese-like/PpiC domain-containing protein 12, chloroplastic OS=Arabidopsis thaliana GN=At5g19370 PE=1 SV=1	1	19.0098	18.9642	19.0184	19.0058	18.9816	19.087	18.9342	19.0353	18.8337	18.8248	18.6821	18.8379	19.0234	19.0279	19.0554	18.9952	19.1356	19.1046	19.0021	19.1176	19.2138	19.0489	19.1217	18.8009	18.8461	18.7871	18.8836	19.2438	19.2335	19.2735	19.2002	15	59.2	32.98	299	0	105.32	18.9802	18.9276	18.9634	18.9436	18.9098	19.0499	18.9011
F4I116	F4I116		At1g09620	sp|F4I116|SYLC_ARATH Leucine--tRNA ligase, cytoplasmic OS=Arabidopsis thaliana GN=At1g09620 PE=1 SV=1	1	21.3419	21.4263	21.4294	21.5219	21.3307	21.4004	21.3773	21.4783	21.0182	20.9119	20.8269	20.8946	21.4298	21.5659	21.4394	21.5582	21.2451	21.2906	21.3624	21.6395	21.6112	21.597	21.678	21.2814	21.32	21.3285	21.429	21.4826	21.5971	21.556	21.6014	56	59.1	123.45	1091	0	323.31	21.4595	21.5368	21.5215	21.6068	21.406	21.5105	21.4913
Q56YU0	Q56YU0	Aldehyde dehydrogenase family 2 member C4	ALDH2C4	sp|Q56YU0|AL2C4_ARATH Aldehyde dehydrogenase family 2 member C4 OS=Arabidopsis thaliana GN=ALDH2C4 PE=1 SV=2	1	18.8402	18.8435	18.8148	18.8344	19.0827	19.0373	19.1689	18.9579	18.586	18.3379	18.3874	18.4074	18.7929	18.7344	18.8014	18.8776	18.9013	18.9238	18.7431	18.9389	18.9089	18.9159	18.9225	18.8728	18.85	18.9673	18.8193	19.0326	18.9722	19.0026	18.9504	28	59.1	54.36	501	0	221.52	18.8471	18.8433	18.7962	18.8086	19.0473	19.0367	19.1721
Q9FYR6;REV__Q8LDV3;C0SUT9	Q9FYR6		OVA6	sp|Q9FYR6|SYPM_ARATH Proline--tRNA ligase, chloroplastic/mitochondrial OS=Arabidopsis thaliana GN=OVA6 PE=2 SV=1	3	19.2685	19.2782	19.3894	19.4	19.3114	19.27	19.1713	19.3593	18.9853	18.6671	18.7364	18.6904	19.4276	19.4134	19.377	19.4083	19.1642	19.0653	19.021	19.5455	19.5423	19.4411	19.5266	19.0014	18.8999	18.9294	19.0021	19.5557	19.5927	19.4448	19.6255	26	59.1	60.746	543	0	323.31	19.319	19.3216	19.4144	19.4179	19.3197	19.3131	19.2182
Q9C5Z2	Q9C5Z2	Eukaryotic translation initiation factor 3 subunit H	TIF3H1	sp|Q9C5Z2|EIF3H_ARATH Eukaryotic translation initiation factor 3 subunit H OS=Arabidopsis thaliana GN=TIF3H1 PE=1 SV=2	1	19.1626	19.1347	19.1304	19.0454	19.1822	19.1988	19.2341	19.2451	19.1766	19.2186	19.3233	19.2364	19.0034	19.0252	19.061	19.0353	19.0301	19.1519	19.2504	19.2581	19.096	19.1956	19.1868	19.2118	19.3021	19.4094	19.2467	18.856	18.9213	18.9729	18.8915	17	59.1	38.372	337	0	323.31	19.3948	19.3599	19.3372	19.2451	19.3723	19.4236	19.4628
Q8LFT2	Q8LFT2	Dynamin-related protein 3B	DRP3B	sp|Q8LFT2|DRP3B_ARATH Dynamin-related protein 3B OS=Arabidopsis thaliana GN=DRP3B PE=1 SV=2	1	19.2733	19.2902	19.3003	19.2779	19.4115	19.3335	19.3857	19.2949	19.5739	19.7016	19.6442	19.6344	19.2676	19.2219	19.2856	19.2205	19.3661	19.4664	19.5246	19.2504	19.2687	19.4293	19.3335	19.3349	19.4157	19.5402	19.3901	19.1048	19.0842	19.2694	19.1889	42	59	86.643	780	0	316.4	19.5442	19.554	19.5457	19.5161	19.6402	19.5969	19.653
Q9LFA3	Q9LFA3	Probable monodehydroascorbate reductase, cytoplasmic isoform 3		sp|Q9LFA3|MDAR1_ARATH Monodehydroascorbate reductase 1, peroxisomal OS=Arabidopsis thaliana GN=MDAR1 PE=1 SV=1	1	18.8594	18.8579	18.7443	18.6796	18.8209	18.8281	18.7981	18.8657	19.0147	18.701	18.6309	18.7011	18.9132	18.7148	18.8606	18.85	18.9088	18.7804	18.5899	18.7206	18.766	18.7515	18.7871	18.7727	18.7108	18.7482	18.6763	18.9048	18.8457	18.7328	18.821	22	59	46.487	434	0	173.99	18.9105	18.902	18.7699	18.6981	18.8298	18.8718	18.8456
Q9SDM9;O04318	Q9SDM9	Nitrile-specifier protein 1	NSP1	sp|Q9SDM9|JAL28_ARATH Nitrile-specifier protein 1 OS=Arabidopsis thaliana GN=NSP1 PE=2 SV=2	2	17.5545	17.7601	17.5378	17.636	17.5309	17.466	17.5296	17.546	17.7138	17.6847	17.7446	17.8011	17.9755	17.8149	17.6196	17.8974	17.5934	17.6529	17.4943	17.6331	17.6649	17.8257	17.8249	18.1336	17.9264	17.9796	17.9892	17.7784	17.7915	17.5467	17.5974	24	58.9	51.669	470	0	136.64	17.6945	17.8931	17.6524	17.7434	17.6288	17.5986	17.666
Q9FLF0	Q9FLF0	40S ribosomal protein S9-2	RPS9C	sp|Q9FLF0|RS92_ARATH 40S ribosomal protein S9-2 OS=Arabidopsis thaliana GN=RPS9C PE=1 SV=1	1	16.6489	16.9912	16.5682	16.8261	16.4822	16.3568	16.4977	16.5326	16.8823	17.1497	17.2176	17.0684	16.6372	16.7061	16.4295	16.7155	16.6629	16.5592	16.604	16.5001	16.5362	16.7822	16.7032	16.6519	16.84	16.879	16.8084	16.4352	16.3196	16.4308	16.4517	16	58.9	23.16	197	0	18.232	16.1058	16.4411	15.9997	16.2504	15.8969	15.8062	15.951
Q8H0V3	Q8H0V3	Lactoylglutathione lyase		sp|Q8H0V3|LGUL_ARATH Lactoylglutathione lyase OS=Arabidopsis thaliana GN=At1g08110 PE=2 SV=1	1	15.8606	15.9511	15.8265	15.8794	15.8246	15.8956	15.8995	15.8122	16.119	16.1142	16.0918	16.2135	16.1584	16.0828	15.9978	16.1527	15.8517	16.0103	15.919	15.9266	15.8818	16.1298	16.1329	16.3132	16.1839	16.2403	16.2534	15.9985	16.264	16.0315	15.9633	8	58.9	20.848	185	0	86.519	15.7604	15.8438	15.7009	15.7466	15.6822	15.788	15.7957
Q9MA55;Q8RWD9	Q9MA55	Acyl-CoA-binding domain-containing protein 4	ACBP4	sp|Q9MA55|ACBP4_ARATH Acyl-CoA-binding domain-containing protein 4 OS=Arabidopsis thaliana GN=ACBP4 PE=1 SV=1	2	18.9574	18.9336	18.9315	18.9763	18.9669	18.9424	18.932	18.9482	18.9015	18.8188	18.8515	18.8459	18.9407	18.8913	18.9111	18.9731	18.9338	18.955	18.813	18.9648	18.966	18.9493	18.9758	18.9584	18.972	18.9907	18.9502	18.7707	18.7347	18.793	18.8081	30	58.8	73.074	668	0	323.31	19.1233	19.0924	19.0719	19.1096	19.0906	19.1009	19.0943
O82660	O82660	Photosystem II stability/assembly factor HCF136, chloroplastic	HCF136	sp|O82660|P2SAF_ARATH Photosystem II stability/assembly factor HCF136, chloroplastic OS=Arabidopsis thaliana GN=HCF136 PE=1 SV=1	1	19.2429	19.1998	19.309	19.3208	19.0999	19.2441	19.1974	19.1942	19.2864	19.3162	19.1867	19.304	19.3071	19.3477	19.3938	19.4144	19.409	19.3663	19.2635	19.1478	19.2182	19.1212	19.1476	19.3883	19.291	19.2833	19.3811	19.5965	19.4144	19.3253	19.3547	22	58.8	44.103	403	0	323.31	19.3593	19.3091	19.3999	19.4045	19.174	19.353	19.3101
Q9LKR8	Q9LKR8	Rubisco accumulation factor 1, chloroplastic	RAF1	sp|Q9LKR8|RAF1_ARATH Rubisco accumulation factor 1, chloroplastic OS=Arabidopsis thaliana GN=RAF1 PE=2 SV=1	1	19.1489	18.9839	19.1412	19.2643	18.9199	18.8386	18.813	19.0511	18.8475	18.5215	18.5438	18.4448	19.2099	19.2629	19.0404	19.224	19.1818	19.1962	19.1771	19.4219	19.4243	19.4092	19.4284	18.5442	18.4837	18.5038	18.5352	19.4543	19.5142	19.4741	19.5679	22	58.8	48.236	434	0	323.31	19.2543	19.0823	19.2212	19.337	18.9831	18.9366	18.9149
Q5XF82	Q5XF82	Jacalin-related lectin 11	JAL11	sp|Q5XF82|JAL11_ARATH Jacalin-related lectin 11 OS=Arabidopsis thaliana GN=JAL11 PE=2 SV=1	1	18.5865	18.7069	18.6087	18.9977	18.5912	18.8585	18.8242	18.6692	18.9006	18.9291	18.7766	18.6358	18.9788	18.7065	18.3913	18.7213	18.8367	18.7144	18.7505	18.4829	18.7837	18.9405	19.0592	18.7414	18.6794	18.9929	18.9454	18.8326	18.8888	18.5495	18.8039	20	58.8	48.523	444	0	323.31	18.8229	18.9362	18.8196	19.2014	18.7854	19.0874	19.0569
Q9S9M7	Q9S9M7		T24D18.18	tr|Q9S9M7|Q9S9M7_ARATH Putative uncharacterized protein At1g16080 OS=Arabidopsis thaliana GN=T24D18.18 PE=1 SV=1	1	17.9487	17.9324	17.9774	18.0902	17.6687	17.794	17.8062	17.7764	18.152	18.2501	18.329	18.4066	18.042	18.1277	18.0384	18.0429	17.8742	17.9571	18.0322	17.9461	17.949	18.032	17.9769	18.0719	17.9882	18.0026	18.1886	17.8187	17.865	17.8097	17.7683	15	58.8	34.13	313	0	161.07	18.1189	18.0956	18.1222	18.2278	17.7967	17.9568	17.9729
Q8S4Y1	Q8S4Y1	Acetyl-CoA acetyltransferase, cytosolic 1	AAT1	sp|Q8S4Y1|THIC1_ARATH Acetyl-CoA acetyltransferase, cytosolic 1 OS=Arabidopsis thaliana GN=AAT1 PE=2 SV=1	1	17.9285	17.9131	17.8027	17.6309	17.9316	17.7966	17.8638	17.7187	17.6183	17.5492	17.4907	17.4551	17.7891	17.7285	17.6935	17.8024	17.9144	17.6141	17.573	17.4884	17.479	17.4738	17.5365	17.4668	17.4239	17.3322	17.3635	17.6157	17.634	17.3893	17.63	14	58.8	41.411	403	0	323.31	18.0973	18.0749	17.946	17.7671	18.0582	17.958	18.029
O24520	O24520	Non-symbiotic hemoglobin 1	AHB1	sp|O24520|HBL1_ARATH Non-symbiotic hemoglobin 1 OS=Arabidopsis thaliana GN=AHB1 PE=1 SV=1	1	18.9085	19.2441	18.9967	18.9239	19.1845	19.2291	19.1698	19.0742	18.9002	18.6827	18.8019	18.8649	18.7675	18.8904	18.9612	19.0301	18.7076	18.4474	18.2137	19.0124	18.9999	18.9845	19.082	18.2909	18.4328	18.5403	18.1375	18.7272	18.5593	18.579	18.7624	10	58.8	18.034	160	0	158.29	19.2643	19.5928	19.327	19.2471	19.4981	19.5775	19.5219
O82230	O82230		At2g24020	sp|O82230|EBFC2_ARATH Nucleoid-associated protein At2g24020, chloroplastic OS=Arabidopsis thaliana GN=At2g24020 PE=2 SV=2	1	18.1489	18.2694	18.1683	18.3748	18.3569	18.2412	18.1747	18.0914	18.1358	17.9302	17.7897	17.8877	18.0278	17.9975	18.0842	18.0489	18.5386	18.3348	18.0339	18.2915	18.332	18.3248	18.2522	18.0453	17.9448	17.8831	17.8235	18.3394	18.3229	18.2913	18.2635	9	58.8	19.811	182	0	122.11	18.5881	18.7016	18.5821	18.7814	18.7539	18.673	18.6104
O23138	O23138	Cytochrome c-1	CYTC-1	sp|O23138|CYC1_ARATH Cytochrome c-1 OS=Arabidopsis thaliana GN=CYTC-1 PE=1 SV=1	1	17.1286	17.1436	17.1799	17.1527	17.2646	17.0118	16.9534	17.1771	17.7535	18.0613	17.9422	18.0987	17.1949	17.129	17.4444	17.2209	17.1828	17.0398	17.0154	17.1463	17.1905	17.0918	17.0256	17.4524	17.4201	17.3852	17.297	16.9839	16.8909	16.9605	16.9357	6	58.8	12.394	114	0	55.193	16.9901	16.9981	17.016	16.9816	17.084	16.8659	16.8114
Q9FKC0	Q9FKC0	60S ribosomal protein L13a-4	RPL13AD	sp|Q9FKC0|R13A4_ARATH 60S ribosomal protein L13a-4 OS=Arabidopsis thaliana GN=RPL13AD PE=2 SV=1	1	18.3612	18.2665	18.3132	18.2672	18.301	18.2307	18.3228	18.2796	18.199	18.0497	18.1578	18.0162	18.2062	18.2136	18.2647	18.2276	17.9768	17.9524	17.9912	18.0205	17.9587	17.9385	17.9792	17.9393	17.8904	17.8903	17.9562	17.834	17.7865	17.9331	17.7751	19	58.7	23.59	206	0	20.558	18.5565	18.4547	18.4831	18.4299	18.4541	18.4186	18.5145
Q9FMT1	Q9FMT1	3-isopropylmalate dehydrogenase 3, chloroplastic	IMDH3	sp|Q9FMT1|LEU33_ARATH 3-isopropylmalate dehydrogenase 3, chloroplastic OS=Arabidopsis thaliana GN=IMDH3 PE=1 SV=1	1	18.8802	18.8855	18.8954	18.849	18.7024	18.7346	18.7659	18.7907	18.5965	18.4572	18.5806	18.6274	18.8003	18.8021	18.8069	18.9512	18.8971	18.7583	18.5862	19.049	19.0262	19.1502	19.2037	18.7074	18.627	18.5735	18.5016	19.2549	19.2448	19.0485	19.1333	18	58.7	44.161	409	0	274.24	19.2774	19.2757	19.2672	19.2136	19.0574	19.1244	19.1595
Q9FF90;REV__O50039;REV__Q9LFJ5	Q9FF90	60S ribosomal protein L13-3	RPL13D	sp|Q9FF90|RL133_ARATH 60S ribosomal protein L13-3 OS=Arabidopsis thaliana GN=RPL13D PE=1 SV=1	3	18.3755	18.3633	18.3179	18.3055	18.3156	18.3293	18.3211	18.2934	18.2289	18.1849	18.2804	18.2346	18.2181	18.2551	18.3168	18.3095	17.9138	17.9035	17.8995	17.6646	17.6406	17.7266	17.7507	17.9701	17.9424	17.9018	17.9169	17.8912	17.7583	17.9419	17.7199	15	58.7	23.485	206	0	205.52	18.4116	18.3924	18.3286	18.309	18.3095	18.3581	18.3537
Q9LTF2	Q9LTF2	40S ribosomal protein S10-3	RPS10C	sp|Q9LTF2|RS103_ARATH 40S ribosomal protein S10-3 OS=Arabidopsis thaliana GN=RPS10C PE=2 SV=2	1	18.6338	18.5219	18.5399	18.525	18.5206	18.3728	18.5041	18.5103	18.4187	18.3767	18.4407	18.3727	18.377	18.3903	18.6063	18.4366	18.146	18.067	18.1198	18.2919	18.0449	18.1088	18.058	18.3131	18.2155	18.2295	18.0895	18.0069	17.8394	17.887	17.698	12	58.7	19.551	179	0	30.21	18.3951	18.2761	18.2757	18.2536	18.2397	18.1267	18.2618
Q8LAH7;P0DI09;P0DI08	Q8LAH7	12-oxophytodienoate reductase 1	OPR1	sp|Q8LAH7|OPR1_ARATH 12-oxophytodienoate reductase 1 OS=Arabidopsis thaliana GN=OPR1 PE=1 SV=2	3	17.2426	17.2738	17.2967	17.2207	17.2469	17.268	17.3969	17.3033	17.7967	17.8144	17.8169	17.8289	17.3076	17.2072	17.236	17.2966	17.2644	17.2716	17.2432	17.2986	17.4412	17.3005	17.3134	17.1889	17.1055	17.1673	17.2519	17.2355	17.3564	17.254	17.194	19	58.6	41.167	372	0	89.928	17.1491	17.1732	17.1778	17.0946	17.1112	17.167	17.2997
Q9LYA9	Q9LYA9	Chloroplast stem-loop binding protein of 41 kDa a, chloroplastic	CSP41A	sp|Q9LYA9|CP41A_ARATH Chloroplast stem-loop binding protein of 41 kDa a, chloroplastic OS=Arabidopsis thaliana GN=CSP41A PE=1 SV=1	1	19.2188	19.0133	19.1725	19.2904	19.0413	19.3767	19.1135	19.2692	19.0394	19.2489	19.3946	19.3929	19.444	19.4651	19.3422	19.2202	19.1072	19.2411	19.3832	19.4171	19.573	19.4614	19.3998	19.4771	19.3032	19.2535	19.688	20.0067	19.9155	19.5985	19.645	19	58.6	43.929	406	0	323.31	19.3682	19.1556	19.2965	19.4072	19.1485	19.5187	19.2592
Q9SHC8	Q9SHC8	Vesicle-associated protein 1-2;Vesicle-associated protein 1-2, N-terminally processed	PVA12	sp|Q9SHC8|VAP12_ARATH Vesicle-associated protein 1-2 OS=Arabidopsis thaliana GN=PVA12 PE=1 SV=1	1	17.8195	17.9369	17.8376	17.8051	18.0101	18.0379	17.9154	17.9158	18.0886	18.2837	18.1588	18.2512	17.9612	17.9272	17.944	17.9028	17.858	17.8107	17.7775	17.7609	17.7932	17.7884	17.7104	18.1894	18.2403	18.1898	18.147	17.8383	17.7432	17.7251	17.8087	13	58.6	26.442	239	0	131.17	17.7749	17.8852	17.7676	17.7279	17.9233	17.9859	17.8672
O49553	O49553		F7J7.50	tr|O49553|O49553_ARATH AT4g21110/F7J7_50 OS=Arabidopsis thaliana GN=F7J7.50 PE=2 SV=1	1	16.003	15.9907	16.0858	16.2715	16.0775	16.0825	16.0615	16.2413	16.1282	16.2059	16.2276	16.3382	16.072	16.0298	16.0806	16.0964	16.0318	16.1638	16.2995	16.1904	16.1748	16.211	16.1028	16.0431	16.0767	16.1279	16.1352	15.7046	15.9288	16.2541	15.8912	8	58.6	17.187	145	0	34.902	16.1294	16.1101	16.1868	16.3653	16.1618	16.2015	16.1844
Q96242	Q96242	Allene oxide synthase, chloroplastic	CYP74A	sp|Q96242|CP74A_ARATH Allene oxide synthase, chloroplastic OS=Arabidopsis thaliana GN=CYP74A PE=1 SV=3	1	18.9349	19.065	19.0804	19.0512	19.1905	19.0955	18.9543	18.9931	19.2011	19.3991	19.2515	19.3632	19.1362	19.1534	19.3157	19.2268	19.4619	19.504	19.2495	19.0983	19.215	19.3793	19.2938	19.1507	19.2387	19.0249	19.0802	19.2463	19.0571	19.2887	19.15	23	58.5	58.196	518	0	289.08	18.9816	19.1047	19.1018	19.0653	19.1951	19.1348	18.9975
P82281	P82281	Thylakoid lumenal 29 kDa protein, chloroplastic	TL29	sp|P82281|TL29_ARATH Thylakoid lumenal 29 kDa protein, chloroplastic OS=Arabidopsis thaliana GN=TL29 PE=1 SV=2	1	18.2506	18.4074	18.2997	18.5871	18.4243	18.3471	18.3522	18.2073	18.9303	19.2109	18.967	18.9019	18.7617	18.7187	18.4984	18.6089	19.0532	19.055	19.1798	18.5228	18.7572	18.816	18.8082	19.0493	19.0282	18.6211	18.7567	19.162	19.4698	19.4735	19.1799	19	58.5	37.934	349	0	323.31	18.0445	18.1944	18.0682	18.3484	18.1761	18.1336	18.1426
P56793;Q84WZ8	P56793	50S ribosomal protein L16, chloroplastic	rpl16	sp|P56793|RK16_ARATH 50S ribosomal protein L16, chloroplastic OS=Arabidopsis thaliana GN=rpl16 PE=3 SV=1	2	19.2821	19.2084	19.2978	19.404	19.1889	19.1273	19.0849	19.2714	19.3944	19.2927	19.4331	19.3575	19.2514	19.3723	19.3093	19.2197	19.333	19.3276	19.4298	19.4177	19.2937	19.3548	19.2075	19.1547	19.1327	19.1478	19.2156	19.0122	19.2195	19.2619	19.1453	9	58.5	15.294	135	0	126.6	19.3668	19.286	19.357	19.456	19.2314	19.2045	19.166
Q8LGE7	Q8LGE7	NADH dehydrogenase [ubiquinone] 1 alpha subcomplex subunit 8-B		sp|Q8LGE7|NDA8B_ARATH NADH dehydrogenase [ubiquinone] 1 alpha subcomplex subunit 8-B OS=Arabidopsis thaliana GN=At5g18800 PE=1 SV=1	1	16.4316	16.5879	16.5993	16.8017	16.7625	16.6075	16.5223	16.6547	17.3363	17.5996	17.4596	17.72	16.9307	17.0819	16.982	16.8812	16.6134	16.5208	16.7489	16.7759	17.0064	16.8832	16.6684	17.6498	17.539	17.2672	17.3511	16.7709	16.6131	16.733	16.66	7	58.5	11.968	106	0	7.5701	16.8054	16.9546	16.9476	17.1428	17.094	16.9739	16.8925
Q9ZW80;Q38913;Q9FS16	Q9ZW80;Q38913;Q9FS16	Extensin-1;Extensin-3	At2g43150;EXT1;EXT3	tr|Q9ZW80|Q9ZW80_ARATH Proline-rich extensin-like family protein OS=Arabidopsis thaliana GN=At2g43150 PE=4 SV=1;sp|Q38913|EXTN1_ARATH Extensin-1 OS=Arabidopsis thaliana GN=EXT1 PE=2 SV=2;sp|Q9FS16|EXTN3_ARATH Extensin-3 OS=Arabidopsis thaliana GN=EXT3 PE=2	3	13.2506	13.4402	13.2697	13.2497	13.8881	13.9902	13.7707	13.4262	13.3986	13.4613	13.6293	13.6263	13.1609	13.1852	13.3822	13.387	13.414	13.5008	13.3034	13.04	12.9866	12.7543	13.0661	13.4034	13.3959	13.5796	13.2519	13.2187	12.7633	13.2635	13.09	2	58.5	23.429	212	0	6.4093	14.6612	14.8437	14.6549	14.6276	15.2565	15.3934	15.1777
Q9SE83	Q9SE83	Dynamin-2A	DRP2A	sp|Q9SE83|DRP2A_ARATH Dynamin-2A OS=Arabidopsis thaliana GN=DRP2A PE=1 SV=2	1	18.9782	18.9908	19.0229	18.9013	19.0702	19.1524	19.0899	19.0423	19.1567	19.1612	19.1694	19.1519	18.9011	18.8544	19.006	18.8581	18.891	18.9109	18.9929	18.8319	18.7186	18.7784	18.7617	18.8915	18.942	19.0566	18.8917	18.6596	18.7016	18.7378	18.6218	53	58.4	99.165	914	0	323.31	18.5077	18.5132	18.5269	18.3981	18.5574	18.6744	18.6158
Q9LD90	Q9LD90	H/ACA ribonucleoprotein complex subunit 4	CBF5	sp|Q9LD90|CBF5_ARATH H/ACA ribonucleoprotein complex subunit 4 OS=Arabidopsis thaliana GN=CBF5 PE=1 SV=1	1	19.3593	19.0976	19.3074	19.2045	19.3946	19.5035	19.3934	19.3743	19.6275	19.5773	19.5649	19.7316	19.2804	19.109	19.2762	19.1811	19.2575	19.4604	19.2963	19.1535	19.0813	19.1752	19.2062	19.0792	19.0757	19.111	18.9957	18.9727	18.9581	19.0883	19.0164	31	58.4	63.026	565	0	323.31	19.329	19.0603	19.2517	19.1416	19.3222	19.4658	19.3596
O24457	O24457	Pyruvate dehydrogenase E1 component subunit alpha-3, chloroplastic	PDH-E1 ALPHA	sp|O24457|ODPA3_ARATH Pyruvate dehydrogenase E1 component subunit alpha-3, chloroplastic OS=Arabidopsis thaliana GN=PDH-E1 ALPHA PE=2 SV=1	1	19.3128	19.347	19.41	19.7512	19.1821	19.0715	19.1634	19.2851	19.9235	20.2433	20.281	20.2932	19.7094	19.887	19.5852	19.6878	19.5174	19.5709	19.8575	19.8222	19.6915	19.8763	19.6577	20.0982	20.1121	20.0536	20.2271	19.5261	19.7324	19.8153	19.6514	27	58.4	47.173	428	0	323.31	19.0784	19.1054	19.1501	19.484	18.9055	18.8296	18.9253
Q9FNN1	Q9FNN1	Pyruvate kinase	At5g08570	tr|Q9FNN1|Q9FNN1_ARATH Pyruvate kinase OS=Arabidopsis thaliana GN=At5g08570 PE=2 SV=1	1	18.8723	18.7305	18.7266	18.5287	18.7148	18.6712	18.8563	18.6893	18.4397	18.3864	18.4526	18.4087	18.4976	18.5999	18.6158	18.636	18.5141	18.4187	18.2773	18.623	18.5293	18.4797	18.5718	18.184	18.1702	18.266	18.2242	18.8404	18.6719	18.6913	18.8103	24	58.4	54.976	510	0	224.66	19.1778	19.029	19.0067	18.8016	18.9782	18.9693	19.1582
Q93W22	Q93W22	60S ribosomal protein L10-3	RPL10C	sp|Q93W22|RL103_ARATH 60S ribosomal protein L10-3 OS=Arabidopsis thaliana GN=RPL10C PE=2 SV=1	1	20.9667	20.9233	20.8632	20.7901	20.8102	20.7825	20.8917	20.8921	20.6993	20.7109	20.8117	20.7652	20.7247	20.7818	20.8401	20.7461	20.5064	20.6263	20.7453	20.7766	20.6767	20.6316	20.6404	20.6974	20.7459	20.7479	20.8281	20.3611	20.4551	20.5322	20.3442	18	58.4	24.929	221	0	238.16	20.7842	20.7337	20.6553	20.575	20.5855	20.5926	20.7056
P32961	P32961	Nitrilase 1	NIT1	sp|P32961|NRL1_ARATH Nitrilase 1 OS=Arabidopsis thaliana GN=NIT1 PE=1 SV=2	1	20.2755	20.3125	20.1895	19.9667	20.2499	20.0892	20.2623	20.1065	20.204	20.5541	20.4565	20.4519	19.9437	20.0862	20.1748	20.2863	19.6711	19.6064	19.4905	20.2531	20.0017	20.0956	20.1008	19.8591	19.8279	20.0064	19.7192	20.0171	19.9807	19.8161	20.0821	17	58.4	38.152	346	0	323.31	20.573	20.603	20.4616	20.2316	20.5052	20.3793	20.5563
Q8L7K0	Q8L7K0	60S ribosomal protein L18a-1	RPL18AA	sp|Q8L7K0|R18A1_ARATH 60S ribosomal protein L18a-1 OS=Arabidopsis thaliana GN=RPL18AA PE=2 SV=1	1	17.4204	17.3546	17.3777	17.3114	17.3942	17.3462	17.4048	17.3451	17.1573	17.1099	17.1631	17.1004	17.1849	17.24	17.3726	17.2934	17.1914	17.2454	17.2595	16.8388	16.7234	16.8031	16.8268	17.0786	17.1403	17.1362	17.0608	16.9556	16.9383	17.0547	16.9457	12	58.4	21.284	178	0	56.929	17.445	17.3722	17.377	17.3034	17.3767	17.3634	17.4259
O65202	O65202	Peroxisomal acyl-coenzyme A oxidase 1	ACX1	sp|O65202|ACOX1_ARATH Peroxisomal acyl-coenzyme A oxidase 1 OS=Arabidopsis thaliana GN=ACX1 PE=1 SV=1	1	19.8879	19.776	19.8279	19.5753	19.7993	19.6809	20.0331	19.7719	19.9286	20.1036	20.0047	20.0875	19.5061	19.4405	19.6422	19.5475	19.6338	19.6078	19.7089	19.6242	19.4394	19.5298	19.584	19.4034	19.4636	19.6803	19.4061	19.4785	19.4028	19.2462	19.5325	36	58.3	74.301	664	0	323.31	19.9306	19.8117	19.8452	19.5854	19.7998	19.7162	20.0722
P22954;Q9C7X7	P22954;Q9C7X7	Probable mediator of RNA polymerase II transcription subunit 37c;Heat shock 70 kDa protein 18	MED37D;HSP70-18	sp|P22954|MD37D_ARATH Probable mediator of RNA polymerase II transcription subunit 37c OS=Arabidopsis thaliana GN=MED37D PE=1 SV=2;sp|Q9C7X7|HSP7N_ARATH Heat shock 70 kDa protein 18 OS=Arabidopsis thaliana GN=HSP70-18 PE=2 SV=1	2	17.2468	17.3686	17.2907	17.2729	18.4877	18.6636	18.523	18.2993	17.0339	17.187	17.1514	17.2011	17.2305	17.2969	17.289	17.3008	17.2873	17.2176	17.1708	17.631	17.627	17.6761	17.6742	17.5059	17.5969	17.5111	17.524	17.7362	17.6147	17.5897	17.6784	34	58.3	71.386	653	0	159.54	17.6181	17.7328	17.6366	17.6115	18.8168	19.0275	18.8907
Q9SJ12	Q9SJ12	Probable ATP synthase 24 kDa subunit, mitochondrial		sp|Q9SJ12|ATP7_ARATH Probable ATP synthase 24 kDa subunit, mitochondrial OS=Arabidopsis thaliana GN=At2g21870 PE=1 SV=1	1	19.1312	19.0314	18.9744	19.1873	19.1392	19.0175	18.934	19.0245	19.6752	19.9673	19.8154	19.9695	19.2827	19.4132	19.3963	19.1897	19.1489	19.0574	19.2303	19.2045	19.4285	19.2995	19.1628	20.0688	20.0748	19.7437	19.8654	19.1742	19.0171	19.1284	19.0823	17	58.3	27.597	240	0	225.18	19.1799	19.0731	18.9977	19.2033	19.1457	19.0588	18.9791
F4IZU3	F4IZU3		UNE6	tr|F4IZU3|F4IZU3_ARATH LUC7 related protein OS=Arabidopsis thaliana GN=UNE6 PE=4 SV=1	1	19.3527	19.2673	19.3528	19.366	19.3008	19.2594	19.3129	19.3627	19.2268	19.2383	19.2583	19.2578	19.2247	19.3302	19.4107	19.4041	19.0506	19.0369	19.0705	19.2811	19.0981	19.1739	19.1674	18.9513	18.9129	18.9774	18.941	18.94	18.885	19.0351	18.8233	27	58.2	47.355	402	0	312.87	19.1169	19.0244	19.0915	19.0975	19.0227	19.0161	19.0735
Q8H0U5	Q8H0U5	Protein TIC 62, chloroplastic	TIC62	sp|Q8H0U5|TIC62_ARATH Protein TIC 62, chloroplastic OS=Arabidopsis thaliana GN=TIC62 PE=1 SV=1	1	18.4969	18.6835	18.6834	18.767	18.6512	18.6441	18.5476	18.5782	19.0904	19.3997	19.2385	19.3957	18.9382	18.9199	18.8701	18.7361	19.082	19.0592	19.0006	18.6763	18.8934	18.798	18.7256	19.2731	19.2021	19.032	19.1745	19.0471	18.894	18.9748	18.9221	27	58.2	68.341	641	0	255.43	18.6137	18.7934	18.7748	18.8513	18.7259	18.7536	18.6609
Q93YZ7	Q93YZ7	Acetolactate synthase small subunit 2, chloroplastic		sp|Q93YZ7|ILVH2_ARATH Acetolactate synthase small subunit 2, chloroplastic OS=Arabidopsis thaliana GN=At2g31810 PE=1 SV=1	1	19.3745	19.336	19.4807	19.5434	19.3445	19.191	19.1849	19.3632	19.589	19.5089	19.4839	19.4577	19.4686	19.4985	19.4617	19.4805	19.33	19.4111	19.5252	19.5163	19.3887	19.6121	19.4613	19.3275	19.326	19.4355	19.335	19.2484	19.3869	19.4842	19.4574	27	58.2	53.872	491	0	323.31	19.4376	19.3921	19.5184	19.5739	19.3655	19.2468	19.2445
Q9XGM1	Q9XGM1	V-type proton ATPase subunit D	VHA-D	sp|Q9XGM1|VATD_ARATH V-type proton ATPase subunit D OS=Arabidopsis thaliana GN=VHA-D PE=1 SV=2	1	19.4688	19.4914	19.4418	19.3978	19.4516	19.4333	19.3888	19.4148	19.3306	19.432	19.3926	19.4794	19.494	19.4765	19.5081	19.4773	19.4623	19.4253	19.2969	19.4499	19.4351	19.3759	19.4346	19.8645	19.876	19.9321	19.8249	19.5333	19.4973	19.4743	19.5173	21	58.2	29.058	261	0	131.04	19.4158	19.4314	19.3634	19.3121	19.3564	19.3729	19.3323
Q93VT9	Q93VT9	60S ribosomal protein L10-1	RPL10A	sp|Q93VT9|RL101_ARATH 60S ribosomal protein L10-1 OS=Arabidopsis thaliana GN=RPL10A PE=1 SV=1	1	18.1231	18.0111	18.0192	18.0271	18.0028	17.974	18.0555	18.0563	17.9612	18.0454	18.01	18.0061	17.9139	17.9807	18.0563	17.9948	17.9268	17.9501	18.0864	17.9651	17.8983	17.8829	17.8336	17.9412	17.9758	17.9926	18.0954	17.806	17.8456	17.7913	17.7307	17	58.2	24.917	220	0	49.542	18.5293	18.4103	18.4	18.4007	18.3669	18.3728	18.4582
Q96283	Q96283	Ras-related protein RABA2c	RABA2C	sp|Q96283|RAA2C_ARATH Ras-related protein RABA2c OS=Arabidopsis thaliana GN=RABA2C PE=2 SV=4	1	17.1253	17.1276	17.0545	16.9989	17.1025	17.0802	17.0776	17.1076	17.1098	17.2057	17.1534	17.106	17.1186	17.037	17.0275	17.0683	17.0832	17.0015	16.9314	16.9905	17.0546	16.9396	16.9055	17.5918	17.6793	17.5867	17.5052	17.1254	16.7509	16.9186	17.0485	10	58.1	23.849	217	0	148.48	16.4326	16.428	16.3364	16.2736	16.3677	16.3801	16.3814
Q93WK6	Q93WK6		At1g19530	tr|Q93WK6|Q93WK6_ARATH Putative uncharacterized protein At1g19530 OS=Arabidopsis thaliana GN=At1g19530 PE=2 SV=1	1	16.4912	16.9688	16.6272	16.7	16.345	16.2542	16.175	16.3397	16.7284	16.6874	16.7856	16.9658	17.0686	16.8855	16.7049	16.8312	16.6801	16.6147	16.7477	16.6483	17.0285	16.5583	16.7215	17.4688	17.5289	17.2918	17.1463	16.7075	16.6756	17.1766	16.9377	7	58.1	13.656	117	0	141.93	16.2899	16.7605	16.4004	16.466	16.1015	16.0455	15.9701
Q1H595	Q1H595	Sm-like protein LSM2	LSM2	sp|Q1H595|LSM2_ARATH Sm-like protein LSM2 OS=Arabidopsis thaliana GN=LSM2 PE=1 SV=1	1	17.2223	17.1131	17.2056	17.1475	17.0166	16.9844	17.0703	17.1055	16.8425	16.5904	16.6813	16.494	17.0797	17.0956	17.1314	17.191	16.9842	17.0321	17.0886	17.2279	17.1222	17.0959	17.1829	16.8913	16.7982	16.979	16.9566	16.8979	16.9816	16.942	16.9785	5	58.1	10.694	93	0	71.432	17.2515	17.1352	17.2093	17.1441	17.0036	17.0061	17.0959
Q9LV03	Q9LV03	Glutamate synthase 1 [NADH], chloroplastic	GLT1	sp|Q9LV03|GLUT1_ARATH Glutamate synthase 1 [NADH], chloroplastic OS=Arabidopsis thaliana GN=GLT1 PE=2 SV=2	1	21.3221	21.369	21.2476	21.3497	21.3045	21.381	21.24	21.2469	21.0488	20.6329	20.6607	20.7697	21.3373	21.2289	21.2147	21.3438	21.4321	21.3457	21.2354	21.3732	21.3907	21.4282	21.3536	21.2316	21.2203	21.3393	21.1314	21.186	21.3326	21.3502	21.3247	109	58	241.9	2208	0	323.31	21.3768	21.4166	21.2769	21.3718	21.3171	21.4283	21.2911
F4IYF8	F4IYF8		At3g02760	sp|F4IYF8|SYHC_ARATH Histidine--tRNA ligase, cytoplasmic OS=Arabidopsis thaliana GN=At3g02760 PE=2 SV=1	1	20.297	20.2388	20.1022	19.9869	20.179	20.2595	20.2439	20.0698	19.9256	19.7412	19.761	19.6551	20.1163	19.9853	19.9425	20.0192	19.9772	19.8752	19.9366	20.036	19.9859	20.0091	20.1793	19.5626	19.5627	19.5807	19.6083	20.1238	20.2514	20.0503	20.2279	47	58	97.536	883	0	323.31	20.4961	20.4308	20.2758	20.1534	20.3359	20.4511	20.4394
Q8H1Y0	Q8H1Y0	Pyruvate dehydrogenase E1 component subunit alpha-2, mitochondrial	IAR4	sp|Q8H1Y0|ODPA2_ARATH Pyruvate dehydrogenase E1 component subunit alpha-2, mitochondrial OS=Arabidopsis thaliana GN=IAR4 PE=1 SV=2	1	19.252	19.3325	19.4116	19.3864	19.6942	19.6	19.4521	19.4908	19.5664	19.7927	19.8231	19.7945	19.492	19.3341	19.497	19.4348	19.2876	19.3497	19.3093	19.556	19.5103	19.4129	19.4883	19.6353	19.7585	19.7919	19.6052	19.3194	19.3934	19.1757	19.3807	24	58	43.358	393	0	323.31	19.2333	19.3067	19.3674	19.3351	19.6333	19.5738	19.4298
Q9C9D0	Q9C9D0	Cytosolic sulfotransferase 16	SOT16	sp|Q9C9D0|SOT16_ARATH Cytosolic sulfotransferase 16 OS=Arabidopsis thaliana GN=SOT16 PE=1 SV=1	1	19.2254	19.2313	19.0454	18.8034	19.3622	19.3596	19.5808	19.2634	18.5802	18.4935	18.6083	18.7328	18.7328	18.7307	18.8814	18.8317	18.9068	18.5974	18.439	18.5149	18.6128	18.5878	18.5374	18.5557	18.603	18.6822	18.5131	19.1023	18.9043	18.5605	18.7821	19	58	39.219	338	0	315.79	19.3782	19.377	19.1727	18.9235	19.4728	19.505	19.73
Q9FKA4	Q9FKA4	Peroxidase 62	PER62	sp|Q9FKA4|PER62_ARATH Peroxidase 62 OS=Arabidopsis thaliana GN=PER62 PE=2 SV=1	1	16.9382	16.9665	17.0357	17.1174	17.8295	17.7193	17.8362	17.7588	17.2964	17.5909	17.5708	17.2659	16.8447	16.9813	17.0997	17.0235	17.2709	17.2953	17.2606	17.0471	16.8868	17.0804	16.8446	16.9128	17.0232	17.5155	17.0233	16.8419	16.9154	16.8056	16.8001	12	58	34.133	319	0	323.31	17.2106	17.2318	17.2826	17.3572	18.0597	17.9842	18.105
Q9M060;O22290	Q9M060	Eukaryotic translation initiation factor 6-2	EIF6-2	sp|Q9M060|IF62_ARATH Eukaryotic translation initiation factor 6-2 OS=Arabidopsis thaliana GN=EIF6-2 PE=2 SV=1	2	18.2481	18.3241	18.3521	18.3344	18.4802	18.4486	18.4191	18.5349	18.4719	18.4684	18.504	18.641	18.2164	18.12	18.2792	18.3021	17.9673	18.2438	18.1188	18.3475	18.1753	18.3099	18.234	17.9668	18.0114	18.0479	17.9631	17.6396	17.7052	18.048	17.6975	12	58	26.482	245	0	323.31	18.6379	18.7068	18.7165	18.6916	18.8279	18.831	18.8053
O23676	O23676	Protein mago nashi homolog		sp|O23676|MGN_ARATH Protein mago nashi homolog OS=Arabidopsis thaliana GN=At1g02140 PE=1 SV=1	1	18.0205	17.9685	17.9347	17.8252	18.0643	18.0159	18.0455	18.0179	17.8931	18.0486	18.0268	18.1203	17.8349	17.8505	17.9635	17.8948	17.788	17.8072	17.7816	17.8594	17.8725	17.8503	17.8701	17.7896	17.7879	17.8321	17.7982	17.8402	17.822	17.9145	17.8642	11	58	17.458	150	0	111.07	18.0559	17.9969	17.9447	17.828	18.0575	18.0439	18.0773
Q43127	Q43127	Glutamine synthetase, chloroplastic/mitochondrial	GLN2	sp|Q43127|GLNA2_ARATH Glutamine synthetase, chloroplastic/mitochondrial OS=Arabidopsis thaliana GN=GLN2 PE=1 SV=1	1	20.0665	20.1649	19.9085	20.1465	20.1177	20.3262	20.2899	20.1805	19.8738	19.536	19.671	19.7166	20.239	20.2404	19.9914	20.226	20.1586	20.1502	20.0246	20.283	20.4004	20.3999	20.4075	20.3743	20.213	20.2429	20.2852	20.5966	20.629	20.5298	20.5407	26	57.9	47.41	430	0	323.31	20.2459	20.3372	20.0624	20.2932	20.2549	20.4981	20.4656
Q8VYB2	Q8VYB2	Uridine kinase-like protein 3;Uridine kinase;Putative uracil phosphoribosyltransferase	UKL3	sp|Q8VYB2|UKL3_ARATH Uridine kinase-like protein 3 OS=Arabidopsis thaliana GN=UKL3 PE=2 SV=1	1	18.6572	18.1305	18.0345	18.3311	17.955	17.7821	17.7726	17.964	18.2118	18.2998	18.2325	18.3549	18.1392	18.2493	18.0973	18.2269	18.0709	17.9719	18.0251	18.152	18.048	18.1595	18.078	18.2522	18.1508	18.3658	18.1687	17.7368	17.9675	18.1514	18.013	22	57.9	52.442	466	0	192.27	18.5321	17.9983	17.8839	18.1733	17.7876	17.6496	17.6439
O65390	O65390	Aspartic proteinase A1	APA1	sp|O65390|APA1_ARATH Aspartic proteinase A1 OS=Arabidopsis thaliana GN=APA1 PE=1 SV=1	1	20.0737	20.0269	20.0679	20.0133	20.0686	19.9789	20.0951	20.085	20.1362	20.2979	20.2354	20.2348	20.0758	20.0398	20.1418	20.0232	20.0326	20.0762	20.0809	20.2671	20.1876	20.0783	20.1572	20.1898	20.1816	20.2444	20.1543	20.1934	20.1851	20.1635	20.2264	19	57.9	54.613	506	0	323.31	19.7066	19.6528	19.6754	19.6136	19.6594	19.6044	19.7245
Q9SKX4	Q9SKX4	50S ribosomal protein L3-1, chloroplastic	RPL3A	sp|Q9SKX4|RK3A_ARATH 50S ribosomal protein L3-1, chloroplastic OS=Arabidopsis thaliana GN=RPL3A PE=2 SV=1	1	20.3263	20.2457	20.3725	20.5467	20.3154	20.2723	20.1578	20.3829	20.5191	20.3896	20.5261	20.4288	20.3856	20.4788	20.3463	20.312	20.47	20.5472	20.6905	20.5893	20.4851	20.5363	20.3988	20.3011	20.3783	20.3803	20.4079	20.2738	20.4513	20.5444	20.4315	17	57.9	29.363	271	0	323.31	20.6331	20.5455	20.6539	20.8209	20.58	20.5717	20.461
Q8LEM8;Q43292	Q8LEM8;Q43292	60S ribosomal protein L37-3;60S ribosomal protein L37-2	RPL37C;RPL37B	sp|Q8LEM8|RL373_ARATH 60S ribosomal protein L37-3 OS=Arabidopsis thaliana GN=RPL37C PE=3 SV=1;sp|Q43292|RL372_ARATH 60S ribosomal protein L37-2 OS=Arabidopsis thaliana GN=RPL37B PE=3 SV=2	2	19.6591	19.6294	19.5939	19.5645	19.5868	19.4859	19.5881	19.6194	19.3892	19.3394	19.4524	19.4323	19.5731	19.5353	19.5339	19.4774	19.3368	19.3789	19.4119	19.3947	19.2951	19.241	19.2624	19.3464	19.2999	19.2872	19.3486	19.141	19.1305	19.225	18.9651	11	57.9	10.771	95	0	23.664	19.8035	19.7667	19.7128	19.6762	19.6889	19.6228	19.7288
F4IWV2	F4IWV2		At3g55410	tr|F4IWV2|F4IWV2_ARATH 2-oxoglutarate dehydrogenase, E1 component OS=Arabidopsis thaliana GN=At3g55410 PE=4 SV=1	1	20.3148	20.4607	20.5139	20.5778	20.6674	20.5892	20.64	20.6537	20.7869	21.1113	21.0321	21.0043	20.5499	20.5208	20.6247	20.488	20.431	20.5717	20.7251	20.7419	20.6943	20.6955	20.6814	20.7835	20.7946	20.9062	20.752	20.4126	20.4265	20.408	20.4791	58	57.8	115.16	1017	0	323.31	20.1009	20.2397	20.2745	20.3312	20.4112	20.3678	20.4224
Q56Z59	Q56Z59	Patellin-3	PATL3	sp|Q56Z59|PATL3_ARATH Patellin-3 OS=Arabidopsis thaliana GN=PATL3 PE=1 SV=2	1	19.2916	19.3521	19.2218	19.224	19.4008	19.2643	19.29	19.3411	19.1255	19.184	19.2111	19.1014	19.4485	19.2988	19.1798	19.3341	19.2653	19.0883	19.121	19.3407	19.4301	19.4886	19.4908	19.4366	19.4582	19.3738	19.4967	19.5326	19.5444	19.49	19.7099	26	57.8	56.104	490	0	323.31	19.5873	19.6408	19.4921	19.4871	19.6543	19.5526	19.5822
P48523	P48523	Cinnamyl alcohol dehydrogenase 4	CAD4	sp|P48523|CADH4_ARATH Cinnamyl alcohol dehydrogenase 4 OS=Arabidopsis thaliana GN=CAD4 PE=1 SV=1	1	18.6488	18.5534	18.4689	18.3734	18.2818	18.427	18.4572	18.4289	18.2862	17.6339	17.6514	17.706	18.4338	18.2729	18.1388	18.4123	18.7227	18.503	18.376	18.5544	18.612	18.4571	18.6633	17.9669	18.0255	18.1313	18.0893	18.8318	18.848	18.833	18.8842	18	57.8	39.098	365	0	323.31	18.4396	18.3372	18.2343	18.1316	18.0304	18.2104	18.2445
Q9SN86	Q9SN86	Malate dehydrogenase, chloroplastic		sp|Q9SN86|MDHP_ARATH Malate dehydrogenase, chloroplastic OS=Arabidopsis thaliana GN=At3g47520 PE=1 SV=1	1	18.8263	18.803	18.7324	18.6332	18.748	18.8106	18.9086	18.7647	18.7609	18.8073	18.7581	18.8802	18.687	18.7111	18.7277	18.7148	18.7155	18.6393	18.6115	18.7317	18.7377	18.6901	18.7104	18.7782	18.7053	18.6809	18.7255	18.8925	18.8463	18.7236	18.8083	17	57.8	42.405	403	0	269.22	18.8013	18.7709	18.682	18.5756	18.6809	18.7783	18.88
O64700	O64700	Urease accessory protein G	UREG	sp|O64700|UREG_ARATH Urease accessory protein G OS=Arabidopsis thaliana GN=UREG PE=2 SV=1	1	17.8238	17.8873	17.8753	17.8522	17.7766	17.7509	17.7453	17.8304	17.7479	17.6433	17.758	17.663	17.7663	17.8535	17.8893	17.8328	17.8569	17.9454	17.9807	17.8418	17.8981	17.9067	17.9004	17.7635	17.7679	17.804	17.8829	17.7339	17.811	18.0002	17.8305	13	57.8	30.082	275	0	161.95	17.9006	17.9571	17.9267	17.8964	17.8112	17.8203	17.8185
Q9FXB0	Q9FXB0		F25P12.97	tr|Q9FXB0|Q9FXB0_ARATH At1g56580/F25P12_18 OS=Arabidopsis thaliana GN=F25P12.97 PE=2 SV=1	1	18.2201	18.1445	17.974	17.5641	18.4909	18.3684	18.377	18.2075	17.9251	17.9397	17.7676	17.8241	18.191	18.008	18.0137	18.0897	18.111	17.9884	17.8983	18.0261	18.1303	18.1092	18.1456	18.3033	18.2354	18.1537	18.1566	18.2253	18.1319	18.1386	18.1629	11	57.8	18.406	166	0	72.576	18.009	17.9264	17.7375	17.3204	18.2377	18.1499	18.1624
Q9LUV2	Q9LUV2	Probable protein Pop3		sp|Q9LUV2|POP3_ARATH Probable protein Pop3 OS=Arabidopsis thaliana GN=At3g17210 PE=1 SV=1	1	15.3013	15.3992	15.163	15.2213	15.3825	15.6065	15.5709	15.2837	15.2863	15.289	15.1844	15.3485	15.4417	15.2983	15.1075	15.3594	15.1735	15.1376	14.9956	15.148	15.2623	15.2742	15.2626	15.3665	15.3572	15.2842	15.3563	15.3897	15.4826	15.1294	15.3675	5	57.8	12.184	109	0	25.299	15.5353	15.6261	15.3716	15.4227	15.5744	15.833	15.8014
Q8S8R1	Q8S8R1		At2g23120	tr|Q8S8R1|Q8S8R1_ARATH Expressed protein OS=Arabidopsis thaliana GN=At2g23120 PE=2 SV=1	1	13.6991	13.6645	13.5791	13.7033	13.5068	13.7491	13.8821	13.7507	14.2435	14.7014	14.675	14.8566	13.8041	13.9257	13.8664	13.9983	13.4251	13.589	13.4743	13.7616	13.6442	13.7985	13.835	14.3157	14.3448	14.4154	14.3338	13.2681	13.4011	13.3947	13.1519	2	57.8	8.4821	83	0	36.33	13.5872	13.5456	13.4418	13.5588	13.3527	13.6298	13.7666
Q9LYG3;Q9XGZ0	Q9LYG3	NADP-dependent malic enzyme 2	NADP-ME2	sp|Q9LYG3|MAOP2_ARATH NADP-dependent malic enzyme 2 OS=Arabidopsis thaliana GN=NADP-ME2 PE=1 SV=1	2	19.5591	19.6728	19.5387	19.3706	19.758	19.626	19.746	19.6486	19.3451	19.4132	19.3941	19.4695	19.3956	19.4135	19.5277	19.5432	19.4211	19.4196	19.2645	19.5885	19.5226	19.5085	19.5218	19.5504	19.5855	19.5512	19.4444	19.7807	19.7307	19.5216	19.6566	31	57.7	64.412	588	0	323.31	19.5175	19.6242	19.4717	19.2963	19.6742	19.577	19.7008
Q9LQR8	Q9LQR8	26S proteasome non-ATPase regulatory subunit 3 homolog B	RPN3B	sp|Q9LQR8|PSD3B_ARATH 26S proteasome non-ATPase regulatory subunit 3 homolog B OS=Arabidopsis thaliana GN=RPN3B PE=1 SV=2	1	17.6089	17.5856	17.6252	17.5956	17.6471	17.6114	17.67	17.5935	17.3385	17.2357	17.3185	17.2427	17.4583	17.553	17.5002	17.6226	17.4465	17.5375	17.4884	17.6964	17.6055	17.6176	17.6674	17.5037	17.5375	17.5961	17.5257	17.4987	17.453	17.6071	17.5782	28	57.7	55.591	487	0	138.62	17.5834	17.5531	17.5743	17.5375	17.5795	17.5785	17.641
Q9SK74	Q9SK74	Zinc finger CCCH domain-containing protein 21		sp|Q9SK74|C3H21_ARATH Zinc finger CCCH domain-containing protein 21 OS=Arabidopsis thaliana GN=At2g20280 PE=3 SV=1	1	18.5193	18.481	18.4597	18.5401	18.4745	18.444	18.4546	18.4639	18.741	18.6465	18.6348	18.7414	18.467	18.4647	18.4735	18.4927	18.594	18.5613	18.625	18.4482	18.4921	18.6458	18.5795	18.5112	18.598	18.5442	18.522	18.1998	18.3602	18.4652	18.3404	22	57.7	42.389	371	0	141.28	18.6573	18.612	18.5723	18.6456	18.5704	18.5746	18.5891
Q9SF53	Q9SF53	60S ribosomal protein L35-1	RPL35A	sp|Q9SF53|RL351_ARATH 60S ribosomal protein L35-1 OS=Arabidopsis thaliana GN=RPL35A PE=2 SV=1	1	19.862	19.8204	19.8065	19.7918	19.7279	19.707	19.7775	19.789	19.6663	19.6511	19.7026	19.7219	19.7217	19.735	19.8412	19.7563	19.6134	19.6234	19.6636	19.6308	19.5167	19.4955	19.5002	19.5448	19.5477	19.5454	19.6072	19.435	19.4453	19.4487	19.3023	12	57.7	14.285	123	0	42.237	19.7939	19.7453	19.713	19.6911	19.6176	19.6315	19.7058
Q9LZ41	Q9LZ41	60S ribosomal protein L35-4	RPL35D	sp|Q9LZ41|RL354_ARATH 60S ribosomal protein L35-4 OS=Arabidopsis thaliana GN=RPL35D PE=2 SV=1	1	15.5041	15.4494	15.4055	15.4659	15.3511	15.5827	15.4808	15.4641	15.3829	15.3304	15.3657	15.3887	15.3999	15.3514	15.6521	15.5376	15.1768	15.3509	15.3576	15.3111	15.0646	15.1983	15.1724	15.0545	15.1042	15.0941	15.178	14.9579	15.2707	15.1874	14.7862	11	57.7	14.331	123	0	18.318	16.6354	16.5736	16.5114	16.5645	16.4402	16.7066	16.6085
O64818	O64818	Uncharacterized protein At2g23090		sp|O64818|Y2309_ARATH Uncharacterized protein At2g23090 OS=Arabidopsis thaliana GN=At2g23090 PE=1 SV=1	1	16.2517	16.0947	16.1724	16.6305	16.0196	15.9317	16.0634	16.1667	16.4513	16.2545	16.2913	16.2343	16.0857	16.1968	16.1863	16.3168	16.4506	16.5234	16.7147	16.3934	16.3801	16.6557	16.6255	16.1654	16.2264	16.1423	16.4011	15.9316	16.1481	16.6675	16.0822	6	57.7	8.3758	78	0	8.0972	15.8644	15.7003	15.7596	16.2106	15.5901	15.537	15.6725
Q9LV35;Q9ZU34	Q9LV35			tr|Q9LV35|Q9LV35_ARATH WD40 domain-containing protein OS=Arabidopsis thaliana GN=At3g18060 PE=2 SV=1	2	19.3824	19.4545	19.4772	19.7316	19.2901	19.2271	19.1887	19.4262	19.4324	19.152	19.0903	19.1333	19.6083	19.5652	19.3544	19.5393	19.7568	19.6527	19.4501	19.5177	19.6104	19.5446	19.7123	18.9562	18.8805	18.9572	19.0219	19.7959	19.997	19.9011	19.9472	28	57.6	66.041	609	0	323.31	19.4924	19.5575	19.5618	19.809	19.358	19.3297	19.2951
Q9SF40	Q9SF40	60S ribosomal protein L4-1	RPL4A	sp|Q9SF40|RL4A_ARATH 60S ribosomal protein L4-1 OS=Arabidopsis thaliana GN=RPL4A PE=2 SV=1	1	22.0576	21.9837	21.9994	21.9889	21.9016	21.8853	21.9258	21.9666	21.8364	21.7969	21.8859	21.8404	21.8668	21.8995	21.9931	21.8982	21.7456	21.7579	21.8083	21.8172	21.6858	21.6968	21.6845	21.6955	21.6958	21.6926	21.6908	21.5894	21.5576	21.6287	21.4277	28	57.6	44.702	406	0	323.31	22.2075	22.1266	22.124	22.1063	22.0094	22.0278	22.0722
Q43870	Q43870	ATP sulfurylase 2	APS2	sp|Q43870|APS2_ARATH ATP sulfurylase 2 OS=Arabidopsis thaliana GN=APS2 PE=1 SV=1	1	18.4047	18.4645	18.4779	18.601	18.3357	18.3808	18.2798	18.4403	18.3252	18.0965	18.061	17.9773	18.5029	18.4437	18.3838	18.465	18.7114	18.7009	18.6543	18.5636	18.6545	18.6177	18.6594	18.1527	18.0821	18.1726	18.2367	18.5499	18.7155	18.7873	18.6195	26	57.6	53.638	476	0	239.68	18.3064	18.3593	18.3542	18.4702	18.1953	18.2751	18.178
O80503	O80503		At2g44640	tr|O80503|O80503_ARATH Expressed protein OS=Arabidopsis thaliana GN=At2g44640 PE=4 SV=2	1	18.7654	18.86	18.8696	18.9052	18.7354	18.7945	18.6732	18.752	19.1316	19.2669	19.2013	19.2417	18.9001	18.9712	18.9071	18.9096	19.1525	19.1589	19.2311	18.8327	18.99	19.0382	18.8815	19.4545	19.4885	19.4163	19.4312	19.1935	18.9836	19.0616	19.1628	21	57.6	49.83	451	0	323.31	19.0921	19.1797	19.1709	19.1993	19.0199	19.1138	18.9964
Q8L7C9	Q8L7C9	Glutathione S-transferase U20	GSTU20	sp|Q8L7C9|GSTUK_ARATH Glutathione S-transferase U20 OS=Arabidopsis thaliana GN=GSTU20 PE=1 SV=1	1	19.1241	19.1163	19.0616	18.9502	19.1697	19.25	19.2288	19.1309	19.1483	18.9161	18.8957	19.0741	19.2918	19.156	19.1498	19.2968	19.1656	19.1066	18.8566	19.1741	19.1843	19.2858	19.3101	19.3229	19.2376	19.1018	19.0354	19.2206	19.2871	19.1207	19.1119	21	57.6	25.006	217	0	119.69	19.0917	19.0768	19.0037	18.8851	19.0951	19.2102	19.1928
Q43349	Q43349	29 kDa ribonucleoprotein, chloroplastic	CP29A	sp|Q43349|CP29A_ARATH 29 kDa ribonucleoprotein, chloroplastic OS=Arabidopsis thaliana GN=CP29A PE=2 SV=2	1	19.2696	19.0784	19.2973	19.1505	18.6147	18.5126	18.5551	18.7254	19.1991	18.7994	18.7235	18.8106	19.1785	19.0423	19.1704	19.149	19.138	19.0803	19.0885	18.8671	18.7922	18.7903	18.6899	19.025	18.9906	19.0917	18.8817	18.2149	18.2407	18.3395	18.223	15	57.6	36.007	342	0	323.31	19.407	19.2088	19.4093	19.2553	18.7099	18.6426	18.689
O23680	O23680	Translocase of chloroplast 33, chloroplastic	TOC33	sp|O23680|TOC33_ARATH Translocase of chloroplast 33, chloroplastic OS=Arabidopsis thaliana GN=TOC33 PE=1 SV=1	1	18.137	18.1388	18.1292	18.0183	18.2493	18.2653	18.0982	18.1474	18.304	18.2561	18.2478	18.1822	18.146	18.1431	18.2442	18.0797	18.2111	18.2195	18.3187	18.0698	18.0961	18.0976	18.054	18.4038	18.5194	18.4628	18.4217	17.943	17.7113	17.9661	17.9865	14	57.6	32.925	297	0	106.84	17.8512	17.846	17.818	17.6999	17.9213	17.9721	17.8088
O04487	O04487	Probable elongation factor 1-gamma 1		sp|O04487|EF1G1_ARATH Probable elongation factor 1-gamma 1 OS=Arabidopsis thaliana GN=At1g09640 PE=2 SV=1	1	18.4695	18.476	18.3283	18.2097	18.4495	18.5461	18.5442	18.4312	18.0322	17.925	17.9025	17.9613	18.2672	18.287	18.2786	18.3384	18.3726	18.1546	17.9507	18.361	18.3645	18.3119	18.3714	18.0443	18.0546	18.0866	17.9818	18.5572	18.4822	18.2761	18.4876	20	57.5	46.66	414	0	148.24	18.4195	18.419	18.2529	18.1272	18.3574	18.4887	18.4907
Q9ZRW8;Q9M9F1	Q9ZRW8	Glutathione S-transferase U19	GSTU19	sp|Q9ZRW8|GSTUJ_ARATH Glutathione S-transferase U19 OS=Arabidopsis thaliana GN=GSTU19 PE=1 SV=1	2	17.8044	18.0002	17.7426	17.6942	17.9698	18.0969	18.202	17.9105	18.3514	18.4558	18.4027	18.5213	18.0899	17.7817	17.7639	17.9402	17.8419	17.7687	17.6726	17.8254	18.056	17.9103	17.8752	17.9692	17.9052	17.9944	17.9729	17.8722	17.9876	17.6257	17.7317	17	57.5	25.65	219	0	85.718	17.677	17.8657	17.5897	17.5342	17.8002	17.9621	18.071
Q9ZNZ7	Q9ZNZ7	Ferredoxin-dependent glutamate synthase 1, chloroplastic/mitochondrial	GLU1	sp|Q9ZNZ7|GLTB1_ARATH Ferredoxin-dependent glutamate synthase 1, chloroplastic/mitochondrial OS=Arabidopsis thaliana GN=GLU1 PE=1 SV=3	1	21.0971	20.926	20.9948	20.9492	20.9553	21.0313	21.0757	20.9616	21.0584	21.0274	21.0241	21.0469	20.9693	20.9463	21.0105	20.9979	21.0428	21.0386	21.0313	20.8899	20.8685	20.8877	20.8818	21.0153	20.9859	21.0501	21.0365	21.0452	20.9684	20.8936	20.9491	77	57.4	176.75	1622	0	323.31	21.1471	20.9689	21.0193	20.9665	20.9631	21.0738	21.1221
Q9MAB3	Q9MAB3	Probable nucleolar protein 5-2	NOP5-2	sp|Q9MAB3|NOP5B_ARATH Probable nucleolar protein 5-2 OS=Arabidopsis thaliana GN=NOP5-2 PE=2 SV=1	1	19.5414	19.4486	19.5692	19.4315	19.6799	19.7129	19.6767	19.6314	19.624	19.7412	19.7656	19.8671	19.4779	19.4239	19.5781	19.5	19.5352	19.618	19.5726	19.408	19.4917	19.4892	19.4784	19.371	19.3868	19.3781	19.3885	19.3322	19.3735	19.3618	19.3418	28	57.4	59.002	533	0	323.31	19.5298	19.4299	19.5321	19.3872	19.626	19.6938	19.6615
Q9LTR9	Q9LTR9	Glycylpeptide N-tetradecanoyltransferase 1	NMT1	sp|Q9LTR9|NMT1_ARATH Glycylpeptide N-tetradecanoyltransferase 1 OS=Arabidopsis thaliana GN=NMT1 PE=1 SV=2	1	20.4002	20.2314	20.2981	20.1293	20.2758	20.165	20.2497	20.2419	20.2712	20.1633	20.3051	20.0488	20.0287	20.0697	20.1603	20.1587	19.9358	19.9485	20.0327	20.0023	19.8273	19.9785	19.9228	19.7653	19.8519	19.9193	19.8176	19.8011	19.5192	19.5775	19.7625	24	57.4	49.798	434	0	284.68	20.683	20.5073	20.5555	20.3795	20.5164	20.4404	20.529
Q9LD57	Q9LD57	Phosphoglycerate kinase 1, chloroplastic	PGK1	sp|Q9LD57|PGKH1_ARATH Phosphoglycerate kinase 1, chloroplastic OS=Arabidopsis thaliana GN=PGK1 PE=1 SV=1	1	20.5919	20.4985	20.5422	20.5683	20.4854	20.7056	20.5583	20.5644	20.191	20.1133	20.1489	20.3219	20.648	20.5607	20.525	20.4697	20.7944	20.6511	20.5367	20.4587	20.7377	20.4132	20.5249	20.228	20.0905	20.1407	20.3322	20.8886	20.8542	20.6432	20.6871	23	57.4	50.111	481	0	323.31	20.7893	20.6889	20.7142	20.7331	20.6407	20.8956	20.7521
O48741	O48741	Protochlorophyllide reductase C, chloroplastic	PORC	sp|O48741|PORC_ARATH Protochlorophyllide reductase C, chloroplastic OS=Arabidopsis thaliana GN=PORC PE=1 SV=1	1	18.4304	18.4686	18.535	18.6267	18.4193	18.4058	18.2171	18.4281	18.6192	18.6926	18.6685	18.6361	18.5664	18.6075	18.5759	18.5124	18.8626	18.7909	18.7621	18.5661	18.7625	18.6904	18.6086	18.7347	18.6333	18.4818	18.7074	18.7751	18.77	18.8027	18.7648	22	57.4	43.882	401	0	323.31	18.2687	18.2999	18.3479	18.4324	18.2154	18.2367	18.0518
Q08682	Q08682	40S ribosomal protein Sa-1	RPSaA	sp|Q08682|RSSA1_ARATH 40S ribosomal protein Sa-1 OS=Arabidopsis thaliana GN=RPSaA PE=1 SV=3	1	21.1905	21.1214	21.2153	21.2112	21.0639	21.0074	21.0992	21.133	21.0126	20.979	21.0805	20.9843	21.0081	21.103	21.1714	21.1462	21.0523	21.0785	21.1584	21.1877	21.091	21.069	21.0621	21.1418	21.1517	21.1403	21.2012	20.9115	20.9159	20.9862	20.868	18	57.4	32.291	298	0	323.31	21.4577	21.3816	21.4571	21.4459	21.289	21.2672	21.3629
O49339	O49339	PTI1-like tyrosine-protein kinase 2	PTI12	sp|O49339|PTI12_ARATH PTI1-like tyrosine-protein kinase 2 OS=Arabidopsis thaliana GN=PTI12 PE=1 SV=1	1	17.8669	17.9065	18.051	18.1217	17.8877	17.9219	17.9901	17.9736	17.8943	17.8816	17.8724	17.9134	17.9781	18.0061	18.0137	18.0318	18.094	18.0868	18.1118	18.0396	18.072	18.0232	18.0051	18.2708	18.3424	18.2934	18.275	18.0054	17.9699	17.9331	18.0105	16	57.4	40.5	366	0	213.69	18.3609	18.3935	18.5196	18.5831	18.3396	18.4086	18.4806
Q9LZ57	Q9LZ57	60S ribosomal protein L36-3	RPL36C	sp|Q9LZ57|RL363_ARATH 60S ribosomal protein L36-3 OS=Arabidopsis thaliana GN=RPL36C PE=3 SV=1	1	17.7283	17.6808	17.6955	17.6848	17.4677	17.5565	17.5912	17.635	17.5557	17.5831	17.6021	17.6315	17.5218	17.5907	17.6384	17.6136	17.4773	17.4736	17.5051	17.5455	17.401	17.3705	17.3447	17.3669	17.3601	17.3848	17.362	17.257	17.291	17.4106	17.2599	11	57.4	12.189	108	0	15.208	18.2533	18.1987	18.1951	18.1772	17.9505	18.074	18.1126
Q94A40	Q94A40	Coatomer subunit alpha-1		sp|Q94A40|COPA1_ARATH Coatomer subunit alpha-1 OS=Arabidopsis thaliana GN=At1g62020 PE=2 SV=2	1	20.5043	20.5665	20.6001	20.6169	20.5024	20.4224	20.3712	20.4414	20.5343	20.491	20.49	20.3456	20.5064	20.5178	20.5177	20.5321	20.4975	20.6662	20.6133	20.573	20.5395	20.5835	20.558	20.4838	20.4796	20.532	20.4781	20.4423	20.3758	20.6728	20.5251	62	57.3	136.56	1216	0	323.31	20.4759	20.531	20.5462	20.5558	20.4318	20.3865	20.3392
Q9SZD6	Q9SZD6	Elongation factor Ts	F19B15.90	tr|Q9SZD6|Q9SZD6_ARATH Elongation factor Ts OS=Arabidopsis thaliana GN=F19B15.90 PE=2 SV=1	1	21.0445	20.972	21.0457	21.1606	20.7214	20.7095	20.7114	20.8348	21.2019	21.07	21.2022	21.245	21.0884	21.1919	21.0816	21.0247	21.26	21.1547	21.2144	20.8188	20.8215	20.8574	20.6765	21.0268	21.0041	21.0192	21.0929	20.8216	20.8371	20.7608	20.7861	58	57.3	103.78	953	0	323.31	21.0466	20.967	21.0224	21.13	20.6813	20.7041	20.7099
Q96321	Q96321	Importin subunit alpha-1	IMPA1	sp|Q96321|IMPA1_ARATH Importin subunit alpha-1 OS=Arabidopsis thaliana GN=IMPA1 PE=1 SV=2	1	18.3851	18.4853	18.3957	18.4308	18.2781	18.2845	18.2725	18.3414	18.2572	18.1655	18.2052	18.2881	18.3866	18.3119	18.2961	18.3717	18.348	18.3525	18.3238	18.299	18.2853	18.3104	18.3175	18.2613	18.2706	18.3686	18.2668	18.1962	18.2504	18.2006	18.2895	28	57.3	58.644	532	0	323.31	18.2336	18.3268	18.2188	18.2468	18.0845	18.1257	18.1175
P25819	P25819	Catalase-2	CAT2	sp|P25819|CATA2_ARATH Catalase-2 OS=Arabidopsis thaliana GN=CAT2 PE=2 SV=3	1	19.771	19.7059	19.8016	19.9198	19.7846	19.7556	19.6544	19.7206	19.8303	19.9566	19.7054	19.6388	19.9009	20.0086	19.8626	19.8225	19.6419	19.702	19.9291	19.7781	19.9166	19.8883	19.7698	19.4783	19.3874	19.4667	19.5298	19.8698	19.8135	19.7401	19.9097	27	57.3	56.931	492	0	323.31	19.6954	19.6232	19.7005	19.8116	19.6668	19.6726	19.5752
Q9S7E4	Q9S7E4	Formate dehydrogenase, mitochondrial	FDH1	sp|Q9S7E4|FDH_ARATH Formate dehydrogenase, chloroplastic/mitochondrial OS=Arabidopsis thaliana GN=FDH1 PE=1 SV=1	1	19.4791	19.7427	19.6573	19.7193	19.6071	19.5576	19.4062	19.5283	19.6345	19.497	19.321	19.4506	19.8921	19.5579	19.5165	19.6069	19.9485	19.7652	19.6799	19.5704	19.7918	19.5914	19.6375	19.3503	19.2015	19.2209	19.3516	19.8606	19.9349	19.6948	19.7525	21	57.3	42.409	384	0	186.86	19.577	19.8335	19.7297	19.7845	19.6628	19.6481	19.5005
O82399	O82399	Probable malate dehydrogenase, glyoxysomal		sp|O82399|MDHG2_ARATH Probable malate dehydrogenase, glyoxysomal OS=Arabidopsis thaliana GN=At2g22780 PE=2 SV=1	1	17.8887	17.7901	17.8106	17.7176	17.9377	17.8516	17.8813	17.9128	18.0487	18.385	18.3063	18.2902	17.643	17.6507	17.7767	17.6899	17.7755	17.7358	17.7548	17.7866	17.669	17.8361	17.7999	17.5802	17.4874	17.5711	17.5632	17.8702	17.7818	17.7652	17.7939	13	57.3	37.465	354	0	182.91	17.7981	17.6925	17.6947	17.5944	17.805	17.7536	17.7872
P59259	P59259	Histone H4		sp|P59259|H4_ARATH Histone H4 OS=Arabidopsis thaliana GN=At1g07660 PE=1 SV=2	1	18.418	18.2685	18.4247	18.3622	18.6117	18.606	18.4446	18.4575	18.4691	18.6496	18.7412	18.8949	18.4599	18.2741	18.3535	18.2411	18.3034	18.4883	18.4305	18.2645	18.3737	18.5948	18.3496	18.5232	18.5283	18.4361	18.3575	18.3454	18.198	18.4045	18.3918	8	57.3	11.409	103	0	61.783	18.4148	18.2583	18.3961	18.3265	18.5664	18.5954	18.4379
Q9STX5	Q9STX5	Endoplasmin homolog	SHD	sp|Q9STX5|ENPL_ARATH Endoplasmin homolog OS=Arabidopsis thaliana GN=HSP90-7 PE=1 SV=1	1	20.3569	20.4463	20.2934	20.1584	20.5934	20.5977	20.4532	20.3643	20.3685	20.4464	20.3747	20.3678	20.4256	20.29	20.3074	20.2997	20.375	20.1838	20.075	20.1785	20.2347	20.2135	20.2601	20.3534	20.3688	20.3479	20.2865	20.3684	20.2459	20.0744	20.3357	43	57.2	94.203	823	0	323.31	20.3987	20.4811	20.3099	20.1677	20.593	20.6321	20.4915
Q9FNX5	Q9FNX5	Dynamin-related protein 1E	DRP1E	sp|Q9FNX5|DRP1E_ARATH Dynamin-related protein 1E OS=Arabidopsis thaliana GN=DRP1E PE=1 SV=1	1	18.6464	18.643	18.6754	18.6277	18.7212	18.7603	18.7395	18.7047	18.8148	18.814	18.8542	18.8515	18.635	18.568	18.6251	18.5544	18.6298	18.679	18.6954	18.5632	18.55	18.5723	18.548	18.6999	18.7447	18.9024	18.7312	18.4599	18.4439	18.5434	18.516	33	57.2	69.803	624	0	323.31	18.8789	18.8685	18.8825	18.8276	18.9116	18.9854	18.9685
B9DGD6	B9DGD6	Acetyl-coenzyme A synthetase, chloroplastic/glyoxysomal	ACS	sp|B9DGD6|ACS_ARATH Acetyl-coenzyme A synthetase, chloroplastic/glyoxysomal OS=Arabidopsis thaliana GN=ACS PE=1 SV=1	1	19.4644	19.5343	19.4911	19.3363	19.4059	19.4166	19.4683	19.429	18.8656	18.7129	18.7183	18.7093	19.2635	19.3359	19.3325	19.4484	19.1863	18.9764	18.8932	19.3739	19.3888	19.2644	19.4219	18.8306	18.8132	18.816	18.8164	19.5206	19.4084	19.1741	19.4749	32	57.2	81.888	743	0	323.31	19.5979	19.6608	19.5992	19.4373	19.4973	19.5428	19.5983
O80585	O80585	Methylenetetrahydrofolate reductase 2	MTHFR2	sp|O80585|MTHR2_ARATH Methylenetetrahydrofolate reductase 2 OS=Arabidopsis thaliana GN=MTHFR2 PE=1 SV=2	1	18.8813	18.9206	18.8183	18.919	18.8519	18.8984	18.8992	18.9401	18.77	18.4816	18.5071	18.5318	18.9354	18.9647	18.7927	18.9267	19.0564	18.8702	18.6953	18.9528	18.9927	18.9319	19.0066	18.7697	18.6862	18.7569	18.6855	19.3929	19.3837	19.4487	19.491	31	57.2	66.801	594	0	323.31	19.1777	19.21	19.0892	19.1827	19.1061	19.1874	19.192
O04316	O04316	Nitrile-specifier protein 4	NSP4	sp|O04316|JAL29_ARATH Nitrile-specifier protein 4 OS=Arabidopsis thaliana GN=NSP4 PE=2 SV=1	1	19.5723	19.6131	19.3546	19.3157	19.4486	19.3208	19.302	19.2953	19.3577	19.3288	19.4051	19.2976	19.5946	19.4476	19.3448	19.5521	19.5276	19.4847	19.2106	19.3168	19.2987	19.4697	19.481	19.6443	19.5277	19.5687	19.5283	19.7339	19.503	19.2672	19.4727	25	57.2	67.603	619	0	323.31	19.6385	19.6723	19.3954	19.3494	19.4726	19.3797	19.3647
Q9CAI7	Q9CAI7	Eukaryotic initiation factor 4A-3	TIF4A-3	sp|Q9CAI7|IF4A3_ARATH Eukaryotic initiation factor 4A-3 OS=Arabidopsis thaliana GN=TIF4A-3 PE=1 SV=1	1	17.1236	17.0349	17.1665	16.9595	17.0884	17.1194	17.1242	17.1307	16.8427	16.6773	16.7493	16.7036	16.9125	16.9251	17.0966	16.966	16.9537	17.0888	17.0782	17.2773	17.1483	17.0181	17.1173	16.8133	16.8393	16.9277	16.8931	16.8857	16.8943	17.1416	16.9659	24	57.2	46.77	414	0	44.084	17.3988	17.303	17.4163	17.2021	17.3215	17.3872	17.3958
P82658	P82658	Thylakoid lumenal 19 kDa protein, chloroplastic		sp|P82658|TL19_ARATH Thylakoid lumenal 19 kDa protein, chloroplastic OS=Arabidopsis thaliana GN=At3g63540 PE=1 SV=2	1	16.8392	16.8674	16.8057	16.7654	16.7166	16.7736	16.7429	16.7715	17.1271	17.1346	17.2156	17.2316	16.8671	16.7781	16.9014	16.8902	17.1079	16.9657	16.7368	16.7783	16.8059	16.7631	16.7826	16.8544	16.7406	16.8234	16.7353	16.8351	16.814	16.7574	16.7336	9	57.2	24.979	229	0	148.38	16.8495	16.8706	16.7906	16.7431	16.6847	16.7765	16.7496
O03986;REV__F4JMB5	O03986	Heat shock protein 90-4	HSP90-4	sp|O03986|HS904_ARATH Heat shock protein 90-4 OS=Arabidopsis thaliana GN=HSP90-4 PE=1 SV=1	2	17.1788	17.1056	17.0836	17.0511	17.0834	17.1793	17.1865	17.0355	16.724	16.6165	16.6124	16.675	17.0008	16.9795	17.0253	16.9752	17.1113	16.9639	16.7454	17.0643	17.2634	17.0809	17.1031	16.7168	16.6529	16.6118	16.7258	17.2555	17.1768	17.0114	17.1152	39	57.1	80.14	699	0	23.862	17.2205	17.1403	17.0999	17.0602	17.083	17.2136	17.2247
Q9M352	Q9M352	60S ribosomal protein L36-2	RPL36B	sp|Q9M352|RL362_ARATH 60S ribosomal protein L36-2 OS=Arabidopsis thaliana GN=RPL36B PE=2 SV=1	1	19.3911	19.3367	19.3646	19.316	19.2968	19.2065	19.2646	19.321	19.1689	19.0909	19.215	19.1908	19.2034	19.2132	19.2987	19.2317	19.0564	19.1001	19.1656	19.1242	19.0294	18.9934	18.9784	19.0512	19.069	19.0276	19.057	18.8833	18.8685	18.981	18.7841	12	57.1	12.676	112	0	26.659	19.21	19.1485	19.158	19.1022	19.0735	19.018	19.0799
Q96253	Q96253	ATP synthase subunit epsilon, mitochondrial		sp|Q96253|ATP5E_ARATH ATP synthase subunit epsilon, mitochondrial OS=Arabidopsis thaliana GN=At1g51650 PE=1 SV=3	1	16.3807	16.4659	16.4751	16.5051	16.5377	16.5185	16.4682	16.536	16.7066	16.78	16.7255	16.9141	16.5762	16.6674	16.5763	16.5096	16.3874	16.4544	16.5808	16.5052	16.6232	16.5432	16.3702	17.0562	17.0039	16.8117	16.8901	16.2898	16.2765	16.3948	16.3157	4	57.1	7.8319	70	0	24.732	16.1177	16.1959	16.1867	16.2095	16.2326	16.2481	16.2017
Q9LIB2;REV__O49538	Q9LIB2	Alpha-glucan phosphorylase 1	PHS1	sp|Q9LIB2|PHS1_ARATH Alpha-glucan phosphorylase 1 OS=Arabidopsis thaliana GN=PHS1 PE=2 SV=1	2	20.6168	20.3618	20.4933	20.4211	20.6363	20.5772	20.4804	20.6497	20.3652	20.2989	20.0457	20.0795	20.4532	20.4596	20.5668	20.5092	20.2532	20.125	20.0085	20.5381	20.5498	20.4743	20.5412	20.1026	20.0672	20.1621	20.1901	20.8764	20.9493	20.8602	20.963	45	57	108.58	962	0	323.31	21.2978	21.0358	21.1489	21.0695	21.2751	21.2507	21.1578
P55826	P55826	Protoporphyrinogen oxidase 1, chloroplastic	PPOX1	sp|P55826|PPOC_ARATH Protoporphyrinogen oxidase 1, chloroplastic OS=Arabidopsis thaliana GN=PPOX1 PE=1 SV=1	1	19.1143	19.1575	19.2254	19.2549	19.1756	19.1055	19.0611	19.1157	19.3333	19.3992	19.2954	19.3969	19.3514	19.3369	19.3313	19.2311	19.4295	19.4521	19.3869	19.2139	19.2885	19.2827	19.1864	19.4374	19.436	19.3139	19.3023	19.3587	19.321	19.3328	19.311	30	57	57.695	537	0	323.31	19.1515	19.1877	19.2372	19.2595	19.1706	19.1353	19.0947
P92994;Q9LEX2;Q9SGP1	P92994	Trans-cinnamate 4-monooxygenase	CYP73A5	sp|P92994|TCMO_ARATH Trans-cinnamate 4-monooxygenase OS=Arabidopsis thaliana GN=CYP73A5 PE=2 SV=1	3	19.3498	19.5622	19.4251	19.3917	19.7999	19.706	19.6235	19.551	19.9659	20.2823	20.1669	20.1784	19.3852	19.4331	19.3303	19.3949	19.4479	19.3051	19.2339	19.2219	19.3163	19.4308	19.2616	19.7402	19.8494	19.7952	19.5161	19.525	19.29	19.3567	19.5137	28	57	57.792	505	0	323.31	19.4077	19.613	19.4576	19.417	19.8156	19.7564	19.6778
P46644	P46644	Aspartate aminotransferase 3, chloroplastic	ASP3	sp|P46644|AAT3_ARATH Aspartate aminotransferase 3, chloroplastic OS=Arabidopsis thaliana GN=ASP3 PE=1 SV=1	1	18.2215	18.2668	18.3932	18.4741	18.2462	18.1245	18.1804	18.1419	18.5897	19.0317	18.6067	18.5011	18.3015	18.2036	18.2573	18.3276	18.3485	18.4886	18.4737	18.4169	18.4006	18.4615	18.4136	18.096	18.1147	18.1385	18.1608	18.1395	18.2568	18.4737	18.2771	24	57	48.954	449	0	267.3	18.4723	18.5106	18.6186	18.6923	18.4548	18.3679	18.4277
Q9SIZ2	Q9SIZ2		At2g40290	tr|Q9SIZ2|Q9SIZ2_ARATH Eukaryotic translation initiation factor 2 subunit 1 OS=Arabidopsis thaliana GN=At2g40290 PE=2 SV=2	1	19.6985	19.6666	19.6262	19.6739	19.5097	19.5094	19.5583	19.6315	19.6624	19.6896	19.6899	19.6578	19.6127	19.6128	19.5224	19.5996	19.6096	19.6439	19.7952	19.7117	19.5548	19.7413	19.769	19.4541	19.557	19.5838	19.5151	19.4691	19.5812	19.5853	19.6177	22	57	38.747	344	0	248.53	19.7588	19.7199	19.6611	19.7016	19.5279	19.5623	19.615
P06525	P06525	Alcohol dehydrogenase class-P	ADH1	sp|P06525|ADH1_ARATH Alcohol dehydrogenase class-P OS=Arabidopsis thaliana GN=ADH1 PE=1 SV=2	1	18.9364	19.0672	18.781	18.5341	18.8609	18.9899	19.0837	18.8848	18.3867	18.1097	18.1492	18.2443	18.6931	18.7574	18.7491	18.9904	18.4188	18.1333	17.971	18.8814	18.9339	18.8418	19.1443	18.0107	18.0993	18.1126	17.9359	18.6055	18.5568	18.5854	18.8043	17	57	41.178	379	0	220.52	19.2758	19.3996	19.095	18.8409	19.1582	19.3219	19.4196
Q9CAT7	Q9CAT7	Nascent polypeptide-associated complex subunit beta	T18K17.10	sp|Q9CAT7|BTF3L_ARATH Nascent polypeptide-associated complex subunit beta OS=Arabidopsis thaliana GN=At1g73230 PE=2 SV=1	1	20.8058	20.7199	20.6982	20.6247	20.6155	20.5619	20.6287	20.695	20.4644	20.4698	20.601	20.5759	20.6058	20.6379	20.6718	20.5898	20.3012	20.4083	20.45	20.5182	20.3721	20.3727	20.3367	20.3863	20.3524	20.3537	20.3776	20.2211	20.1758	20.2586	20.0392	10	57	18.004	165	0	267.37	21.1825	21.0895	21.0494	20.9687	20.9499	20.9311	21.0018
Q8LPR9	Q8LPR9	Protein TIC110, chloroplastic	TIC110	sp|Q8LPR9|TI110_ARATH Protein TIC110, chloroplastic OS=Arabidopsis thaliana GN=TIC110 PE=1 SV=1	1	20.3064	20.411	20.4032	20.4312	20.3959	20.3897	20.2741	20.3353	20.7698	20.9658	20.8269	20.9581	20.5614	20.6066	20.5665	20.4396	20.6584	20.6163	20.6261	20.3072	20.4409	20.4846	20.2969	20.9079	20.9272	20.8907	20.8391	20.5991	20.4404	20.5087	20.5517	58	56.9	112.12	1016	0	323.31	20.3763	20.4739	20.4477	20.4685	20.4237	20.4522	20.3405
Q9LHS5	Q9LHS5		At5g06110	tr|Q9LHS5|Q9LHS5_ARATH Cell division related protein-like OS=Arabidopsis thaliana GN=At5g06110 PE=4 SV=1	1	20.1154	20.0692	20.1301	20.0862	19.9911	19.9896	20.0316	20.0304	19.9997	20.0531	20.0974	20.0667	19.9544	19.9798	20.1003	20.0446	19.855	19.8822	19.9221	19.9002	19.791	19.829	19.782	19.9204	19.9478	20.0092	19.9279	19.3859	19.4617	19.5273	19.4077	42	56.9	75.632	663	0	323.31	19.8795	19.8262	19.8687	19.8176	19.713	19.7463	19.792
O22886	O22886	Uroporphyrinogen decarboxylase 2, chloroplastic	HEME2	sp|O22886|DCUP2_ARATH Uroporphyrinogen decarboxylase 2, chloroplastic OS=Arabidopsis thaliana GN=HEME2 PE=2 SV=1	1	18.2501	17.7835	18.2565	18.071	17.6974	17.6952	18.0034	17.9108	17.7295	17.5733	17.5264	17.7067	17.9198	17.9601	17.964	17.8687	17.8884	17.8738	17.8598	18.0326	17.8268	17.9291	17.9347	17.8752	17.7342	18.0056	17.9651	17.9463	17.9943	17.8354	17.9988	18	56.9	43.579	394	0	217.07	18.436	17.9623	18.4169	18.2243	17.8411	17.8737	18.1857
Q07100	Q07100	Serine/threonine-protein phosphatase PP2A-4 catalytic subunit	PP2A4	sp|Q07100|PP2A4_ARATH Serine/threonine-protein phosphatase PP2A-4 catalytic subunit OS=Arabidopsis thaliana GN=PP2A4 PE=2 SV=2	1	13.8295	13.9728	13.821	13.8796	13.9661	13.9918	14.1041	14.2283	13.5884	13.1866	13.3094	13.0839	13.7144	13.7811	13.8418	13.7649	13.7328	13.9825	13.7139	13.898	13.8122	13.8705	14.0322	13.754	13.691	13.8599	13.88	13.8641	13.9642	14.0098	14.0677	14	56.9	35.832	313	0	10.61	14.119	14.2553	14.0851	14.1365	14.2135	14.2739	14.3901
Q9FV53	Q9FV53	Peptide deformylase 1A, chloroplastic/mitochondrial	PDF1A	sp|Q9FV53|DEF1A_ARATH Peptide deformylase 1A, chloroplastic/mitochondrial OS=Arabidopsis thaliana GN=PDF1A PE=1 SV=3	1	17.7655	17.8382	17.7535	17.7507	17.8937	17.8771	17.7547	17.8413	17.8	17.7505	17.6848	17.6737	17.8473	17.8571	17.8182	17.9319	18.0782	17.9976	17.9298	18.0952	18.0879	18.0136	18.0279	17.76	17.8	17.7891	17.6858	17.9534	18.0977	17.9304	17.9986	14	56.9	29.995	269	0	73.656	17.8649	17.9306	17.8275	17.8175	17.9509	17.969	17.8505
Q8L7N2	Q8L7N2		At1g09150	tr|Q8L7N2|Q8L7N2_ARATH Pseudouridine synthase and archaeosine transglycosylase domain-containing protein OS=Arabidopsis thaliana GN=At1g09150 PE=2 SV=1	1	18.0107	17.9431	18.0051	18.0226	18.1081	18.08	18.0987	18.0669	18.0484	18.1753	18.0621	18.1593	17.9805	17.8112	17.9722	17.9889	17.7306	17.8765	18.0578	18.1296	17.9426	18.0642	18.093	17.8479	17.8364	17.9332	17.8734	17.6884	17.8603	17.8528	17.7777	8	56.9	20.457	181	0	312.38	18.1407	18.0661	18.1097	18.12	18.1959	18.2026	18.2252
Q8L7L0	Q8L7L0	GTP-binding protein OBGC, chloroplastic	OBGL	sp|Q8L7L0|OBGC_ARATH GTP-binding protein OBGC, chloroplastic OS=Arabidopsis thaliana GN=OBGL PE=2 SV=1	1	19.3196	19.3197	19.4114	19.5698	19.246	19.2257	19.1314	19.3073	19.4701	19.2838	19.3768	19.435	19.4172	19.5151	19.4621	19.4626	19.4412	19.4704	19.5905	19.5812	19.4905	19.5547	19.3827	19.1909	19.2434	19.2889	19.2081	19.0145	19.2685	19.5057	19.3538	34	56.8	75.647	681	0	323.31	19.3582	19.3513	19.4246	19.5758	19.2425	19.257	19.1665
Q9SPK5;Q9ZUP9	Q9SPK5	Formate--tetrahydrofolate ligase	THFS	sp|Q9SPK5|FTHS_ARATH Formate--tetrahydrofolate ligase OS=Arabidopsis thaliana GN=THFS PE=2 SV=1	2	20.3411	20.3813	20.3741	20.2528	20.4368	20.3467	20.5062	20.4432	20.5153	21.0861	21.0437	21.1326	20.2461	20.2714	20.3635	20.2691	20.0527	20.1763	20.2676	20.5193	20.3049	20.511	20.4749	20.235	20.3362	20.4566	20.2219	20.3347	20.4259	20.2982	20.3694	34	56.8	67.801	634	0	323.31	20.351	20.3843	20.3586	20.2301	20.4046	20.3493	20.5126
Q93ZN2;F4HPY8	Q93ZN2	Probable aldo-keto reductase 4		sp|Q93ZN2|ALKR4_ARATH Probable aldo-keto reductase 4 OS=Arabidopsis thaliana GN=At1g60710 PE=2 SV=1	2	18.3436	18.3593	18.149	18.1872	18.2132	18.2663	18.5918	18.2283	18.334	18.1038	18.1136	18.2095	18.2349	18.2482	18.1254	18.21	18.4347	18.1282	18.0431	18.0134	18.1238	18.1082	18.1087	18.0579	18.0033	18.0042	18.0283	18.6596	18.6614	18.4412	18.5948	18	56.8	37.924	345	0	102.08	18.6837	18.6923	18.4636	18.4946	18.5111	18.5989	18.9282
Q9ZUY6	Q9ZUY6	UDP-D-apiose/UDP-D-xylose synthase 1	AXS1	sp|Q9ZUY6|AXS1_ARATH UDP-D-apiose/UDP-D-xylose synthase 1 OS=Arabidopsis thaliana GN=AXS1 PE=1 SV=1	1	15.4671	15.4861	15.4366	15.4568	15.3509	15.4643	15.3883	15.4392	15.2913	15.2103	15.008	15.04	15.5377	15.4029	15.3726	15.5036	15.4834	15.453	15.334	15.5965	15.6472	15.5325	15.6281	15.5359	15.4835	15.5706	15.6134	15.5796	15.5866	15.6579	15.6241	18	56.8	43.637	389	0	31.841	15.402	15.4139	15.346	15.3591	15.2436	15.3918	15.3196
O24412	O24412	26S proteasome non-ATPase regulatory subunit 7 homolog A	RPN8A	sp|O24412|PSD7A_ARATH 26S proteasome non-ATPase regulatory subunit 7 homolog A OS=Arabidopsis thaliana GN=RPN8A PE=1 SV=1	1	18.7238	18.6759	18.6664	18.6306	18.7481	18.6661	18.7975	18.7167	18.3813	18.2692	18.3398	18.2403	18.5455	18.613	18.6151	18.6697	18.5435	18.556	18.5247	18.7483	18.6064	18.6229	18.7175	18.497	18.5669	18.6048	18.5206	18.5858	18.525	18.6059	18.6382	15	56.8	34.728	308	0	239.02	18.8738	18.8189	18.791	18.748	18.856	18.8087	18.9439
P61841	P61841	30S ribosomal protein S7, chloroplastic	rps7-A	sp|P61841|RR7_ARATH 30S ribosomal protein S7, chloroplastic OS=Arabidopsis thaliana GN=rps7-A PE=1 SV=1	1	18.5005	18.3808	18.5125	18.5646	18.3654	18.3034	18.2779	18.4068	18.4768	18.2124	18.4035	18.2783	18.4029	18.4898	18.4453	18.4262	18.5027	18.5065	18.558	18.6259	18.5467	18.4967	18.4221	18.2743	18.248	18.3297	18.3335	18.374	18.4817	18.5898	18.4887	11	56.8	17.357	155	0	45.362	18.3103	18.1836	18.2968	18.3418	18.1331	18.1058	18.0841
Q9MAH0	Q9MAH0	Phosphoenolpyruvate carboxylase 1	PPC1	sp|Q9MAH0|CAPP1_ARATH Phosphoenolpyruvate carboxylase 1 OS=Arabidopsis thaliana GN=PPC1 PE=1 SV=1	1	20.3928	20.2867	20.2331	20.0588	20.5436	20.6004	20.6808	20.4482	20.0192	19.9566	20.0348	19.9599	20.2409	20.2136	20.2875	20.3005	20.3125	20.323	20.1287	20.3977	20.3711	20.2001	20.2841	20.321	20.3081	20.3057	20.2374	20.6481	20.4103	20.4697	20.4777	54	56.7	110.28	967	0	323.31	20.5141	20.401	20.329	20.1476	20.6228	20.7143	20.7986
Q9LK36	Q9LK36	Adenosylhomocysteinase 2	SAHH2	sp|Q9LK36|SAHH2_ARATH Adenosylhomocysteinase 2 OS=Arabidopsis thaliana GN=SAHH2 PE=1 SV=1	1	17.5433	17.5782	17.3713	17.2476	17.5946	17.6833	17.5781	17.5179	16.6365	16.3493	16.4719	16.5793	17.4753	17.2163	17.2475	17.452	17.1755	17.1225	16.8066	17.4823	17.5998	17.2493	17.5223	17.3821	17.2566	17.3567	17.2884	17.1891	17.2791	17.2141	17.2444	24	56.7	53.159	485	0	214.61	17.2448	17.2727	17.0474	16.9165	17.254	17.3774	17.276
P25873	P25873	50S ribosomal protein L15, chloroplastic	RPL15	sp|P25873|RK15_ARATH 50S ribosomal protein L15, chloroplastic OS=Arabidopsis thaliana GN=RPL15 PE=1 SV=2	1	20.1854	20.1512	20.2404	20.3512	20.1746	20.1393	20.0716	20.2524	20.3384	20.2549	20.3451	20.2794	20.1865	20.317	20.2477	20.1959	20.245	20.3141	20.4864	20.3644	20.2576	20.3049	20.198	20.1102	20.0796	20.1318	20.1845	20.0396	20.2172	20.3152	20.1861	22	56.7	29.707	277	0	323.31	20.0445	20.0032	20.074	20.1777	19.9915	19.9909	19.9271
Q9M9P3	Q9M9P3	Probable UTP--glucose-1-phosphate uridylyltransferase 2		sp|Q9M9P3|UGPA2_ARATH UTP--glucose-1-phosphate uridylyltransferase 2 OS=Arabidopsis thaliana GN=UGP2 PE=1 SV=1	1	18.5872	18.6289	18.4975	18.4558	18.5471	18.6162	18.602	18.5674	18.5911	18.5725	18.5375	18.6077	18.6779	18.6312	18.5919	18.7168	18.5559	18.6281	18.4217	18.633	18.6763	18.5668	18.5925	18.814	18.7055	18.7101	18.7395	18.8034	18.7542	18.709	18.664	22	56.7	51.738	469	0	259.54	18.6213	18.656	18.5062	18.4573	18.5391	18.6429	18.6325
Q9SIM4	Q9SIM4	60S ribosomal protein L14-1	RPL14A	sp|Q9SIM4|RL141_ARATH 60S ribosomal protein L14-1 OS=Arabidopsis thaliana GN=RPL14A PE=2 SV=1	1	18.5833	18.6044	18.6478	18.568	18.5689	18.551	18.6711	18.5212	18.4737	18.4386	18.5543	18.4981	18.4248	18.433	18.5839	18.5274	18.3461	18.4416	18.4573	18.3279	18.305	18.3318	18.2405	18.2993	18.3242	18.3664	18.3212	18.1133	18.1144	18.2838	18.1161	12	56.7	15.506	134	0	38.688	18.5372	18.5512	18.5762	18.4892	18.4805	18.4974	18.6214
O80852	O80852	Glutathione S-transferase F9	GSTF9	sp|O80852|GSTF9_ARATH Glutathione S-transferase F9 OS=Arabidopsis thaliana GN=GSTF9 PE=1 SV=1	1	19.7953	19.9756	19.7644	19.5959	19.4698	19.5254	19.5573	19.493	18.5299	18.2415	18.3325	18.2551	19.6286	19.5244	19.3687	19.6462	19.1788	18.6807	18.595	19.398	19.4922	19.2046	19.5677	18.5367	18.4042	18.4924	18.5115	19.6167	19.5516	18.8951	19.3547	11	56.7	24.146	215	0	162.39	19.3321	19.5053	19.2758	19.1001	18.9644	19.0547	19.0904
P59233;P59232	P59233;P59232	Ubiquitin-40S ribosomal protein S27a-3;Ubiquitin;40S ribosomal protein S27a-3;Ubiquitin-40S ribosomal protein S27a-2;Ubiquitin;40S ribosomal protein S27a-2	RPS27AC;RPS27AB	sp|P59233|R27AC_ARATH Ubiquitin-40S ribosomal protein S27a-3 OS=Arabidopsis thaliana GN=RPS27AC PE=1 SV=2;sp|P59232|R27AB_ARATH Ubiquitin-40S ribosomal protein S27a-2 OS=Arabidopsis thaliana GN=RPS27AB PE=1 SV=2	2	20.7243	20.6335	20.6344	20.5931	20.5718	20.5697	20.6363	20.6018	20.4339	20.3781	20.5014	20.5081	20.4729	20.5266	20.5447	20.5761	20.5683	20.532	20.4846	20.5364	20.5065	20.4554	20.4879	20.4344	20.4668	20.4804	20.3683	20.4786	20.3715	20.3544	20.3494	9	56.7	17.797	157	0	296.48	20.8709	20.7731	20.7556	20.7071	20.6762	20.7089	20.7793
Q9SSB8	Q9SSB8	Cytochrome c oxidase subunit 5b-2, mitochondrial	COX5B-2	sp|Q9SSB8|CX5B2_ARATH Cytochrome c oxidase subunit 5b-2, mitochondrial OS=Arabidopsis thaliana GN=COX5B-2 PE=2 SV=1	1	17.8671	17.9255	18.0635	18.1363	18.0696	17.8902	17.9433	18.0305	17.599	17.3603	17.3645	17.4714	18.0112	18.2086	18.3258	18.1058	18.1865	18.0692	18.1961	18.2171	18.2835	18.2669	18.1595	18.9474	18.9547	18.6452	18.764	18.3521	18.2534	18.1672	18.244	9	56.7	18.583	171	0	169.87	17.4087	17.4601	17.5797	17.6453	17.569	17.4245	17.4814
F4HS68	F4HS68		EMB2753	tr|F4HS68|F4HS68_ARATH Tetratricopeptide repeat-containing protein OS=Arabidopsis thaliana GN=EMB2753 PE=4 SV=1	1	20.9842	20.9075	20.9307	20.8683	21.0417	21.0181	21.0507	21.0398	21.0696	21.2282	21.2004	21.2186	20.8644	20.8753	20.8973	20.8873	20.7394	20.8588	20.9417	20.9351	20.8004	20.9559	20.9187	20.8533	20.9524	21.0113	20.8986	20.5928	20.6911	20.7653	20.6962	56	56.6	103.94	911	0	323.31	21.0322	20.9484	20.9532	20.8836	21.0475	21.0587	21.0951
Q944H0	Q944H0	Phosphomethylethanolamine N-methyltransferase	NMT2	sp|Q944H0|PEAM2_ARATH Phosphomethylethanolamine N-methyltransferase OS=Arabidopsis thaliana GN=NMT2 PE=2 SV=2	1	19.821	19.7602	19.4419	19.2984	19.765	19.8385	19.9767	19.6576	19.0612	18.6674	18.7476	18.6933	19.3386	19.2588	19.2754	19.3714	19.4986	19.3852	19.3265	19.4376	19.3258	19.3409	19.438	19.0283	19.1018	18.977	18.9457	19.4581	19.3973	19.4712	19.4136	28	56.6	56.045	491	0	270.53	19.7802	19.7123	19.3757	19.225	19.682	19.7903	19.9323
O23523	O23523		dl4440w	tr|O23523|O23523_ARATH AT4g16830/dl4440w OS=Arabidopsis thaliana GN=dl4440w PE=1 SV=1	1	19.128	19.1637	19.1111	19.0059	19.1629	19.1098	19.2965	19.0815	19.2973	19.5901	19.7496	19.5606	19.0419	19.0541	19.0902	19.1193	18.4745	18.5375	18.8013	18.9923	18.7978	19.0641	18.9094	18.9809	19.1685	19.1415	19.0746	18.4803	18.4534	18.2881	18.508	23	56.6	37.467	355	0	229.19	19.1744	19.2031	19.1321	19.0197	19.1672	19.1488	19.3393
Q93Y35	Q93Y35	26S proteasome non-ATPase regulatory subunit 6 homolog	RPN7	sp|Q93Y35|PSMD6_ARATH 26S proteasome non-ATPase regulatory subunit 6 homolog OS=Arabidopsis thaliana GN=RPN7 PE=1 SV=1	1	19.5582	19.6022	19.5911	19.5214	19.5608	19.5437	19.5941	19.5297	19.2872	19.145	19.218	19.2109	19.4798	19.4612	19.4293	19.5136	19.3857	19.472	19.445	19.6612	19.5363	19.5824	19.6342	19.4861	19.6012	19.6278	19.5271	19.4455	19.4699	19.5314	19.6121	19	56.6	44.282	387	0	171.88	19.3375	19.3745	19.3451	19.2682	19.298	19.3156	19.3699
Q56YA5	Q56YA5	Serine--glyoxylate aminotransferase	AGT1	sp|Q56YA5|SGAT_ARATH Serine--glyoxylate aminotransferase OS=Arabidopsis thaliana GN=AGT1 PE=1 SV=2	1	18.4419	18.3416	18.4236	18.4717	18.0122	18.3399	18.3139	18.1939	18.3026	17.9224	17.8637	17.8839	18.4348	18.285	18.1631	18.3122	18.5069	18.2975	18.2599	18.2528	18.3503	18.1386	18.2677	17.9163	17.7559	17.8352	17.9733	18.4992	18.5601	18.3645	18.4765	16	56.6	44.207	401	0	323.31	18.5515	18.4441	18.5077	18.5487	18.0796	18.4421	18.4199
F4K4E3	F4K4E3	Sm-like protein LSM4	LSM4	sp|F4K4E3|LSM4_ARATH Sm-like protein LSM4 OS=Arabidopsis thaliana GN=LSM4 PE=1 SV=1	1	17.7315	17.4902	17.6058	17.436	17.3665	17.3547	17.4077	17.4131	17.3409	17.3668	17.3697	17.2962	17.3079	17.3757	17.501	17.4577	17.1502	17.2886	17.2858	17.4737	17.2622	17.3741	17.394	17.3329	17.4143	17.5387	17.3821	17.1015	17.1842	17.0208	17.1516	8	56.6	14.323	129	0	26.11	17.6579	17.4096	17.5067	17.3297	17.2506	17.2737	17.3304
O49313	O49313	NADH dehydrogenase [ubiquinone] 1 alpha subcomplex subunit 13-B		sp|O49313|NDADB_ARATH NADH dehydrogenase [ubiquinone] 1 alpha subcomplex subunit 13-B OS=Arabidopsis thaliana GN=At2g33220 PE=2 SV=1	1	17.3395	17.371	17.4545	17.62	17.5193	17.5193	17.3765	17.4135	18.0883	18.2577	18.1175	18.3173	17.6883	17.7705	17.7157	17.6352	17.5813	17.5086	17.6105	17.5465	17.7139	17.6261	17.4749	18.0976	18.1014	17.8634	17.9455	17.6986	17.5772	17.6259	17.6282	8	56.6	16.121	143	0	62.915	17.4788	17.5033	17.5684	17.7267	17.6165	17.6512	17.5122
O65686	O65686		T4L20.200	tr|O65686|O65686_ARATH AT4g34620/T4L20_200 OS=Arabidopsis thaliana GN=T4L20.200 PE=2 SV=1	1	18.6803	18.5314	18.6784	18.6716	18.553	18.5014	18.4697	18.5788	18.5287	18.4015	18.5159	18.4586	18.5599	18.6711	18.6767	18.6181	18.6102	18.6909	18.7437	18.7712	18.736	18.7037	18.5829	18.4522	18.4424	18.5203	18.5279	18.5347	18.6076	18.6666	18.641	7	56.6	12.699	113	0	93.812	18.6788	18.5228	18.6514	18.6375	18.5093	18.4924	18.4646
Q9SN73	Q9SN73		F1P2.200	tr|Q9SN73|Q9SN73_ARATH DnaJ/Hsp40 cysteine-rich domain-containing protein OS=Arabidopsis thaliana GN=F1P2.200 PE=2 SV=1	1	16.9206	16.4753	16.7942	17.0441	16.8556	16.7628	16.8943	17.0918	16.7574	16.35	16.4568	16.2312	16.931	16.8322	16.9224	16.9652	17.1007	17.2834	17.1416	17.2395	17.2461	17.2353	17.117	16.4149	16.3901	16.4364	16.4501	17.4297	17.3167	17.4974	17.2586	6	56.6	14.546	136	0	264.58	17.1283	16.6759	16.9765	17.2192	17.0211	16.9631	17.0984
Q9SRR8	Q9SRR8		F21O3.19	tr|Q9SRR8|Q9SRR8_ARATH 2Fe-2S ferredoxin-like protein OS=Arabidopsis thaliana GN=F21O3.19 PE=2 SV=1	1	16.954	16.9634	16.9347	17.0639	16.998	17.0593	16.9943	16.95	17.3344	17.4475	17.3619	17.4182	17.1	17.1221	17.0427	17.0275	17.1423	17.0643	17.0962	17.1852	17.2734	17.2876	17.2595	17.1137	17.1241	17.0785	17.0977	17.0964	17.1211	17.2148	17.0859	6	56.6	17.602	159	0	74.725	17.1602	17.1626	17.1155	17.2375	17.1621	17.2582	17.197
Q940J8	Q940J8	Pectin acetylesterase 7	PAE7	sp|Q940J8|PAE7_ARATH Pectin acetylesterase 7 OS=Arabidopsis thaliana GN=PAE7 PE=2 SV=1	1	18.4529	18.1234	18.3155	18.0494	19.118	18.4906	18.3364	18.4261	19.0548	19.1242	19.0339	18.8404	17.9893	17.8232	18.003	17.982	18.2044	18.4809	18.8124	18.2283	17.9479	19.2027	18.9007	17.5894	17.5794	17.6926	17.7316	18.4695	18.9124	18.5597	18.9557	16	56.5	42.125	391	0	323.31	18.5818	18.2452	18.419	18.1457	19.2047	18.6121	18.4617
P28186	P28186	Ras-related protein RABE1c	RABE1C	sp|P28186|RAE1C_ARATH Ras-related protein RABE1c OS=Arabidopsis thaliana GN=RABE1C PE=1 SV=1	1	16.5944	16.6842	16.5729	16.4996	16.7425	16.5858	16.6961	16.5405	16.7645	16.7103	16.7254	16.6367	16.6903	16.5495	16.5832	16.5445	16.7838	16.5453	16.478	16.4272	16.5855	16.5242	16.5479	17.1656	17.2148	17.1766	17.0764	16.8373	16.5644	16.6932	16.7877	13	56.5	23.835	216	0	117.63	16.6221	16.7048	16.5751	16.4946	16.728	16.6061	16.7203
O81644	O81644	Villin-2	VLN2	sp|O81644|VILI2_ARATH Villin-2 OS=Arabidopsis thaliana GN=VLN2 PE=1 SV=2	1	19.6974	19.7324	19.6538	19.6224	19.7582	19.8021	19.8419	19.7817	19.5406	19.4282	19.4603	19.4077	19.7025	19.6913	19.6639	19.691	19.8138	19.6771	19.6741	19.7463	19.7143	19.6868	19.6977	19.6278	19.5684	19.5878	19.6732	19.7985	19.7832	19.6652	19.8474	43	56.4	107.84	976	0	323.31	19.5274	19.5554	19.4584	19.4198	19.546	19.6247	19.6683
O80860;Q1PDW5	O80860	ATP-dependent zinc metalloprotease FTSH 2, chloroplastic	FTSH2	sp|O80860|FTSH2_ARATH ATP-dependent zinc metalloprotease FTSH 2, chloroplastic OS=Arabidopsis thaliana GN=FTSH2 PE=1 SV=1	2	19.1464	19.3533	19.2799	19.3597	19.3627	19.2731	19.1722	19.1476	19.8855	20.0889	19.8204	19.9749	19.591	19.6212	19.5415	19.464	19.8907	19.8303	19.7538	19.3305	19.5422	19.5208	19.4596	19.9979	20.0392	19.766	19.8281	19.7613	19.6663	19.6899	19.6768	34	56.4	74.157	695	0	323.31	18.9952	19.1951	19.1033	19.1759	19.1694	19.1145	19.0175
F4K409	F4K409		At5g13650	tr|F4K409|F4K409_ARATH Putative TypA-like translation elongation factor SVR3 OS=Arabidopsis thaliana GN=At5g13650 PE=4 SV=1	1	18.8517	18.8334	18.9841	19.1877	18.7886	18.6992	18.546	18.9019	19.2577	19.0971	19.0207	19.1769	19.2071	19.2817	19.2014	19.1951	19.3337	19.3718	19.4702	19.4647	19.5091	19.3581	19.2383	18.9191	18.8539	18.9644	18.8902	19.0401	19.2689	19.7058	19.3183	31	56.4	74.413	676	0	323.31	18.8444	18.819	18.9514	19.1478	18.7391	18.6844	18.5351
Q93ZC2;Q9FH32	Q93ZC2		At5g36230	tr|Q93ZC2|Q93ZC2_ARATH AT5g36230/T30G6_9 OS=Arabidopsis thaliana GN=At5g36230 PE=2 SV=1	2	18.9818	19.0111	19.0668	19.0422	19.0514	18.9964	18.9653	19.0243	19.0934	19.0658	19.0353	19.0111	19.0205	19.0205	19.0606	19.0139	19.1078	19.1834	19.203	19.1175	19.0835	19.0828	19.0669	18.9782	18.9901	19.0428	19.0325	18.8557	18.8344	19.1298	18.9433	23	56.4	47.215	411	0	312.65	18.621	18.6432	18.6805	18.6487	18.6483	18.6281	18.6008
Q9LUG5	Q9LUG5	Ribosome production factor 2 homolog		sp|Q9LUG5|RPF2_ARATH Ribosome production factor 2 homolog OS=Arabidopsis thaliana GN=At3g23620 PE=2 SV=1	1	18.397	18.2559	18.359	18.2146	18.365	18.3629	18.4255	18.347	18.5283	18.5003	18.6219	18.6723	18.1399	18.114	18.3055	18.2708	18.1212	18.3281	18.2542	18.2506	18.2107	18.208	18.1648	18.0924	18.157	18.1675	18.0359	17.7349	17.8109	18.0477	17.8036	18	56.4	35.727	314	0	240.21	18.4228	18.2746	18.3593	18.2078	18.3486	18.3813	18.4477
P48482;O82733	P48482	Serine/threonine-protein phosphatase PP1 isozyme 2	TOPP2	sp|P48482|PP12_ARATH Serine/threonine-protein phosphatase PP1 isozyme 2 OS=Arabidopsis thaliana GN=TOPP2 PE=1 SV=1	2	17.5503	17.5351	17.5743	17.5571	17.4491	17.3218	17.4379	17.4237	17.4666	17.4077	17.4845	17.3325	17.4645	17.4659	17.4502	17.5308	17.3873	17.4111	17.4075	17.5132	17.4633	17.5626	17.583	17.3912	17.3379	17.4828	17.3539	17.2624	17.2114	17.3241	17.4871	14	56.4	35.531	312	0	119.33	17.5726	17.5504	17.5712	17.5468	17.4292	17.3367	17.4567
Q9M0V5	Q9M0V5		At4g05400	tr|Q9M0V5|Q9M0V5_ARATH At4g05400 OS=Arabidopsis thaliana GN=At4g05400 PE=2 SV=1	1	17.8199	17.8345	17.8104	17.8527	17.8233	17.8268	17.8951	17.8728	18.1259	18.4009	18.3986	18.4578	17.8673	17.9407	18.0392	17.9136	17.8751	17.8397	17.906	17.922	17.973	17.9759	17.9486	18.0341	18.0392	17.991	17.9482	17.6139	17.6649	17.6682	17.6922	12	56.4	27.627	250	0	112.55	17.9406	17.9481	17.9057	17.9408	17.9018	17.94	18.0121
Q9CB01	Q9CB01	Ras-related protein RABF1	RABF1	sp|Q9CB01|RABF1_ARATH Ras-related protein RABF1 OS=Arabidopsis thaliana GN=RABF1 PE=1 SV=1	1	16.684	16.7607	16.6758	16.6246	16.7732	16.7342	16.7132	16.6691	16.7397	16.8759	16.7703	16.81	16.7305	16.7161	16.7749	16.6401	16.6375	16.604	16.5022	16.5011	16.6881	16.5654	16.5321	16.9862	17.0153	17.0546	17.0019	16.6614	16.3835	16.6242	16.6667	10	56.4	21.889	202	0	69.472	16.7589	16.8286	16.7253	16.6669	16.806	16.8017	16.7846
Q945Q1	Q945Q1	Cysteine proteinase inhibitor 1	CYS1	sp|Q945Q1|CYT1_ARATH Cysteine proteinase inhibitor 1 OS=Arabidopsis thaliana GN=CYS1 PE=1 SV=2	1	15.4747	15.5998	15.5557	15.6846	15.5968	15.6276	15.5585	15.6129	15.5373	15.4097	15.5571	15.5209	15.59	15.6289	15.5583	15.6614	15.5124	15.4846	15.4243	15.671	15.809	15.6482	15.686	15.6628	15.7787	15.7633	15.7117	15.7716	15.8959	16.1175	15.9687	5	56.4	11.255	101	0	280.28	16.3225	16.4405	16.378	16.4997	16.4024	16.4679	16.4027
C0Z361	C0Z361	Chaperonin 60 subunit beta 3, chloroplastic	CPN60B3	sp|C0Z361|CPNB3_ARATH Chaperonin 60 subunit beta 3, chloroplastic OS=Arabidopsis thaliana GN=CPN60B3 PE=1 SV=1	1	18.0789	18.0999	17.9551	17.9055	18.363	18.3763	18.4934	18.3347	17.9028	17.8978	18.0358	18.0994	18.0028	18.0308	18.0054	18.1373	18.1031	18.0814	17.9456	18.0848	18.0623	18.1395	18.1608	17.9564	18.0476	17.9799	17.8614	18.2473	18.24	18.1794	18.226	31	56.3	63.324	597	0	323.31	18.2366	18.2506	18.0874	18.0306	18.4786	18.5267	18.6475
Q42290	Q42290	Probable mitochondrial-processing peptidase subunit beta		sp|Q42290|MPPB_ARATH Probable mitochondrial-processing peptidase subunit beta, mitochondrial OS=Arabidopsis thaliana GN=At3g02090 PE=2 SV=2	1	19.0395	19.2085	19.2411	19.3191	19.2405	19.1787	19.1138	19.1692	19.5543	19.721	19.5677	19.734	19.349	19.3891	19.413	19.2898	19.3335	19.2676	19.3624	19.2661	19.3474	19.401	19.272	19.9203	19.9005	19.6218	19.6893	19.3036	19.1485	19.2591	19.2311	25	56.3	59.159	531	0	323.31	19.1555	19.3174	19.3316	19.4025	19.3143	19.2873	19.2263
Q9C8P0	Q9C8P0	Dihydrolipoyllysine-residue acetyltransferase component 5 of pyruvate dehydrogenase complex, chloroplastic	EMB3003	sp|Q9C8P0|ODP25_ARATH Dihydrolipoyllysine-residue acetyltransferase component 5 of pyruvate dehydrogenase complex, chloroplastic OS=Arabidopsis thaliana GN=EMB3003 PE=2 SV=1	1	19.1292	19.1577	19.2619	19.5091	19.2102	19.209	19.1449	19.235	19.4948	19.673	19.7584	19.687	19.3865	19.4842	19.3278	19.3578	19.2193	19.3014	19.5083	19.4751	19.4308	19.6184	19.4851	19.6134	19.5913	19.577	19.7479	19.3566	19.6441	19.6235	19.5086	21	56.3	48.306	465	0	323.31	19.0888	19.1102	19.196	19.436	19.1276	19.1611	19.1009
Q944G9	Q944G9	Probable fructose-bisphosphate aldolase 2, chloroplastic	FBA2	sp|Q944G9|ALFC2_ARATH Probable fructose-bisphosphate aldolase 2, chloroplastic OS=Arabidopsis thaliana GN=FBA2 PE=1 SV=2	1	19.0961	19.0092	19.1696	19.2397	19.1696	19.3239	19.2516	19.2632	19.4593	19.4764	19.4727	19.5193	19.3681	19.3405	19.2633	19.3222	19.4006	19.465	19.359	19.3756	19.4396	19.5021	19.4356	19.471	19.3587	19.3719	19.4441	19.6682	19.4927	19.532	19.5332	20	56.3	42.987	398	0	323.31	19.3548	19.2608	19.4029	19.4658	19.3861	19.5752	19.5067
P32962	P32962	Nitrilase 2	NIT2	sp|P32962|NRL2_ARATH Nitrilase 2 OS=Arabidopsis thaliana GN=NIT2 PE=1 SV=1	1	16.7713	17.1398	16.9254	16.4218	17.0608	16.9352	17.1816	16.7979	17.7586	18.3153	17.9485	18.538	16.4861	16.2214	16.7	16.5309	16.3228	16.2928	16.0299	17.1552	17.3265	16.522	17.0105	16.2702	16.3927	16.7364	16.3784	16.4987	16.4904	16.5191	16.4194	16	56.3	37.153	339	0	194.8	16.7975	17.1591	16.9262	16.4155	17.0448	16.954	17.2043
Q02971;Q02972	Q02971	Cinnamyl alcohol dehydrogenase 7	CAD7	sp|Q02971|CADH7_ARATH Cinnamyl alcohol dehydrogenase 7 OS=Arabidopsis thaliana GN=CAD7 PE=1 SV=2	2	18.1387	18.5006	18.3777	18.6917	18.3014	18.21	18.1198	18.2994	18.5386	18.2842	18.2608	18.2595	18.6193	18.6733	18.2938	18.5064	18.1581	18.117	18.1906	18.4918	18.6065	18.9648	18.8246	18.2538	18.1562	18.1341	18.2482	18.4365	18.7232	18.5283	18.679	16	56.3	38.245	357	0	281.01	18.2658	18.6207	18.4794	18.7862	18.3863	18.3297	18.2434
F4JZY1;REV__F4I893	F4JZY1		CIP1	tr|F4JZY1|F4JZY1_ARATH COP1-interactive protein 1 OS=Arabidopsis thaliana GN=CIP1 PE=4 SV=1	2	20.2682	20.3335	20.2529	20.2206	20.366	20.365	20.3228	20.2833	20.3873	20.614	20.527	20.6157	20.3902	20.373	20.4112	20.3503	20.2501	20.2195	20.1613	20.1948	20.2311	20.2178	20.1664	20.7726	20.8105	20.8087	20.8725	20.2956	20.2381	20.2382	20.2605	91	56.2	181.98	1586	0	323.31	20.3449	20.4032	20.3043	20.2648	20.4006	20.4344	20.396
Q9SJT9	Q9SJT9	Coatomer subunit alpha-2		sp|Q9SJT9|COPA2_ARATH Coatomer subunit alpha-2 OS=Arabidopsis thaliana GN=At2g21390 PE=2 SV=1	1	19.4199	19.4854	19.523	19.534	19.4707	19.4025	19.3199	19.3797	19.4167	19.3084	19.3552	19.2516	19.4363	19.4088	19.4696	19.4735	19.4385	19.572	19.5099	19.4696	19.4298	19.4872	19.4758	19.3922	19.4103	19.5093	19.4123	19.2503	19.2647	19.5702	19.3998	59	56.2	136.47	1218	0	323.31	19.4133	19.4718	19.4909	19.4948	19.4219	19.3884	19.3097
Q9FR44	Q9FR44	Phosphoethanolamine N-methyltransferase 1	NMT1	sp|Q9FR44|PEAM1_ARATH Phosphoethanolamine N-methyltransferase 1 OS=Arabidopsis thaliana GN=NMT1 PE=1 SV=1	1	18.6368	18.6587	18.3675	18.3132	18.664	18.753	18.7394	18.5112	18.0451	17.6587	17.6689	17.6416	18.3321	18.366	18.1745	18.3092	18.5623	18.4236	18.2967	18.0648	18.1747	18.01	18.0002	17.8705	17.8497	17.818	17.8169	18.7409	18.532	18.5548	18.6429	28	56.2	56.102	491	0	104.3	18.5869	18.6018	18.2922	18.2306	18.572	18.6957	18.686
Q9FG38	Q9FG38	Sorting nexin 1	SNX1	sp|Q9FG38|SNX1_ARATH Sorting nexin 1 OS=Arabidopsis thaliana GN=SNX1 PE=1 SV=1	1	18.2388	18.3781	18.3045	18.3506	18.3553	18.3003	18.2536	18.2965	18.4206	18.4702	18.4737	18.4763	18.4155	18.3792	18.3681	18.3314	18.5437	18.4266	18.5195	18.3164	18.4277	18.4253	18.3416	18.5453	18.5888	18.5729	18.5254	18.43	18.4354	18.4779	18.4131	23	56.2	46.523	402	0	108.81	18.3521	18.4844	18.3924	18.4313	18.4264	18.4062	18.3633
Q9M8X9	Q9M8X9	40S ribosomal protein S16-2	RPS16B	sp|Q9M8X9|RS162_ARATH 40S ribosomal protein S16-2 OS=Arabidopsis thaliana GN=RPS16B PE=2 SV=1	1	17.8006	17.9076	17.69	17.7721	17.625	17.5692	17.6543	17.6822	17.8108	17.8805	17.9938	17.9025	17.6625	17.6733	17.6124	17.7395	17.5673	17.5212	17.6024	17.3882	17.3919	17.5851	17.5543	17.4744	17.5259	17.5984	17.5158	17.2674	17.2586	17.3579	17.2698	13	56.2	16.586	146	0	63.542	17.6704	17.7704	17.5343	17.6094	17.4527	17.4316	17.5206
Q9SVD7	Q9SVD7	Ubiquitin-conjugating enzyme E2 variant 1D	UEV1D	sp|Q9SVD7|UEV1D_ARATH Ubiquitin-conjugating enzyme E2 variant 1D OS=Arabidopsis thaliana GN=UEV1D PE=1 SV=1	1	16.6566	16.6867	16.6717	16.6163	16.684	16.6631	16.7002	16.7161	16.626	16.5037	16.5545	16.5236	16.5838	16.6165	16.7168	16.6802	16.6262	16.7318	16.695	16.7441	16.7336	16.5707	16.6642	16.4285	16.5164	16.5226	16.5372	16.461	16.5053	16.5861	16.5144	7	56.2	16.533	146	0	38.621	16.7498	16.7729	16.7395	16.6769	16.735	16.7488	16.7898
Q9SR73	Q9SR73	40S ribosomal protein S28-1	RPS28A	sp|Q9SR73|RS281_ARATH 40S ribosomal protein S28-1 OS=Arabidopsis thaliana GN=RPS28A PE=3 SV=1	1	17.8957	17.912	17.8708	17.8862	17.8197	17.7723	17.8121	17.8484	17.87	17.8162	17.977	17.901	17.7495	17.7994	17.7561	17.7127	17.6338	17.7416	17.7544	17.7516	17.6537	17.6279	17.5948	17.7375	17.6878	17.7229	17.6975	17.5677	17.601	17.5683	17.3253	6	56.2	7.3705	64	0	117.2	18.2973	18.3066	18.247	18.2552	18.1792	18.1665	18.2102
O23627;F4J376	O23627	Glycine--tRNA ligase 1, mitochondrial	GLYRS-1	sp|O23627|SYGM1_ARATH Glycine--tRNA ligase, mitochondrial 1 OS=Arabidopsis thaliana GN=At1g29880 PE=1 SV=1	2	19.6071	19.5831	19.5672	19.5874	19.5094	19.6122	19.607	19.6001	19.5569	19.1778	19.2225	19.2769	19.6165	19.5342	19.4848	19.5711	19.8942	19.6561	19.4743	19.5951	19.6223	19.6008	19.7005	19.3681	19.3359	19.4111	19.3688	19.7147	19.8026	19.7976	19.7576	36	56.1	81.943	729	0	321.66	19.7559	19.7249	19.6906	19.7036	19.616	19.7536	19.7522
Q9SIV0	Q9SIV0	S-alkyl-thiohydroximate lyase SUR1	SUR1	sp|Q9SIV0|SUR1_ARATH S-alkyl-thiohydroximate lyase SUR1 OS=Arabidopsis thaliana GN=SUR1 PE=1 SV=1	1	17.8379	17.9699	17.8083	17.9296	17.8207	17.8936	17.8522	17.8368	17.9697	17.4818	17.5051	17.5137	17.8518	17.7486	17.7079	17.8235	18.6038	18.3466	18.1308	17.9783	18.0573	18.0518	18.0936	17.7984	17.8029	17.7429	17.6817	18.3801	18.491	18.5147	18.4737	21	56.1	51.087	462	0	182.47	17.5784	17.7034	17.5234	17.6375	17.5191	17.6267	17.5892
Q9C9M1	Q9C9M1		F4N21_18	tr|Q9C9M1|Q9C9M1_ARATH Protein-lysine N-methyltransferase At1g66680 OS=Arabidopsis thaliana GN=F4N21_18 PE=1 SV=1	1	17.9197	17.9142	17.7955	17.7228	17.8645	17.9023	17.959	17.9244	17.5025	17.3945	17.399	17.5792	17.6985	17.657	17.7181	17.7047	17.626	17.5238	17.5489	17.5755	17.6198	17.5096	17.5619	17.4608	17.5112	17.5536	17.533	17.5865	17.5646	17.5348	17.5087	16	56.1	39.229	358	0	257.91	17.8742	17.8618	17.7247	17.6448	17.7769	17.8495	17.91
O80626	O80626	60S ribosomal protein L35-2	RPL35B	sp|O80626|RL352_ARATH 60S ribosomal protein L35-2 OS=Arabidopsis thaliana GN=RPL35B PE=2 SV=1	1	13.1778	13.3187	13.074	13.323	12.9454	13.094	12.9409	13.0649	13.1092	13.1703	13.3094	13.4842	12.9913	13.1072	13.141	13.2229	13.1209	13.1373	13.0988	13.1254	12.8162	12.9036	12.8659	12.8355	12.8307	12.7585	13.1221	12.9064	12.5178	12.6369	12.6892	11	56.1	14.231	123	0.0096601	1.4581	13.3125	13.4463	13.1832	13.4251	13.0379	13.2212	13.0719
Q39161	Q39161	Ferredoxin--nitrite reductase, chloroplastic	NIR1	sp|Q39161|NIR_ARATH Ferredoxin--nitrite reductase, chloroplastic OS=Arabidopsis thaliana GN=NIR1 PE=1 SV=1	1	19.4221	19.3857	19.2272	19.206	19.3118	19.4615	19.4039	19.3249	19.4295	19.0963	19.1708	19.2557	19.3916	19.3048	19.3508	19.411	19.4041	19.3196	19.3603	19.2859	19.2598	19.3612	19.2637	19.4461	19.432	19.3867	19.3035	19.2541	19.3882	19.222	19.2749	30	56	65.504	586	0	323.31	19.5378	19.4944	19.3174	19.2891	19.3853	19.5698	19.5161
P23321	P23321	Oxygen-evolving enhancer protein 1-1, chloroplastic	PSBO1	sp|P23321|PSBO1_ARATH Oxygen-evolving enhancer protein 1-1, chloroplastic OS=Arabidopsis thaliana GN=PSBO1 PE=1 SV=2	1	20.151	20.2273	20.0239	20.1419	20.3469	20.261	20.3175	20.023	21.2784	21.6136	21.1979	21.2226	20.6609	20.691	20.483	20.479	21.2812	21.0642	20.9665	20.1039	20.4706	20.4303	20.3942	21.2493	21.2697	20.5342	20.8003	21.3663	20.9678	20.915	21.0777	21	56	35.142	332	0	323.31	20.4324	20.5016	20.2799	20.3907	20.5861	20.535	20.5953
O65639	O65639	Cold shock protein 1	CSP1	sp|O65639|CSP1_ARATH Cold shock protein 1 OS=Arabidopsis thaliana GN=CSP1 PE=1 SV=1	1	18.1085	18.0022	18.0339	18.0932	17.8711	17.87	18.0155	17.9937	18.3013	18.3495	18.3697	18.4471	18.0194	18.0239	18.1117	18.0637	17.9694	17.9572	18.044	17.8749	17.7098	17.8105	17.7988	17.9221	17.892	17.8492	17.8366	17.6644	17.5715	17.5436	17.3964	15	55.9	30.087	299	0	256.01	17.3596	17.2463	17.2595	17.3117	17.0799	17.1136	17.263
Q9LVI8;Q8GXW5	Q9LVI8	Glutamine synthetase cytosolic isozyme 1-3	GLN1-3	sp|Q9LVI8|GLN13_ARATH Glutamine synthetase cytosolic isozyme 1-3 OS=Arabidopsis thaliana GN=GLN1-3 PE=1 SV=1	2	17.1322	17.2527	16.9665	16.9388	17.229	17.2822	17.3736	17.1557	16.83	16.7343	16.8115	16.8544	17.1121	16.9778	16.9375	17.1668	16.8989	16.8887	16.6617	17.1891	17.2058	17.2452	17.2967	17.1691	17.0964	17.0768	17.0059	17.3228	17.2432	17.2024	17.3246	15	55.9	38.594	354	0	184.72	16.6579	16.7713	16.4667	16.4319	16.7125	16.8004	16.8957
Q39172;Q9LFK5;Q9M9M7;Q9C677	Q39172	NADP-dependent alkenal double bond reductase P1	P1	sp|Q39172|P1_ARATH NADP-dependent alkenal double bond reductase P1 OS=Arabidopsis thaliana GN=P1 PE=1 SV=1	4	17.1789	17.2237	17.1521	17.2926	17.1577	17.2577	17.1059	17.1718	17.5906	17.4515	17.4003	17.5016	17.171	17.0994	17.0855	17.2167	17.6081	17.4253	17.1698	17.2372	17.3215	17.2795	17.343	17.118	17.034	17.1447	17.1594	17.3832	17.5633	17.3097	17.413	14	55.9	38.133	345	0	158.65	17.8642	17.902	17.8119	17.9452	17.8008	17.9355	17.7876
Q8L466	Q8L466		At1g24050	tr|Q8L466|Q8L466_ARATH Anticodon-binding domain-containing protein OS=Arabidopsis thaliana GN=At1g24050 PE=1 SV=1	1	16.4289	16.3774	16.4165	16.31	16.4463	16.354	16.384	16.3649	16.3496	16.2115	16.2799	16.1577	16.2743	16.2087	16.3729	16.2853	16.4555	16.3913	16.3812	16.3884	16.3668	16.3206	16.3923	16.2397	16.2686	16.2813	16.2887	16.2724	16.2953	16.3675	16.3333	7	55.9	20.491	188	0	110.54	16.5365	16.478	16.4988	16.3851	16.5118	16.4543	16.488
Q84WU2	Q84WU2	Ubiquitin carboxyl-terminal hydrolase 13	UBP13	sp|Q84WU2|UBP13_ARATH Ubiquitin carboxyl-terminal hydrolase 13 OS=Arabidopsis thaliana GN=UBP13 PE=1 SV=1	1	20.4178	20.3885	20.3764	20.4466	20.2338	20.2184	20.2367	20.267	20.1454	19.8186	19.8812	19.8235	20.3619	20.3331	20.2495	20.366	20.3644	20.2703	20.1922	20.3294	20.3255	20.2877	20.3859	20.0466	20.0222	20.0677	20.0895	20.4128	20.3793	20.4469	20.4844	61	55.8	130.65	1115	0	323.31	20.1828	20.1464	20.1159	20.1789	19.9566	19.9759	19.9981
P49967;P49966;P37106	P49967	Signal recognition particle 54 kDa protein 3	SRP-54C	sp|P49967|SR543_ARATH Signal recognition particle 54 kDa protein 3 OS=Arabidopsis thaliana GN=SRP-54C PE=2 SV=2	3	18.7299	18.7399	18.7867	18.7239	18.8341	18.8307	18.743	18.8023	18.8171	18.9261	18.9106	18.9362	18.6864	18.6534	18.764	18.6684	18.7084	18.6899	18.7452	18.7605	18.7874	18.7783	18.8017	18.6241	18.5651	18.6142	18.5857	18.4829	18.5358	18.6803	18.5619	26	55.8	54.781	495	0	171.29	18.5813	18.5843	18.6126	18.5426	18.6433	18.6746	18.5908
Q9SMQ6;Q9FE79;Q9LH50;Q9SJZ5	Q9SMQ6	Ras-related protein RABA4b	RABA4B	sp|Q9SMQ6|RAA4B_ARATH Ras-related protein RABA4b OS=Arabidopsis thaliana GN=RABA4B PE=1 SV=1	4	15.9917	16.0419	15.9513	15.8807	16.123	16.0666	16.0509	15.9917	15.8711	15.9907	15.8937	15.8919	16.0579	15.9705	16.0139	15.9409	16.0622	16.0008	15.9249	16.0247	16.1559	16.0064	16.0405	16.529	16.6714	16.693	16.5985	16.1381	15.9386	16.1364	16.0448	12	55.8	24.406	224	0	21.902	16.3479	16.3911	16.282	16.2043	16.437	16.4154	16.4035
O80929	O80929	60S ribosomal protein L36-1	RPL36A	sp|O80929|RL361_ARATH 60S ribosomal protein L36-1 OS=Arabidopsis thaliana GN=RPL36A PE=2 SV=1	1	16.613	16.6791	16.6215	16.685	16.5801	16.4932	16.5502	16.5462	16.663	16.6055	16.6901	16.6369	16.5089	16.5558	16.6459	16.5423	16.6333	16.5387	16.5642	16.2763	16.2381	16.365	16.2577	16.4003	16.367	16.4057	16.4654	16.2902	16.2427	16.3812	16.1895	11	55.8	12.736	113	0	8.9142	16.8933	16.9524	16.8764	16.9327	16.8183	16.7662	16.827
Q42344	Q42344	High mobility group B protein 4	HMGB4	sp|Q42344|HMGB4_ARATH High mobility group B protein 4 OS=Arabidopsis thaliana GN=HMGB4 PE=1 SV=1	1	17.0887	17.0318	17.0528	16.9948	17.5849	17.4448	17.4587	17.4178	16.8299	16.7302	16.9398	17.0817	17.0384	17.0733	17.1747	16.9922	16.9553	16.9466	16.9828	17.2269	17.1891	17.2216	17.1272	16.7951	16.7873	16.799	16.771	17.1077	17.0955	17.0978	17.0297	9	55.8	15.42	138	0	21.048	16.9237	16.8598	16.8623	16.7972	17.3777	17.2724	17.2901
Q9LJ87	Q9LJ87	Hsp90 co-chaperone CDC37	CDC37	sp|Q9LJ87|CDC73_ARATH Protein CDC73 homolog OS=Arabidopsis thaliana GN=CDC73 PE=1 SV=1	1	18.4562	18.4516	18.5358	18.507	18.3882	18.3845	18.3553	18.388	18.4236	18.4628	18.5305	18.4453	18.437	18.4063	18.4325	18.4925	18.3512	18.4892	18.4601	18.4801	18.3895	18.4676	18.4414	18.1684	18.1368	18.3252	18.2833	18.2017	18.2108	18.2179	18.2534	19	55.7	47.543	415	0	266.36	18.6482	18.6367	18.7024	18.6664	18.5381	18.5691	18.5438
Q9M591	Q9M591	Magnesium-protoporphyrin IX monomethyl ester [oxidative] cyclase, chloroplastic	CRD1	sp|Q9M591|CRD1_ARATH Magnesium-protoporphyrin IX monomethyl ester [oxidative] cyclase, chloroplastic OS=Arabidopsis thaliana GN=CRD1 PE=1 SV=2	1	18.6604	18.7638	18.8264	18.9394	18.6359	18.685	18.6256	18.6931	19.0425	19.2596	19.1165	19.2342	18.9481	19.1074	19.0279	19.0252	19.287	19.1992	19.1376	18.7672	18.9471	19.0033	18.7923	19.4484	19.4755	19.1987	19.2739	19.118	18.8412	19.0084	19.0342	19	55.7	47.63	409	0	259.71	19.3559	19.4523	19.4964	19.6022	19.2892	19.3731	19.3175
Q9C9C9	Q9C9C9	Cytosolic sulfotransferase 18	SOT18	sp|Q9C9C9|SOT18_ARATH Cytosolic sulfotransferase 18 OS=Arabidopsis thaliana GN=SOT18 PE=1 SV=1	1	18.7793	18.7871	18.7363	18.5127	18.838	18.8716	18.8945	18.8143	18.1558	17.9851	18.1123	18.2267	18.4865	18.4957	18.6142	18.6084	18.603	18.2307	18.1118	18.3185	18.4579	18.3099	18.304	18.2146	18.2303	18.2653	18.1266	18.8768	18.6323	18.4433	18.6144	18	55.7	40.464	350	0	126.06	19.0712	19.0719	19.0028	18.772	19.0877	19.1561	19.1828
P56805	P56805	30S ribosomal protein S15, chloroplastic	rps15	sp|P56805|RR15_ARATH 30S ribosomal protein S15, chloroplastic OS=Arabidopsis thaliana GN=rps15 PE=3 SV=1	1	18.4573	18.3812	18.4266	18.4533	18.3167	18.1891	18.2728	18.332	18.5136	18.531	18.6473	18.6183	18.326	18.5622	18.4296	18.399	18.5549	18.5428	18.6228	18.5914	18.5182	18.4162	18.2546	18.373	18.346	18.4011	18.3873	18.3908	18.4349	18.5895	18.536	6	55.7	10.718	88	0	47.398	18.4007	18.3176	18.3446	18.3641	18.2179	18.1251	18.2126
Q9FIJ2	Q9FIJ2	NADH dehydrogenase [ubiquinone] 1 alpha subcomplex subunit 2		sp|Q9FIJ2|NDUA2_ARATH NADH dehydrogenase [ubiquinone] 1 alpha subcomplex subunit 2 OS=Arabidopsis thaliana GN=At5g47890 PE=3 SV=1	1	16.3594	16.2106	16.4361	16.4843	16.3415	16.3074	16.2629	16.3416	16.7345	16.8527	16.8202	16.9765	16.5053	16.5584	16.5437	16.5184	16.3529	16.3955	16.4099	16.5468	16.7471	16.6485	16.3711	17.0216	17.0722	16.8897	16.8871	16.3969	16.3868	16.3983	16.5069	5	55.7	10.851	97	0	35.977	16.6953	16.5396	16.7466	16.7876	16.6352	16.6359	16.5953
Q9FE63;Q38905	Q9FE63	Profilin-5	PRO5	sp|Q9FE63|PROF5_ARATH Profilin-5 OS=Arabidopsis thaliana GN=PRO5 PE=2 SV=1	2	15.381	15.4246	15.4216	15.5545	15.359	15.2921	15.3843	15.3696	15.7211	15.7232	15.7435	15.7982	15.5345	15.5988	15.44	15.6	15.5763	15.7493	15.5713	15.6038	15.642	15.6747	15.6009	16.0665	15.9171	15.9578	16.0465	15.9006	15.9995	15.97	15.8278	4	55.7	14.036	131	0	33.879	15.5464	15.5829	15.5616	15.6873	15.4822	15.45	15.5461
P22738	P22738	60S ribosomal protein L3-2	ARP2	sp|P22738|RL32_ARATH 60S ribosomal protein L3-2 OS=Arabidopsis thaliana GN=ARP2 PE=2 SV=4	1	20.6534	20.6749	20.6125	20.6218	20.5407	20.5176	20.5846	20.6106	20.4521	20.3738	20.4887	20.4244	20.5303	20.5259	20.5583	20.5204	20.3892	20.4081	20.4466	20.2294	20.1583	20.2296	20.2088	20.3671	20.3689	20.3575	20.4035	20.2576	20.2732	20.3099	20.1783	27	55.6	44.546	390	0	185.47	20.7566	20.771	20.6902	20.6923	20.6017	20.6133	20.6842
Q9FNN5	Q9FNN5	NADH dehydrogenase [ubiquinone] flavoprotein 1, mitochondrial		sp|Q9FNN5|NDUV1_ARATH NADH dehydrogenase [ubiquinone] flavoprotein 1, mitochondrial OS=Arabidopsis thaliana GN=At5g08530 PE=2 SV=1	1	18.4169	18.594	18.5685	18.6833	18.6649	18.5374	18.4779	18.5962	19.0604	19.3004	19.2863	19.4464	18.749	18.8835	18.7686	18.7263	18.6339	18.574	18.6188	18.6734	18.8346	18.6934	18.5746	19.3423	19.3475	19.0953	19.1896	18.6502	18.5123	18.6071	18.6153	22	55.6	53.449	486	0	323.31	18.4125	18.5826	18.5386	18.6463	18.6183	18.5256	18.47
Q94CK1	Q94CK1		At5g12410	tr|Q94CK1|Q94CK1_ARATH At5g12410 OS=Arabidopsis thaliana GN=At5g12410 PE=2 SV=1	1	18.6256	18.6254	18.6461	18.6642	18.4411	18.527	18.466	18.5617	18.2518	18.0338	18.1192	18.1081	18.5335	18.5672	18.6268	18.6602	18.4559	18.5106	18.4292	18.6281	18.7084	18.5468	18.6523	18.2699	18.2608	18.2362	18.3919	18.544	18.5798	18.6145	18.5677	19	55.6	41.94	376	0	199.09	18.5989	18.5917	18.594	18.6049	18.3722	18.4928	18.4358
Q8LCE1	Q8LCE1	Glutamine synthetase cytosolic isozyme 1-2	GLN1-2	sp|Q8LCE1|GLN12_ARATH Glutamine synthetase cytosolic isozyme 1-2 OS=Arabidopsis thaliana GN=GLN1-2 PE=1 SV=2	1	18.0524	18.1279	17.8321	17.7166	18.1815	18.3	18.4002	18.0782	17.6877	17.5067	17.6706	17.6175	18.004	17.8135	17.771	18.0046	17.7662	17.7378	17.4501	18.0607	18.1878	18.0526	18.1423	18.0415	18.1107	18.1678	17.9976	17.9348	17.7959	17.8358	17.8666	17	55.6	39.207	356	0	170.46	18.1987	18.2672	17.953	17.8303	18.2856	18.4389	18.5429
Q9LZD4	Q9LZD4	Ras-related protein RABE1d	RABE1D	sp|Q9LZD4|RAE1D_ARATH Ras-related protein RABE1d OS=Arabidopsis thaliana GN=RABE1D PE=1 SV=1	1	18.1883	18.3249	18.2214	18.1738	18.3347	18.2206	18.2364	18.1928	18.2993	18.3322	18.2654	18.2398	18.3852	18.2746	18.2205	18.1994	18.3108	18.1911	18.134	18.1062	18.2329	18.1906	18.1301	18.6783	18.7744	18.7218	18.6656	18.2989	18.0945	18.1975	18.3068	14	55.6	24.037	216	0	55.426	17.9405	18.0701	17.9483	17.8934	18.0448	17.9654	17.9851
Q9SSS9	Q9SSS9	ATP synthase subunit delta, chloroplastic	ATPD	sp|Q9SSS9|ATPD_ARATH ATP synthase subunit delta, chloroplastic OS=Arabidopsis thaliana GN=ATPD PE=1 SV=1	1	18.8312	18.9356	18.8123	18.8506	18.897	19.1208	18.8509	18.8031	19.1855	19.2603	19.1886	19.2004	19.1334	19.0904	18.9781	18.9752	19.3331	19.1238	19.1016	18.8038	19.1385	18.9629	18.9384	19.2209	19.2373	18.9162	19.0454	19.3006	19.228	19.1095	19.2058	13	55.6	25.668	234	0	90.961	19.0149	19.1122	18.9705	19.0016	19.0385	19.2971	19.031
Q8LFQ6	Q8LFQ6	Glutaredoxin-C4	GRXC4	sp|Q8LFQ6|GRXC4_ARATH Glutaredoxin-C4 OS=Arabidopsis thaliana GN=GRXC4 PE=2 SV=2	1	16.9018	16.8564	16.8192	16.7529	16.8524	16.847	16.9	16.8263	16.9376	17.0317	17.029	17.137	16.8658	16.7946	16.8516	16.8515	16.8315	16.8592	16.6765	16.873	16.8322	16.7885	16.7634	17.2245	17.1947	17.3832	17.2381	16.7769	16.714	16.7992	16.6993	7	55.6	14.827	135	0	216.23	17.1826	17.1302	17.0745	17.0011	17.091	17.1204	17.1772
Q9LUX9	Q9LUX9	Probable NAD(P)H dehydrogenase (quinone) FQR1-like 3		sp|Q9LUX9|FQRL3_ARATH Probable NAD(P)H dehydrogenase (quinone) FQR1-like 3 OS=Arabidopsis thaliana GN=At5g58800 PE=2 SV=1	1	16.1955	16.3488	16.3404	16.2967	16.3054	16.3013	16.4149	16.2775	16.3551	16.5671	16.442	16.4374	16.3641	16.4698	16.3007	16.385	16.3764	16.3504	16.3024	16.313	16.323	16.3752	16.3009	16.6104	16.5906	16.6696	16.6377	16.4811	16.4705	16.3989	16.6018	7	55.6	22.723	207	0	98.617	16.3336	16.4799	16.4531	16.4022	16.4014	16.432	16.5494
O64517;O64518;O64519	O64517	Metacaspase-4;Metacaspase-4 subunit p20;Metacaspase-4 subunit p10	AMC4	sp|O64517|MCA4_ARATH Metacaspase-4 OS=Arabidopsis thaliana GN=AMC4 PE=1 SV=1	3	18.5839	18.7112	18.6724	18.6532	18.7658	18.7897	18.7093	18.6947	18.662	18.6399	18.6041	18.7199	18.7463	18.7863	18.8008	18.7217	18.7195	18.6494	18.6082	18.7127	18.8049	18.72	18.6298	18.7962	18.7879	18.6965	18.7609	18.834	18.7742	18.7072	18.7153	20	55.5	45.483	418	0	204.21	18.6078	18.7281	18.6709	18.6446	18.7475	18.8062	18.7297
Q0WMV8;P0DI19	Q0WMV8;P0DI19	PHD finger-like domain-containing protein 5B;PHD finger-like domain-containing protein 5A		sp|Q0WMV8|PHF5B_ARATH PHD finger-like domain-containing protein 5B OS=Arabidopsis thaliana GN=At1g07170 PE=2 SV=1;sp|P0DI19|PHF5A_ARATH PHD finger-like domain-containing protein 5A OS=Arabidopsis thaliana GN=At2g30000 PE=3 SV=1	2	16.5118	16.401	16.5242	16.4456	16.5182	16.5396	16.5693	16.5332	16.3582	16.3359	16.5434	16.4866	16.4518	16.3779	16.4575	16.442	16.1478	16.4619	16.4743	16.4558	16.3375	16.5141	16.3317	16.2899	16.31	16.4859	16.3403	15.9613	16.1193	16.267	16.1361	7	55.5	12.428	110	0	46.363	16.7418	16.624	16.7288	16.643	16.706	16.7621	16.7958
O65572	O65572	Carotenoid 9,10(9,10)-cleavage dioxygenase 1	CCD1	sp|O65572|CCD1_ARATH Carotenoid 9,10(9,10)-cleavage dioxygenase 1 OS=Arabidopsis thaliana GN=CCD1 PE=1 SV=2	1	18.933	18.9445	18.9528	18.9292	18.888	18.9165	18.8632	18.8793	19.0875	19.2762	19.2313	19.2972	19.0054	19.0429	19.0409	18.9511	19.127	19.0583	18.9698	18.8315	18.961	18.8384	18.8212	19.4592	19.3971	19.4876	19.4972	19.1325	18.9299	19.0286	19.009	27	55.4	60.907	538	0	323.31	19.2391	19.2435	19.2334	19.2026	19.1518	19.2152	19.1657
Q00218	Q00218	Phospho-2-dehydro-3-deoxyheptonate aldolase 2, chloroplastic	DHS2	sp|Q00218|AROG_ARATH Phospho-2-dehydro-3-deoxyheptonate aldolase 2, chloroplastic OS=Arabidopsis thaliana GN=DHS2 PE=2 SV=2	1	18.795	18.9459	18.951	19.0655	18.8503	18.8156	18.6415	18.8528	19.0954	19.155	19.0753	19.1508	19.1391	19.1182	18.9996	19.0626	19.1112	19.0245	19.156	18.9814	19.0964	19.1364	19.0279	19.0861	19.0487	19.0459	19.1103	19.04	19.082	19.1625	19.0953	27	55.4	56.148	507	0	265.19	18.9752	19.1191	19.1057	19.2131	18.9883	18.9883	18.8181
Q9FEB5	Q9FEB5	Phosphoglucan phosphatase DSP4, chloroplastic	DSP4	sp|Q9FEB5|DSP4_ARATH Phosphoglucan phosphatase DSP4, chloroplastic OS=Arabidopsis thaliana GN=DSP4 PE=1 SV=1	1	19.0137	19.0564	18.9925	18.9956	19.0108	19.0064	18.9021	19.0244	18.5569	17.9479	17.9634	18.0167	18.8864	19.1449	19.1409	19.1046	18.7724	18.6133	18.3737	19.3587	19.2326	18.9588	18.9786	18.1643	17.9108	17.9044	18.0358	19.5961	19.4555	19.4432	19.54	20	55.4	42.625	379	0	323.31	19.0231	19.0588	18.9764	18.9724	18.978	19.0084	18.9079
Q42580	Q42580	Peroxidase 21	PER21	sp|Q42580|PER21_ARATH Peroxidase 21 OS=Arabidopsis thaliana GN=PER21 PE=1 SV=1	1	18.4861	18.532	18.6039	18.3768	18.1619	18.0717	17.9337	18.1949	18.5855	18.7811	18.5645	18.6619	18.7068	18.508	18.7059	18.4366	18.3578	18.5923	18.5437	18.7456	18.7039	18.4241	18.5685	19.1841	19.0561	19.1077	18.8897	19.023	19.4008	19.1208	19.2422	16	55.4	36.741	327	0	323.31	18.9603	18.9992	19.0527	18.8184	18.5939	18.5385	18.4043
Q9ZW33	Q9ZW33	Mitochondrial import inner membrane translocase subunit TIM10	TIM10	sp|Q9ZW33|TIM10_ARATH Mitochondrial import inner membrane translocase subunit TIM10 OS=Arabidopsis thaliana GN=TIM10 PE=1 SV=1	1	16.6554	16.4951	16.4878	16.6296	16.8824	16.8598	16.8895	16.7355	16.1738	15.9586	16.1298	16.1789	16.4526	16.4408	16.43	16.4867	16.5605	16.5966	16.5664	16.5887	16.726	16.821	16.5207	16.8872	16.8395	16.9312	16.7149	16.4912	16.4808	16.5621	16.4172	4	55.4	9.3387	83	0	42.817	17.7832	17.6158	17.5902	17.7248	17.968	17.9802	18.0137
O04658	O04658	Probable nucleolar protein 5-1	NOP5-1	sp|O04658|NOP5A_ARATH Probable nucleolar protein 5-1 OS=Arabidopsis thaliana GN=NOP5-1 PE=2 SV=2	1	18.389	18.2053	18.3373	18.1908	18.4843	18.5407	18.4969	18.4371	18.3357	18.4937	18.4674	18.6368	18.2156	18.0936	18.2907	18.212	18.2217	18.4948	18.4309	18.4259	18.3749	18.3272	18.4067	18.0523	18.2093	18.1623	18.2034	17.9371	18.0825	18.1743	17.991	25	55.3	58.754	533	0	279.08	18.6116	18.4209	18.5344	18.3808	18.6647	18.7559	18.7159
Q42472;Q9LSH2	Q42472	Glutamate decarboxylase 2	GAD2	sp|Q42472|DCE2_ARATH Glutamate decarboxylase 2 OS=Arabidopsis thaliana GN=GAD2 PE=1 SV=1	2	19.5563	19.4734	19.5455	19.4819	19.6115	19.623	19.6089	19.533	19.2158	18.9382	19.0249	18.945	19.4285	19.4416	19.4862	19.4756	19.4925	19.4814	19.3043	19.6085	19.6128	19.4462	19.4896	19.5273	19.4805	19.5328	19.4882	19.7412	19.5883	19.6994	19.6439	24	55.3	56.14	494	0	323.31	19.7589	19.6689	19.7227	19.6519	19.7719	19.8182	19.8079
Q8LF48	Q8LF48	3-ketoacyl-CoA thiolase 1, peroxisomal	KAT1	sp|Q8LF48|THIK1_ARATH 3-ketoacyl-CoA thiolase 1, peroxisomal OS=Arabidopsis thaliana GN=KAT1 PE=2 SV=2	1	17.0224	17.1065	17.1188	17.1677	17.0881	17.1306	17.0995	17.1001	17.3477	17.6735	17.5034	17.6516	17.0165	17.0885	17.1454	17.053	17.2513	17.4021	17.5109	17.4449	17.2982	17.3769	17.4257	17.2356	17.252	17.3173	17.4127	17.2246	17.381	17.4497	17.3123	17	55.3	46.611	443	0	221.31	16.7215	16.7985	16.7925	16.8342	16.745	16.8223	16.795
Q9LQ96	Q9LQ96		T1N6.1	tr|Q9LQ96|Q9LQ96_ARATH Polyphosphoinositide binding protein, putative OS=Arabidopsis thaliana GN=T1N6.1 PE=2 SV=1	1	16.2583	16.3209	16.2117	16.2504	16.2619	16.3551	16.2718	16.2534	16.1924	16.2962	16.1916	16.2257	16.2863	16.2318	16.2284	16.2491	16.3373	16.3484	16.3207	16.2258	16.3386	16.3757	16.3137	16.5464	16.5958	16.5501	16.623	16.4159	16.4325	16.291	16.323	11	55.3	29.216	255	0	58.835	16.0811	16.1368	16.0091	16.0407	16.0426	16.1706	16.0911
O64644	O64644	Histone deacetylase complex subunit SAP18		sp|O64644|SAP18_ARATH Histone deacetylase complex subunit SAP18 OS=Arabidopsis thaliana GN=At2g45640 PE=1 SV=1	1	17.6636	17.5287	17.7222	17.5397	17.6977	17.6889	17.6003	17.6427	17.5152	17.5729	17.7195	17.8223	17.4864	17.3046	17.6281	17.4626	17.4193	17.5615	17.4201	17.3386	17.3791	17.4357	17.3376	17.467	17.4357	17.4512	17.4393	17.108	17.1404	17.2854	17.032	10	55.3	17.164	152	0	35.339	17.6641	17.5221	17.6972	17.5075	17.6559	17.682	17.5972
Q9M3D2	Q9M3D2	60S ribosomal protein L35-3	RPL35C	sp|Q9M3D2|RL353_ARATH 60S ribosomal protein L35-3 OS=Arabidopsis thaliana GN=RPL35C PE=2 SV=1	1	16.2309	16.2207	16.2511	16.2844	16.1784	16.1782	16.2617	16.178	16.2393	16.2092	16.2192	16.2337	16.2036	16.1668	16.2954	16.2199	16.2155	16.3015	16.2122	16.0375	15.9583	16.0343	15.9978	16.1453	16.1332	16.1317	16.2275	16.0204	15.9328	16.0958	15.8937	10	55.3	14.177	123	0	3.3645	16.5701	16.553	16.5649	16.5911	16.4755	16.51	16.5974
Q9ZVA2	Q9ZVA2		F9K20.12	tr|Q9ZVA2|Q9ZVA2_ARATH At1g78830/F9K20_12 OS=Arabidopsis thaliana GN=F9K20.12 PE=2 SV=1	1	19.3185	19.3014	19.4619	19.6218	19.5053	19.3701	19.331	19.3801	19.9308	20.1692	20.1148	20.0159	19.4245	19.5448	19.5095	19.4758	19.2753	19.6925	19.9924	19.347	19.2467	19.6604	19.5093	19.5011	19.4438	19.5524	19.6211	19.6066	19.6055	19.6285	19.6316	21	55.2	50.342	455	0	323.31	19.4829	19.4587	19.6008	19.7536	19.6275	19.5271	19.4918
Q9SR15	Q9SR15		F7O18.7	sp|Q9SR15|SYWC_ARATH Tryptophan--tRNA ligase, cytoplasmic OS=Arabidopsis thaliana GN=At3g04600 PE=2 SV=1	1	18.2831	18.3162	18.321	18.3216	18.3965	18.4065	18.2837	18.3463	18.4213	18.6185	18.4573	18.3576	18.2664	18.2542	18.2703	18.2906	18.4578	18.47	18.5514	18.3905	18.3969	18.5817	18.5761	18.2177	18.2138	18.193	18.3157	18.5068	18.615	18.5789	18.6536	20	55.2	45.754	402	0	169	18.2365	18.2626	18.249	18.2424	18.3078	18.3526	18.2336
Q9SIL6	Q9SIL6	Prohibitin-6, mitochondrial	PHB6	sp|Q9SIL6|PHB6_ARATH Prohibitin-6, mitochondrial OS=Arabidopsis thaliana GN=PHB6 PE=1 SV=1	1	17.2609	17.4642	17.4584	17.5962	17.5642	17.4576	17.4324	17.403	18.1498	18.4552	18.2917	18.4989	17.6709	17.7251	17.6944	17.6323	17.822	17.7206	17.8149	17.5618	17.7638	17.7181	17.5963	18.4417	18.4963	18.2041	18.276	17.7682	17.6464	17.6913	17.7457	13	55.2	31.636	286	0	297.1	17.4353	17.6316	17.6074	17.738	17.6964	17.6246	17.6032
Q9LPW0	Q9LPW0	Glyceraldehyde-3-phosphate dehydrogenase GAPA2, chloroplastic	GAPA2	sp|Q9LPW0|G3PA2_ARATH Glyceraldehyde-3-phosphate dehydrogenase GAPA2, chloroplastic OS=Arabidopsis thaliana GN=GAPA2 PE=2 SV=1	1	18.7357	18.7407	18.8112	18.947	18.6341	18.8705	18.7734	18.7558	18.7101	18.3687	18.4265	18.3681	18.9431	19.0872	19.012	18.9599	18.7117	18.7863	18.8744	18.8926	18.9946	18.8145	18.8286	18.442	18.2572	18.2274	18.3449	19.0805	19.2414	19.0962	19.1446	23	55.1	42.846	399	0	284.79	18.635	18.6329	18.685	18.8137	18.4912	18.7623	18.6691
Q9ZUG4	Q9ZUG4	Methylthioribose-1-phosphate isomerase		sp|Q9ZUG4|MTNA_ARATH Methylthioribose-1-phosphate isomerase OS=Arabidopsis thaliana GN=At2g05830 PE=1 SV=2	1	18.0603	18.0203	18.0145	17.954	18.133	18.1774	18.1333	18.0938	17.91	17.7435	17.8539	17.9892	17.8779	17.907	17.9557	17.9364	18.0029	17.8544	17.7672	18.075	18.1346	18.0663	18.0363	17.924	17.9722	17.9544	17.9673	18.0106	17.905	17.9738	17.9063	17	55.1	39.612	374	0	113.39	17.9038	17.8568	17.8326	17.7649	17.9344	18.0136	17.9733
Q96299;Q9C5W6	Q96299	14-3-3-like protein GF14 mu	GRF9	sp|Q96299|14339_ARATH 14-3-3-like protein GF14 mu OS=Arabidopsis thaliana GN=GRF9 PE=1 SV=2	2	18.2677	18.3131	18.131	18.1382	18.1323	18.1941	18.243	18.1862	18.0232	17.8364	17.8495	17.8707	18.2584	18.2655	18.1523	18.2446	18.2091	17.9839	17.9888	18.0938	18.171	18.2178	18.1699	18.149	18.1506	18.157	18.1795	18.2922	18.2091	18.1559	18.2584	14	55.1	29.52	263	0	179.42	18.093	18.1314	17.9309	17.9309	17.9154	18.012	18.0648
Q9LZG0	Q9LZG0	Adenosine kinase 2	ADK2	sp|Q9LZG0|ADK2_ARATH Adenosine kinase 2 OS=Arabidopsis thaliana GN=ADK2 PE=1 SV=1	1	15.7995	15.8731	15.7766	15.7158	15.8223	15.973	15.8762	15.7952	16.0337	15.9556	15.9029	15.9869	15.9223	15.8764	15.8349	15.9312	15.8659	15.9243	15.8726	15.8747	15.9625	15.9238	15.9335	16.0405	16.0525	16.0947	16.0597	15.8077	15.9626	15.984	15.8167	14	55.1	37.846	345	0	97.043	15.7944	15.861	15.7461	15.6781	15.775	15.9605	15.8676
Q94AH9;Q9FHB3	Q94AH9	Mediator of RNA polymerase II transcription subunit 36a	MED36A	sp|Q94AH9|MD36A_ARATH Mediator of RNA polymerase II transcription subunit 36a OS=Arabidopsis thaliana GN=MED36A PE=1 SV=2	2	19.3509	19.2168	19.3381	19.2434	19.4211	19.3965	19.3588	19.3675	19.3491	19.3265	19.3971	19.4461	19.1374	19.098	19.2574	19.2065	19.1995	19.3363	19.303	19.2766	19.1799	19.1739	19.1877	18.9295	18.9645	18.9999	18.9425	18.7488	18.8462	19.0261	18.8277	23	55	33.653	320	0	262.84	19.4242	19.2832	19.386	19.2842	19.4523	19.4624	19.4286
Q9C928	Q9C928		F14G24.20	tr|Q9C928|Q9C928_ARATH Putative uncharacterized protein At1g52930 OS=Arabidopsis thaliana GN=F14G24.20 PE=2 SV=1	1	18.5284	18.4103	18.5554	18.4915	18.5286	18.5229	18.4704	18.4906	18.6699	18.6698	18.7193	18.701	18.4839	18.4369	18.5625	18.5431	18.3973	18.5691	18.4815	18.615	18.459	18.5148	18.4795	18.3489	18.4274	18.4595	18.3537	18.0669	18.035	18.2803	18.1205	18	55	36.696	320	0	122.3	18.5614	18.4362	18.5629	18.4918	18.5194	18.5484	18.4998
Q84W65	Q84W65	SufE-like protein 1, chloroplastic/mitochondrial	SUFE1	sp|Q84W65|SUFE1_ARATH SufE-like protein 1, chloroplastic/mitochondrial OS=Arabidopsis thaliana GN=SUFE1 PE=1 SV=2	1	17.5845	17.7033	17.6934	17.6823	17.5833	17.7408	17.5845	17.659	17.4278	17.226	17.1992	17.3658	17.6501	17.7136	17.7157	17.7473	17.7445	17.5322	17.4208	17.7209	17.8111	17.6774	17.669	17.3829	17.2836	17.2907	17.3	17.9086	17.8419	17.9043	17.8196	16	55	40.833	371	0	323.31	17.9088	18.0205	17.9922	17.9739	17.8653	18.0576	17.9051
P16181	P16181	40S ribosomal protein S11-1	RPS11A	sp|P16181|RS111_ARATH 40S ribosomal protein S11-1 OS=Arabidopsis thaliana GN=RPS11A PE=2 SV=1	1	20.2402	20.2268	20.2073	20.1921	20.0741	20.0814	20.1477	20.1792	20.0411	20.066	20.1388	20.1643	20.0794	20.1653	20.1618	20.1041	19.843	19.8547	19.9023	20.0287	19.9479	19.8976	19.9046	19.9188	19.9015	19.8878	19.908	19.7484	19.727	19.8236	19.6518	14	55	17.957	160	0	67.962	20.477	20.4566	20.4187	20.3963	20.2688	20.3109	20.381
Q9SRI1	Q9SRI1	Protein transport protein SEC13 homolog A	SEC13A	sp|Q9SRI1|SC13A_ARATH Protein transport protein SEC13 homolog A OS=Arabidopsis thaliana GN=SEC13A PE=1 SV=1	1	18.7696	18.7609	18.7407	18.7664	18.7591	18.9228	18.8512	18.8994	18.4891	18.2482	18.3256	18.4201	18.7556	18.6894	18.6309	18.7207	18.6095	18.5825	18.5152	18.8416	18.8993	18.8231	18.975	18.3507	18.3095	18.4556	18.4223	18.9655	18.975	18.886	19.0146	14	55	32.63	302	0	102.03	18.9748	18.959	18.9204	18.9389	18.9221	19.1206	19.0528
Q9C500;Q9FMH6	Q9C500	WPP domain-containing protein 2	WPP2	sp|Q9C500|WPP2_ARATH WPP domain-containing protein 2 OS=Arabidopsis thaliana GN=WPP2 PE=1 SV=1	2	16.3126	16.4976	16.4359	16.475	16.4976	16.5522	16.5385	16.4975	16.5635	16.6143	16.7378	16.7672	16.5393	16.4631	16.4566	16.6049	16.3963	16.4948	16.4336	16.5176	16.4531	16.4979	16.4794	16.7388	16.7179	16.7095	16.7286	16.2951	16.3702	16.4052	16.3562	8	55	19.134	180	0	180.57	16.0277	16.2057	16.1256	16.1575	16.1705	16.26	16.2501
[truncated: 7,114 more rows]
[truncated: 36 more columns]
